# Supplementary material for: Thalamocortical control of cell-type specificity drives a circuit for processing whisker-related information in mouse barrel cortex
Source: Research Square preprint supplement (doi:10.21203/rs.3.rs-2347992/v1), 2023-01-06
Supplement: Supplementary file 1 [file 75989fd529614d35951b2c23.xlsx]

## Sheet: Summary
Experiment	Description
1. Visium_Celsr3cKO_vs_Cont_DEG	Visium L4 barcodes: Celsr3 cKO (n=85) vs Control (n=73) DEG
2. Visium_L4_septa_vs_hollow_DEG	Visium L4 barcodes: WT septa (n=37) vs WT hollow (n=75) DEG
3. P4_L4_septa_vs_hollow_DEG	L4 scRNA-seq: P4 septa (n=243) vs P4 hollow (n=365)
4. P7_L4_septa_vs_hollow_DEG	L4 scRNA-seq: P7 septa (n=451) vs P7 hollow (n=562)
Term	Explanation
Pattern	Barrel ctx ISH pattern
Cluster gene	Used for L4 clustering
padj / p_val_adj	Arranged in ascending order

## Sheet: 1. Visium_Celsr3cKO_vs_Cont_DEG
Gene	baseMean	log2FoldChange	lfcSE	stat	pvalue	padj	Pattern	Clustering gene
Tmsb10	115.392	-1.39997	0.0690768	-20.2668	2.52436e-91	2.41481e-87
Mbp	4.03767	-2.68175	0.173056	-15.4964	3.66709e-54	1.75397e-50
Ndufa3	14.276	-1.13632	0.0829973	-13.6911	1.14776e-42	3.65983e-39
Mt1	9.77708	-1.60915	0.119234	-13.4957	1.65858e-41	3.9665e-38
Mt3	19.5567	-1.18097	0.0905139	-13.0474	6.57934e-39	1.25876e-35
Thy1	9.88934	-1.34139	0.103784	-12.9247	3.26443e-38	5.20459e-35
Atp5md	48.968	-0.845511	0.0669837	-12.6226	1.58403e-36	2.16469e-33
Polr2l	4.16895	-1.9031	0.15562	-12.2291	2.17264e-34	2.59793e-31
Atp5mpl	32.1211	-0.903168	0.0782307	-11.5449	7.83107e-31	8.32356e-28
Atp5k	23.3466	-0.938904	0.0824519	-11.3873	4.8382e-30	4.62823e-27
Uqcr11	31.1234	-0.826513	0.073055	-11.3136	1.12432e-29	9.77747e-27
Rpl38	46.9481	-0.732666	0.0655027	-11.1853	4.81421e-29	3.83772e-26
Plp1	1.26522	-3.04667	0.275867	-11.044	2.34459e-28	1.72526e-25
Cst3	102.598	-0.899343	0.0833617	-10.7884	3.90342e-27	2.66715e-24
Cd24a	8.2375	1.50369	0.139543	10.7759	4.47467e-27	2.85365e-24	Septa	YES
Uqcrq	34.3342	-0.709288	0.0671721	-10.5593	4.6023e-26	2.7516e-23
Rpl37	37.2587	-0.766255	0.0734742	-10.4289	1.82994e-25	1.02972e-22
Cox6c	63.451	-0.706844	0.0678803	-10.4131	2.16077e-25	1.14833e-22
Atp5j2	32.7333	-0.700664	0.0722345	-9.69985	3.01942e-22	1.5202e-19
Cox7c	49.6066	-0.706484	0.0736005	-9.59891	8.07949e-22	3.86442e-19
Gapdh	54.5498	-0.660406	0.0688833	-9.58731	9.04105e-22	4.11841e-19
Slc1a2	21.1872	-0.930288	0.0982468	-9.46889	2.82825e-21	1.22978e-18
Gm47283	11.3705	-0.939229	0.0999473	-9.39725	5.60098e-21	2.32952e-18
Met	3.02016	2.07037	0.221492	9.34741	8.98234e-21	3.58021e-18	Septa	YES
Rorb	2.91998	-1.52445	0.163485	-9.32469	1.11304e-20	4.25894e-18
Gap43	43.1464	0.803117	0.0879776	9.12866	6.93554e-20	2.55174e-17	Septa	YES
Rpl17	20.4431	0.706823	0.0780774	9.05285	1.3929e-19	4.89229e-17
Sec61g	14.5304	-0.801514	0.0885668	-9.04982	1.43199e-19	4.89229e-17
Whrn	1.58139	-2.40659	0.267287	-9.00377	2.18103e-19	7.00594e-17	Hollow	YES
Tpm3-rs7	1.01567	2.58547	0.28718	9.00296	2.19714e-19	7.00594e-17
Ndufa1	12.2492	-0.883881	0.0986683	-8.9581	3.30326e-19	1.01932e-16
Fam163b	3.09076	-1.47726	0.167287	-8.83069	1.04031e-18	3.10986e-16
Cycs	19.6221	-0.729221	0.0837421	-8.70794	3.09439e-18	8.96998e-16
Cox5a	27.7649	-0.610361	0.071148	-8.57875	9.59126e-18	2.69853e-15
Olfm1	22.5599	-0.735652	0.0869956	-8.4562	2.76235e-17	7.5499e-15
Snhg9	2.15377	-1.56643	0.185313	-8.45288	2.84207e-17	7.55202e-15
Sncb	11.1805	-0.894642	0.105895	-8.44838	2.95384e-17	7.63686e-15
Ldhb	11.019	-0.778968	0.0923196	-8.43773	3.23562e-17	8.14526e-15
Ndufb1-ps	12.5383	-0.792341	0.0939471	-8.43391	3.34314e-17	8.20012e-15
Hlf	1.48301	-2.00827	0.240138	-8.36299	6.11465e-17	1.46232e-14	Hollow	YES
Cabp1	2.29368	-1.54345	0.186471	-8.27716	1.26148e-16	2.90533e-14
Aldoc	8.68277	-1.03155	0.124646	-8.27583	1.2756e-16	2.90533e-14
Aldoa	17.7414	-0.669965	0.0812179	-8.24898	1.59755e-16	3.49843e-14
Cdk11b	2.47959	-1.5412	0.186855	-8.24811	1.60914e-16	3.49843e-14
Cops9	19.6435	-0.653983	0.0794211	-8.23438	1.80493e-16	3.83689e-14
Gm42418	4.61731	1.41056	0.172598	8.17255	3.01944e-16	6.27912e-14
Sema7a	5.27316	-1.13668	0.139363	-8.15625	3.45576e-16	7.03358e-14	Hollow	YES
Higd1a	9.70966	-0.792357	0.098299	-8.06068	7.58681e-16	1.51199e-13
Ndufa5	15.4852	-0.659524	0.0818807	-8.05469	7.96828e-16	1.5556e-13
Fth1	100.926	-0.579113	0.0721375	-8.02791	9.91469e-16	1.89688e-13
Ndufb9	17.2167	-0.684646	0.0856274	-7.99564	1.28908e-15	2.4179e-13
Gm11808	2.24966	-1.4573	0.182943	-7.96585	1.64098e-15	3.01878e-13
Ndufa13	12.6068	-0.719151	0.0906761	-7.931	2.17394e-15	3.92375e-13
Rpl41	75.7797	-0.478856	0.0605173	-7.91271	2.51844e-15	4.46136e-13
Ubb	52.0645	-0.554049	0.0704978	-7.85909	3.86938e-15	6.72991e-13
Apoe	22.3431	-0.680899	0.0871138	-7.8162	5.44411e-15	9.29971e-13
Scg5	43.0441	-0.603869	0.0774822	-7.79365	6.51019e-15	1.09257e-12
Ndufb8	15.0699	-0.6264	0.0808752	-7.74527	9.53804e-15	1.57312e-12
Gabra5	3.58151	1.43051	0.185452	7.71364	1.22281e-14	1.98261e-12
Atp6ap1l	0.781998	-2.32653	0.303063	-7.67672	1.63214e-14	2.60217e-12
Dbp	1.70213	-1.68533	0.221409	-7.6118	2.70296e-14	4.23877e-12	Hollow	YES
Chchd10	8.57513	-0.810606	0.106646	-7.60088	2.94121e-14	4.538e-12
Hpca	14.6533	-0.766722	0.10097	-7.5936	3.11135e-14	4.72432e-12
Lmo4	7.80681	1.10245	0.145347	7.58492	3.32696e-14	4.97277e-12
Fxyd6	6.66972	1.01006	0.133352	7.57441	3.60757e-14	5.30923e-12
Nrep	32.9183	-0.640036	0.0851636	-7.51537	5.67515e-14	8.22553e-12
Uqcr10	24.1406	-0.539852	0.0731201	-7.38308	1.54668e-13	2.20829e-11
Pde8b	1.96445	-1.44064	0.195447	-7.37098	1.69378e-13	2.38276e-11	Hollow	YES
Atp5e	25.1889	-0.551288	0.0751498	-7.33585	2.20314e-13	3.05439e-11
Ndufc1	19.6961	-0.623167	0.0850936	-7.32332	2.41917e-13	3.30597e-11
Ube2s	9.11381	-0.706399	0.0964973	-7.3204	2.47224e-13	3.33091e-11
Cpe	53.505	-0.536355	0.0735543	-7.29196	3.0548e-13	4.05864e-11
Nell1	1.23272	-1.95377	0.268879	-7.26638	3.69255e-13	4.83876e-11
Lsm7	8.75613	-0.707341	0.0986177	-7.17256	7.36079e-13	9.51531e-11
Rps6ka2	0.904316	-2.03775	0.285252	-7.1437	9.08499e-13	1.15876e-10
Rgs4	4.71083	1.0743	0.150524	7.13707	9.53389e-13	1.20002e-10	Septa	YES
Ckb	24.1444	-0.574801	0.0813749	-7.06361	1.62227e-12	2.01541e-10
Scrt1	3.91265	-1.03651	0.146992	-7.05146	1.77051e-12	2.17137e-10
Nfix	2.95127	-1.12541	0.159696	-7.04719	1.82562e-12	2.21061e-10
Atpif1	43.9269	-0.49292	0.0699756	-7.04417	1.86576e-12	2.21318e-10
Plxnd1	4.25815	-1.28005	0.181734	-7.04355	1.87401e-12	2.21318e-10	Hollow	YES
Tmem256	10.9639	-0.681492	0.0968737	-7.03485	1.99474e-12	2.32703e-10
Oaz1	16.487	-0.564139	0.0802763	-7.02747	2.10305e-12	2.42382e-10
Cux2	3.81046	-1.1109	0.158325	-7.01657	2.27377e-12	2.58939e-10
Uqcrb	14.4472	-0.61349	0.0875509	-7.00724	2.43064e-12	2.73547e-10
Atp5l	30.3736	-0.477132	0.0686275	-6.9525	3.58867e-12	3.99177e-10
Cnp	1.70094	-1.50639	0.217189	-6.93583	4.0385e-12	4.44049e-10
Mdh1	23.7261	-0.558801	0.0808412	-6.91233	4.76742e-12	5.1824e-10
Rpl12	18.9155	0.609123	0.0887341	6.86459	6.66811e-12	7.16709e-10
Nrxn2	4.35623	-0.923314	0.134917	-6.84358	7.72372e-12	8.20946e-10	Septa
Cox5b	32.6631	-0.490898	0.0717489	-6.8419	7.81508e-12	8.21528e-10
Ndufv3	17.5941	-0.660525	0.0966261	-6.83588	8.15013e-12	8.47436e-10
Dbi	22.7072	-0.622748	0.0913435	-6.81765	9.25409e-12	9.51878e-10
Rps19	19.9742	0.56211	0.0826361	6.80224	1.03008e-11	1.04827e-09
Snrnp70	3.27696	-1.05335	0.155541	-6.77221	1.2683e-11	1.27415e-09
Phyhip	0.682892	-2.1804	0.322018	-6.77103	1.27868e-11	1.27415e-09
Chchd2	30.4046	-0.496987	0.07395	-6.72058	1.81007e-11	1.78506e-09
Cdc42bpb	1.28285	-1.73254	0.258648	-6.69847	2.10608e-11	2.05579e-09
Cux1	4.8365	-0.93005	0.138878	-6.69691	2.12876e-11	2.05694e-09
Rplp1	61.8983	0.433173	0.0657903	6.58414	4.57537e-11	4.3768e-09
Rpl21	35.4331	-0.487656	0.0743845	-6.55588	5.5314e-11	5.23895e-09
Epha8	1.28994	-1.6367	0.249753	-6.55327	5.62914e-11	5.27925e-09
Ss18l2	5.56984	-0.831661	0.126966	-6.55029	5.74249e-11	5.33327e-09
Scn1b	5.50193	-0.929622	0.142724	-6.51342	7.34581e-11	6.75673e-09
A2ml1	1.99083	-1.26688	0.194691	-6.50715	7.6589e-11	6.97762e-09
Fau	37.4231	-0.486989	0.0751398	-6.48111	9.10505e-11	8.21688e-09
Mgst3	12.1972	-0.657629	0.101761	-6.46248	1.02998e-10	9.20822e-09
mt-Atp6	132.639	0.47094	0.0735791	6.40046	1.54913e-10	1.37212e-08
Cplx1	10.7364	-0.67125	0.105121	-6.3855	1.70836e-10	1.49929e-08
Tomm7	9.49852	-0.663983	0.104332	-6.36412	1.96411e-10	1.70806e-08
Ndufb6	12.9638	-0.582695	0.0922637	-6.31554	2.69221e-10	2.32016e-08
Cdk5r2	3.40881	-0.962204	0.152479	-6.31042	2.78283e-10	2.37684e-08
Mrps21	6.42544	-0.745983	0.118272	-6.30733	2.83892e-10	2.40329e-08
Gm10076	11.1378	0.621431	0.0988306	6.28784	3.21916e-10	2.70127e-08
Tpm3	5.51264	-0.80185	0.127571	-6.28555	3.26701e-10	2.71759e-08
Klc2	2.30251	-1.31912	0.210237	-6.27445	3.50878e-10	2.89354e-08
Cox8a	58.7419	-0.434331	0.0692736	-6.26979	3.6154e-10	2.95597e-08
Rpl10	9.75577	0.629806	0.100473	6.2684	3.64766e-10	2.95708e-08
Bola2	5.66511	-0.753694	0.120266	-6.26691	3.68273e-10	2.96042e-08
Tceal5	5.06009	-0.77331	0.124588	-6.20694	5.40251e-10	4.3067e-08
Tpt1	30.5904	0.470379	0.0761704	6.17535	6.60151e-10	5.21901e-08
Ndufa4	53.8025	-0.444174	0.0722387	-6.14871	7.81179e-10	6.06166e-08
Ccdc28b	5.50112	-0.812515	0.132166	-6.14767	7.86294e-10	6.06166e-08
Ppia	113.646	-0.372192	0.0605453	-6.14732	7.88026e-10	6.06166e-08
Mlc1	3.42311	-0.913136	0.148562	-6.14651	7.92084e-10	6.06166e-08
Ubl5	19.095	-0.515769	0.0840262	-6.1382	8.34621e-10	6.33649e-08
Prdx6	4.52206	-0.834913	0.136103	-6.13442	8.54717e-10	6.43797e-08
Ndufa11	10.4683	-0.59912	0.0978912	-6.12026	9.34201e-10	6.9817e-08
Neurod6	2.04378	1.31779	0.215427	6.11711	9.52904e-10	7.06626e-08
Lynx1	2.02373	-1.15792	0.190965	-6.06352	1.33171e-09	9.79937e-08
Usp2	1.623	-1.331	0.219683	-6.05872	1.37207e-09	1.00192e-07	Hollow	YES
Dpm3	2.90804	-0.967538	0.160836	-6.01567	1.79141e-09	1.29823e-07
Rps28	24.8987	-0.467926	0.0778366	-6.01164	1.83654e-09	1.32093e-07
Mag	0.411049	-2.40553	0.402855	-5.97121	2.35495e-09	1.68115e-07
Tppp3	3.02592	1.07465	0.180012	5.96989	2.3741e-09	1.68227e-07	Septa	YES
Ndufa7	12.3282	-0.491548	0.0825326	-5.9558	2.58799e-09	1.82035e-07
Sec11c	4.73457	-0.787357	0.132252	-5.95345	2.62554e-09	1.83328e-07
Ubc	15.513	-0.50139	0.0842791	-5.94916	2.69523e-09	1.8683e-07
Serf2	16.2499	-0.491699	0.0827723	-5.94038	2.84368e-09	1.95703e-07
Ubl7	1.84331	-1.17101	0.197395	-5.93234	2.98654e-09	2.04066e-07
Nme7	1.04922	-2.14056	0.361157	-5.92694	3.08623e-09	2.09382e-07
Rps21	39.8977	-0.443886	0.0749148	-5.92521	3.11905e-09	2.10119e-07
Atp6v0b	21.5011	-0.475511	0.0803444	-5.91841	3.2507e-09	2.17456e-07
Ndrg2	7.19301	-0.714525	0.120884	-5.91082	3.404e-09	2.2613e-07
Lancl1	3.89347	-0.813082	0.13767	-5.90601	3.50497e-09	2.31232e-07
Cacna1e	2.60614	-1.05815	0.180146	-5.87385	4.25797e-09	2.78984e-07
Mapt	13.7677	0.567694	0.0967007	5.87063	4.34148e-09	2.82521e-07
Dynlt1a	1.23586	-1.66905	0.284514	-5.86634	4.45518e-09	2.87961e-07
Atp5g1	17.7323	-0.454798	0.0775561	-5.86412	4.51534e-09	2.89891e-07
Igfbp2	3.52006	-0.878046	0.15044	-5.83653	5.32986e-09	3.38478e-07
Lgi3	2.10523	-1.09448	0.187536	-5.83612	5.3429e-09	3.38478e-07
Bcl11a	4.24878	-0.795108	0.13641	-5.82882	5.58223e-09	3.51313e-07
Btbd3	1.56366	-1.48919	0.255918	-5.81901	5.91966e-09	3.70114e-07	Hollow	YES
Dio2	0.962892	-1.62632	0.280333	-5.80139	6.57669e-09	4.04132e-07
Atp5g3	14.5718	-0.492902	0.0849655	-5.80119	6.58443e-09	4.04132e-07
Ndufa2	13.0234	-0.563615	0.0971577	-5.80104	6.59048e-09	4.04132e-07
Bsg	15.817	-0.513221	0.0886466	-5.78952	7.05877e-09	4.28101e-07
Snhg11	23.1964	-0.495254	0.0855474	-5.78923	7.07087e-09	4.28101e-07
Prrc2a	2.19774	-1.02722	0.177986	-5.77135	7.86406e-09	4.73129e-07
Tmsb4x	110.013	0.365245	0.0634429	5.75706	8.55914e-09	5.1173e-07
Sirt2	3.22421	-0.880648	0.153214	-5.74784	9.03887e-09	5.37055e-07
Ncald	7.59987	0.625062	0.109212	5.7234	1.04416e-08	6.16453e-07	Septa	YES
Ikbkb	2.0241	-1.12802	0.197124	-5.72238	1.05041e-08	6.16453e-07
Ttyh1	8.77085	-0.579385	0.101521	-5.70704	1.14959e-08	6.70545e-07
Tmem242	2.32768	-1.02006	0.178822	-5.70432	1.16807e-08	6.77195e-07
Gucy1b1	6.46154	0.758899	0.133106	5.70149	1.18768e-08	6.84418e-07
Cckbr	0.474626	-2.2152	0.389318	-5.68996	1.27072e-08	7.27885e-07
Ndufc2	11.4208	-0.539438	0.0948321	-5.68835	1.28272e-08	7.30385e-07
Rgs3	1.65559	-1.19287	0.21026	-5.67331	1.40065e-08	7.9282e-07
Pkia	9.23726	0.61053	0.107738	5.66683	1.45463e-08	8.18528e-07	Septa	YES
Cadm4	7.35902	-0.678745	0.120231	-5.64534	1.64853e-08	9.22211e-07
Rgs7bp	1.84711	-1.30579	0.231895	-5.63092	1.79247e-08	9.96905e-07
Dpysl3	13.2358	0.526849	0.0936655	5.6248	1.85727e-08	1.02698e-06	Septa
Gm5914	1.92034	-1.09213	0.194247	-5.62238	1.88343e-08	1.03545e-06
Atox1	10.9261	-0.539664	0.0966194	-5.58546	2.33081e-08	1.27409e-06
Nop10	9.67055	-0.575216	0.103004	-5.5844	2.34507e-08	1.2746e-06
Tuba4a	7.89931	-0.618101	0.110746	-5.58123	2.38828e-08	1.29075e-06
Barx2	0.675062	-1.7536	0.314821	-5.57015	2.54514e-08	1.3678e-06	Hollow	YES
Rasd2	1.34413	-1.40602	0.253177	-5.5535	2.80009e-08	1.49641e-06	Hollow	YES
mt-Co2	62.0697	0.423827	0.0764688	5.54248	2.98219e-08	1.58487e-06
Shld1	0.852109	-1.65319	0.298687	-5.53485	3.11494e-08	1.64627e-06
Cox20	2.96952	-0.905201	0.163579	-5.53372	3.13512e-08	1.64783e-06
Tmem240	2.49843	-0.944875	0.170912	-5.52844	3.23091e-08	1.6889e-06
Snrpg	8.54	-0.570494	0.103446	-5.51487	3.49044e-08	1.81465e-06
Atp5d	15.8623	-0.489323	0.0890467	-5.49513	3.90424e-08	2.01881e-06
Gm27032	2.11709	-1.0076	0.183961	-5.47722	4.32065e-08	2.22212e-06
Mobp	0.441345	-2.26516	0.413854	-5.47333	4.41663e-08	2.25933e-06
Zfp467	0.727112	-1.6942	0.310015	-5.46489	4.63185e-08	2.3494e-06
Hras	7.90206	-0.577569	0.105695	-5.46451	4.64183e-08	2.3494e-06
Kcnip2	5.92287	-0.64269	0.117827	-5.45453	4.91018e-08	2.47215e-06
Gpm6a	38.0216	0.404648	0.0742179	5.45217	4.97586e-08	2.4921e-06	Septa
Pamr1	1.43185	-1.26233	0.232532	-5.42864	5.67862e-08	2.82926e-06	Hollow	YES
Kcnk1	1.73619	-1.16107	0.214012	-5.42525	5.78729e-08	2.86846e-06
Car7	0.695354	-1.76972	0.32806	-5.39449	6.87188e-08	3.38847e-06
Elob	26.886	-0.380811	0.0706948	-5.38669	7.17664e-08	3.5206e-06
Smdt1	13.9803	-0.467761	0.0869394	-5.38031	7.43584e-08	3.62914e-06
Cwc22	1.24158	1.45631	0.271876	5.35654	8.48304e-08	4.11923e-06
Ncdn	23.9966	-0.476939	0.0891067	-5.35245	8.67724e-08	4.19225e-06
Atp2b2	13.8793	-0.500812	0.0936306	-5.34881	8.85359e-08	4.25595e-06
Pmm1	7.00287	-0.585413	0.109549	-5.34383	9.10026e-08	4.35265e-06
Fkbp3	10.7762	-0.523329	0.0982157	-5.32836	9.91017e-08	4.71645e-06
Cyp46a1	3.64453	-0.796556	0.150022	-5.3096	1.09865e-07	5.18508e-06
Srp9	4.02222	-0.767449	0.144565	-5.30866	1.10434e-07	5.18508e-06
Rps27a	34.0196	-0.398923	0.0751489	-5.30843	1.10575e-07	5.18508e-06
Smim26	3.43946	-0.822912	0.155266	-5.3	1.15801e-07	5.40366e-06
Tsc22d1	12.3359	-0.484551	0.0916003	-5.28984	1.22422e-07	5.6849e-06
Sparc	6.56583	-0.699034	0.132545	-5.27394	1.33522e-07	6.17041e-06
Fndc5	2.09723	-0.973468	0.1849	-5.26485	1.40305e-07	6.45266e-06
Tnk2	1.46555	-1.16153	0.220766	-5.26137	1.42983e-07	6.52632e-06
Rtraf	5.59041	-0.662921	0.126006	-5.261	1.43271e-07	6.52632e-06
Cox4i1	50.6229	-0.366458	0.0699914	-5.23576	1.64309e-07	7.44919e-06
Gng13	4.94046	-0.742992	0.142117	-5.22802	1.71336e-07	7.73115e-06
Trim9	7.84892	-0.69125	0.132267	-5.22619	1.7304e-07	7.77135e-06
Rpl35	21.6882	-0.414382	0.0793081	-5.22497	1.74188e-07	7.78636e-06
Ppdpf	6.48623	-0.564273	0.108044	-5.22263	1.76399e-07	7.84852e-06
Dapk2	0.74129	-1.63456	0.313211	-5.21871	1.80173e-07	7.97935e-06	Hollow	YES
1500026H17Rik	1.50191	-1.17373	0.225015	-5.21622	1.82609e-07	8.04995e-06
Stub1	5.78106	-0.593293	0.114011	-5.20383	1.95223e-07	8.56652e-06
Atp5c1	13.8973	-0.445512	0.0856364	-5.20237	1.9676e-07	8.59457e-06
Banp	2.09263	-1.04484	0.200883	-5.20126	1.97946e-07	8.60705e-06
Postn	0.70196	1.63933	0.315266	5.19983	1.99474e-07	8.61898e-06
Ntsr2	0.949731	-1.4998	0.288461	-5.19932	2.00022e-07	8.61898e-06
S100b	1.15992	-1.30717	0.251956	-5.18808	2.12473e-07	9.11441e-06
Lypd6	1.16437	1.45459	0.281437	5.16844	2.36055e-07	1.00808e-05
Myl12b	19.3837	-0.475851	0.0922378	-5.15896	2.48332e-07	1.05257e-05
Camkv	12.8374	-0.484613	0.093941	-5.1587	2.48672e-07	1.05257e-05
Eno2	8.35225	-0.541498	0.104997	-5.15727	2.50582e-07	1.05598e-05
Npas2	0.652371	-1.64028	0.318171	-5.15535	2.53164e-07	1.06218e-05	Hollow	YES
Gm10260	2.28224	1.00528	0.195326	5.14669	2.65116e-07	1.10747e-05
Chgb	10.1334	-0.575219	0.111787	-5.14566	2.66586e-07	1.10876e-05
Gabrd	1.17863	-1.34319	0.261464	-5.13718	2.78887e-07	1.15491e-05
Uqcrc1	7.72367	-0.588474	0.11485	-5.12386	2.99344e-07	1.23428e-05
Micos10	12.0307	-0.493943	0.0965523	-5.11581	3.12397e-07	1.28257e-05
C1qa	0.779344	-1.57767	0.308696	-5.11077	3.20844e-07	1.31162e-05
Cerk	1.35137	-1.21425	0.238114	-5.09945	3.40638e-07	1.38661e-05
Dpysl5	9.89253	0.545375	0.107023	5.09587	3.47134e-07	1.40707e-05	Septa
Brinp1	10.5378	-0.570849	0.112236	-5.08617	3.65363e-07	1.47471e-05	Hollow
1500015A07Rik	0.642893	-1.6264	0.320139	-5.08031	3.76829e-07	1.5146e-05
Pop5	1.98567	-0.946654	0.186369	-5.07945	3.7853e-07	1.51507e-05
Gpr162	5.71538	-0.629848	0.124045	-5.07758	3.82269e-07	1.52366e-05
Bcan	5.9401	-0.698516	0.137639	-5.07497	3.87557e-07	1.53833e-05
Ccng1	1.69518	-1.03794	0.205071	-5.06135	4.16306e-07	1.64561e-05
Adcy1	25.131	-0.424524	0.0839586	-5.05635	4.2736e-07	1.68236e-05
Scg2	3.5058	0.888888	0.176322	5.04127	4.62443e-07	1.81301e-05
Inka2	1.10643	-1.36216	0.270496	-5.0358	4.75852e-07	1.85796e-05
Uba52	15.6401	-0.505734	0.100597	-5.02731	4.97401e-07	1.9342e-05
Cnih3	2.93836	-0.956933	0.190478	-5.02384	5.06475e-07	1.95844e-05	Hollow
Slc25a3	17.1042	-0.404425	0.0805086	-5.02337	5.0773e-07	1.95844e-05
Dact2	1.44328	-1.14426	0.228121	-5.016	5.27583e-07	2.02685e-05
Sst	5.8181	0.815283	0.16314	4.99745	5.80924e-07	2.22285e-05
Emc4	9.22185	-0.535938	0.107296	-4.99494	5.88544e-07	2.24303e-05
mt-Nd1	38.7669	0.421718	0.084677	4.98032	6.34805e-07	2.40974e-05
Sort1	4.17957	-0.662604	0.133126	-4.97726	6.44917e-07	2.42893e-05
Hspe1	10.6224	-0.524034	0.105286	-4.97725	6.44938e-07	2.42893e-05
Tceal3	4.12217	-0.665699	0.133775	-4.97626	6.48232e-07	2.43176e-05
Slc25a18	1.83618	-1.00275	0.201623	-4.97342	6.57827e-07	2.45812e-05
1110008P14Rik	9.64172	-0.477348	0.0961479	-4.96472	6.87992e-07	2.56083e-05
R3hdm4	6.49092	-0.582669	0.117417	-4.96239	6.96312e-07	2.57973e-05
Park7	8.15093	-0.515652	0.103925	-4.96179	6.98465e-07	2.57973e-05
Hspa12a	3.54496	-0.714159	0.144122	-4.95523	7.22459e-07	2.65809e-05
Ppme1	1.39144	-1.14222	0.230634	-4.95252	7.32586e-07	2.68503e-05
Pkm	14.3788	-0.484144	0.0979324	-4.94366	7.66708e-07	2.79936e-05
Isoc1	1.21215	1.33821	0.271217	4.9341	8.05226e-07	2.92625e-05
Fxyd7	14.9994	-0.454075	0.0920386	-4.93353	8.07579e-07	2.92625e-05
Slc25a4	32.2935	-0.357455	0.0725308	-4.92832	8.29415e-07	2.99403e-05
Glul	4.35168	-0.691813	0.140433	-4.92629	8.38053e-07	3.01384e-05
Slc32a1	2.17088	-1.05075	0.213497	-4.92163	8.58257e-07	3.07494e-05
AC149090.1	6.63505	-0.578392	0.117589	-4.91874	8.71037e-07	3.10908e-05
Dnajc19	4.27111	-0.700489	0.142487	-4.91616	8.82593e-07	3.13862e-05
Rps9	18.988	0.414569	0.0844204	4.91077	9.0721e-07	3.21421e-05
Ewsr1	6.50321	-0.600635	0.122618	-4.89842	9.66117e-07	3.41029e-05
Snrpd1	6.76153	-0.543883	0.111082	-4.89624	9.76876e-07	3.43559e-05
Rpl30	21.5476	-0.401617	0.0820963	-4.89203	9.98025e-07	3.49711e-05
Tenm1	1.60782	1.20899	0.247431	4.88615	1.02825e-06	3.58987e-05	Septa	YES
Dnajb5	2.23156	-0.875892	0.179485	-4.88004	1.06066e-06	3.68955e-05
Rps25	15.5581	0.42286	0.0867737	4.87314	1.09839e-06	3.80696e-05
Hist1h2bc	1.59658	-1.19423	0.24512	-4.872	1.10475e-06	3.81516e-05
Ndufa6	16.8232	-0.393223	0.080821	-4.86536	1.14251e-06	3.93137e-05
Mfsd4a	1.01025	-1.32376	0.272752	-4.85336	1.21385e-06	4.1619e-05
Romo1	10.8288	-0.478868	0.0987456	-4.84951	1.23767e-06	4.22841e-05
Baalc	2.1833	-0.945446	0.195089	-4.84622	1.25835e-06	4.28376e-05
Them6	0.483759	-1.71369	0.354883	-4.8289	1.37288e-06	4.65707e-05
Dcdc2a	1.42831	-1.11896	0.231923	-4.82471	1.40208e-06	4.73932e-05
Map1b	26.3181	0.382693	0.0793832	4.82083	1.42961e-06	4.81536e-05	Septa
Afap1	1.96168	-0.926724	0.192364	-4.81755	1.45328e-06	4.87793e-05
Nol7	5.66048	-0.561374	0.116557	-4.81633	1.46225e-06	4.89086e-05
Uqcc2	10.9517	-0.440161	0.0918343	-4.79299	1.6431e-06	5.47663e-05
Cox7b	21.0279	-0.387166	0.0808599	-4.78811	1.68363e-06	5.58785e-05
Gde1	14.9303	-0.401386	0.0838393	-4.78757	1.68816e-06	5.58785e-05
Ftl1	43.9317	0.341656	0.0715759	4.77333	1.81203e-06	5.97718e-05
Zbtb34	2.48051	-0.846091	0.177362	-4.77043	1.83836e-06	6.04322e-05
Bcl6	0.607209	-1.51769	0.320703	-4.73237	2.21909e-06	7.26979e-05
S100a16	2.2971	-0.830746	0.175655	-4.72941	2.25168e-06	7.3514e-05
Ttr	36.5052	-1.00063	0.211694	-4.72679	2.28093e-06	7.42156e-05
Nr1d1	1.66492	-0.970737	0.205416	-4.72572	2.29304e-06	7.43567e-05	Hollow	YES
Ndufb11	9.88202	-0.483858	0.102409	-4.72475	2.30404e-06	7.44609e-05
Grm4	1.21302	-1.20974	0.256206	-4.72174	2.3384e-06	7.5317e-05	Hollow	YES
Rpl37a	22.8125	0.361939	0.076817	4.7117	2.45653e-06	7.88564e-05
Hint1	30.5098	-0.367909	0.078123	-4.70936	2.48498e-06	7.95028e-05
Rasl10a	2.22377	-0.869241	0.18463	-4.70802	2.5014e-06	7.97614e-05	Hollow	YES
Tpi1	11.5994	-0.464836	0.0990806	-4.6915	2.71215e-06	8.6194e-05
Crtac1	1.67976	-0.962312	0.205217	-4.68925	2.74209e-06	8.6857e-05
Emc6	7.75157	-0.509873	0.109055	-4.67535	2.9345e-06	9.24945e-05
Fabp7	17.7963	0.463116	0.0990729	4.6745	2.94675e-06	9.24945e-05
Nrsn1	8.18297	-0.555812	0.118907	-4.67434	2.94907e-06	9.24945e-05
Crmp1	26.6032	0.364161	0.0779422	4.67219	2.98003e-06	9.316e-05	Septa
Plxna4	1.99094	-0.920449	0.19713	-4.66925	3.02297e-06	9.41946e-05
Gm15417	0.434383	-1.69392	0.362855	-4.66833	3.03663e-06	9.43131e-05
Kalrn	4.94716	-0.609522	0.130741	-4.66206	3.1306e-06	9.6917e-05
Gpm6b	21.5306	-0.384374	0.0824984	-4.65916	3.17497e-06	9.79735e-05
Ndufb10	6.38814	-0.538385	0.116047	-4.63938	3.49464e-06	0.000107491
Kcnab3	0.704052	-1.46611	0.316421	-4.63342	3.59682e-06	0.000110279
Rab5if	5.35086	-0.572609	0.123683	-4.62964	3.66302e-06	0.00011195
Rpl35a	22.4651	-0.36028	0.0778354	-4.62874	3.67892e-06	0.000112078
Prr7	2.1475	-0.857291	0.185366	-4.62485	3.74868e-06	0.000113841
Cck	13.4767	0.513241	0.111231	4.61418	3.94654e-06	0.00011947
6330403K07Rik	8.94974	0.50414	0.109712	4.59511	4.32511e-06	0.000130517
Ppp1r1b	0.511379	-1.70255	0.370601	-4.59401	4.34801e-06	0.000130796
Pacs2	6.583	-0.576413	0.125582	-4.58995	4.43356e-06	0.000132951
Ube2m	9.0605	-0.497511	0.108528	-4.58416	4.55821e-06	0.000136262
Cox6a2	0.838281	-1.37711	0.3006	-4.58121	4.62302e-06	0.000137769
C1qtnf4	13.2541	-0.499054	0.109466	-4.55899	5.14003e-06	0.000152565
Ndufs5	15.4243	-0.374993	0.082262	-4.55852	5.15143e-06	0.000152565
Uqcrh	18.0335	-0.381931	0.0840659	-4.54323	5.53984e-06	0.000163562
Ypel3	13.8422	-0.463907	0.10214	-4.54189	5.57509e-06	0.000164096
Grin1	9.9302	-0.466078	0.102972	-4.52628	6.00309e-06	0.000176152
Glrx	2.42388	-0.836054	0.184804	-4.524	6.06812e-06	0.000177516
Calm3	30.1922	0.357414	0.0792204	4.51164	6.43279e-06	0.00018761
Itm2b	14.9124	-0.417736	0.0927618	-4.50332	6.68988e-06	0.000194515
Tubb2b	36.9221	0.370727	0.0823569	4.50146	6.74872e-06	0.000195452	Septa
Ier5	1.61136	-0.991258	0.22023	-4.50101	6.76298e-06	0.000195452	Hollow	YES
Cyc1	8.01282	-0.470759	0.104753	-4.494	6.98975e-06	0.000201397
Pigyl	2.31144	-0.779878	0.173694	-4.48994	7.12426e-06	0.000204657
Irak1bp1	2.46152	-0.760172	0.16937	-4.48822	7.18202e-06	0.000205698
Vstm2b	2.46087	-0.817806	0.182269	-4.48682	7.22947e-06	0.000205972
Rac3	15.018	0.419053	0.0933997	4.48667	7.23464e-06	0.000205972	Septa
Nudt4	13.4419	0.43556	0.0971109	4.48518	7.28522e-06	0.000206797
Acaa1a	2.23197	-0.834082	0.18601	-4.48407	7.32321e-06	0.00020726
Cuedc1	1.39561	-1.01691	0.226937	-4.481	7.42924e-06	0.000209495
Eif1b	7.66334	-0.466483	0.104113	-4.48052	7.44599e-06	0.000209495
1500004A13Rik	1.98254	-0.849032	0.189526	-4.47978	7.47213e-06	0.000209614
Fkbp2	4.42157	-0.597226	0.133341	-4.47895	7.50127e-06	0.000209816
Nceh1	2.09675	-0.835801	0.186704	-4.4766	7.58418e-06	0.000211517
Ndufb4	11.8932	-0.41603	0.0929572	-4.47551	7.62304e-06	0.000211982
Mrps26	4.68408	-0.592214	0.132366	-4.47408	7.67399e-06	0.000212781
Ssr4	4.55	-0.578759	0.129407	-4.47238	7.73531e-06	0.000213861
Mapk6	3.47472	-0.666167	0.149247	-4.46351	8.06265e-06	0.000222269
Tyrobp	1.07099	-1.13817	0.255068	-4.4622	8.11213e-06	0.00022299
Nenf	10.2671	-0.431615	0.0967572	-4.4608	8.16539e-06	0.000223444
Pgk1	8.92339	-0.466358	0.104552	-4.46054	8.17536e-06	0.000223444
Pcdh10	3.45412	0.687772	0.154257	4.4586	8.24977e-06	0.000224836
Nefm	3.26257	-0.795231	0.178732	-4.44929	8.6155e-06	0.000234136
Tmem145	2.74422	-0.714933	0.160855	-4.44458	8.80627e-06	0.000238299
Mapre2	8.84122	0.527313	0.11865	4.44428	8.81852e-06	0.000238299
Rpl36	22.8262	-0.368179	0.0828714	-4.44278	8.88055e-06	0.0002393
Egr1	2.82219	-0.761612	0.171513	-4.44055	8.97275e-06	0.000241105
Mpc2	8.64497	-0.502504	0.11346	-4.42893	9.47038e-06	0.000253764
Cldn10	1.51424	-1.11141	0.251161	-4.42508	9.64086e-06	0.00025761
Micos13	5.91758	-0.509126	0.115157	-4.42116	9.81737e-06	0.000261596
Kitl	2.5897	-0.907601	0.205411	-4.41845	9.9409e-06	0.000263374	Hollow	YES
Hypk	3.83075	-0.622988	0.141013	-4.41795	9.96404e-06	0.000263374
Rps23	24.5623	0.364281	0.0824559	4.41789	9.96671e-06	0.000263374
Atp5h	15.9703	-0.358114	0.0810723	-4.41722	9.99803e-06	0.000263474
Coq7	2.61097	-0.790718	0.179266	-4.41085	1.02963e-05	0.00027059
Bhlhe22	4.29933	-0.661873	0.150178	-4.40725	1.0469e-05	0.000274374
Pcdh17	0.722769	1.34486	0.305266	4.40552	1.0553e-05	0.00027582
Gm2a	1.62181	-0.925288	0.210293	-4.39998	1.08259e-05	0.000281674
Anapc13	3.93849	-0.642915	0.146126	-4.39974	1.0838e-05	0.000281674
Mrps33	8.59096	-0.469212	0.106659	-4.3992	1.08653e-05	0.000281674
Nkain2	0.909468	1.28777	0.29282	4.39781	1.09347e-05	0.000282706
Eno1	6.58919	-0.520612	0.118494	-4.39357	1.11503e-05	0.000287503
Arhgef9	2.72506	-0.709208	0.16146	-4.39246	1.12075e-05	0.000288202
Dnajb2	1.44048	-0.987304	0.224908	-4.3898	1.13454e-05	0.000290534
Cxcl14	1.80703	-1.14227	0.260226	-4.38954	1.1359e-05	0.000290534
C030013G03Rik	0.349264	-1.86815	0.426504	-4.38016	1.18594e-05	0.000302526
Ppp3r1	13.0365	-0.446149	0.101881	-4.37911	1.19164e-05	0.000303171
Zfp706	8.92282	-0.466954	0.106694	-4.37657	1.20559e-05	0.000305907
Gnb4	4.39866	0.645917	0.14762	4.37554	1.21133e-05	0.00030655
Ndufs6	10.2998	-0.419165	0.0958333	-4.3739	1.22046e-05	0.000308047
Nrgn	122.163	0.321215	0.0735146	4.3694	1.24586e-05	0.000313628
Sipa1	0.744885	-1.35666	0.311113	-4.36067	1.29662e-05	0.00032555
Kat6a	1.07021	-1.16407	0.267262	-4.35555	1.32733e-05	0.000332388
Atp6v0e2	11.8821	-0.452211	0.103981	-4.34897	1.3678e-05	0.000341629
Slc25a5	10.293	-0.479825	0.110476	-4.34324	1.40394e-05	0.000348984
C1qc	0.816627	-1.32861	0.305909	-4.34315	1.40455e-05	0.000348984
Matn4	0.505769	-1.67254	0.385302	-4.34085	1.41934e-05	0.000351209
Idh3b	5.50457	-0.549166	0.126518	-4.34062	1.42084e-05	0.000351209
Gm42067	0.845009	-1.21239	0.279468	-4.3382	1.43655e-05	0.000354176
Myl12a	1.12857	-1.0935	0.252254	-4.33491	1.45818e-05	0.000358585
Rnf25	1.11125	-1.10526	0.25513	-4.33213	1.47672e-05	0.000362214
Tmem259	3.51787	-0.645015	0.149064	-4.32711	1.51081e-05	0.000369014
Pcp4l1	0.460661	-1.53302	0.3543	-4.32691	1.51216e-05	0.000369014
Ddn	4.85529	0.627674	0.145274	4.32062	1.55594e-05	0.00037873
Acsbg1	3.11971	-0.677349	0.156822	-4.31922	1.56583e-05	0.00038017
Mtpn	10.232	0.416623	0.0965526	4.31498	1.59614e-05	0.000386549
Pam16	4.2304	-0.611164	0.141735	-4.31201	1.61774e-05	0.000390791
Ndufa12	10.8423	-0.448299	0.103981	-4.31136	1.62251e-05	0.000390955
Kpna6	1.236	-1.03976	0.241485	-4.3057	1.66456e-05	0.00040008
Tmeff2	1.00203	1.17065	0.272007	4.30374	1.67937e-05	0.000402627
Rpl36al	12.0633	-0.415308	0.0968454	-4.28836	1.79996e-05	0.00043046
Trpt1	0.791331	-1.30071	0.303479	-4.28601	1.8191e-05	0.000433953
Bdh1	6.35974	-0.475454	0.111325	-4.27085	1.94729e-05	0.00046245
Neto2	2.90816	0.784967	0.183805	4.27066	1.94898e-05	0.00046245
Parm1	0.992371	1.17693	0.275616	4.27019	1.95306e-05	0.00046245
Ppp1r16b	1.34914	-0.996295	0.23392	-4.25913	2.0522e-05	0.000484724
Tbca	10.5986	-0.399669	0.0940191	-4.25093	2.12884e-05	0.000501588
Ntrk2	5.91091	-0.501758	0.118213	-4.24451	2.19069e-05	0.000514893
Pantr1	17.8122	-0.517808	0.122054	-4.24244	2.21102e-05	0.000518396
Nefh	0.632455	-1.38813	0.328554	-4.22495	2.38993e-05	0.000558974
Myl6	22.6848	-0.341123	0.0808116	-4.22121	2.42996e-05	0.000566952
Rps14	22.7999	0.34194	0.0810264	4.2201	2.4419e-05	0.000567415
Fcor	1.27318	-1.01894	0.24146	-4.21993	2.44381e-05	0.000567415
Polr2i	5.71386	-0.517069	0.122547	-4.21936	2.44999e-05	0.000567471
Rps27	17.1104	0.350042	0.0829816	4.21831	2.46142e-05	0.000568743
Sun1	1.48037	-0.9292	0.220414	-4.2157	2.49004e-05	0.00057397
Slc43a2	0.909795	-1.24843	0.296396	-4.21205	2.53067e-05	0.000580968
Pomp	8.66633	-0.431306	0.102402	-4.21188	2.53255e-05	0.000580968
Krtcap2	4.99786	-0.581481	0.138176	-4.20827	2.57332e-05	0.000588909
Pin1	7.53902	-0.467651	0.111165	-4.20683	2.58981e-05	0.000589935
Tst	1.13235	-1.04895	0.249346	-4.2068	2.59014e-05	0.000589935
Acap3	4.27002	-0.570073	0.136082	-4.18917	2.79971e-05	0.000636153
Pllp	0.654501	-1.36727	0.32743	-4.17576	2.96989e-05	0.000673222
Edil3	1.79425	0.994427	0.238257	4.17376	2.99618e-05	0.000677575
Mark3	3.95574	-0.610317	0.146297	-4.17177	3.02246e-05	0.000681906
Kcns1	0.580944	-1.37599	0.329894	-4.17101	3.03257e-05	0.000682579
Tiam1	1.94658	-0.825744	0.198509	-4.15974	3.18611e-05	0.000715274
Arl6ip5	5.16751	-0.534051	0.1284	-4.15926	3.19279e-05	0.000715274
Uck2	1.15579	-1.03112	0.248103	-4.156	3.23861e-05	0.000723844
Lamtor4	6.77089	-0.48068	0.115681	-4.15522	3.24969e-05	0.000724628
Ift20	5.46324	-0.559564	0.134769	-4.15202	3.29561e-05	0.000733157
Timm10b	5.38205	-0.497331	0.119886	-4.14837	3.34851e-05	0.000742078
Per3	0.742318	-1.359	0.327613	-4.14818	3.35122e-05	0.000742078	Hollow	YES
Map2	12.4798	0.36233	0.0875933	4.1365	3.52644e-05	0.000779075
Necab1	5.47671	0.52241	0.126325	4.13545	3.54254e-05	0.000780829
Atp5o	14.5088	-0.360446	0.0873382	-4.12701	3.67503e-05	0.000808168
Mcrip1	6.33211	-0.454975	0.110267	-4.12612	3.68937e-05	0.000809461
Snrpa1	2.12147	-0.756873	0.183556	-4.12338	3.73352e-05	0.000817274
Gps2	0.806079	-1.19701	0.290576	-4.11945	3.7977e-05	0.000829424
Rab24	2.72428	-0.677385	0.164462	-4.11878	3.80882e-05	0.000829959
Camkk2	4.93665	-0.553324	0.134382	-4.11754	3.82937e-05	0.00083254
Marcksl1	28.1691	0.316241	0.0769844	4.10786	3.99337e-05	0.000866225
Pcdh19	1.69123	1.0684	0.260369	4.1034	4.07124e-05	0.00088112	Septa	YES
Gucy1a1	3.24866	0.728974	0.177913	4.09736	4.17882e-05	0.000902361
Ctsl	5.56887	-0.498874	0.12221	-4.0821	4.463e-05	0.000961554
Mthfsl	1.68561	-0.850804	0.208553	-4.07956	4.51217e-05	0.000969463
Epop	0.535471	-1.3763	0.337398	-4.07915	4.51997e-05	0.000969463
Tmem223	5.20997	-0.525102	0.12895	-4.07213	4.65859e-05	0.000996959
Tpm1	3.71238	-0.573857	0.14099	-4.07019	4.6975e-05	0.00100304
Rps12	26.0849	0.276047	0.0679086	4.06498	4.8037e-05	0.00102343
Cuedc2	6.61444	-0.478343	0.11823	-4.04588	5.21263e-05	0.00110809
Rpl24	18.9406	-0.337452	0.0834404	-4.04423	5.24944e-05	0.00111344
Actb	35.3241	-0.379509	0.0939786	-4.03825	5.38515e-05	0.00113876
Plch2	0.544766	-1.39994	0.346697	-4.03792	5.39263e-05	0.00113876
Uchl1	43.1139	0.298519	0.0740367	4.03204	5.52958e-05	0.00116511
Ctxn1	22.1708	-0.341228	0.0847137	-4.02802	5.62486e-05	0.00118258
Smpd1	3.30677	-0.600394	0.149085	-4.02719	5.64481e-05	0.00118417
Dazap1	1.82458	-0.801048	0.199035	-4.02466	5.7057e-05	0.00119433
Ddit4	1.3084	-0.949623	0.236175	-4.02084	5.79908e-05	0.00121122
Eif3j2	0.870503	-1.10398	0.274899	-4.01594	5.92093e-05	0.00123398
C1qb	0.952835	-1.09784	0.273443	-4.01486	5.948e-05	0.00123692
Slc6a8	1.04816	-1.04881	0.261305	-4.01373	5.97663e-05	0.00124018
Csrp1	0.663961	-1.24556	0.310619	-4.00991	6.07414e-05	0.00125769
Mpc1	12.6712	-0.372466	0.092957	-4.00687	6.15289e-05	0.00127124
Rgl1	1.67336	-0.814712	0.204097	-3.9918	6.5575e-05	0.00135192
Smim27	0.734943	-1.22036	0.306067	-3.98722	6.68526e-05	0.00137529
Atp1a2	5.71615	-0.515498	0.129307	-3.98662	6.70221e-05	0.00137582
Dcbld2	1.4339	-0.9455	0.237386	-3.98296	6.80635e-05	0.00139421
Selenow	92.2581	-0.264318	0.0665119	-3.97399	7.06787e-05	0.00144468
Mrpl42	4.85975	-0.556592	0.140208	-3.96975	7.19471e-05	0.00146748
Drap1	4.784	-0.510744	0.128714	-3.96806	7.24615e-05	0.00147482
Gpt2	1.18664	-0.957771	0.242276	-3.95323	7.7104e-05	0.00156598
Snx7	1.64515	0.879543	0.22291	3.94574	7.95537e-05	0.00161231
Brd9	3.20461	-0.643972	0.163276	-3.94408	8.01074e-05	0.0016201
Cnnm1	1.10737	-1.01485	0.257525	-3.94079	8.12123e-05	0.00163792
Dctn2	12.1123	-0.329439	0.0836046	-3.94044	8.13309e-05	0.00163792
Abhd8	5.7471	-0.472643	0.12005	-3.93706	8.24849e-05	0.00165767
Fabp3	18.1163	-0.328064	0.0833576	-3.93563	8.29801e-05	0.00166413
Manf	3.52586	-0.577833	0.146952	-3.93212	8.41987e-05	0.00168503
Ndufaf2	2.61272	-0.654519	0.166546	-3.92996	8.49585e-05	0.00169669
Slc35e3	0.572202	-1.3959	0.355268	-3.92914	8.52508e-05	0.00169898
Pgm1	0.844558	-1.14743	0.292229	-3.92646	8.62053e-05	0.00171443
Prkca	1.51	-0.864551	0.220359	-3.92337	8.73198e-05	0.00173299
Mtch2	6.6555	-0.481322	0.12271	-3.92244	8.76558e-05	0.00173606
E2f4	1.23276	-1.02368	0.261022	-3.92181	8.78856e-05	0.00173617
Eef1a2	9.90786	-0.377678	0.0963112	-3.92143	8.80243e-05	0.00173617
Psmb5	7.01812	-0.409266	0.10441	-3.9198	8.86215e-05	0.00174435
Nedd8	17.8844	-0.299546	0.0764637	-3.91749	8.94745e-05	0.00175752
Rpl13a	26.2166	0.310892	0.0793857	3.91622	8.99496e-05	0.00176323
Usp50	0.655527	-1.26292	0.323043	-3.90945	9.25056e-05	0.00180963
Hopx	0.645524	-1.27821	0.327075	-3.90801	9.306e-05	0.00181351
Vegfb	4.24091	-0.531644	0.136042	-3.90795	9.30831e-05	0.00181351
Miat	9.00696	-0.445815	0.114176	-3.90462	9.43722e-05	0.00183489
Bri3	7.27843	-0.426585	0.109341	-3.90142	9.56292e-05	0.00185556
Pacsin3	0.505438	-1.33884	0.343261	-3.90036	9.60509e-05	0.00185996
Klhl18	1.1686	-1.00312	0.257232	-3.89966	9.63296e-05	0.00186159
Hs3st2	2.06811	0.837204	0.214927	3.8953	9.8079e-05	0.00188841
Chpt1	0.547149	-1.32786	0.340896	-3.89521	9.8112e-05	0.00188841
Fuom	1.12371	-0.993856	0.255602	-3.8883	0.000100948	0.00193909
Minar1	1.5369	-0.855733	0.22055	-3.87999	0.000104461	0.00200255	Hollow	YES
Wbp1	1.74419	-0.841296	0.217248	-3.87251	0.00010772	0.00206091
Rnf8	1.17679	-0.933035	0.241006	-3.87142	0.000108205	0.00206233
Aars2	0.844844	-1.12132	0.289644	-3.87137	0.000108226	0.00206233
Gm21887	0.35619	-1.90742	0.492826	-3.87037	0.000108672	0.00206671
Wdr6	4.94964	0.494001	0.127762	3.86658	0.000110372	0.00209487
AW047730	1.76787	-0.776146	0.200886	-3.86362	0.000111718	0.00211622
Ndufs7	6.51143	-0.451843	0.117043	-3.86049	0.00011316	0.0021393
Cox17	3.63319	-0.597663	0.155005	-3.85577	0.000115366	0.0021767
Sept8	2.30318	-0.696701	0.180926	-3.85074	0.000117761	0.00221501
Gabarapl2	8.95602	-0.398211	0.103417	-3.85054	0.000117859	0.00221501
Cxadr	12.4741	0.361068	0.0938633	3.84674	0.000119697	0.00224515
Plxna1	5.63153	0.478245	0.124379	3.84505	0.00012053	0.00225635
Mcrip2	0.94311	-1.04912	0.272888	-3.84449	0.000120801	0.00225701
Hrh3	1.12246	-1.22185	0.318076	-3.84137	0.000122351	0.00228149	Hollow	YES
Mrps28	1.72427	-0.782416	0.203716	-3.84071	0.000122678	0.00228316
Neurod2	3.81475	-0.554227	0.144458	-3.8366	0.000124751	0.00231723
Kdr	0.527104	-1.43002	0.373008	-3.83374	0.000126212	0.00233981
Kcnj9	3.39209	-0.581879	0.151812	-3.83289	0.000126648	0.00234336
Psmc3	4.67095	-0.486457	0.126976	-3.8311	0.000127572	0.0023559
Ndufv1	4.31946	-0.497009	0.129825	-3.82831	0.000129029	0.0023782
Ankrd13c	2.05863	-0.694975	0.181687	-3.82513	0.000130705	0.00240448
Pcdh7	2.7119	-0.637876	0.166797	-3.82427	0.000131162	0.00240825
Zwint	12.9082	0.342201	0.0895342	3.82202	0.000132364	0.00242157	Septa
Htra1	2.91365	-0.755263	0.197611	-3.82196	0.000132394	0.00242157
Cdh11	1.20326	1.11421	0.291571	3.8214	0.000132694	0.00242242
Zfp771	2.99369	-0.706459	0.184905	-3.82066	0.000133095	0.00242512
Tmem229a	1.19135	-0.938964	0.246027	-3.81651	0.000135351	0.00246154	Hollow	YES
Sra1	2.67537	-0.630385	0.165528	-3.80832	0.000139912	0.00253965
Tm9sf3	4.62657	-0.51587	0.135487	-3.80752	0.000140366	0.0025414
Zfp385b	0.696573	-1.15256	0.302729	-3.80722	0.00014054	0.0025414
Kcnj4	1.44749	-0.860197	0.226262	-3.80177	0.000143668	0.00259306
Cplx3	0.363665	-1.50383	0.395893	-3.79857	0.000145532	0.00262177
Phpt1	3.79445	-0.52599	0.138558	-3.79618	0.000146941	0.00263725
Tmem258	5.46463	-0.494871	0.13036	-3.79618	0.000146943	0.00263725
Dalrd3	2.24998	-0.815778	0.215167	-3.79137	0.000149816	0.00268378
Cpne9	0.886257	-1.09448	0.289024	-3.78683	0.000152581	0.00272821
Furin	0.937062	-1.06476	0.281644	-3.7805	0.000156513	0.00279329
Acadvl	1.20997	-0.95009	0.251364	-3.77973	0.000156998	0.00279672
Sema3a	1.0801	0.999504	0.264593	3.77751	0.000158403	0.00281652
Spcs3	1.82836	-0.758198	0.20095	-3.77307	0.00016125	0.00286181
Cx3cl1	9.05578	-0.416521	0.110459	-3.77083	0.000162708	0.00288235
Prickle1	2.00552	-0.729676	0.193577	-3.76944	0.000163617	0.00288815
Nptn	23.1586	-0.313735	0.0832321	-3.7694	0.00016364	0.00288815
Edf1	8.01719	-0.388672	0.103158	-3.76773	0.000164738	0.00289926
Rpl31	18.7436	-0.303452	0.0805441	-3.76752	0.000164875	0.00289926
Nans	1.03873	-0.973573	0.258461	-3.76681	0.000165346	0.0029022
Kdm3a	0.439936	-1.3956	0.371621	-3.75543	0.000173041	0.00303171
Ngb	0.321856	-1.62253	0.4329	-3.74805	0.000178216	0.00311666
Zcchc18	7.68544	0.432344	0.115444	3.74506	0.000180349	0.00314737
Pcbd2	0.865975	-1.06589	0.284641	-3.74467	0.00018063	0.00314737
mt-Nd2	30.9422	0.302668	0.0809176	3.74045	0.000183694	0.00319214
S100a13	1.25963	-0.918886	0.245678	-3.74021	0.000183866	0.00319214
Shank3	2.14907	-0.687127	0.183821	-3.73802	0.000185477	0.00321426
Sod2	5.23447	-0.460538	0.123236	-3.73704	0.000186198	0.00322092
Preb	2.09379	-0.702632	0.188287	-3.7317	0.000190192	0.00328408
Pja2	9.39515	0.385754	0.103433	3.72949	0.000191868	0.00330704
Raver2	1.02078	-1.01549	0.272906	-3.72103	0.000198409	0.00341363
Plekho1	1.2513	-0.880928	0.237063	-3.71601	0.000202394	0.00347595
Slc6a1	7.36591	-0.491267	0.132241	-3.71493	0.00020326	0.00348456
Gprasp1	7.91772	0.438129	0.117998	3.71302	0.000204805	0.00350476
Gabra1	5.41768	-0.472607	0.127306	-3.71237	0.00020533	0.00350748
Snrpf	4.44822	-0.512612	0.138102	-3.71183	0.000205764	0.00350862
Desi1	4.05286	-0.582079	0.156914	-3.70955	0.000207631	0.00353417
Serinc3	6.09777	-0.46939	0.126624	-3.70697	0.000209754	0.00356087
Dbndd2	2.22779	-0.672485	0.181423	-3.70671	0.000209965	0.00356087
Tppp	2.0864	-0.683422	0.184395	-3.70629	0.000210317	0.00356087
Calm2	79.3435	0.244958	0.0661478	3.70319	0.000212905	0.00359831
Mrps24	6.08332	-0.441889	0.119537	-3.69668	0.00021844	0.00368536
Creg1	0.709946	-1.15009	0.311843	-3.68805	0.000225978	0.00380582
Fis1	10.2983	-0.368157	0.0998493	-3.68713	0.000226796	0.00381288
Ttc9b	10.8773	-0.335669	0.0910847	-3.68524	0.000228491	0.00383464
Gng3	41.2387	-0.280118	0.0761032	-3.68077	0.000232529	0.00389557
Nfkb2	0.48032	-2.21306	0.601421	-3.67972	0.000233487	0.00390479
Lemd2	1.89743	-0.729503	0.198552	-3.67412	0.000238673	0.00398455
Ost4	4.06827	-0.504451	0.137498	-3.66878	0.000243715	0.00406042
Hcfc2	0.749305	-1.11225	0.303224	-3.66808	0.00024438	0.00406042
Phka1	0.622271	-1.17092	0.319229	-3.66796	0.000244491	0.00406042
Slc35b1	3.36479	-0.542365	0.147988	-3.66491	0.000247421	0.00410195
Mien1	7.10084	-0.448465	0.122438	-3.66278	0.000249489	0.00412909
Sltm	1.44428	-0.821053	0.224357	-3.65959	0.000252621	0.0041737
Apoo	2.99048	-0.562596	0.153807	-3.6578	0.000254389	0.00419566
Rpl22	15.6815	-0.303786	0.0831227	-3.65467	0.000257517	0.00423994
Ifi27l2a	0.426307	-1.38544	0.379345	-3.6522	0.000260007	0.00427358
Srrm3	1.54863	-0.818695	0.224308	-3.64987	0.000262377	0.00430515
Tmem191c	6.34357	-0.433114	0.118958	-3.64091	0.000271674	0.00444849
Cacna1i	3.64949	-0.549206	0.150857	-3.64056	0.000272043	0.00444849	Hollow
Abca2	3.24798	-0.550924	0.151348	-3.64011	0.000272517	0.00444863
Ndufb5	8.87586	-0.3711	0.102046	-3.6366	0.00027626	0.00450205
Ell2	0.351489	-1.35532	0.372782	-3.63569	0.00027724	0.00451034
Llph	2.42223	-0.647645	0.178324	-3.63185	0.000281402	0.00457027
Rnf167	1.50999	-0.772726	0.212952	-3.62864	0.000284918	0.00461953
Trim23	1.12561	0.931522	0.256834	3.62694	0.000286803	0.00463831
H3f3b	13.4311	-0.319415	0.0880728	-3.62672	0.000287046	0.00463831
Ndufb2	16.4257	-0.307975	0.0849353	-3.62599	0.000287856	0.00464356
Lypd6b	1.38795	0.927709	0.256052	3.62313	0.000291057	0.00468729
Tmem181a	2.67493	-0.60291	0.166505	-3.62098	0.000293495	0.00471861
St8sia5	0.863385	-1.04939	0.289852	-3.62043	0.000294108	0.00472054
Adcy2	2.74747	-0.593069	0.163867	-3.61922	0.000295496	0.00472891
Lypd1	3.16761	0.785682	0.217137	3.61838	0.000296454	0.00472891	Septa	YES
Fgf13	5.07943	0.494535	0.136677	3.61828	0.000296567	0.00472891
Tjap1	0.557784	-1.22658	0.339	-3.61824	0.000296608	0.00472891
Tomm22	5.99593	-0.422036	0.11666	-3.61766	0.000297276	0.00473169
Lgmn	3.5481	-0.557668	0.1543	-3.61419	0.000301287	0.00478512
Gpr158	2.27931	-0.644167	0.178247	-3.61389	0.000301634	0.00478512	Hollow	YES
Rell2	3.89468	-0.626987	0.173633	-3.611	0.000305024	0.00483089
Tomm6	11.6195	-0.327677	0.0908022	-3.60869	0.000307751	0.00486603
Pop4	1.00764	0.991264	0.274743	3.60797	0.000308606	0.0048715
Ostn	0.663593	1.33278	0.370092	3.60122	0.000316729	0.00499147
Hmg20b	0.420915	-1.30096	0.361987	-3.59393	0.000325728	0.00512487
Tsc22d4	2.33455	-0.684249	0.190498	-3.5919	0.000328279	0.00515651
Mlf2	21.1432	-0.319278	0.0890208	-3.58655	0.000335082	0.00525474
Sac3d1	1.78772	-0.714621	0.199296	-3.58572	0.000336147	0.00526282
Rab3a	27.5167	-0.271889	0.0759602	-3.57937	0.000344429	0.00538367
Cnbp	9.02889	-0.383619	0.107204	-3.57841	0.000345686	0.00539451
Tubb3	33.8912	0.286021	0.0800246	3.57416	0.000351352	0.00547399	Septa
Clu	6.29686	-0.399507	0.111815	-3.57293	0.000353009	0.00549086
Ift43	0.783602	-1.12227	0.314273	-3.57099	0.000355638	0.00552278
Sestd1	2.68129	-0.596014	0.166949	-3.57003	0.000356939	0.00553091
Hsp90b1	5.46455	-0.470946	0.131927	-3.56975	0.000357318	0.00553091
Sept4	1.32206	-0.818848	0.229806	-3.56321	0.000366342	0.00566143
Ddx49	0.87748	-1.00008	0.280945	-3.55968	0.000371305	0.00571999
Hnrnpl	5.0684	-0.456083	0.128125	-3.55967	0.000371327	0.00571999
Atp1a1	17.946	-0.364899	0.102527	-3.55907	0.000372173	0.00572381
Rps20	35.7477	-0.2446	0.0687395	-3.55835	0.000373187	0.00573018
Mrps23	1.86315	-0.71359	0.200703	-3.55546	0.000377321	0.00578438
Nme2	17.7143	-0.32547	0.0915632	-3.5546	0.000378556	0.00579402
Ttyh3	4.08488	-0.495196	0.139384	-3.55276	0.000381212	0.00582536
Mink1	2.29343	-0.631773	0.177903	-3.55121	0.00038346	0.00585037
Rrp36	0.488091	-1.23878	0.349029	-3.54921	0.000386386	0.00588562
R3hdm1	7.96197	-0.393372	0.111222	-3.53681	0.000404995	0.00615927
Snhg20	3.52151	-0.537912	0.152211	-3.534	0.000409327	0.00621424
Car11	4.07029	-0.499173	0.141275	-3.53334	0.000410343	0.00621424
Gpx1	3.43471	-0.50484	0.142884	-3.5332	0.000410559	0.00621424
Hmgn1	2.99285	-0.567278	0.160946	-3.52466	0.000424029	0.006408
Polr2k	3.28687	-0.527366	0.149818	-3.52005	0.000431465	0.00651009
Celf1	2.85132	-0.590464	0.167827	-3.5183	0.000434326	0.00654293
Clstn1	22.3217	-0.279887	0.0796251	-3.51506	0.000439651	0.00661058
Gng5	3.76944	-0.507678	0.144456	-3.51442	0.000440722	0.00661058
Gpatch2l	1.42617	-0.784318	0.223178	-3.51431	0.00044089	0.00661058
Pcdh20	0.760427	-1.06455	0.303173	-3.51137	0.0004458	0.00667374
Impdh1	3.82824	-0.494624	0.140906	-3.51031	0.00044758	0.00668993
Gm20712	0.874043	-1.01458	0.289067	-3.50983	0.000448389	0.00669157
Diras2	7.49316	0.404965	0.115419	3.50864	0.000450398	0.00671106
Degs1	2.26201	-0.630076	0.179601	-3.5082	0.000451156	0.00671191
Elavl2	2.77612	0.604405	0.172343	3.50699	0.000453205	0.00673192
Krba1	0.979845	-0.940313	0.268171	-3.5064	0.000454212	0.00673642
Papola	3.01498	-0.549996	0.156884	-3.50575	0.000455319	0.00674239
Grik1	1.28333	-0.837032	0.238977	-3.50256	0.000460814	0.00681321
Speg	2.59112	-0.617681	0.176398	-3.50163	0.000462423	0.00682644
Atp1b1	49.8266	-0.255339	0.0729803	-3.49874	0.000467468	0.00688867
Slc24a2	1.67976	-0.706303	0.201894	-3.49839	0.000468078	0.00688867
Nell2	5.11821	-0.434416	0.124203	-3.49763	0.000469405	0.00689759
Nanos3	0.68879	-1.10879	0.31717	-3.49588	0.000472497	0.00692429
Thap3	0.809183	-1.09156	0.312249	-3.49578	0.00047267	0.00692429
Pde1a	1.50008	0.873772	0.250093	3.49378	0.000476225	0.0069608
Cdkn1a	0.534562	1.17353	0.335913	3.49356	0.000476618	0.0069608
Pgls	4.3928	-0.469294	0.134393	-3.49196	0.000479498	0.00699219
Eci2	1.09517	-0.873707	0.250618	-3.48621	0.000489911	0.00712991
B9d1	0.870184	-0.997818	0.286253	-3.48579	0.000490689	0.00712991
Nudc	3.08254	-0.545468	0.156495	-3.48552	0.000491178	0.00712991
Sft2d1	1.16775	-0.855598	0.245622	-3.4834	0.000495096	0.00717589
Pet100	2.89876	-0.548284	0.157468	-3.48188	0.000497906	0.0071992
Denr	3.42034	-0.505192	0.145098	-3.48172	0.00049821	0.0071992
Prdx5	10.3	-0.318214	0.0914947	-3.47795	0.000505266	0.00729015
Psmb3	5.45759	-0.421769	0.121299	-3.4771	0.000506877	0.00730239
Map7	0.458589	-1.23856	0.356439	-3.47483	0.000511176	0.00735325
Vstm2a	2.70086	0.630341	0.18145	3.47391	0.000512929	0.00736739
App	36.2602	-0.272048	0.0784188	-3.46916	0.000522084	0.00748763
Rplp0	14.3795	0.321118	0.0929285	3.45553	0.000549202	0.00786477
Stmn2	88.8639	0.238107	0.0689635	3.45266	0.000555088	0.00793718
Bola3	1.92458	-0.669444	0.193968	-3.4513	0.000557888	0.00796531
Unc13b	1.7562	-0.704042	0.204094	-3.44959	0.000561434	0.00800284
Efhd2	0.682788	-1.04348	0.302526	-3.44923	0.00056219	0.00800284
Mrps7	2.68098	-0.564819	0.163947	-3.44512	0.000570797	0.00811329
Ubac2	0.741421	-1.06173	0.308341	-3.44335	0.000574556	0.00814414
Suclg1	3.13555	-0.547752	0.159078	-3.4433	0.00057467	0.00814414
Omg	2.45421	-0.628338	0.182535	-3.4423	0.0005768	0.00816223
Rpl18	17.532	-0.29055	0.0844387	-3.44096	0.000579655	0.00818287
Hsd11b1	0.643063	-1.10274	0.320487	-3.44081	0.000579969	0.00818287
Eif6	2.47848	-0.601962	0.174978	-3.44021	0.000581266	0.00818909
Rph3a	3.44275	0.546409	0.158871	3.43933	0.000583146	0.0082035
Txn1	9.96189	0.352279	0.102477	3.43763	0.000586833	0.00824323
Mtcl1	2.02651	-0.651651	0.1897	-3.43517	0.000592186	0.00830623
Ptgds	1.06048	1.10799	0.322677	3.43373	0.000595344	0.0083365
Fam81a	1.38773	-0.789925	0.230072	-3.43339	0.000596087	0.0083365
Ncoa1	2.08605	-0.642397	0.187309	-3.42961	0.000604452	0.00843479
Jade1	0.540564	-1.15934	0.338059	-3.42942	0.000604879	0.00843479
Naa38	4.87527	-0.426724	0.1245	-3.4275	0.000609175	0.00848234
Inf2	0.830296	-1.03201	0.301308	-3.42509	0.000614603	0.00853385
Ier3ip1	2.69012	-0.556696	0.162536	-3.42506	0.000614659	0.00853385
Ssna1	4.51571	-0.475988	0.139106	-3.42176	0.000622168	0.00862559
Josd2	0.922236	-0.940286	0.274856	-3.42101	0.00062389	0.00862745
Gpc5	1.99426	0.713975	0.208709	3.42092	0.000624106	0.00862745
Kdm6b	0.666219	-1.06765	0.312156	-3.42025	0.000625635	0.00863612
Rab11fip4	2.3328	-0.606595	0.177375	-3.41984	0.000626584	0.00863674
Acot13	2.32845	-0.591797	0.173343	-3.41403	0.000640101	0.00881036
Khdrbs3	3.98103	0.515775	0.1512	3.41121	0.000646746	0.00888904
Mrpl12	5.62506	-0.452186	0.13267	-3.40835	0.000653576	0.00897002
Canx	8.30015	-0.369933	0.108553	-3.40784	0.000654786	0.00897376
Mtfp1	1.85135	-0.691257	0.203366	-3.39909	0.000676112	0.00923227
Vamp1	0.610552	-1.16345	0.342292	-3.39899	0.000676343	0.00923227
Fbxl18	0.681273	-1.03755	0.305267	-3.39882	0.000676768	0.00923227
Zfr2	1.21907	-0.825921	0.243051	-3.39814	0.000678451	0.00923227
Tmem208	3.82583	-0.500068	0.14716	-3.39813	0.000678475	0.00923227
Yars	3.73735	-0.483939	0.142689	-3.39155	0.000694983	0.00943259
Opcml	6.59599	0.416574	0.12283	3.39148	0.000695168	0.00943259
Nat8l	3.05816	-0.530455	0.156544	-3.38854	0.000702667	0.00951572
Klf9	3.58219	-0.503059	0.148469	-3.3883	0.000703284	0.00951572
Robo3	0.935913	-0.971437	0.286802	-3.38713	0.000706272	0.00954266
2610001J05Rik	2.29565	0.656226	0.194048	3.38177	0.000720209	0.00971724
Scd1	2.17757	-0.613561	0.181464	-3.38117	0.000721774	0.00972463
Tgoln1	1.34301	-0.831027	0.245829	-3.38051	0.000723508	0.00973429
Cox7a2	30.0598	-0.242145	0.0716648	-3.37886	0.000727879	0.00977934
Ccdc85b	4.87305	-0.43654	0.12942	-3.37304	0.000743432	0.00997429
Csnk2a2	1.7163	-0.685754	0.203394	-3.37155	0.000747474	0.0100145
Rps8	31.2621	-0.250245	0.074236	-3.37093	0.000749138	0.0100227
Pip4p1	2.68141	-0.554648	0.164732	-3.36696	0.00076001	0.0101526
Vps37a	0.978643	-0.923626	0.274353	-3.36657	0.000761103	0.0101526
Plekhj1	2.27875	-0.614303	0.18249	-3.36623	0.000762028	0.0101526
Slc35f4	1.41051	-0.762192	0.226529	-3.36465	0.000766411	0.0101968
Rpa3	1.59892	-0.74381	0.221403	-3.35954	0.000780736	0.0103729
Chn2	2.06735	0.704896	0.209889	3.35843	0.000783871	0.0104002
Cops6	4.47125	-0.423199	0.126052	-3.35735	0.000786941	0.0104264
Baiap2	3.47527	-0.552832	0.164969	-3.35112	0.000804861	0.0106491
Zbed3	0.428963	-1.25912	0.375946	-3.3492	0.00081044	0.0107081	Hollow	YES
Vhl	1.40462	-0.919809	0.275014	-3.34459	0.000824049	0.0108729
Ccdc124	5.36291	-0.41312	0.123619	-3.34187	0.00083215	0.0109647
Rbis	5.69315	-0.389575	0.116666	-3.33924	0.000840069	0.0110529
Ndufs3	6.67616	-0.365168	0.109368	-3.33888	0.000841158	0.0110529
Ctnnbl1	1.1098	-0.875244	0.262204	-3.33802	0.000843777	0.0110721
Vxn	2.45258	0.616372	0.184757	3.33612	0.000849578	0.011133
Hcfc1r1	9.81869	-0.374221	0.112248	-3.33388	0.000856448	0.0112011
Grin3a	0.989057	0.920272	0.276055	3.33366	0.000857117	0.0112011
Cd9	1.96893	-0.648455	0.194578	-3.33263	0.000860303	0.0112274
Srp14	11.8377	-0.319971	0.0960733	-3.33049	0.00086693	0.0112984
Iffo1	1.07114	-0.871439	0.261806	-3.32857	0.000872934	0.0113612
Gadd45g	0.974023	-0.898352	0.269934	-3.32804	0.000874598	0.0113674
Coro2b	2.93771	-0.525256	0.157888	-3.32676	0.000878623	0.0114042
Ier2	0.896247	-0.943373	0.283607	-3.32634	0.000879949	0.0114059
Sh3bgrl3	10.6599	0.314146	0.0944692	3.32538	0.000882996	0.01143
Jakmip1	1.08672	0.891809	0.268229	3.32481	0.000884792	0.0114377
Rps27l	2.66372	-0.550725	0.165783	-3.32197	0.000893854	0.0115242
Eif4a1	16.669	-0.304954	0.0918082	-3.32165	0.00089488	0.0115242
Scrt2	0.354118	-1.49154	0.449087	-3.32128	0.000896051	0.0115242
Tubb4b	12.7995	-0.310469	0.0934809	-3.3212	0.000896297	0.0115242
Rab7	8.38671	-0.366983	0.110515	-3.32066	0.000898059	0.0115313
Las1l	1.14656	-0.829997	0.250127	-3.3183	0.000905672	0.0116135
Itfg2	0.438829	-1.19427	0.359977	-3.31764	0.000907823	0.0116255
Cntn2	1.32072	-0.77809	0.23464	-3.3161	0.000912831	0.0116695
Sirt3	2.76445	-0.534532	0.161206	-3.31583	0.000913701	0.0116695
Ifitm10	0.433469	-1.16477	0.351543	-3.31331	0.000921998	0.0117598
Fscn1	6.65917	-0.408126	0.123252	-3.31132	0.000928553	0.0118276
Lsm5	1.4311	0.763803	0.230735	3.3103	0.000931949	0.0118428
Gfra2	1.00986	-1.01758	0.307405	-3.31022	0.000932221	0.0118428
Scand1	7.5123	-0.36149	0.109275	-3.30807	0.000939427	0.0119185
Ech1	1.78079	-0.665562	0.201244	-3.30724	0.000942194	0.0119378
Tmem65	4.90144	-0.419115	0.126762	-3.30631	0.00094535	0.0119612
Mpped2	1.14021	0.836083	0.252903	3.30595	0.000946546	0.0119612
Dynll1	41.5541	-0.231315	0.0700153	-3.30378	0.000953914	0.0120384
Trim3	3.68614	-0.492866	0.14957	-3.29521	0.000983491	0.0123954
Cdh20	0.608076	1.02065	0.309968	3.29275	0.000992127	0.0124877
Abcc5	2.65153	-0.552996	0.168019	-3.29127	0.000997375	0.0125373
Sdhb	5.90636	-0.391763	0.119134	-3.28844	0.00100745	0.0126474
Pik3r3	0.454057	-1.15453	0.351306	-3.2864	0.00101475	0.0127223
Upf1	0.884565	-1.09978	0.335017	-3.28276	0.00102796	0.012871
Tenm3	0.986238	-0.877992	0.267758	-3.27905	0.00104159	0.0130053
Atp5j	15.6811	-0.290896	0.0887207	-3.27879	0.00104255	0.0130053
Mrpl52	5.69244	-0.393671	0.120068	-3.27873	0.00104277	0.0130053
Metap1d	0.460377	-1.14594	0.349641	-3.27747	0.00104742	0.0130464
Vps52	2.31587	-0.597609	0.182363	-3.27703	0.00104905	0.0130497
Coch	1.87041	-0.658137	0.200882	-3.27624	0.001052	0.0130694
Zcrb1	6.04622	-0.381306	0.116451	-3.27439	0.00105892	0.0131343
Mrpl21	2.65696	-0.541678	0.165443	-3.27411	0.00105997	0.0131343
Gpr85	2.2206	0.651142	0.198934	3.27316	0.00106354	0.0131615
Cpne4	1.13709	1.05958	0.323755	3.27277	0.00106498	0.0131622
Fbxo31	3.52781	-0.474816	0.145169	-3.27077	0.00107255	0.0132371
Zfp511	1.33656	-0.75162	0.229822	-3.27044	0.00107381	0.0132371
Stmn3	63.7582	-0.217566	0.0667194	-3.2609	0.00111059	0.0136523
Akap7	3.77756	0.475216	0.145735	3.26083	0.00111087	0.0136523
Bmp1	1.65675	-0.70523	0.216288	-3.2606	0.00111176	0.0136523
Chl1	7.63062	0.405891	0.124564	3.25851	0.00112001	0.0137167	Septa
Mrpl15	1.91236	-0.62906	0.193055	-3.25845	0.00112023	0.0137167
Grm7	1.53035	0.752278	0.230889	3.25818	0.00112131	0.0137167
Mrps18b	1.76288	-0.6564	0.201626	-3.25554	0.00113178	0.0138243
Gabrb1	1.5238	0.771628	0.237063	3.25496	0.0011341	0.0138243
Arpc1b	0.895104	-0.900314	0.276605	-3.25487	0.00113445	0.0138243
Mfsd12	0.829063	-0.955354	0.293717	-3.25263	0.00114341	0.0139158
Mras	1.80071	-0.640679	0.197017	-3.25189	0.00114639	0.0139344
Atp6v0e	1.39755	-0.746626	0.229633	-3.25138	0.00114846	0.0139418
Enc1	8.94096	0.375788	0.115713	3.24758	0.00116393	0.0141117	Septa
Gm17018	2.39361	-0.582969	0.179594	-3.24603	0.00117026	0.0141374
Atp5g2	9.22181	-0.353681	0.108968	-3.24572	0.00117154	0.0141374
Mcl1	2.12947	-0.583882	0.179906	-3.24549	0.0011725	0.0141374
Thra	32.6639	0.243887	0.0751475	3.24544	0.00117269	0.0141374
Gpr37l1	3.0642	-0.552628	0.170288	-3.24526	0.00117344	0.0141374
Serpinh1	0.684861	-1.01929	0.314223	-3.24383	0.00117932	0.0141904
Ergic3	5.36707	-0.415981	0.128351	-3.24097	0.00119122	0.0143155
Idh3a	8.5591	-0.368835	0.113824	-3.2404	0.00119361	0.01432
Ppp6c	2.2007	-0.598344	0.184664	-3.24017	0.00119458	0.01432
Rpl39	26.5465	-0.250049	0.0772631	-3.23633	0.00121079	0.0144962
Unc5d	1.65506	-0.715064	0.221189	-3.23282	0.00122574	0.0146446
Polr3gl	0.694901	-1.01359	0.313542	-3.2327	0.00122625	0.0146446
Srek1	1.47322	-0.727903	0.225421	-3.22908	0.00124191	0.0148131
Rab5c	3.62053	-0.484349	0.150298	-3.2226	0.00127035	0.0151334
Bcas1	0.348613	-1.38272	0.429303	-3.22085	0.00127809	0.0152067
Gaa	3.5547	-0.498456	0.154841	-3.21915	0.00128571	0.0152784
Chchd3	2.22206	-0.591188	0.183802	-3.21644	0.00129792	0.0154043
Sf3b5	3.94546	-0.49112	0.152777	-3.21462	0.00130617	0.0154831
Cdr2l	0.512727	-1.10832	0.344889	-3.21355	0.00131105	0.0155059
Syngr1	6.77454	-0.388185	0.120799	-3.21349	0.00131134	0.0155059
Rbfox2	4.01594	-0.456185	0.142025	-3.21199	0.00131817	0.0155675
Dgkq	0.503041	-1.07989	0.33664	-3.20786	0.00133726	0.0157734
Aak1	4.07179	-0.468666	0.146145	-3.20686	0.00134194	0.0158091
Krcc1	0.389982	-1.21401	0.378932	-3.20376	0.00135644	0.0159603
Vasp	0.779376	-0.963912	0.301106	-3.20123	0.00136841	0.0160813
Qsox1	0.639602	-1.04095	0.325412	-3.19887	0.00137968	0.0161939
Eif3i	3.94558	-0.484164	0.151658	-3.19248	0.00141058	0.0165363
Col26a1	1.00675	-0.857976	0.268838	-3.19143	0.00141572	0.0165762
Cd63	1.96527	-0.60638	0.190057	-3.19052	0.00142019	0.0166082
Ssbp1	1.59144	-0.676219	0.212185	-3.18693	0.00143792	0.0167762
Spag9	7.14434	-0.353717	0.110993	-3.18684	0.00143835	0.0167762
Rundc1	1.03372	-0.853025	0.267715	-3.18632	0.00144096	0.0167762
Eif2b2	1.48894	-0.715953	0.224705	-3.1862	0.00144157	0.0167762
Gm10320	1.0588	-0.832306	0.261324	-3.18496	0.00144774	0.0168275
Golga7b	3.95925	-0.44649	0.140257	-3.18338	0.00145569	0.0168956
Tmem189	2.62593	-0.526683	0.165463	-3.18309	0.00145712	0.0168956
4931428F04Rik	2.16828	0.603024	0.189501	3.18217	0.00146177	0.0169289
Pcyt2	3.10955	-0.486621	0.153029	-3.17992	0.00147316	0.0170402
Eef2	21.6964	-0.259529	0.0816839	-3.17724	0.00148684	0.0171776
Gdf10	0.477296	-1.15592	0.363864	-3.1768	0.00148911	0.0171831
Slc22a3	0.562856	1.04469	0.329185	3.17356	0.00150579	0.0173547
Pnkd	4.70819	-0.467126	0.147262	-3.17207	0.00151358	0.0174235
Thrsp	0.395866	-1.2441	0.392252	-3.1717	0.0015155	0.0174247
Prdx2	21.0059	-0.253999	0.0801208	-3.1702	0.00152334	0.0174545
Gxylt1	0.538185	-1.11965	0.353181	-3.17018	0.00152347	0.0174545
Eif1ad	2.03112	-0.578324	0.182428	-3.17015	0.00152358	0.0174545
1700001L19Rik	1.65313	0.819352	0.258498	3.16967	0.00152612	0.0174628
Kctd17	5.07959	-0.441582	0.139348	-3.16892	0.00153007	0.017487
Fmc1	4.09441	-0.426581	0.134667	-3.16768	0.00153661	0.0175409
Gfer	0.824726	-0.928939	0.293365	-3.16649	0.00154288	0.0175915
Rpl26	18.0988	0.289962	0.0916612	3.16341	0.00155933	0.0177578
Smad5	0.403012	-1.15086	0.363849	-3.16302	0.0015614	0.0177603
Sesn1	1.44545	-0.720567	0.227837	-3.16264	0.00156345	0.0177625
Lsm14b	1.54364	-0.681636	0.215559	-3.16218	0.00156593	0.0177695
Ruvbl2	0.949871	-0.845939	0.267575	-3.1615	0.0015696	0.01779
Cipc	1.37895	-0.730338	0.231181	-3.15916	0.00158227	0.0179124
Naa10	1.26834	-0.738445	0.234031	-3.15533	0.00160318	0.0181277
Nt5c	3.6649	-0.451826	0.143222	-3.15473	0.00160646	0.0181433
Atp1b2	5.72602	-0.4165	0.132128	-3.15224	0.00162023	0.0182773
Dusp14	0.497375	-1.10801	0.351548	-3.15181	0.00162263	0.0182827
Ddt	2.4804	-0.532495	0.169311	-3.14507	0.00166046	0.018687
Pgrmc1	7.4814	0.375565	0.119435	3.14452	0.00166359	0.0187002
Npnt	1.32865	-0.909918	0.289702	-3.14087	0.00168445	0.0189125
Psmb6	7.53447	-0.343975	0.109548	-3.13995	0.00168977	0.0189261
Rnf181	2.45552	-0.541096	0.172337	-3.13976	0.00169087	0.0189261
Ghitm	7.86571	-0.35017	0.111535	-3.13955	0.00169205	0.0189261
Osbpl2	1.57113	-0.681309	0.217026	-3.13929	0.00169358	0.0189261
Auh	2.2273	-0.55194	0.175839	-3.13889	0.00169589	0.0189298
Eif4a2	17.4006	0.270143	0.0861392	3.13612	0.00171199	0.019062
Mtf1	0.527679	-1.06024	0.338101	-3.13588	0.00171337	0.019062
mt-Atp8	1.08967	0.834726	0.26619	3.13583	0.00171371	0.019062
AI413582	5.97476	-0.385505	0.123029	-3.13344	0.00172769	0.0191952
Herc1	4.66199	-0.435357	0.138963	-3.1329	0.00173089	0.0192085
Slc25a33	1.47533	-0.687571	0.219677	-3.12992	0.00174851	0.0193815
Slc6a7	1.94621	-0.636886	0.203566	-3.12865	0.0017561	0.0194318
Fbxw5	3.64853	-0.451879	0.14444	-3.12848	0.00175711	0.0194318
Zfp593	0.65274	-0.987879	0.315895	-3.12723	0.00176459	0.019492
Mrto4	2.20055	-0.595323	0.190514	-3.12482	0.00177914	0.0196301
Tgfbr1	0.874877	-0.904063	0.289461	-3.12327	0.00178855	0.019705	Hollow	YES
Polr2c	3.1016	-0.496388	0.158945	-3.12302	0.00179005	0.019705
Zfp410	0.754642	-0.956369	0.306441	-3.12089	0.00180307	0.0198112
Lins1	0.504859	-1.09169	0.349816	-3.12076	0.00180384	0.0198112
Acadsb	1.30041	-0.745806	0.239219	-3.11767	0.00182285	0.0199881
Jdp2	1.45626	-0.705925	0.226478	-3.11697	0.00182722	0.0199881
Lsm4	3.0496	-0.489323	0.156988	-3.11695	0.00182732	0.0199881
Ybx1	13.3596	0.302138	0.0969387	3.11679	0.00182831	0.0199881
Gpr161	0.493768	-1.09057	0.350092	-3.11509	0.00183887	0.0200807
D1Ertd622e	1.88167	-0.607845	0.195185	-3.1142	0.00184441	0.0201182
Mapk14	2.20691	-0.569219	0.182874	-3.11264	0.00185425	0.0202025
Nnat	4.6097	0.436653	0.140358	3.111	0.00186457	0.0202918
0610012G03Rik	7.38496	-0.341261	0.109753	-3.10934	0.00187503	0.0203824
Cdc25b	0.484212	-1.09183	0.35135	-3.10752	0.00188664	0.0204853
Parp6	9.43578	-0.319916	0.102969	-3.10692	0.00189047	0.0205037
Atl1	3.20155	0.490647	0.157966	3.10604	0.00189614	0.0205419
Rps2	27.2374	-0.23906	0.0770066	-3.1044	0.00190664	0.0206323
Cyth2	3.74263	-0.45406	0.14629	-3.10383	0.00191033	0.0206488
Metrn	1.33724	-0.712471	0.229595	-3.10317	0.00191461	0.0206713
Tomm34	1.17913	-0.769731	0.248073	-3.10284	0.00191673	0.0206713
Rprml	5.88434	-0.380333	0.122624	-3.10163	0.00192462	0.020733
Wdcp	0.284967	-1.31079	0.422682	-3.10112	0.00192788	0.0207448
Gpr88	4.08611	-0.470597	0.151892	-3.09824	0.00194676	0.0209047	Hollow
Gramd1a	5.85286	-0.411677	0.132877	-3.09818	0.00194711	0.0209047
Gstp1	2.09879	-0.590776	0.190725	-3.09753	0.00195141	0.0209273
Abtb2	0.487052	-1.09578	0.353799	-3.09719	0.00195364	0.0209278
Tmem176b	0.797346	-0.922392	0.29796	-3.09569	0.00196353	0.0209823
Morn2	0.780486	-0.926814	0.299396	-3.09561	0.00196409	0.0209823
Fkbp1a	21.7687	-0.236715	0.0764725	-3.09543	0.0019653	0.0209823
Vps35	5.04243	0.405857	0.131242	3.09244	0.00198517	0.0211707
Gm9844	0.623958	-1.00008	0.323784	-3.08873	0.00201013	0.021413
Cadps2	3.09258	-0.498103	0.161564	-3.083	0.00204923	0.0218053	Hollow
Rgcc	2.86785	-0.487019	0.158058	-3.08127	0.00206119	0.0219081
Mrpl4	1.85446	-0.608636	0.197589	-3.08032	0.0020678	0.021954
Smox	1.16433	-0.765629	0.248637	-3.07931	0.00207484	0.0220043
Ifrd1	2.86552	-0.515851	0.167573	-3.07838	0.00208132	0.0220487
Tmem19	1.08588	-0.803394	0.261082	-3.07717	0.00208977	0.0221137
Lrrc42	0.967591	-0.823048	0.267618	-3.07545	0.00210183	0.0222167
Pcsk1n	43.6383	-0.215972	0.0702455	-3.07453	0.00210832	0.0222607
Ltc4s	0.318204	-1.26807	0.4126	-3.07337	0.00211654	0.0223228
Zcchc7	0.981093	-0.840773	0.273723	-3.07162	0.002129	0.0224296
Scn3b	3.39206	0.492864	0.160498	3.07085	0.0021345	0.0224627
Pgam1	15.8671	-0.271412	0.0883968	-3.07038	0.00213784	0.0224731
Tbcb	7.42314	-0.366451	0.119363	-3.07006	0.00214018	0.0224731
Mmd2	5.45161	-0.400183	0.130422	-3.06837	0.00215227	0.0225753
Rgs13	0.291446	-1.57412	0.513161	-3.0675	0.00215861	0.0226169
Hsd17b12	1.94474	-0.591887	0.193001	-3.06675	0.00216398	0.0226483
Gnao1	19.3725	0.268393	0.0875611	3.06521	0.0021752	0.0227409
Emx1	1.6198	-0.665728	0.217432	-3.06178	0.00220028	0.022978
Mfsd5	1.44432	-0.696649	0.227884	-3.05703	0.00223542	0.0233196
Pgp	3.13951	-0.455776	0.149245	-3.05387	0.00225909	0.0235407
Sema4c	0.343379	-1.293	0.423459	-3.05343	0.00226238	0.0235494
St3gal3	1.40114	-0.705273	0.231038	-3.05263	0.00226849	0.0235629
Pfkm	5.95407	-0.358887	0.117574	-3.05242	0.00227004	0.0235629
Timm13	11.7379	-0.272589	0.0893067	-3.05228	0.00227106	0.0235629
Pigt	1.20096	-0.729084	0.238959	-3.05108	0.0022802	0.0236321
Metap2	2.74896	-0.538052	0.176386	-3.05042	0.00228525	0.0236345
Nup62	1.19446	-0.747743	0.245171	-3.04989	0.00228927	0.0236345
Fam49a	9.01774	-0.339695	0.111384	-3.04977	0.0022902	0.0236345
Camk2n1	20.6772	-0.285109	0.0934954	-3.04945	0.00229263	0.0236345
Slc52a2	0.519136	-1.05099	0.344675	-3.04921	0.00229443	0.0236345
Man2b1	0.612074	-0.988208	0.324098	-3.0491	0.00229526	0.0236345
Uggt2	0.55162	-1.01819	0.334008	-3.04842	0.00230051	0.0236631
Celf4	4.58335	0.429	0.140834	3.04615	0.00231795	0.0238168
Kcnd2	2.93683	-0.495734	0.162814	-3.04478	0.00232847	0.0238508
Gnai2	4.37849	-0.438894	0.144146	-3.04478	0.00232848	0.0238508
Slc17a7	18.0375	-0.29273	0.0961424	-3.04475	0.00232873	0.0238508
Ubl3	2.85206	-0.490657	0.161187	-3.04403	0.0023343	0.0238657
Rogdi	2.10201	-0.58848	0.19333	-3.04392	0.00233517	0.0238657
Pon2	1.55431	-0.655061	0.215356	-3.04176	0.00235198	0.0240117
Jpt1	13.1336	0.312266	0.102683	3.04107	0.0023574	0.0240415
Glud1	7.94155	-0.346482	0.114017	-3.03886	0.00237476	0.0241927
Acaa2	0.68818	-0.983229	0.323719	-3.03729	0.00238714	0.024293
Bola1	1.32552	-0.709315	0.233594	-3.03653	0.00239321	0.0243288
Scrg1	1.52264	-0.638309	0.210342	-3.03463	0.0024083	0.0244563
Srrm2	3.46706	-0.443839	0.146274	-3.03431	0.0024109	0.0244567
Grpel1	3.07086	-0.476162	0.157065	-3.03163	0.0024324	0.0246429
Wwp1	0.729359	0.919991	0.303489	3.03138	0.0024344	0.0246429
1700021F05Rik	1.41749	-0.679408	0.224186	-3.03055	0.00244109	0.0246844
Nrcam	4.55532	0.428367	0.141423	3.02898	0.00245383	0.024787
Tesc	0.330615	-1.17007	0.386855	-3.02457	0.00248986	0.0251245
Man2a2	2.46431	-0.524829	0.173652	-3.0223	0.00250859	0.0252868
Hmgcl	0.877302	-0.862344	0.285377	-3.02177	0.00251302	0.0253048
Raly	3.26533	-0.449155	0.148752	-3.01949	0.00253203	0.0254694
Mpv17l2	0.892991	-0.842876	0.279287	-3.01796	0.00254485	0.0255715
Rbm28	1.09186	-0.7732	0.256242	-3.01747	0.00254897	0.0255844
Ccdc85c	0.713048	-0.976981	0.323807	-3.01717	0.00255148	0.0255844
Atp9a	8.1528	0.34689	0.115012	3.01612	0.00256032	0.0256226
Ubr5	1.86343	-0.608628	0.201794	-3.01608	0.00256065	0.0256226
Nr2c2ap	1.06457	-0.788696	0.261615	-3.01471	0.00257221	0.0256532
Hadha	1.0982	-0.763378	0.253217	-3.01471	0.00257223	0.0256532
Tspan33	0.652826	-0.955361	0.316922	-3.0145	0.00257405	0.0256532
Ctsd	4.42621	-0.397043	0.131713	-3.01445	0.00257444	0.0256532
Zmat4	0.490472	-1.04488	0.34688	-3.01222	0.0025934	0.0258026
Tspan14	1.15086	-0.742885	0.246655	-3.01184	0.00259672	0.0258026
Hadh	0.466374	-1.04657	0.347497	-3.01174	0.00259752	0.0258026
Trappc2l	5.64653	-0.374244	0.124341	-3.00982	0.00261406	0.02594
Slc13a3	0.468491	-1.13004	0.375563	-3.00891	0.00262188	0.0259906
H1f0	2.55115	-0.505748	0.168192	-3.00697	0.00263865	0.0261297
Kif22	0.886796	-0.839724	0.279347	-3.00602	0.00264691	0.0261844
Lurap1l	0.39513	-1.16083	0.386322	-3.00483	0.00265727	0.0262272
Rpl27a	29.3804	0.221093	0.0735824	3.00469	0.00265848	0.0262272
Faap100	1.62943	0.680875	0.226612	3.00458	0.00265946	0.0262272
Gpi1	9.76707	-0.305336	0.101651	-3.00376	0.00266665	0.026271
Rtn2	5.35204	-0.395658	0.132048	-2.99631	0.00273265	0.0268716
Slc25a39	2.6019	-0.50386	0.168164	-2.99625	0.00273323	0.0268716
Chchd6	3.89467	-0.413009	0.137861	-2.99583	0.00273696	0.0268807
Ap2a1	6.88799	-0.374351	0.125005	-2.99469	0.00274728	0.0269543
Cdk4	3.03182	-0.487173	0.162935	-2.98999	0.00278989	0.0273443
Erh	4.4891	-0.388985	0.130132	-2.98915	0.00279756	0.0273915
Ipo4	2.53118	-0.51584	0.172612	-2.98843	0.00280413	0.0274277
Kifc2	9.11222	-0.297395	0.0996233	-2.9852	0.00283396	0.0276602
Mrpl36	2.14229	-0.543664	0.182122	-2.98516	0.00283431	0.0276602
Tmed4	1.51706	-0.650664	0.217984	-2.98491	0.00283658	0.0276602
Lrrc8a	0.615467	-0.971871	0.325698	-2.98396	0.00284542	0.0277182
Asic2	1.56801	0.667444	0.223792	2.98243	0.00285966	0.0278286
Ppp1r12c	2.38719	-0.532455	0.178575	-2.98169	0.00286662	0.027868
Dedd	0.617018	-0.953691	0.319942	-2.98083	0.00287471	0.0278949
Ptpmt1	1.95417	-0.570872	0.191518	-2.98077	0.00287522	0.0278949
Ctdsp2	1.42536	-0.655533	0.220221	-2.9767	0.00291368	0.0282394
Arid1b	1.28537	-0.712057	0.239347	-2.975	0.00292985	0.0283674
Kcnc4	1.12034	0.819496	0.275645	2.97301	0.0029489	0.028523
Plb1	0.600758	-1.00029	0.336538	-2.97228	0.002956	0.0285584
Naca	15.2783	-0.290118	0.0976165	-2.97201	0.00295854	0.0285584
Impdh2	2.34575	-0.5559	0.187075	-2.97153	0.00296318	0.0285672
Cpne6	2.83157	0.511983	0.172309	2.9713	0.00296542	0.0285672
Tmem147	6.2177	-0.343074	0.115495	-2.97047	0.00297344	0.0285895
Pgrmc2	1.48235	-0.652377	0.219626	-2.9704	0.00297412	0.0285895
Mvd	1.96964	-0.579982	0.195271	-2.97013	0.0029767	0.0285895
Bcl7b	1.01917	-0.766575	0.25819	-2.96903	0.00298739	0.0286634
Smim8	1.2835	-0.698706	0.235376	-2.96847	0.00299288	0.0286872
Ephb6	4.0155	-0.426926	0.143848	-2.9679	0.00299845	0.0287119
Hirip3	0.499873	-1.0063	0.339204	-2.96664	0.00301077	0.028801
Lrfn5	2.55997	0.521576	0.175887	2.96541	0.00302278	0.0288658
Sorcs2	1.73316	-0.620591	0.209282	-2.96533	0.00302358	0.0288658
Nap1l4	4.73686	-0.404509	0.136489	-2.96367	0.00303995	0.0289931
Idh3g	3.06682	-0.457894	0.154621	-2.9614	0.00306241	0.0291623
Tle2	0.342201	-1.21141	0.409085	-2.96127	0.00306378	0.0291623
Galnt18	1.55581	-0.65054	0.219855	-2.95895	0.00308687	0.0293528
Psmg4	1.84713	-0.58192	0.196695	-2.95849	0.00309147	0.0293659
Ctla2a	0.794007	-0.928649	0.313933	-2.95811	0.00309531	0.0293659
Lama4	0.429708	-1.08216	0.365867	-2.95778	0.00309862	0.0293659
Grid1	0.431698	-1.09888	0.371547	-2.95759	0.00310052	0.0293659
Ank3	6.45339	-0.360767	0.121998	-2.95716	0.00310491	0.0293784
Klhdc10	2.88068	-0.489906	0.165686	-2.95683	0.00310816	0.0293801
Marf1	0.658916	-0.946622	0.320252	-2.95587	0.00311789	0.029443
Arpp19	5.23595	-0.365355	0.123656	-2.95461	0.00313067	0.0295345
Kmt2d	0.488828	-1.078	0.364994	-2.95348	0.00314215	0.0296136
Timm17a	3.38827	-0.443416	0.150255	-2.95109	0.00316653	0.029814
Erg28	2.62714	-0.502798	0.1707	-2.9455	0.00322436	0.0303286
Nacc2	0.904775	-0.822714	0.279766	-2.94072	0.00327452	0.0307702
Dpy19l3	0.517192	-0.979069	0.332975	-2.94037	0.00327819	0.0307744
Yipf4	1.41554	-0.683128	0.232387	-2.93962	0.00328616	0.0308191
Cdk14	2.38079	-0.512749	0.174483	-2.93867	0.00329621	0.0308441
Tomm40l	1.60613	-0.621444	0.211492	-2.93837	0.00329938	0.0308441
Serinc1	20.6736	0.255711	0.0870317	2.93813	0.00330195	0.0308441
Grp	0.930028	-0.807207	0.274753	-2.93793	0.00330406	0.0308441
Dnm1	11.3902	-0.300489	0.102282	-2.93785	0.00330496	0.0308441
Rps18	7.46989	0.316753	0.107875	2.93631	0.00332144	0.0309677
Efnb3	1.72149	0.643304	0.219204	2.93472	0.00333845	0.031096	Septa	YES
Cpt1a	0.710169	-0.919642	0.31376	-2.93104	0.00337831	0.0314367
Trappc4	3.41476	0.44843	0.153062	2.92973	0.00339261	0.031539
Eml6	0.666975	-0.897074	0.306362	-2.92815	0.00340988	0.0316604
Igfbp5	3.30354	0.567376	0.193781	2.92793	0.00341228	0.0316604
Top1mt	0.53573	-1.0067	0.343958	-2.92681	0.00342455	0.031703
Pura	0.950693	-0.800887	0.273643	-2.92675	0.00342519	0.031703
Fgfr1op2	1.50141	-0.629943	0.215247	-2.92661	0.00342682	0.031703
Ascl1	0.446854	-1.08659	0.371358	-2.92599	0.00343358	0.0317349
Sh2d5	0.666053	-0.914669	0.312712	-2.92495	0.00344511	0.0318107
Atp5f1	16.4541	-0.258793	0.0885301	-2.92322	0.00346435	0.0319513
U2af1	3.10686	-0.452342	0.15477	-2.92268	0.00347032	0.0319513
H1fx	1.91686	-0.572094	0.195743	-2.92268	0.00347035	0.0319513
Il34	1.06912	-0.757635	0.259474	-2.91988	0.00350162	0.032189
Gigyf1	0.397776	-1.0748	0.36811	-2.91977	0.0035029	0.032189
Ly6e	3.53753	-0.460104	0.157634	-2.91882	0.00351362	0.0322565
AI854703	0.864986	-0.867895	0.297814	-2.91422	0.0035658	0.0327042
Cuta	3.22558	-0.440416	0.151213	-2.91255	0.00358491	0.0328365
Rpl7l1	1.60065	-0.627105	0.215325	-2.91236	0.0035871	0.0328365
Abcc8	0.683013	-0.942737	0.324023	-2.90948	0.0036203	0.0331088
Ccdc149	1.12312	-0.735758	0.253049	-2.90757	0.00364252	0.0332802
Saxo2	1.34065	-0.704932	0.242764	-2.90378	0.00368689	0.0336534
Cntnap1	0.549922	-1.01148	0.348375	-2.90344	0.00369093	0.0336582
Mrpl54	3.07916	-0.456018	0.157107	-2.9026	0.00370076	0.0336919
Lin7c	4.30245	0.415245	0.143063	2.90253	0.00370167	0.0336919
Foxo3	0.893054	-0.792356	0.273081	-2.90155	0.00371326	0.0337652
Dynlrb1	14.8608	0.258601	0.0891531	2.90064	0.00372403	0.0338219
Dgkh	1.89711	0.598547	0.206365	2.90043	0.00372656	0.0338219
1110038F14Rik	1.64687	-0.624114	0.215254	-2.89942	0.0037385	0.0338981
Hagh	2.82017	-0.450401	0.155378	-2.89875	0.0037465	0.0339248
Ten1	2.86514	-0.468942	0.161783	-2.89858	0.00374854	0.0339248
Car2	2.502	-0.482003	0.166358	-2.89739	0.00376285	0.0340044
Fam241b	1.24872	0.724943	0.250217	2.89725	0.00376444	0.0340044
Rhoc	0.737267	-0.93217	0.321819	-2.89657	0.00377268	0.0340404
Ino80c	0.938922	-0.848834	0.293072	-2.89633	0.00377554	0.0340404
Slc25a37	0.547952	-0.987907	0.341209	-2.89531	0.0037878	0.0341187
Cox6b1	24.3971	-0.239509	0.0827705	-2.89365	0.00380796	0.034268
Cnrip1	7.42994	0.301491	0.104249	2.89203	0.00382763	0.0344127
Mydgf	3.24874	-0.44315	0.153282	-2.89108	0.00383925	0.0344848
Rtn4	15.3711	-0.25073	0.0867899	-2.88893	0.00386559	0.0346888
Sem1	8.43539	-0.299432	0.103888	-2.88227	0.00394826	0.0353974
Rps24	42.597	-0.201044	0.0697658	-2.88169	0.00395543	0.0354285
Wdr81	0.813787	-0.861313	0.298998	-2.88066	0.00396837	0.0354971
Vkorc1	1.39857	-0.660241	0.229211	-2.88049	0.00397051	0.0354971
Rnpepl1	1.4816	-0.647149	0.22477	-2.87916	0.00398738	0.0356147
Mgat5	1.41396	-0.619816	0.215313	-2.87867	0.00399352	0.0356362
Kcnab2	1.06658	-0.749675	0.260528	-2.87752	0.0040081	0.0357004
Dcaf8	2.00926	-0.548211	0.190515	-2.87752	0.00400818	0.0357004
Nav2	1.4763	-0.657445	0.22852	-2.87697	0.00401516	0.0357293
Cdh8	1.52344	0.654998	0.227979	2.87306	0.00406511	0.0361402	Septa	YES
Gabarap	9.70684	-0.277783	0.0967114	-2.87228	0.00407517	0.0361761
Nudt3	7.52262	-0.310917	0.108252	-2.87216	0.00407671	0.0361761
Susd5	0.809017	0.816312	0.284372	2.87058	0.00409722	0.0363244	Septa	YES
Asna1	3.03463	-0.439391	0.153144	-2.86914	0.00411592	0.0364564
Polr1a	0.554732	-0.9774	0.340727	-2.86858	0.00412325	0.0364876
Psph	1.21981	-0.683662	0.238731	-2.86374	0.00418672	0.037015
Tarbp2	1.26635	-0.688705	0.240551	-2.86303	0.00419605	0.0370632
Kif1c	0.349924	-1.07709	0.376315	-2.8622	0.00420716	0.037127
Sec16a	0.935725	-0.769019	0.268719	-2.8618	0.00421248	0.0371397
Scyl1	1.25095	-0.667139	0.233262	-2.86004	0.00423583	0.0373112
Rdh13	0.849611	-0.788675	0.275851	-2.85906	0.00424894	0.0373922
Zfyve1	0.322006	-1.24228	0.43478	-2.85726	0.0042731	0.0375703
Depdc5	0.593494	-0.935415	0.327616	-2.85522	0.00430067	0.037778
Ids	8.57256	0.294582	0.103191	2.85473	0.00430738	0.0378022
Gak	2.21964	-0.520217	0.182272	-2.85407	0.00431625	0.0378267
Rpn2	4.76019	-0.424467	0.14873	-2.85394	0.00431808	0.0378267
Setd5	0.772035	-0.864164	0.302983	-2.85218	0.00434199	0.0380013
Csnk1d	2.17978	-0.508181	0.178238	-2.85114	0.00435629	0.0380917
Flywch2	1.70876	-0.610323	0.214176	-2.84963	0.00437706	0.0382383
Ccdc107	2.16094	-0.529754	0.185928	-2.84925	0.00438227	0.0382489
Casd1	2.09073	0.564061	0.198006	2.8487	0.00438978	0.0382796
Ankrd46	3.99193	0.391357	0.1375	2.84623	0.00442407	0.0385434
Aopep	1.28116	-0.707984	0.248884	-2.84463	0.00444631	0.0387019
Atp23	0.529696	-0.981174	0.345077	-2.84334	0.00446427	0.038823
Prkcg	4.52913	0.444693	0.156547	2.84064	0.00450227	0.0391178
Pcdh1	1.08058	-0.733989	0.258484	-2.83959	0.00451719	0.0392118
Senp2	2.73033	-0.473562	0.166808	-2.83897	0.00452596	0.0392523
Mycbp	0.738709	-0.859739	0.303103	-2.83646	0.00456174	0.0395268
Kpna4	2.07126	-0.553263	0.195119	-2.83552	0.00457511	0.0396068
1600002K03Rik	0.396538	-1.02958	0.363393	-2.83324	0.00460785	0.0398235
Nfic	0.896307	-0.796739	0.281215	-2.8332	0.00460847	0.0398235
Ralyl	3.01365	0.477244	0.168582	2.83093	0.00464127	0.0400707
Msn	0.316698	-1.24839	0.441279	-2.82902	0.00466903	0.0402493
Ptrhd1	1.7725	-0.568793	0.201063	-2.82893	0.00467036	0.0402493
Lrrfip1	2.73823	-0.472859	0.167547	-2.82224	0.00476894	0.0410618
Cenpx	2.34421	-0.531374	0.188312	-2.82177	0.00477594	0.0410851
Gnptg	2.1788	-0.508263	0.180206	-2.82046	0.00479549	0.0412162
Mrpl37	1.97646	-0.54298	0.192593	-2.8193	0.00481279	0.0413278
Gm8797	8.74632	-0.302518	0.107344	-2.81821	0.00482916	0.0414312
1190007I07Rik	0.563474	-0.931059	0.330576	-2.81647	0.00485544	0.0416046
Hdgfl2	2.30448	-0.49995	0.177524	-2.81624	0.00485894	0.0416046
Frat2	0.580222	-0.960029	0.340918	-2.81601	0.00486243	0.0416046
Mrpl13	2.54916	-0.487551	0.173308	-2.81321	0.00490503	0.0419317
Nfat5	0.467084	-0.976178	0.347181	-2.81173	0.00492765	0.0420874
Tagap1	0.572981	-0.936944	0.333431	-2.81001	0.00495401	0.0422748
Fbrsl1	1.28612	-0.689784	0.245542	-2.80923	0.00496601	0.0423394
Kcnq2	3.85893	-0.417717	0.148715	-2.80885	0.00497186	0.0423397
Basp1	44.2628	0.212257	0.0755724	2.80866	0.00497489	0.0423397
Gjb6	0.34433	-1.15461	0.411369	-2.80675	0.00500447	0.0425204
Nat10	0.660964	-0.90319	0.321797	-2.80671	0.00500502	0.0425204
Mgat3	2.5814	-0.475116	0.169319	-2.80603	0.00501554	0.042543
Eif1ax	8.72293	-0.306927	0.109383	-2.80597	0.00501656	0.042543
Thrap3	1.73361	-0.584783	0.208476	-2.80503	0.00503119	0.0426292
Snx3	9.59692	-0.301861	0.10769	-2.80305	0.00506224	0.0428543
Slc39a1	0.524914	-0.939995	0.33553	-2.80153	0.00508615	0.0430187
Mturn	2.77694	0.485609	0.173419	2.8002	0.00510703	0.0431571
1700048O20Rik	0.412877	-1.06399	0.380137	-2.79895	0.00512688	0.0432866
Tmem229b	2.51406	-0.475499	0.169935	-2.79812	0.00514013	0.0433602
Anks1	0.851949	-0.785599	0.280818	-2.79753	0.00514946	0.0434006
Ywhag	31.4217	0.225812	0.0807603	2.79608	0.00517263	0.0435575
Grik5	5.2316	-0.339646	0.121526	-2.79485	0.00519244	0.0436859
Med21	2.10931	-0.515175	0.184481	-2.79256	0.00522923	0.0439191
Ythdf1	2.695	-0.489242	0.175195	-2.79256	0.00522934	0.0439191
Mrs2	1.07908	-0.724072	0.259346	-2.79192	0.00523963	0.0439669
Hmgn3	4.48194	-0.370611	0.13281	-2.79053	0.00526215	0.0441172
Chga	3.80581	-0.391732	0.14045	-2.78912	0.00528515	0.044257
Rpl11	26.6637	-0.221346	0.0793656	-2.78894	0.00528808	0.044257
Ccnl2	2.64525	-0.464936	0.166787	-2.7876	0.00531003	0.0444019
Sf3b6	4.05031	-0.375555	0.134842	-2.78514	0.00535038	0.0446613
Tmem138	0.520469	-0.977871	0.351103	-2.78514	0.00535039	0.0446613
Laptm4a	3.98225	-0.382182	0.137262	-2.78432	0.00536397	0.0447356
Elmo1	1.4762	0.626933	0.225247	2.78332	0.00538063	0.0448354
Xrcc6	0.444071	-1.00436	0.360927	-2.78273	0.0053904	0.0448778
Cacna2d1	6.07113	-0.316353	0.113707	-2.78217	0.00539971	0.0449162
Arl4a	3.39049	-0.415071	0.149216	-2.78168	0.00540783	0.0449447	Hollow
Gpam	2.18958	-0.517409	0.186171	-2.77921	0.00544913	0.0452486
Rab4b	2.91298	-0.44812	0.161268	-2.77873	0.00545719	0.0452762
Zyg11b	2.51495	0.537779	0.193645	2.77713	0.00548411	0.0454601
Mrps16	2.55117	-0.476831	0.171737	-2.77652	0.00549439	0.0454716
Psmd8	5.29871	-0.346814	0.124911	-2.77649	0.005495	0.0454716
Slc45a4	1.39822	-0.628324	0.226399	-2.7753	0.00551511	0.0455587
Pabpc4	0.781813	0.784529	0.282759	2.77455	0.00552785	0.0455587
Hpcal4	2.78937	0.491145	0.177028	2.7744	0.0055304	0.0455587
Csnk1a1	4.90754	-0.363641	0.131075	-2.77431	0.00553191	0.0455587
Tardbp	3.59048	-0.415267	0.149686	-2.77425	0.00553298	0.0455587
Hnrnpul2	3.30992	-0.409154	0.147487	-2.77418	0.0055341	0.0455587
Tmem38a	2.51085	-0.576421	0.207817	-2.7737	0.00554227	0.0455867
Hivep3	1.96952	-0.527095	0.190307	-2.76971	0.00561066	0.0461096
Atp6v1d	6.0841	-0.3134	0.113194	-2.76869	0.00562815	0.0461985
Leo1	1.70841	-0.59402	0.214562	-2.76852	0.00563114	0.0461985
Cpne8	1.49954	0.669903	0.24208	2.76728	0.00565262	0.046335
Atg4d	0.668545	-0.841594	0.304281	-2.76585	0.00567752	0.0464806
Cdc42ep2	1.01905	-0.72025	0.260436	-2.76556	0.00568254	0.0464806
Eef1e1	2.4585	-0.48945	0.176989	-2.76542	0.00568495	0.0464806
March6	5.86993	-0.319406	0.115536	-2.76455	0.00570009	0.0465645
Herpud1	1.54479	-0.593064	0.214757	-2.76155	0.00575268	0.0469541
Neurl1b	1.50177	0.610417	0.221179	2.75983	0.00578319	0.0471458
Cops7b	0.589078	-0.891179	0.32293	-2.75967	0.00578603	0.0471458
S100a1	1.53284	-0.601592	0.218078	-2.75861	0.00580484	0.0472349
Prpf40b	1.60047	-0.578618	0.209759	-2.75849	0.00580685	0.0472349
Rnf227	3.25602	-0.420664	0.15257	-2.7572	0.00582994	0.0473825
BC051226	0.954641	-0.756071	0.274279	-2.75657	0.00584108	0.0474272
Emc10	7.22138	-0.311177	0.112895	-2.75633	0.00584536	0.0474272
Zfp37	0.42727	-1.06887	0.387879	-2.75567	0.00585728	0.0474331
Fdft1	4.41283	0.398181	0.144502	2.75553	0.00585968	0.0474331
Iscu	3.24347	-0.430301	0.156177	-2.75521	0.00586544	0.0474331
Inafm2	0.985102	-0.751768	0.272877	-2.75498	0.00586965	0.0474331
Btbd7	0.448046	-1.02758	0.373	-2.75491	0.00587088	0.0474331
Inpp5f	4.25583	0.43565	0.158197	2.75385	0.00588985	0.0475463
Fcer1g	0.572467	-1.00698	0.365869	-2.7523	0.00591791	0.0477117
Midn	0.845244	-0.828301	0.300964	-2.75216	0.00592033	0.0477117
Trpm3	2.84382	-0.447599	0.16277	-2.74989	0.00596155	0.0480035
Msi1	0.400997	-1.01139	0.367934	-2.74885	0.00598047	0.0481153
Madd	4.09669	-0.386342	0.140574	-2.74831	0.00599032	0.0481541
Ei24	2.58964	-0.457792	0.166615	-2.7476	0.00600327	0.0482177
Atg101	1.61083	-0.584954	0.213008	-2.74615	0.00602983	0.0483904
Sall1	0.354117	-1.09094	0.397436	-2.74494	0.0060522	0.0485292
Clba1	0.813615	-0.797753	0.290846	-2.74287	0.00609045	0.048795
Eef1akmt1	2.44765	-0.461393	0.168269	-2.742	0.00610663	0.0488837
Coro6	0.302031	-1.11101	0.405344	-2.7409	0.00612705	0.0490062
Pak6	2.81693	0.501777	0.183178	2.73929	0.00615727	0.0491542
Psmd4	2.92695	-0.442806	0.161654	-2.73922	0.00615844	0.0491542
Zfand6	2.20089	-0.507831	0.185401	-2.73909	0.00616097	0.0491542
Zbtb37	0.433376	-0.988249	0.360854	-2.73864	0.00616939	0.0491563
F3	0.755698	-0.879817	0.321295	-2.73834	0.006175	0.0491563
Pnn	1.94044	-0.518469	0.189343	-2.73825	0.00617665	0.0491563
2310009B15Rik	1.5998	-0.5897	0.215516	-2.73622	0.0062149	0.0494196
Ppcdc	0.374959	-1.12255	0.410699	-2.73327	0.00627096	0.0498239
Bbc3	1.02716	0.737309	0.269849	2.73231	0.00628925	0.0499278
Adap1	10.8625	-0.289845	0.106094	-2.73198	0.00629555	0.0499363
Cryab	3.9356	-0.469822	0.172087	-2.73014	0.0063308	0.0501697
Krt10	2.14176	-0.51466	0.188527	-2.72989	0.00633546	0.0501697
2310039H08Rik	1.11114	-0.702277	0.257598	-2.72626	0.00640573	0.0506842
Chrd	0.805543	-0.80787	0.296573	-2.72402	0.00644924	0.0509863
Scamp1	5.95072	-0.335985	0.123369	-2.72342	0.00646104	0.0510202
Kcnj10	2.21182	-0.5119	0.187974	-2.72326	0.0064642	0.0510202
Lrrc28	1.06739	-0.739925	0.272046	-2.71985	0.00653113	0.0514459
Zfyve21	0.514248	-0.927712	0.341109	-2.71969	0.00653425	0.0514459
Sgk1	2.29583	-0.481492	0.177039	-2.71969	0.00653426	0.0514459
Etfrf1	0.400684	-0.973572	0.358134	-2.71845	0.00655876	0.0515963
Gm14305	1.161	-0.663935	0.244316	-2.71753	0.00657717	0.0516986
2900026A02Rik	2.21954	-0.508519	0.187222	-2.71613	0.00660504	0.0518751
Rfx1	0.555687	-0.920818	0.339225	-2.71447	0.00663811	0.052059
Mon2	1.30586	-0.651434	0.239991	-2.71441	0.00663935	0.052059
Nfil3	0.44759	-0.965259	0.356069	-2.71087	0.00671063	0.0525748
Prdx1	9.65097	-0.262124	0.0967179	-2.71019	0.00672439	0.0526396
Txnl4a	3.1416	-0.428232	0.158155	-2.70768	0.00677558	0.0529969
Fmnl2	0.928545	-0.75106	0.27747	-2.70682	0.00679315	0.0530909
Sumo2	15.1124	-0.251463	0.0929094	-2.70654	0.00679881	0.0530917
Asb13	1.56666	-0.580843	0.214671	-2.70574	0.00681528	0.053177
Elof1	3.29468	-0.414318	0.153248	-2.70359	0.00685958	0.053479
Fam162a	2.36644	-0.474691	0.17564	-2.70264	0.00687917	0.0535881
Myo1b	1.4751	0.620932	0.230048	2.69914	0.00695191	0.0541107
Timm8b	12.2707	-0.259014	0.096023	-2.69742	0.00698793	0.0543066
Cacna2d3	0.750575	-0.782548	0.290113	-2.69739	0.00698844	0.0543066
Mat2a	4.6744	-0.349913	0.129783	-2.69615	0.00701471	0.0544145
Apbb2	1.11097	-0.677998	0.251487	-2.69596	0.00701862	0.0544145
Farp1	2.96824	0.432763	0.160525	2.69592	0.0070194	0.0544145
Wbp2	7.34933	-0.294775	0.109608	-2.68936	0.00715887	0.0553726
Psap	27.021	-0.20471	0.0761195	-2.68933	0.00715963	0.0553726
Cd81	8.6984	-0.313901	0.116722	-2.68929	0.00716035	0.0553726
Arg2	0.426889	-0.98066	0.365134	-2.68575	0.00723671	0.0559179
Mbd6	0.710654	-0.808137	0.301204	-2.68303	0.00729594	0.0563118
Nvl	0.810611	-0.784643	0.292465	-2.68286	0.00729946	0.0563118
Mir670hg	0.622703	0.838639	0.312718	2.68177	0.00732329	0.0564501
Thap1	0.460424	-0.991198	0.369809	-2.6803	0.00735563	0.0566537
Stmn1	101.33	0.189542	0.0707271	2.6799	0.00736439	0.0566756
Dnaja3	1.50949	-0.593882	0.221711	-2.67864	0.00739228	0.0568445
4930453N24Rik	0.787142	-0.789512	0.294861	-2.67758	0.00741569	0.0568891
Rsrp1	6.43977	-0.303948	0.113517	-2.67756	0.00741615	0.0568891
Tmem59l	3.21287	-0.40254	0.150352	-2.67732	0.0074213	0.0568891
Zc3h3	0.443725	-0.950106	0.35488	-2.67726	0.00742275	0.0568891
2210016L21Rik	5.87609	-0.327428	0.12231	-2.67703	0.00742781	0.0568891
Xab2	0.72462	-0.822752	0.307392	-2.67656	0.00743826	0.0569235
Nde1	0.410591	-1.01372	0.378905	-2.6754	0.00746392	0.0570742
Mycl	0.663643	-0.802263	0.29997	-2.67448	0.00748458	0.0571454
Nrip1	1.37678	-0.635117	0.237476	-2.67445	0.00748518	0.0571454
2900097C17Rik	16.3622	0.224564	0.0839946	2.67356	0.00750515	0.0572522
Gpr108	0.452233	-0.960854	0.359472	-2.67296	0.00751856	0.0573088
Kif21b	12.207	0.270352	0.101164	2.67241	0.00753082	0.0573479
Creld1	2.32799	-0.468617	0.175368	-2.6722	0.00753568	0.0573479
Ackr1	2.23647	0.511079	0.191296	2.67167	0.00754746	0.0573919
Snd1	2.08472	-0.508442	0.190436	-2.66989	0.00758764	0.0576516
Tmem63b	5.22887	-0.32552	0.121946	-2.66938	0.00759918	0.0576692
Rab5b	2.15209	-0.49122	0.184037	-2.66914	0.00760458	0.0576692
Cdip1	2.84354	-0.427204	0.160064	-2.66896	0.00760874	0.0576692
D630045J12Rik	1.05203	0.718171	0.269107	2.66872	0.00761407	0.0576692
Slc2a1	0.716413	-0.846547	0.317255	-2.66835	0.00762253	0.0576876
Ccdc80	0.631724	-0.888072	0.332875	-2.66789	0.00763299	0.0577211
Abi2	5.84469	0.327308	0.122721	2.66708	0.00765128	0.0578137
Tmco3	0.699541	-0.839205	0.314687	-2.66679	0.0076579	0.0578181
Vstm2l	18.8908	-0.255387	0.095896	-2.66316	0.007741	0.0583994
Dhx33	0.527834	-0.908781	0.341295	-2.66274	0.00775073	0.0584267
Pmp22	0.442377	-0.972485	0.365341	-2.66185	0.00777116	0.0585346
Zfp711	0.64818	0.86031	0.323329	2.66079	0.00779586	0.0586744
Dhx9	1.66477	-0.574024	0.215793	-2.66007	0.00781238	0.0587261
Cetn3	6.72787	-0.320481	0.120483	-2.65996	0.007815	0.0587261
Tpst1	1.35595	-0.61314	0.230571	-2.65923	0.00783206	0.0588081
Rad23b	3.55787	-0.377689	0.14206	-2.65867	0.00784499	0.0588589
Iah1	1.15014	0.651461	0.24511	2.65783	0.00786451	0.0589592
Acad8	0.722592	-0.811813	0.305589	-2.65655	0.00789451	0.0591377
Itm2c	4.3085	-0.348992	0.131427	-2.65541	0.00792123	0.0592914
A830018L16Rik	2.93376	0.455615	0.171727	2.65314	0.00797468	0.0596449
Htatsf1	2.42966	-0.467511	0.176368	-2.65077	0.00803074	0.0599885
Nectin1	1.91912	-0.513385	0.193698	-2.65044	0.00803877	0.0599885
Sipa1l1	1.24399	-0.620268	0.234027	-2.65041	0.00803944	0.0599885
Coa3	8.62891	-0.272329	0.102822	-2.64856	0.00808357	0.0602708
Arxes2	3.31611	0.423246	0.159861	2.64759	0.00810686	0.0603366
Cygb	0.466814	-0.932957	0.352423	-2.64727	0.00811455	0.0603366
Mpi	1.75516	-0.537517	0.203049	-2.64723	0.00811534	0.0603366
BC029722	1.83956	-0.518932	0.196035	-2.64714	0.00811762	0.0603366
Mthfd1l	0.473	-0.950068	0.359092	-2.64575	0.00815095	0.0605372
Gtf3c6	1.15365	-0.711733	0.269304	-2.64286	0.00822095	0.0610098
Timp2	4.31639	0.389297	0.147326	2.64242	0.00823147	0.0610334
Atp6v1g1	8.72696	-0.291528	0.110335	-2.6422	0.00823689	0.0610334
Eif4e2	1.79988	-0.516119	0.195399	-2.64136	0.00825748	0.0611386
Slc22a23	1.97293	-0.506241	0.191687	-2.64098	0.00826673	0.0611598
Smc1a	1.32262	-0.628412	0.238019	-2.64017	0.00828644	0.0612582
Sptan1	18.9357	0.229063	0.0868869	2.63634	0.00838053	0.0619059
Hnrnpa2b1	17.4777	-0.2182	0.082795	-2.63542	0.00840323	0.0620257
Irf3	0.649978	-0.848644	0.322116	-2.63459	0.0084238	0.0621296
Ran	9.80006	-0.264862	0.100569	-2.63364	0.00844758	0.0622569
Rwdd1	2.71243	-0.426048	0.161926	-2.63113	0.0085102	0.0626702
Hs1bp3	0.319717	-1.07124	0.407623	-2.62803	0.0085882	0.063196
Rims4	2.09814	-0.488597	0.185957	-2.62747	0.00860229	0.063251
Tmem121	1.58759	-0.558498	0.212587	-2.62715	0.00861042	0.0632621
Kat14	0.710841	-0.857791	0.326733	-2.62535	0.00865592	0.0635476
Pde4dip	3.90803	0.408135	0.155564	2.62359	0.00870095	0.063796
Lage3	2.11725	-0.493799	0.188221	-2.6235	0.0087031	0.063796
Ahi1	4.06541	0.41161	0.156949	2.62257	0.0087269	0.0638857
Rnasek	11.5511	0.25688	0.0979523	2.6225	0.00872868	0.0638857
Syt16	3.0065	0.418238	0.159511	2.62199	0.0087417	0.063932
Ube2a	2.76279	-0.427569	0.163129	-2.62104	0.00876614	0.0640618
Smim12	2.53298	-0.442223	0.168804	-2.61975	0.00879947	0.0642359
Ocel1	2.03866	-0.503464	0.192191	-2.6196	0.0088034	0.0642359
Pmepa1	2.33226	-0.461461	0.176362	-2.61656	0.0088821	0.064713
Gm3764	3.87791	-0.390802	0.149358	-2.61655	0.00888231	0.064713
Dvl3	1.76453	-0.530397	0.202757	-2.61593	0.00889849	0.0647379
Saal1	0.47146	-0.922133	0.352562	-2.61552	0.00890914	0.0647379
Adgrb1	6.65774	-0.316298	0.120935	-2.61544	0.00891137	0.0647379
Gzf1	0.411192	-0.965337	0.3691	-2.61538	0.0089128	0.0647379
Tmem150c	1.1306	0.665432	0.254469	2.61499	0.00892307	0.0647633
Abhd10	0.554845	-0.868723	0.33231	-2.61419	0.0089439	0.0648653
Acox1	3.94952	-0.377941	0.144623	-2.6133	0.00896737	0.0649862
Atg2a	1.10823	-0.670595	0.256662	-2.61276	0.00898152	0.0650395
Arrdc4	1.11386	-0.672308	0.257362	-2.61231	0.0089934	0.0650763
Rhbdl1	4.90845	-0.334966	0.128289	-2.61103	0.00902703	0.0652703
Rit2	1.3767	0.621074	0.238028	2.60924	0.00907424	0.0655508
P2ry12	0.84102	-0.809039	0.31009	-2.60905	0.00907953	0.0655508
Lsm14a	1.17451	-0.670054	0.256879	-2.60844	0.00909565	0.0656176
Mettl23	1.53693	-0.566829	0.217342	-2.60801	0.00910706	0.0656205
Decr1	0.399891	-0.989097	0.379299	-2.6077	0.0091153	0.0656205
Mdh2	10.8633	-0.255924	0.0981436	-2.60765	0.00911666	0.0656205
Fasn	9.32801	0.255342	0.0979301	2.60739	0.00912348	0.0656205
Unc93b1	0.377726	-1.02535	0.393309	-2.60699	0.00913417	0.065648
Fibp	1.80019	-0.527908	0.202637	-2.60519	0.00918232	0.0659445
1110032A03Rik	1.2776	-0.628238	0.241181	-2.60485	0.00919158	0.0659615
Ywhaz	44.0252	-0.189604	0.072814	-2.60395	0.00921574	0.0660853
Myo9b	1.103	-0.66911	0.257067	-2.60286	0.00924485	0.0662067
Rnf19a	1.06474	-0.68177	0.261945	-2.60272	0.00924872	0.0662067
Mrpl58	3.00726	-0.42432	0.16304	-2.60255	0.00925343	0.0662067
Gtf2h4	0.380846	-0.985343	0.378684	-2.60202	0.00926761	0.0662585
Swi5	12.6545	-0.236712	0.091017	-2.60074	0.00930224	0.0664565
Slc1a3	6.36236	-0.393164	0.151194	-2.60039	0.00931175	0.0664747
Ssu72	5.70436	-0.307656	0.118353	-2.59948	0.00933643	0.0666013
Cplx2	5.00601	0.363983	0.140053	2.59889	0.00935259	0.0666668
Nr3c1	1.0268	-0.687044	0.264484	-2.59767	0.00938582	0.0668539
Ptdss2	1.93731	-0.529836	0.204047	-2.59664	0.00941411	0.0669439
Egfl7	1.44137	-0.672	0.258822	-2.59638	0.0094212	0.0669439
Map3k2	0.625239	-0.842078	0.32437	-2.59604	0.00943058	0.0669439
Adgrb2	7.18612	-0.293738	0.113154	-2.5959	0.00943422	0.0669439
Tenm2	1.5207	0.587793	0.226462	2.59555	0.00944395	0.0669439
Herc4	0.820494	-0.764926	0.294715	-2.59547	0.00944609	0.0669439
Abracl	1.77316	-0.522318	0.201246	-2.59542	0.00944745	0.0669439
Rxrb	1.94818	-0.503002	0.193868	-2.59455	0.0094714	0.067064
Dap3	2.43319	-0.453881	0.174956	-2.59426	0.00947944	0.0670713
9530068E07Rik	2.0625	-0.558134	0.215176	-2.59385	0.00949081	0.0671021
Uqcrfs1	7.96153	-0.300978	0.116074	-2.59298	0.00951486	0.0672224
Ppp1cc	5.62398	-0.320213	0.12357	-2.59135	0.00956014	0.0674925
Fam98c	0.704458	-0.822861	0.317604	-2.59084	0.0095741	0.0675412
Kazn	0.872838	-0.722617	0.279119	-2.58892	0.00962769	0.0678692
Skp1a	7.44977	-0.303768	0.117376	-2.58799	0.00965391	0.0680039
Gpr153	1.38158	0.618577	0.239065	2.58749	0.00966784	0.0680278
Gcdh	0.707807	-0.807919	0.312256	-2.58736	0.00967153	0.0680278
Cdc42se1	2.24064	-0.505271	0.195307	-2.58705	0.00968002	0.0680375
Fam91a1	1.23446	-0.646503	0.249925	-2.58679	0.00968752	0.06804
Gas7	3.23883	-0.387109	0.149663	-2.58654	0.0096946	0.06804
E2f5	0.440967	-0.910405	0.352164	-2.58518	0.00973292	0.0682589
1500009C09Rik	2.45141	-0.444655	0.172068	-2.58418	0.00976122	0.0684072
Mospd2	0.414752	-0.964003	0.373111	-2.58369	0.00977505	0.068454
Prrt3	0.775872	-0.785963	0.304255	-2.58324	0.00978775	0.0684571
Nfyc	1.66045	-0.548192	0.212217	-2.58317	0.00978981	0.0684571
Mllt6	1.03595	-0.688109	0.266499	-2.58203	0.00982201	0.0686321
Smarca4	4.55434	-0.362251	0.140311	-2.58177	0.00982942	0.0686338
Myo5a	5.44327	0.372957	0.14451	2.58084	0.009856	0.0687692
Cntn1	10.641	0.243862	0.0946211	2.57725	0.00995912	0.069438
2300009A05Rik	2.30845	-0.471407	0.182965	-2.57649	0.00998092	0.0695393
Vcp	10.1388	-0.25585	0.0993118	-2.57623	0.00998837	0.0695406
Acap2	1.07937	-0.659504	0.256114	-2.57504	0.0100227	0.069729
Fmnl1	1.25646	-0.60342	0.234377	-2.57457	0.0100366	0.0697357
Dynll2	8.24001	-0.28795	0.111847	-2.57451	0.0100383	0.0697357
Kcnmb4	4.88527	0.346848	0.134744	2.57413	0.0100491	0.0697605
Cct7	6.1942	-0.291302	0.113189	-2.57358	0.0100651	0.069821
Cobl	0.670847	0.793872	0.308537	2.57302	0.0100815	0.0698839
Ifngr2	3.06279	-0.399837	0.155468	-2.57183	0.0101163	0.0700743
Pqlc2	0.393325	-1.14513	0.445557	-2.57012	0.0101665	0.0703707
Kcnip3	0.517972	-0.861491	0.335234	-2.56982	0.0101752	0.0703801
Pitpnm1	4.01101	-0.377279	0.146982	-2.56683	0.0102632	0.0709375
Mb21d2	3.28988	-0.40261	0.156866	-2.56658	0.0102706	0.0709375
Dus1l	0.867482	-0.738888	0.287924	-2.56626	0.0102801	0.0709522
Comtd1	1.43008	-0.578855	0.225661	-2.56515	0.0103131	0.0711285
Bcl2l13	0.745245	-0.793573	0.309398	-2.5649	0.0103207	0.0711295
Gm32031	0.457978	-0.901115	0.351705	-2.56213	0.0104031	0.0716458
Mfap2	0.463216	-0.898027	0.350648	-2.56105	0.0104356	0.0717912
Tle5	13.2915	-0.239768	0.0936255	-2.56093	0.0104392	0.0717912
Fh1	2.92519	-0.394947	0.154254	-2.56038	0.0104559	0.0718542
Eef1d	2.43295	-0.432623	0.16904	-2.55929	0.0104886	0.0719862
C1ql1	0.513307	-0.896691	0.350374	-2.55924	0.0104902	0.0719862
Vat1l	0.74989	0.774278	0.302572	2.55899	0.0104978	0.0719868
Miip	0.359911	-0.974965	0.381451	-2.55594	0.0105903	0.0725692
Erc1	1.69931	0.53444	0.209249	2.55409	0.0106465	0.0729024
Cox19	2.67154	-0.452536	0.177256	-2.553	0.0106798	0.0730783
Pou3f2	0.980733	0.699938	0.274488	2.54997	0.0107732	0.07364
Slc50a1	0.796124	-0.748171	0.293419	-2.54984	0.0107773	0.07364
Fabp5	34.44	-0.190111	0.0745973	-2.5485	0.0108187	0.0738427
Epha4	6.66619	0.307672	0.120732	2.54838	0.0108224	0.0738427
Immt	2.9275	-0.398084	0.156282	-2.54721	0.0108588	0.0740382
Etl4	0.727034	-0.798528	0.313634	-2.54605	0.010895	0.0742003
Ubxn6	2.48022	-0.429664	0.168764	-2.54595	0.0108981	0.0742003
Pde4b	1.52667	0.580934	0.22827	2.54494	0.0109296	0.0743614
Fbxw2	2.45976	-0.452051	0.17784	-2.5419	0.0110252	0.0749592
Mbd3	3.91263	-0.351712	0.138421	-2.54089	0.011057	0.0751214
Shfl	1.16502	-0.662576	0.260869	-2.53988	0.011089	0.0752706
Kcnn1	1.15636	0.654346	0.257647	2.5397	0.0110947	0.0752706
Nkapd1	0.748357	-0.756363	0.297891	-2.53906	0.011115	0.0753211
Prelid1	9.25493	-0.267574	0.105387	-2.53897	0.0111179	0.0753211
Ccdc136	4.22397	-0.364797	0.143695	-2.53869	0.0111268	0.0753282
Memo1	1.91474	-0.510959	0.201375	-2.53736	0.0111693	0.0755421
Slc12a5	7.34587	-0.283618	0.111784	-2.5372	0.0111742	0.0755421
Akap5	0.967307	0.670014	0.264114	2.53683	0.011186	0.0755635
Rtn4rl1	2.01434	-0.49363	0.194602	-2.53661	0.0111931	0.0755635
Arhgef17	1.53307	-0.560027	0.220811	-2.53623	0.0112054	0.0755663
Usp29	0.593249	0.790403	0.31166	2.5361	0.0112093	0.0755663
Slx1b	0.656611	-0.792579	0.31262	-2.53528	0.0112359	0.0756919
Phyh	2.656	0.433746	0.171198	2.5336	0.0112897	0.0760008
Gm12166	0.403814	0.959891	0.37902	2.53256	0.0113233	0.0761737
H2-Ke6	0.919733	-0.712115	0.281262	-2.53186	0.011346	0.0762725
Plrg1	0.886554	-0.720558	0.284685	-2.53107	0.0113714	0.0763897
Pcdh11x	0.877934	0.784003	0.310017	2.5289	0.011442	0.0768101
Surf6	0.466768	-0.906525	0.358806	-2.52651	0.0115202	0.077281
Extl2	2.49872	-0.42699	0.169038	-2.526	0.0115368	0.077338
Daam1	2.38951	0.46158	0.182894	2.52375	0.0116109	0.0777803
Fads1	4.2272	-0.336974	0.133543	-2.52333	0.0116248	0.0777822
Cinp	2.06975	-0.467568	0.185307	-2.5232	0.0116292	0.0777822
Ldha	17.3757	-0.225841	0.0895126	-2.52301	0.0116356	0.0777822
Kcna6	1.27457	-0.594121	0.235532	-2.52246	0.0116536	0.0777984
Tspan31	1.98497	-0.484926	0.192245	-2.52244	0.0116543	0.0777984
Cnih4	0.534131	-0.859039	0.340738	-2.52111	0.0116984	0.0779973
Smim19	1.60274	-0.545129	0.216241	-2.52093	0.0117046	0.0779973
Arl4c	1.84591	-0.485417	0.19257	-2.52073	0.0117112	0.0779973
Rnf6	1.04909	-0.668138	0.265106	-2.52027	0.0117266	0.0779973
Hspa9	4.79517	-0.318742	0.126476	-2.52018	0.0117296	0.0779973
Stip1	3.0267	-0.397768	0.15784	-2.52007	0.011733	0.0779973
Wdyhv1	0.284787	-1.06003	0.420702	-2.51966	0.0117467	0.0780343
Rnf187	13.0449	-0.243032	0.0964685	-2.51929	0.0117592	0.0780628
Ankrd24	1.30709	-0.590224	0.234448	-2.5175	0.011819	0.0784055
Eif5a	18.0739	-0.217664	0.0865007	-2.51632	0.0118587	0.0786141
Snap91	13.1096	0.238782	0.0949377	2.51514	0.0118984	0.078784
Mtg1	0.821469	-0.721477	0.286861	-2.51507	0.0119008	0.078784
Ddr1	0.855041	0.724275	0.288037	2.51452	0.0119193	0.0788522
Pgs1	2.42361	-0.450444	0.179164	-2.51414	0.0119324	0.0788842
Ckmt1	3.92407	-0.360392	0.143363	-2.51384	0.0119425	0.0788966
Sdc3	8.31235	0.278258	0.110725	2.51306	0.0119688	0.0790156
Polr3a	0.472746	-0.886034	0.353017	-2.50989	0.0120768	0.0796721
Tmem167b	0.451715	-0.88416	0.352303	-2.50966	0.0120849	0.0796721
Synpr	2.86021	0.603459	0.240551	2.50865	0.0121192	0.0797938
Ptges2	1.59958	-0.531175	0.211739	-2.50863	0.0121201	0.0797938
Nap1l3	1.36631	0.590598	0.235521	2.50762	0.0121546	0.0799661
Yju2	0.358283	-0.955895	0.38144	-2.50602	0.01221	0.0802757
Uchl5	1.71303	-0.623319	0.248873	-2.50457	0.0122601	0.0805492
Snph	1.97233	-0.470216	0.187873	-2.50283	0.0123203	0.0808463
Gsn	1.0365	-0.78406	0.313276	-2.50278	0.0123222	0.0808463
Bmp2k	0.283501	-1.1085	0.44322	-2.50102	0.0123836	0.0811936
Prkar1b	9.38236	0.279065	0.111598	2.50062	0.0123975	0.081229
Apln	0.558676	-0.89844	0.359381	-2.49997	0.0124205	0.0813063
Slc39a11	0.520533	-0.852305	0.340949	-2.4998	0.0124263	0.0813063
Anp32a	1.96567	-0.461483	0.184666	-2.49901	0.0124541	0.0814329
Med27	1.10531	-0.643099	0.257416	-2.49829	0.0124793	0.0815417
Cdk2ap1	2.08627	-0.46106	0.184582	-2.49786	0.0124947	0.0815762
Lig3	0.664788	-0.791411	0.316882	-2.4975	0.0125074	0.0815762
Neo1	3.30751	0.42185	0.168914	2.49742	0.0125102	0.0815762
Stk25	1.83331	0.513944	0.205892	2.49618	0.0125538	0.0818052
Rad9a	0.33262	-1.00342	0.402053	-2.49575	0.012569	0.081848
Dnajb9	0.701815	-0.758886	0.30433	-2.49363	0.0126445	0.0822626
Tepsin	0.695267	-0.796533	0.319455	-2.49342	0.0126521	0.0822626
Wscd2	0.717143	-0.776828	0.311575	-2.49322	0.0126589	0.0822626
Zscan26	0.497907	-0.877403	0.352015	-2.49251	0.0126842	0.0822626
Gna13	0.851102	-0.727048	0.291702	-2.49243	0.0126871	0.0822626
Gm14296	0.78346	-0.742512	0.297922	-2.4923	0.0126919	0.0822626
Nr1d2	1.7075	-0.531541	0.213291	-2.49209	0.0126994	0.0822626
Cx3cr1	0.288409	-1.11268	0.446493	-2.49203	0.0127014	0.0822626
Irf9	0.438809	-0.932472	0.374594	-2.48929	0.0127998	0.0828437
H2afj	3.84021	-0.356772	0.143383	-2.48825	0.0128374	0.0830307
Gm3510	0.385178	-0.988029	0.397198	-2.4875	0.0128645	0.0831497
Srcin1	2.96687	0.415001	0.166916	2.48629	0.0129083	0.0833335
Fxyd5	1.02016	-0.670824	0.269835	-2.48605	0.0129169	0.0833335
Cartpt	0.750257	-0.94057	0.378393	-2.4857	0.0129298	0.0833335
H2afz	14.7111	-0.228148	0.0917879	-2.4856	0.0129334	0.0833335
Tbck	0.882436	-0.702359	0.282581	-2.48551	0.0129365	0.0833335
Sertad2	0.518515	-0.862498	0.347109	-2.48481	0.0129622	0.083353
Man1b1	0.993681	-0.6826	0.274755	-2.48439	0.0129773	0.083353
Nf1	0.397323	-0.91291	0.367472	-2.4843	0.0129808	0.083353
Eef1b2	9.93667	0.249138	0.100286	2.48427	0.0129816	0.083353
Fbxo7	0.451271	-0.917119	0.369207	-2.48403	0.0129906	0.083353
Abat	2.6187	-0.405679	0.163317	-2.48399	0.0129918	0.083353
Dpysl2	17.3119	-0.236334	0.0951526	-2.48373	0.0130013	0.0833585
Abhd12	3.77221	-0.349257	0.140733	-2.4817	0.0130758	0.08378
Tmem131	1.89061	-0.47955	0.193281	-2.4811	0.0130977	0.0838641
Rnf141	2.11265	0.475243	0.191589	2.48054	0.0131185	0.0839409
Chmp1a	2.47756	-0.414745	0.167226	-2.48015	0.0131327	0.0839754
Tomm5	5.88308	-0.295053	0.119048	-2.47844	0.0131959	0.0843126
Glrx5	4.96787	-0.324827	0.131071	-2.47824	0.013203	0.0843126
Chchd7	1.3622	-0.576732	0.232743	-2.47798	0.0132128	0.0843187
Apba2	2.09533	0.49422	0.199464	2.47774	0.0132218	0.0843196
Arl8b	3.98926	-0.339079	0.136869	-2.4774	0.0132342	0.084343
Tef	3.37054	-0.442177	0.178502	-2.47715	0.0132436	0.0843461
Ndfip1	34.1233	0.187632	0.0757606	2.47664	0.0132624	0.084375
Timm9	3.35454	-0.392181	0.158358	-2.47655	0.0132657	0.084375
Apoa1	0.342406	-1.1693	0.472202	-2.47626	0.0132766	0.0843882
Eng	0.374492	-0.97844	0.395253	-2.47548	0.0133059	0.0844999
Amdhd2	0.577921	-0.811816	0.327986	-2.47516	0.0133178	0.0844999
Tceal6	2.04175	-0.468583	0.189321	-2.47508	0.0133207	0.0844999
Gpn1	1.09853	-0.615911	0.248919	-2.47434	0.0133481	0.0846176
Mrps22	0.943553	-0.679332	0.274609	-2.47382	0.0133678	0.0846863
Sbk1	3.54297	0.37042	0.149825	2.47235	0.0134229	0.0849791
Sorbs2	1.71444	-0.500261	0.202368	-2.47203	0.0134347	0.0849974
Stk16	2.36325	-0.4319	0.174925	-2.46906	0.0135468	0.0855553
Pacs1	1.75594	0.593212	0.240263	2.46901	0.0135486	0.0855553
Psmg2	1.60059	-0.530127	0.214715	-2.46899	0.0135497	0.0855553
Sord	0.341433	-0.960182	0.389029	-2.46815	0.0135813	0.0856982
Eci1	0.407122	-0.895263	0.362801	-2.46764	0.0136006	0.0857637
Rab11a	7.33737	0.281011	0.113909	2.46699	0.0136253	0.0858355
Lrfn4	2.05417	-0.454225	0.18413	-2.46687	0.0136299	0.0858355
Isca2	1.73661	-0.498867	0.202274	-2.46629	0.0136521	0.0859187
Vamp3	0.682512	-0.806309	0.327179	-2.46443	0.0137233	0.0863094
Rnf144b	0.550027	-0.891322	0.361793	-2.46363	0.0137539	0.0864455
Edem2	0.606886	-0.767832	0.311736	-2.46309	0.0137747	0.0864807
Vsnl1	23.6281	-0.224972	0.0913403	-2.46301	0.0137776	0.0864807
Psat1	1.42211	-0.537209	0.218175	-2.46228	0.0138055	0.086584
Aldh2	0.977495	-0.644406	0.261729	-2.46211	0.0138122	0.086584
Armc2	0.527533	-0.862358	0.350332	-2.46154	0.013834	0.0866643
Gltp	0.431901	-0.87289	0.354704	-2.46089	0.0138591	0.0867646
Sh3bgrl2	0.301794	-1.08869	0.44267	-2.45938	0.0139178	0.0870751
Otud7a	0.510247	-0.866869	0.352668	-2.45803	0.0139701	0.0873452
Slc8a2	1.5005	-0.543117	0.22103	-2.45721	0.0140019	0.0874869
Chpf	2.82901	-0.41567	0.169224	-2.45633	0.0140364	0.0876453
Vapb	2.18945	-0.44067	0.17947	-2.4554	0.0140728	0.0878151
Myo10	0.72086	-0.787581	0.320837	-2.45477	0.0140974	0.0878537
Smarca1	1.08638	0.664479	0.270704	2.45463	0.0141028	0.0878537
Ubr1	0.874204	-0.703104	0.286451	-2.45454	0.0141066	0.0878537
Flna	3.20878	-0.40456	0.16485	-2.45411	0.0141232	0.0879002
Tnrc18	1.90907	-0.47092	0.191912	-2.45383	0.0141344	0.0879126
Klf15	0.397828	-0.908766	0.370445	-2.45318	0.0141601	0.0879609
Rnf112	3.19711	-0.390464	0.159182	-2.45294	0.0141693	0.0879609
Mylip	1.42291	-0.542068	0.220988	-2.45293	0.0141697	0.0879609
Utp14a	0.402614	-0.90549	0.369269	-2.45212	0.0142018	0.0880553
Scn2b	1.41318	-0.559153	0.228042	-2.45197	0.0142075	0.0880553
Gm1673	17.0305	-0.218942	0.0892969	-2.45185	0.0142126	0.0880553
Ube3b	2.01597	-0.464174	0.189486	-2.44965	0.0142994	0.0885362
Fbl	2.26537	-0.507044	0.207011	-2.44936	0.0143111	0.0885511
Ebna1bp2	1.28021	-0.569238	0.232494	-2.44839	0.0143494	0.0887309
Nudt21	2.70921	-0.401071	0.163865	-2.44756	0.0143825	0.0888339
Hexb	1.94041	-0.552924	0.225913	-2.44751	0.0143847	0.0888339
Kcnj11	0.387522	-0.955663	0.390603	-2.44664	0.0144197	0.0889357
Atrnl1	3.92475	-0.339275	0.138679	-2.44647	0.0144264	0.0889357
Msmo1	2.87507	-0.392909	0.160616	-2.44626	0.0144347	0.0889357
Ncbp2	1.99824	-0.467738	0.191213	-2.44617	0.0144383	0.0889357
Cystm1	2.20607	-0.445882	0.182399	-2.44454	0.0145039	0.089282
Sall2	0.874862	-0.674763	0.276159	-2.44338	0.0145502	0.0895097
Pick1	2.12072	-0.460063	0.188396	-2.44201	0.0146059	0.0897492
Chmp5	3.37	-0.377988	0.154802	-2.44175	0.0146161	0.0897492
Asxl2	0.301138	-1.10211	0.451365	-2.44172	0.0146173	0.0897492
Sdad1	0.363149	-0.894276	0.366347	-2.44106	0.0146441	0.0898562
Rere	1.67595	-0.496313	0.203374	-2.4404	0.014671	0.0899463
Sco2	0.742952	-0.742343	0.304209	-2.44024	0.0146776	0.0899463
Snhg10	0.523656	-0.841658	0.34504	-2.43931	0.0147155	0.0901204
Sharpin	1.50123	-0.558403	0.22899	-2.43854	0.0147466	0.0902531
Scaper	0.828066	0.679617	0.278794	2.4377	0.0147811	0.0904064
Spry1	0.411231	-1.0078	0.413674	-2.43622	0.0148418	0.09072
Tor2a	0.957934	-0.677535	0.278167	-2.43571	0.0148624	0.0907878
Wdr37	1.0748	-0.619125	0.254296	-2.43466	0.0149057	0.090994
Dusp6	1.73053	0.528487	0.217089	2.43442	0.0149156	0.0909965
Tbata	0.29051	-1.17455	0.482547	-2.43405	0.0149308	0.091031
Commd4	4.00205	-0.341271	0.14023	-2.43365	0.0149472	0.0910734
Lsg1	0.479245	-0.862203	0.354328	-2.43335	0.01496	0.0910764
Tmem109	1.19936	-0.597219	0.245458	-2.43308	0.0149711	0.0910764
Dock1	0.315423	-0.995841	0.409349	-2.43274	0.014985	0.0910764
Fyco1	0.59875	-0.817534	0.336057	-2.43272	0.0149858	0.0910764
Pik3c2b	0.387408	-0.902926	0.371277	-2.43195	0.0150178	0.091213
Ptgfrn	1.18028	0.604668	0.248755	2.43078	0.0150665	0.0914506
Rnd2	2.20748	-0.432184	0.17782	-2.43046	0.0150798	0.0914732
Rassf5	0.354805	-0.978323	0.402622	-2.42988	0.0151039	0.0915613
Nkiras1	3.7526	-0.360043	0.148225	-2.42902	0.0151396	0.0917194
Minar2	1.62397	0.531856	0.219023	2.42831	0.0151694	0.0918418
Rit1	1.54132	-0.520893	0.214579	-2.42752	0.0152026	0.0919496
Plcd3	0.349461	-0.908336	0.374197	-2.42743	0.0152064	0.0919496
Rps5	14.8961	0.208052	0.0857365	2.42664	0.0152393	0.0920629
Setdb1	1.38645	-0.546237	0.225111	-2.42652	0.0152444	0.0920629
Aktip	1.08832	-0.610491	0.251804	-2.42447	0.0153308	0.0925263
Btbd9	1.13529	-0.594753	0.245622	-2.42142	0.01546	0.0932476
Mrps14	2.39714	-0.41407	0.17102	-2.42118	0.0154704	0.0932515
A330023F24Rik	0.295694	-1.0754	0.444384	-2.41998	0.0155212	0.0934082
Akap6	3.37976	-0.364501	0.150623	-2.41995	0.0155226	0.0934082
Plpp1	0.999328	0.621506	0.256837	2.41984	0.0155272	0.0934082
Ypel4	0.37475	-0.926993	0.383111	-2.41965	0.0155355	0.0934082
Baiap2l1	0.319475	-0.988088	0.408624	-2.41809	0.0156023	0.0937511
Mtg2	0.46772	-0.865479	0.358037	-2.41729	0.0156364	0.0938971
S100a10	4.1634	0.439089	0.181672	2.41693	0.015652	0.0939317
Rab3il1	0.333139	-1.09315	0.452398	-2.41634	0.0156773	0.0940245
Csnk2b	5.8522	-0.320755	0.13288	-2.41387	0.015784	0.094569
Nsmaf	0.896569	-0.696786	0.28867	-2.41378	0.0157879	0.094569
Rbm5	4.06914	-0.333473	0.138193	-2.41309	0.0158177	0.0946507
Ubiad1	0.370043	-0.913166	0.378434	-2.41301	0.0158213	0.0946507
Vps13a	0.626206	-0.784558	0.325171	-2.41276	0.0158323	0.0946573
Rgs5	1.82426	-0.708897	0.293906	-2.41199	0.0158658	0.0947987
Glrx2	4.14316	-0.323147	0.133999	-2.41157	0.015884	0.0948481
Ubtf	2.38979	-0.449173	0.186285	-2.41121	0.0158995	0.0948813
Ppcs	0.399142	-0.88996	0.369156	-2.41079	0.0159178	0.0949315
Cdk19	2.61886	-0.394527	0.16378	-2.40889	0.0160013	0.0953156
Gatc	0.736428	-0.710048	0.294764	-2.40887	0.0160022	0.0953156
Ttyh2	0.399839	-0.908009	0.377345	-2.40631	0.0161147	0.095926
Brpf1	0.413156	-0.869479	0.361583	-2.40464	0.0161883	0.0963042
Hmox2	2.48681	-0.403981	0.168033	-2.40418	0.0162088	0.0963664
BC005537	7.06225	-0.263022	0.109423	-2.40372	0.0162291	0.0964191
Ipo13	1.69214	-0.497	0.20678	-2.40353	0.0162378	0.0964191
Sh3rf3	1.66119	-0.498083	0.207419	-2.40133	0.0163354	0.0969019
Caprin1	4.61444	0.330564	0.137664	2.40124	0.0163394	0.0969019
Ndufa8	7.06072	-0.274722	0.114445	-2.40047	0.016374	0.097047
Cdk5r1	7.32962	0.270043	0.112549	2.39933	0.016425	0.0972359
Zfp866	0.337626	-0.951051	0.396386	-2.39931	0.0164262	0.0972359
Dhrs3	0.368549	-0.939961	0.392045	-2.39759	0.0165035	0.0976007
Aldh1a1	0.313442	-1.04023	0.433883	-2.39748	0.0165082	0.0976007
Slc18a2	0.579633	-0.795942	0.332052	-2.39704	0.0165282	0.0976582
Pla2g4e	3.00232	-0.385114	0.160696	-2.39654	0.0165509	0.0977321
Cyb561	0.747904	-0.719391	0.300259	-2.3959	0.0165794	0.09784
Fgfrl1	0.422378	-0.855511	0.357232	-2.39483	0.016628	0.0980156
Tspan6	2.1247	0.450962	0.188309	2.39479	0.0166297	0.0980156
Tmem132d	0.591232	-0.798742	0.3336	-2.39431	0.0166518	0.0980785
Emc7	3.67841	-0.337773	0.141095	-2.39394	0.0166686	0.0980785
Cep131	0.692367	-0.758041	0.316658	-2.39388	0.0166711	0.0980785
Ncln	2.48596	-0.412082	0.172238	-2.39251	0.0167337	0.0983861
Cul4a	1.37416	-0.549195	0.229584	-2.39213	0.0167508	0.0984264
Nrn1	0.567186	-0.82037	0.343011	-2.39168	0.0167716	0.0984718
Pisd	1.08235	-0.611591	0.255734	-2.39151	0.0167791	0.0984718
Pnoc	0.424774	-0.904768	0.378396	-2.39106	0.0167996	0.0985317
Ppp3cb	14.1679	0.213317	0.0892752	2.38943	0.0168747	0.0988334
Parp2	0.84723	-0.689897	0.288731	-2.38941	0.0168755	0.0988334
Sdf4	3.03102	-0.390692	0.16352	-2.38927	0.0168821	0.0988334
Bex2	27.1782	-0.188733	0.0790065	-2.38884	0.0169019	0.0988889
Rpl29	10.6868	-0.244676	0.102442	-2.38844	0.0169201	0.0989348
Ilkap	1.94992	-0.46152	0.193265	-2.38801	0.0169399	0.0989849
Tm7sf3	1.27605	-0.561747	0.235256	-2.38781	0.0169493	0.0989849
Atf4	5.1017	-0.310592	0.130107	-2.38721	0.0169768	0.0990851
Tanc2	2.97699	-0.390626	0.163739	-2.38566	0.0170486	0.0994063
Taf11	1.5671	-0.52767	0.221192	-2.38557	0.0170527	0.0994063
Zeb1	0.465315	-0.830976	0.348398	-2.38513	0.0170729	0.0994376
Mapk1ip1	1.12319	-0.591872	0.248195	-2.3847	0.017093	0.0994376
Prelid3b	3.00247	-0.379594	0.15918	-2.38468	0.017094	0.0994376
Msrb1	1.6906	-0.488719	0.204952	-2.38456	0.0170996	0.0994376
Fdx2	2.9692	-0.370791	0.155724	-2.38108	0.0172618	0.100157
Nrsn2	1.16449	-0.621494	0.261048	-2.38077	0.0172766	0.100157
Unc13c	0.364749	-0.918612	0.385849	-2.38076	0.0172772	0.100157
Strn4	6.12352	-0.293919	0.123461	-2.38066	0.0172814	0.100157
Daglb	0.688351	-0.717537	0.301405	-2.38064	0.0172826	0.100157
Atf2	1.70121	0.502068	0.210903	2.38056	0.0172861	0.100157
Taldo1	4.19033	-0.333502	0.140256	-2.37781	0.0174159	0.100848
Dock7	1.94179	-0.492025	0.206996	-2.37697	0.0174553	0.100927
Car4	0.337541	-0.999417	0.420475	-2.37687	0.01746	0.100927
Rab31	1.91422	-0.464034	0.195231	-2.37685	0.0174612	0.100927
Tulp3	0.411999	-0.856082	0.36056	-2.37431	0.0175818	0.101538
Extl1	0.616343	-0.767926	0.323461	-2.37409	0.0175923	0.101538
Apcdd1	1.11354	-0.624884	0.263237	-2.37385	0.0176039	0.101538
Pabpc1	4.42709	0.346682	0.14605	2.37372	0.0176098	0.101538
Appl2	0.899116	-0.661666	0.278771	-2.37351	0.01762	0.101538
Tmem268	0.402774	-0.909631	0.383363	-2.37277	0.0176553	0.101659
Senp5	1.13925	-0.621218	0.261836	-2.37255	0.0176659	0.101659
Map3k10	3.15921	-0.397392	0.167507	-2.37239	0.0176734	0.101659
Trnp1	3.44503	-0.373703	0.157536	-2.37218	0.0176834	0.101659
Rplp2	20.8465	-0.187826	0.0791972	-2.37162	0.0177101	0.101719
Syt4	9.83283	-0.275675	0.116244	-2.37152	0.0177152	0.101719
Fam57b	4.07865	-0.335806	0.141659	-2.37052	0.0177629	0.101932
Fnip2	0.310697	-0.985562	0.415835	-2.37008	0.0177843	0.101993
Pcdh9	2.74716	0.415754	0.17546	2.36951	0.0178117	0.102089
Sfxn5	1.62621	-0.524194	0.221413	-2.36749	0.0179093	0.102572
Lnpep	0.912303	-0.627094	0.264896	-2.36732	0.0179174	0.102572
Lgals1	0.635955	0.744037	0.314358	2.36685	0.0179404	0.102642
St6galnac5	0.770107	0.729469	0.308247	2.36651	0.0179567	0.102673
Mybbp1a	1.215	-0.654385	0.276544	-2.36629	0.0179672	0.102673
Egr4	0.952245	0.635712	0.268725	2.36565	0.0179982	0.102774
Pan3	0.75459	-0.7402	0.312917	-2.36549	0.0180065	0.102774
Aspscr1	1.13197	-0.579498	0.245074	-2.36458	0.0180504	0.102963
Tma16	0.68378	-0.754192	0.319085	-2.36361	0.018098	0.103174
Tbc1d30	1.32115	-0.581306	0.246046	-2.36259	0.0181476	0.10334
Sh3gl2	10.1847	0.277231	0.117343	2.36257	0.0181487	0.10334
Adarb1	2.439	-0.424805	0.179841	-2.36212	0.0181708	0.103372
B3galt2	1.02065	0.611169	0.258784	2.3617	0.0181913	0.103372
Brd8	1.14889	-0.602206	0.255019	-2.36142	0.0182052	0.103372
Amz2	2.135	-0.460659	0.195091	-2.36125	0.0182137	0.103372
Fdxr	0.499937	-0.817077	0.346047	-2.36118	0.018217	0.103372
Plxnb1	1.12204	-0.594255	0.251712	-2.36085	0.018233	0.103372
Ttpal	1.43202	-0.546409	0.23147	-2.3606	0.0182454	0.103372
Jund	3.60401	-0.332965	0.141056	-2.36051	0.0182497	0.103372
Smg9	1.38628	-0.554599	0.234952	-2.36047	0.0182516	0.103372
Rab10	6.26437	0.287692	0.121895	2.36016	0.0182669	0.103397
Eid1	9.68674	0.262245	0.111138	2.35963	0.018293	0.103484
Nkd1	0.307894	-0.973865	0.412772	-2.35933	0.0183081	0.103508
Luc7l2	1.1227	-0.625562	0.26523	-2.35856	0.0183458	0.10361
Slc2a13	1.01999	-0.613972	0.260329	-2.35845	0.0183515	0.10361
Hsd17b10	1.06025	-0.616212	0.261295	-2.3583	0.0183587	0.10361
Supt3	0.343462	-1.00585	0.42671	-2.35723	0.0184118	0.103848
Zbtb44	0.635721	0.757921	0.321586	2.35683	0.0184319	0.103901
Snap25	27.0548	-0.19728	0.083733	-2.35607	0.0184696	0.104052
Tmem203	0.44755	-0.83603	0.354894	-2.35572	0.018487	0.104089
Selenom	7.98301	-0.238823	0.101428	-2.35462	0.0185417	0.104296
Mrps34	2.39682	-0.406658	0.172712	-2.35454	0.0185457	0.104296
Rpl5	15.9415	0.22436	0.0953285	2.35355	0.0185951	0.104506
Gpd1	0.37705	-1.10787	0.470761	-2.35336	0.0186048	0.104506
Camta2	5.25838	-0.307094	0.130604	-2.35134	0.0187059	0.105012
Meg3	39.1387	-0.181971	0.0774023	-2.35098	0.018724	0.105052
Negr1	5.97683	-0.290643	0.123652	-2.35049	0.0187486	0.105063
Sptbn2	10.3209	0.227692	0.0968732	2.35042	0.0187525	0.105063
Mrpl34	3.78656	-0.347274	0.147775	-2.35002	0.0187724	0.105063
Ranbp3	1.7048	0.497773	0.211833	2.34984	0.0187816	0.105063
Nsmf	12.9452	-0.23198	0.0987295	-2.34965	0.0187909	0.105063
Ogdhl	0.328743	-1.01902	0.433693	-2.34964	0.0187918	0.105063
Tigar	0.309498	-1.0836	0.461229	-2.34939	0.0188044	0.105072
2900079G21Rik	0.953521	-0.644798	0.274513	-2.34888	0.01883	0.105154
Nln	1.47211	0.554489	0.236157	2.34797	0.0188762	0.105337
Zfp623	0.309171	-1.03739	0.441858	-2.34779	0.018885	0.105337
Mars2	0.550863	-0.789587	0.336484	-2.34658	0.0189466	0.105533
Cltb	6.7563	-0.289944	0.123571	-2.34637	0.0189575	0.105533
Blvra	0.658968	-0.75921	0.323631	-2.34591	0.0189806	0.105533
Gan	0.540533	-0.795632	0.339163	-2.34587	0.0189828	0.105533
Slc22a8	0.449448	-0.915408	0.390222	-2.34586	0.0189831	0.105533
Agap1	1.94722	-0.461513	0.196765	-2.3455	0.0190013	0.105533
Surf2	1.21442	-0.595209	0.253778	-2.34539	0.0190072	0.105533
Mif	23.8454	-0.17865	0.0761763	-2.34522	0.0190158	0.105533
Mthfs	0.545519	-0.782669	0.333739	-2.34515	0.0190194	0.105533
Tpra1	0.505617	-0.818052	0.348864	-2.3449	0.0190321	0.105543
Lncppara	0.341238	-0.973873	0.415365	-2.34462	0.0190464	0.105561
1810058I24Rik	2.61536	-0.387547	0.165316	-2.34428	0.019064	0.105597
Pdia6	4.19764	-0.350414	0.149684	-2.34102	0.0192309	0.10646
Ypel1	1.38457	0.58173	0.248625	2.33979	0.0192945	0.10675
Terf2ip	0.980613	0.624215	0.266858	2.33913	0.0193289	0.106879
Srsf10	1.94081	-0.472337	0.201961	-2.33875	0.0193482	0.106924
Mcf2l	3.49215	-0.346133	0.14806	-2.3378	0.0193979	0.107136
Dock4	0.630613	0.732594	0.313703	2.33531	0.0195273	0.107736
Pa2g4	1.64259	-0.478002	0.204687	-2.33528	0.0195289	0.107736
Rasgef1b	0.861971	-0.703634	0.301387	-2.33465	0.0195617	0.107834
Tomm20	8.23352	-0.256386	0.109825	-2.3345	0.0195693	0.107834
1500011B03Rik	10.7022	-0.222852	0.0954734	-2.33418	0.0195864	0.107866
Ubxn1	3.46249	-0.348705	0.149415	-2.3338	0.0196061	0.107912
Mrpl38	1.31047	-0.538894	0.231086	-2.33201	0.0197003	0.108369
Ccdc130	0.399367	-0.855824	0.367049	-2.33163	0.01972	0.108415
Mfsd1	0.869608	-0.707719	0.303637	-2.33081	0.0197636	0.108592
Tle3	1.49242	-0.509264	0.218558	-2.33011	0.0198003	0.108731
Rnf157	2.47654	0.421543	0.180952	2.32959	0.0198279	0.108786
Slc25a1	1.74585	0.498036	0.213796	2.32949	0.019833	0.108786
Zik1	0.350517	-0.891639	0.38295	-2.32835	0.0198937	0.109028
Phactr1	3.71802	-0.339367	0.145764	-2.3282	0.0199016	0.109028
Pou3f3	3.93439	-0.349527	0.150139	-2.32801	0.0199114	0.109028
Acss2	0.948556	-0.634035	0.272411	-2.32749	0.0199391	0.109117
Snrpb	4.67776	-0.292621	0.125759	-2.32684	0.019974	0.109246
Reep3	0.810001	-0.651286	0.280188	-2.32447	0.0201005	0.109875
Slc35f6	0.759792	-0.703949	0.302902	-2.32402	0.0201245	0.109943
Gramd4	0.933404	-0.653682	0.281341	-2.32345	0.0201551	0.110022
Setd3	3.15065	-0.387968	0.166998	-2.32318	0.0201693	0.110022
6430548M08Rik	1.21988	-0.55056	0.236993	-2.32311	0.0201734	0.110022
Gm16638	0.419838	-0.856411	0.368717	-2.32268	0.0201962	0.110036
Crh	0.3196	-1.53161	0.659429	-2.32263	0.0201989	0.110036
D8Ertd738e	6.05981	-0.26604	0.114573	-2.322	0.0202328	0.110157
Dock5	0.469684	-0.828333	0.356864	-2.32115	0.0202789	0.110309
Dusp3	2.21651	-0.421936	0.181786	-2.32106	0.0202836	0.110309
Ubtd1	0.399525	-0.934986	0.403128	-2.31933	0.0203773	0.110755
BC003965	1.90738	-0.453981	0.195774	-2.3189	0.0204002	0.11078
Atat1	3.13872	0.402019	0.173373	2.31881	0.0204051	0.11078
Aurkaip1	3.15233	-0.380109	0.163975	-2.31809	0.0204442	0.110909
Rapgef1	3.20845	-0.368342	0.158908	-2.31795	0.0204519	0.110909
Pdp1	1.34978	0.590586	0.25491	2.31684	0.0205124	0.111174
Prkab1	0.781323	-0.692616	0.299073	-2.31587	0.0205653	0.111397
Parl	1.19937	-0.56178	0.242651	-2.31518	0.0206033	0.11154
Fcrls	0.440126	-0.853818	0.368844	-2.31485	0.0206214	0.111575
Adam17	0.368519	-0.90103	0.38945	-2.31359	0.02069	0.111883
Tdrd3	0.921765	-0.643032	0.277997	-2.31309	0.0207175	0.111968
Sipa1l3	0.600631	-0.761539	0.329487	-2.31129	0.020817	0.112442
Zfp821	1.70814	-0.477906	0.206816	-2.31077	0.0208454	0.11253
Polr3h	2.44992	-0.421647	0.182486	-2.31057	0.0208568	0.11253
Spns2	0.504476	-0.820808	0.355312	-2.3101	0.0208825	0.112556
Trappc10	1.15108	-0.578789	0.250571	-2.30988	0.0208949	0.112556
Cend1	7.99645	-0.255634	0.110682	-2.30963	0.0209084	0.112556
Cops7a	3.17228	-0.345232	0.149475	-2.30963	0.0209086	0.112556
Timm44	2.19569	-0.418313	0.181173	-2.30891	0.0209484	0.112707
Tmtc4	1.25591	0.581136	0.251719	2.30866	0.0209622	0.112718
Coq8b	0.471405	-0.808283	0.350373	-2.30692	0.0210592	0.113176
Parp1	1.80597	-0.457135	0.198306	-2.3052	0.0211555	0.113629
1110012L19Rik	0.756417	-0.700049	0.303924	-2.30337	0.0212582	0.114068
Lmbrd1	2.80202	-0.369872	0.1606	-2.30306	0.0212755	0.114068
Inpp5d	0.32861	-1.00394	0.43592	-2.30303	0.0212771	0.114068
Stoml2	3.1351	-0.369807	0.16059	-2.3028	0.0212899	0.114068
Snrpb2	2.34392	-0.41844	0.181718	-2.30268	0.0212968	0.114068
Tbce	1.36083	-0.531165	0.230806	-2.30135	0.021372	0.114407
Tmem161a	0.963598	-0.649708	0.282405	-2.30062	0.0214131	0.114516
Brinp3	0.893018	0.708647	0.308032	2.30056	0.0214164	0.114516
Ppp2r3a	0.451497	-0.803453	0.34935	-2.29985	0.0214566	0.114664
Fam169a	1.40552	0.537093	0.233574	2.29946	0.0214789	0.114664
Rhobtb2	1.24432	-0.531002	0.230927	-2.29944	0.0214801	0.114664
Sdhc	2.70795	-0.367409	0.159826	-2.2988	0.0215161	0.114774
A730063M14Rik	0.445801	-0.816515	0.355215	-2.29865	0.0215246	0.114774
Ndufb7	5.48885	-0.286174	0.124522	-2.29818	0.0215515	0.114791
Mtrex	1.73723	-0.471941	0.20536	-2.29811	0.0215553	0.114791
Gmip	0.351631	-0.882631	0.384103	-2.29791	0.0215672	0.114791
Dhrs7b	1.12816	-0.584679	0.254501	-2.29736	0.0215985	0.114791
Cebpb	0.430449	-0.826283	0.359677	-2.29729	0.0216021	0.114791
2310022B05Rik	1.12409	-0.573179	0.249504	-2.29727	0.0216034	0.114791
Bag6	4.37348	-0.326263	0.142038	-2.29701	0.021618	0.114791
Adgrb3	3.88535	0.338184	0.147234	2.29691	0.0216237	0.114791
Gid8	1.15906	-0.560141	0.243963	-2.29601	0.0216752	0.114991
Arhgef7	3.56817	-0.333119	0.145106	-2.2957	0.0216932	0.114991
Rpl14	19.5755	0.198447	0.0864459	2.29562	0.0216975	0.114991
Myg1	0.546495	-0.770678	0.335976	-2.29385	0.0217991	0.115465
Map2k5	1.33564	-0.546691	0.238372	-2.29344	0.0218228	0.115471
Ppp3ca	14.1928	0.199207	0.0868606	2.29341	0.0218243	0.115471
Arglu1	2.66528	-0.373673	0.163094	-2.29115	0.021955	0.116038
Mcee	1.25885	-0.546625	0.238603	-2.29094	0.0219666	0.116038
Smarcd1	3.64233	-0.335467	0.146433	-2.29092	0.021968	0.116038
Mpv17	1.49746	-0.501306	0.218911	-2.29	0.0220215	0.116257
Psmb1	9.39346	-0.240302	0.104947	-2.28974	0.0220361	0.11627
Gon4l	1.32125	-0.5472	0.239101	-2.28858	0.0221039	0.116564
Rtn1	78.6879	0.149795	0.0654821	2.28757	0.0221627	0.116799
Tpd52l2	2.57589	-0.378118	0.165306	-2.28739	0.022173	0.116799
Arf3	13.8322	0.197927	0.0865575	2.28666	0.0222158	0.11696
Idh2	1.04001	-0.598851	0.261944	-2.28618	0.0222437	0.117042
Rian	10.9485	-0.245188	0.107277	-2.28555	0.0222809	0.117113
Sh3yl1	0.634022	0.731862	0.320234	2.2854	0.0222896	0.117113
Mrpl22	1.31533	-0.553524	0.242208	-2.28532	0.0222939	0.117113
Aars	3.56851	-0.347088	0.151909	-2.28484	0.0223222	0.117196
Cds2	2.59191	0.396351	0.173485	2.28464	0.0223341	0.117196
Gm20878	0.35857	-0.849224	0.371764	-2.28431	0.0223535	0.117234
Junb	0.705922	-0.722421	0.316494	-2.28257	0.0224556	0.117704
Ncor2	1.74809	-0.448363	0.19646	-2.28221	0.0224768	0.117751
Slc39a3	1.66016	0.494291	0.216709	2.2809	0.0225542	0.118092
Atf6	0.337511	-0.897062	0.393351	-2.28057	0.0225742	0.118132
Gpr17	0.885739	-0.646947	0.283839	-2.27928	0.0226505	0.118414
2310061I04Rik	2.16544	-0.433359	0.190155	-2.27897	0.0226687	0.118414
Sdhd	4.34502	-0.313017	0.137351	-2.27895	0.0226702	0.118414
Hdac4	1.87687	-0.445327	0.195432	-2.27868	0.0226862	0.118414
Lrrfip2	0.749109	-0.699413	0.306947	-2.27861	0.02269	0.118414
Emc2	2.80242	-0.358527	0.15739	-2.27795	0.0227297	0.118556
Rpp25	0.47519	-0.807211	0.3545	-2.27704	0.022784	0.118775
Dgcr2	3.18499	-0.342897	0.150611	-2.27671	0.0228034	0.118801
Gcsh	2.35186	-0.401763	0.17648	-2.27654	0.0228139	0.118801
Ccdc12	1.74503	-0.467536	0.205462	-2.27553	0.0228739	0.119049
Gnai1	2.57221	0.413061	0.181601	2.27455	0.0229331	0.119272
Ltv1	0.616476	-0.740798	0.325711	-2.2744	0.0229417	0.119272
Cnr1	1.71849	0.567865	0.249756	2.27368	0.022985	0.119377
Slitrk5	1.95539	0.467171	0.205472	2.27365	0.0229869	0.119377
Ophn1	0.548757	-0.752909	0.33119	-2.27334	0.0230054	0.119404
Cry1	0.735592	-0.702869	0.309205	-2.27315	0.0230171	0.119404
Thoc7	4.85593	-0.292779	0.128814	-2.27288	0.0230337	0.119426
Nasp	2.77308	-0.376651	0.165758	-2.27229	0.0230692	0.119545
Cyp2u1	0.336709	-0.895331	0.394229	-2.2711	0.0231412	0.119853
Lmtk3	2.54386	-0.388083	0.170909	-2.27069	0.0231655	0.119903
1500035N22Rik	1.92204	-0.432981	0.190697	-2.27052	0.0231759	0.119903
Matr3	9.028	0.230124	0.101366	2.27022	0.0231944	0.119934
Porcn	1.68014	-0.479683	0.211367	-2.26943	0.0232425	0.120117
Mrpl48	2.18142	-0.440411	0.194126	-2.26868	0.0232875	0.120285
Ptbp1	0.886463	-0.63465	0.279836	-2.26794	0.023333	0.120455
H2afv	1.92654	-0.453347	0.199948	-2.26733	0.0233702	0.120582
Sdcbp	2.67038	-0.437203	0.192903	-2.26644	0.0234246	0.120798
Trappc13	1.47282	-0.499981	0.220734	-2.26508	0.0235075	0.121117
Cd302	0.553031	-0.753099	0.332492	-2.26501	0.0235119	0.121117
Ndufaf8	1.91782	-0.434848	0.192046	-2.26429	0.0235562	0.121223
Samd4b	0.945856	-0.608742	0.268852	-2.26422	0.0235603	0.121223
Ercc6l2	0.28621	-1.04565	0.461849	-2.26406	0.0235704	0.121223
Nog	0.332405	-1.02275	0.451831	-2.26357	0.0236008	0.121314
Dtx3	4.17549	-0.315493	0.139415	-2.26299	0.0236365	0.121371
Plxna2	1.61465	-0.464726	0.205361	-2.26297	0.0236373	0.121371
Rgs2	1.78377	-0.478431	0.211532	-2.26174	0.0237134	0.121696
Astn1	4.15118	0.340992	0.150786	2.26144	0.023732	0.121717
Alkbh2	0.350267	-0.944295	0.417596	-2.26127	0.0237428	0.121717
Rab21	2.09812	-0.414091	0.183144	-2.26101	0.0237585	0.121732
Katnal1	0.970797	0.619044	0.273981	2.25944	0.0238558	0.122165
Tmx4	1.85176	0.460205	0.203802	2.2581	0.0239395	0.122528
Elp6	0.799404	-0.675597	0.299234	-2.25775	0.023961	0.122554
Ppil1	1.23203	-0.542062	0.240113	-2.25753	0.0239748	0.122554
Ercc2	1.01052	-0.608332	0.269496	-2.2573	0.0239895	0.122554
Armh4	0.873536	-0.648566	0.287332	-2.2572	0.0239957	0.122554
Sec24d	0.308791	-1.07673	0.47714	-2.25663	0.0240312	0.122669
Timm21	0.555981	-0.820971	0.363925	-2.25588	0.0240783	0.122822
Lhx2	3.26077	0.354272	0.157053	2.25574	0.0240867	0.122822
Cluap1	0.961718	-0.602553	0.267167	-2.25534	0.024112	0.122826
Sap18	2.36678	-0.39281	0.174171	-2.25532	0.0241132	0.122826
Tor1a	1.62243	-0.462681	0.205182	-2.25497	0.024135	0.122871
Ppt1	1.6344	-0.468456	0.207789	-2.25448	0.024166	0.122952
Eif3k	4.58585	-0.303854	0.134788	-2.25431	0.0241765	0.122952
Cbr1	2.79983	-0.360325	0.159867	-2.25391	0.0242018	0.122956
Kctd5	1.3774	-0.503189	0.223261	-2.25381	0.024208	0.122956
Pbx1	1.57816	0.499851	0.221793	2.25369	0.0242158	0.122956
Kctd6	1.06645	-0.58537	0.259863	-2.25261	0.0242839	0.123236
Exosc4	1.31443	-0.527898	0.234461	-2.25154	0.0243512	0.123512
Pop7	2.20085	-0.41056	0.182421	-2.25062	0.0244096	0.123742
Atf7	0.364762	-0.868217	0.385831	-2.25025	0.0244328	0.123795
Tbc1d9b	1.36805	-0.502628	0.223419	-2.24971	0.0244675	0.123905
Cfap36	2.70987	-0.376568	0.167409	-2.24939	0.024488	0.123943
Map4k4	2.44366	-0.392859	0.174686	-2.24894	0.0245163	0.12402
Rpsa	32.9307	0.158021	0.0703248	2.24702	0.0246388	0.124574
Limch1	1.55973	-0.485631	0.216176	-2.24646	0.0246745	0.124689
Mettl16	0.451191	-0.781332	0.34827	-2.24347	0.0248668	0.125595
Unc80	1.13523	-0.555157	0.247566	-2.24246	0.0249317	0.125796
Ctc1	1.15057	0.567579	0.253125	2.24229	0.0249429	0.125796
Ppib	5.4724	-0.273191	0.121839	-2.24224	0.0249461	0.125796
Lamp5	0.853586	-0.632633	0.282197	-2.24181	0.0249736	0.125868
Arsb	1.71698	-0.471568	0.210393	-2.24137	0.0250022	0.125946
Gabra3	1.08296	0.611876	0.273198	2.23968	0.0251119	0.126319
Crtc3	0.4049	-0.811622	0.362389	-2.23964	0.0251142	0.126319
Rpl28	22.8961	-0.172025	0.0768115	-2.23958	0.0251185	0.126319
Pgm2	0.38276	-0.848767	0.379013	-2.23941	0.025129	0.126319
Gtf2h2	0.45482	-0.783207	0.349859	-2.23864	0.0251796	0.126506
Slc19a1	0.638439	-0.708879	0.31683	-2.23741	0.0252594	0.126841
Ucp2	0.323477	-0.998663	0.446478	-2.23676	0.0253021	0.126926
Ank	3.90565	-0.309624	0.138426	-2.23675	0.025303	0.126926
Sh2b3	0.540179	-0.746294	0.333722	-2.23627	0.0253338	0.127014
Jmjd8	0.556005	-0.750848	0.335869	-2.23554	0.025382	0.127189
Kdm5b	0.840448	-0.640737	0.28667	-2.2351	0.0254106	0.127249
Brpf3	0.743296	-0.704806	0.315356	-2.23495	0.0254205	0.127249
Vwa1	0.535547	-0.74179	0.3321	-2.23364	0.0255071	0.127563
Klf6	1.80707	0.479028	0.214465	2.23359	0.0255099	0.127563
Sirt7	1.11323	-0.5641	0.252621	-2.23299	0.0255498	0.127691
Clcc1	0.469151	-0.804404	0.360316	-2.2325	0.0255822	0.127691
Prxl2b	1.51339	-0.486031	0.217716	-2.23241	0.0255881	0.127691
Mrtfa	0.66871	-0.716543	0.321018	-2.23209	0.0256088	0.127691
Vps4b	1.46109	-0.50295	0.225336	-2.232	0.025615	0.127691
Ap2a2	6.39209	-0.293132	0.131337	-2.2319	0.0256212	0.127691
Dagla	1.63787	-0.468462	0.209904	-2.23179	0.025629	0.127691
Supt6	2.22716	-0.41947	0.188004	-2.23117	0.0256695	0.127827
Diaph1	0.661137	-0.706522	0.316876	-2.22965	0.0257708	0.128264
Gm7072	0.453877	-0.806737	0.361856	-2.22944	0.0257847	0.128266
Ube2e1	5.07952	-0.299129	0.134236	-2.22838	0.0258549	0.128515
Tmem251	0.619335	-0.744327	0.334057	-2.22815	0.0258707	0.128515
Cic	4.28473	-0.336252	0.150915	-2.22808	0.0258749	0.128515
Dtymk	2.67866	-0.368602	0.165495	-2.22727	0.0259292	0.12865
Mpnd	2.02738	-0.421125	0.189078	-2.22726	0.0259299	0.12865
Fbxo22	1.53983	-0.472215	0.212034	-2.22707	0.0259425	0.12865
5430416N02Rik	1.7577	-0.455017	0.204386	-2.22626	0.0259965	0.128796
Cdo1	1.46126	0.539498	0.242337	2.22623	0.0259989	0.128796
Nek6	1.52296	-0.490498	0.220462	-2.22486	0.0260905	0.129183
Pprc1	0.747318	-0.672438	0.302317	-2.22428	0.0261295	0.129259
Ephb3	1.1608	-0.564821	0.25394	-2.22423	0.0261328	0.129259
Adrm1	1.88713	-0.433217	0.194852	-2.22331	0.0261948	0.129498
Zdhhc18	1.16845	-0.554322	0.249358	-2.22299	0.0262162	0.129537
Slc13a5	0.371291	-0.823392	0.370714	-2.2211	0.0263444	0.130104
Ddx42	1.57519	-0.462817	0.208555	-2.21916	0.026476	0.130595
Ptpn4	0.85341	-0.641248	0.288976	-2.21904	0.0264843	0.130595
Sec13	2.01677	-0.419182	0.188904	-2.21902	0.0264854	0.130595
Sumo3	3.56414	-0.351303	0.158329	-2.21883	0.0264986	0.130595
Anapc10	0.706577	-0.690737	0.31166	-2.21631	0.02667	0.131372
Poglut1	1.47177	-0.523163	0.236075	-2.21609	0.0266855	0.131381
B3galt1	1.61938	-0.466462	0.210564	-2.21529	0.02674	0.131582
Dynlt1f	0.324741	-0.904388	0.40837	-2.21463	0.0267855	0.131717
Aatk	3.47142	-0.347558	0.156947	-2.21449	0.026795	0.131717
Slc6a17	3.40221	-0.326865	0.147722	-2.21271	0.0269178	0.132135
Atp13a2	4.98959	-0.283273	0.128032	-2.21252	0.0269305	0.132135
Snapc4	1.11725	-0.571616	0.25836	-2.21248	0.0269336	0.132135
Mrps6	3.1748	-0.335535	0.151658	-2.21245	0.0269354	0.132135
Actr1b	5.93124	-0.258989	0.117118	-2.21136	0.0270112	0.132439
Dlst	3.06977	-0.34373	0.155575	-2.20941	0.0271463	0.133033
Maz	2.43039	-0.376488	0.170438	-2.20894	0.0271785	0.133123
Crym	1.32329	0.56205	0.254542	2.20808	0.0272387	0.13331
Adora1	2.37555	-0.387307	0.175411	-2.208	0.0272446	0.13331
Mchr1	0.29304	-1.0433	0.472618	-2.20749	0.0272796	0.13337
Ryk	0.940317	-0.589213	0.266924	-2.20742	0.0272847	0.13337
Stard10	0.578649	-0.715334	0.324137	-2.20689	0.0273219	0.133484
Cdc123	2.14735	0.416435	0.188783	2.20589	0.0273915	0.133755
Glcci1	1.38199	-0.504657	0.228893	-2.20478	0.0274698	0.134069
Smad2	1.25772	-0.518046	0.235047	-2.20401	0.0275239	0.134207
Plekhb1	0.579813	-0.730557	0.331472	-2.20398	0.027526	0.134207
Tbrg4	0.460755	-0.787606	0.357434	-2.2035	0.0275594	0.134301
Txndc15	2.44141	-0.397439	0.180446	-2.20253	0.0276278	0.134566
Lrfn2	0.34514	-0.895847	0.406776	-2.20231	0.0276433	0.134573
9130024F11Rik	2.36044	-0.397317	0.180614	-2.19981	0.0278206	0.135367
Chst1	3.84448	0.320123	0.145552	2.19938	0.0278512	0.13541
Ptprn	6.37587	-0.271605	0.123497	-2.19928	0.0278577	0.13541
Snhg8	3.27607	0.346892	0.157761	2.19885	0.0278887	0.135455
Hps4	0.511198	-0.759705	0.345519	-2.19874	0.0278965	0.135455
Ndufv2	8.49155	-0.226059	0.102821	-2.19856	0.0279094	0.135455
Mapkapk5	0.343688	-0.927792	0.422049	-2.1983	0.0279274	0.135473
Mcm5	0.291488	-0.924084	0.420586	-2.19713	0.0280109	0.1358
Psmd2	5.73643	-0.270265	0.123017	-2.19696	0.0280231	0.1358
Pacsin1	2.30065	-0.387902	0.176598	-2.19652	0.0280547	0.135884
Brix1	1.32185	-0.512014	0.233151	-2.19606	0.0280879	0.135947
Nme1	19.5765	-0.176387	0.0803241	-2.19594	0.0280961	0.135947
Nmt2	1.85627	-0.420969	0.191796	-2.19488	0.028172	0.136245
Dbx2	0.49034	-0.793368	0.36152	-2.19453	0.0281972	0.136285
Fuca1	1.03629	-0.579935	0.264283	-2.19437	0.0282086	0.136285
Mbnl2	1.86571	-0.423975	0.193352	-2.19277	0.0283243	0.136774
Eaf1	0.360033	-0.833513	0.380178	-2.19243	0.0283487	0.136823
Shisa7	1.44879	-0.495268	0.225968	-2.19176	0.028397	0.136987
Ppp1r37	1.49275	-0.477655	0.218007	-2.191	0.0284515	0.137078
Pde4a	1.32336	-0.505131	0.23058	-2.1907	0.0284734	0.137078
Tex264	3.26404	-0.34565	0.15779	-2.19057	0.0284826	0.137078
Sumo1	6.00979	-0.260966	0.119132	-2.19056	0.0284836	0.137078
Elovl5	1.58448	-0.479238	0.21878	-2.19051	0.0284874	0.137078
Stimate	0.691772	-0.669183	0.305773	-2.1885	0.0286333	0.137711
Coro1a	4.56889	-0.305881	0.139802	-2.18795	0.028673	0.137832
Rras	0.289398	-0.945493	0.432178	-2.18774	0.0286885	0.137837
Stx17	0.624931	-0.692987	0.316811	-2.18738	0.0287146	0.137894
Fam234b	2.29164	-0.4111	0.188022	-2.18645	0.028783	0.138153
Hebp1	0.918877	-0.62395	0.285462	-2.18576	0.0288335	0.13829
Ugp2	1.81091	0.460864	0.210858	2.18566	0.0288406	0.13829
Mfn1	1.91754	-0.427369	0.19561	-2.1848	0.0289036	0.138523
Dnlz	5.27301	-0.318745	0.145911	-2.18452	0.028924	0.138551
Zfc3h1	0.881007	-0.629354	0.288178	-2.18391	0.0289691	0.138698
Acot8	0.728982	-0.674768	0.309005	-2.18368	0.0289857	0.138708
[truncated: 7,567 more rows]

## Sheet: 2.Visium_L4_septa_vs_hollow_DEG
Gene	baseMean	log2FoldChange	lfcSE	stat	pvalue	padj	Pattern	Clustering gene
gap43	617.302	0.190291	0.0118924	16.001	1.25734e-57	1.39075e-53	Septa	YES
lypd1	26.9621	0.837981	0.0549904	15.2387	1.95787e-52	1.0828e-48	Septa	YES
cd24a	242.33	0.263664	0.0188838	13.9625	2.64103e-44	9.73749e-41	Septa	YES
sepw1	1452.22	0.0887207	0.00782518	11.3378	8.52177e-30	2.35648e-26
ptn	703.313	-0.112419	0.0114774	-9.79478	1.18557e-22	2.62271e-19
crip2	179.101	0.203591	0.022053	9.23188	2.65912e-20	4.9021e-17
s100a10	77.9019	0.300007	0.0332223	9.03031	1.71188e-19	2.70501e-16
lmo4	101.326	0.255421	0.0291494	8.76247	1.91025e-18	2.64116e-15
map1b	395.083	0.123824	0.0149375	8.28951	1.1372e-16	1.39762e-13	Septa
tppp3	21.1411	0.507324	0.0626721	8.0949	5.73124e-16	6.33933e-13	Septa	YES
tmsb10	984.308	0.0748986	0.00952266	7.8653	3.68208e-15	3.7025e-12
pgm2l1	124.405	0.203957	0.0264381	7.71448	1.21476e-14	1.1197e-11
tubb5	729.628	0.0843248	0.0110504	7.63091	2.33097e-14	1.9833e-11
neurod6	45.2714	0.310132	0.0434172	7.14306	9.12762e-13	7.21147e-10
tenm1	27.602	0.387548	0.0550796	7.03614	1.97639e-12	1.45739e-09	Septa	YES
nrxn3	56.9106	0.268517	0.0388291	6.91537	4.66652e-12	3.22602e-09
cux2	46.4348	-0.315695	0.0458761	-6.88146	5.92411e-12	3.64037e-09
tcf4	344.419	-0.112999	0.0164181	-6.88258	5.87777e-12	3.64037e-09
flrt3	11.6306	0.573315	0.0838495	6.83743	8.0627e-12	4.69377e-09
stmn2	1070.86	0.0623836	0.00913602	6.82831	8.59206e-12	4.75184e-09
a830029e22rik	13.7789	0.524461	0.0776352	6.75545	1.42392e-11	7.50002e-09
met	9.70893	0.598202	0.0918443	6.51322	7.35583e-11	3.69831e-08	Septa	YES
tubb2b	429.909	0.0921427	0.0143831	6.40633	1.49061e-10	7.16853e-08	Septa
fxyd6	163.584	0.14776	0.0232106	6.36607	1.93934e-10	8.93793e-08
tuba1a	1459.45	0.0498084	0.00783999	6.35311	2.11e-10	9.33548e-08
cpne4	11.1628	0.535544	0.0860991	6.22008	4.96895e-10	2.11391e-07
chchd10	98.1309	-0.192575	0.0311766	-6.1769	6.53743e-10	2.67817e-07
ncam1	282.774	0.108788	0.0176693	6.1569	7.41826e-10	2.93048e-07
cdkn1a	16.0813	0.437497	0.0721799	6.0612	1.3511e-09	5.15327e-07
dpysl3	155.105	0.14339	0.0238104	6.02216	1.72105e-09	6.34552e-07	Septa
cux1	73.3961	-0.216059	0.0359677	-6.00703	1.88947e-09	6.74175e-07
sncb	375.385	-0.0938833	0.0156881	-5.98438	2.17215e-09	7.50816e-07
gabra5	30.2243	0.314738	0.0529525	5.94377	2.78545e-09	9.33633e-07
serf1	164.349	0.13553	0.023154	5.85341	4.81587e-09	1.56671e-06
basp1	268.56	0.106013	0.0181557	5.8391	5.24832e-09	1.65862e-06
rp23-407n2.2	46.9769	0.24822	0.042836	5.79465	6.8464e-09	2.10356e-06
h3f3b	650.03	-0.068737	0.0118951	-5.77859	7.53274e-09	2.25188e-06
lmo1	5.86027	0.670498	0.117446	5.709	1.13644e-08	3.30794e-06
dpysl2	291.097	0.0989419	0.0174401	5.67323	1.4013e-08	3.97429e-06
sema7a	33.4546	-0.305124	0.0540683	-5.64331	1.66807e-08	4.61264e-06	Hollow	YES
rac3	218.396	0.110238	0.0201437	5.47259	4.435e-08	1.19648e-05	Septa
h2afz	251.483	0.101344	0.0188021	5.39001	7.04527e-08	1.81227e-05
runx1t1	37.8355	0.257482	0.047761	5.39105	7.00482e-08	1.81227e-05
map1lc3a	458.097	0.074534	0.0139514	5.3424	9.17216e-08	2.25452e-05
hs3st2	16.8792	0.377345	0.0706254	5.34291	9.14677e-08	2.25452e-05
ftl1	953.773	0.0514096	0.00969685	5.30169	1.14738e-07	2.75896e-05
pdcd4	11.8923	0.440267	0.0834818	5.2738	1.33624e-07	3.14472e-05
gabra1	41.1018	-0.254805	0.0483686	-5.26798	1.37935e-07	3.17853e-05
scg2	13.7755	0.408971	0.0782863	5.22404	1.75064e-07	3.93565e-05
arhgdig	222.215	0.104284	0.0199738	5.22105	1.77907e-07	3.93565e-05
brinp3	11.0392	0.449796	0.0869189	5.17489	2.28048e-07	4.94597e-05
pcdh19	19.0402	0.340942	0.0666034	5.11898	3.07185e-07	6.53419e-05	Septa	YES
rgs4	24.1303	0.303577	0.0593623	5.11398	3.15443e-07	6.58324e-05	Septa	YES
afap1	29.5311	-0.293839	0.0576134	-5.10018	3.39332e-07	6.95065e-05
pkia	81.0386	0.164542	0.032836	5.01102	5.41415e-07	0.000108884	Septa	YES
tubb3	223.113	0.0995386	0.0199552	4.98809	6.09778e-07	0.000120442	Septa
ndufa5	165.038	-0.11562	0.0237037	-4.87773	1.07315e-06	0.000208248
tsc22d1	224.319	-0.0986887	0.0203104	-4.85903	1.17964e-06	0.000224966
sh3bgrl3	225.914	0.0960438	0.0198534	4.83764	1.31391e-06	0.000246326
tuba1b	160.742	0.113458	0.0234703	4.83409	1.33754e-06	0.000246576
b3glct	16.7324	0.341032	0.0711154	4.79547	1.62295e-06	0.000294286
chgb	83.565	-0.159715	0.0335037	-4.76708	1.86918e-06	0.000333468
snhg11	684.346	-0.0550699	0.0115625	-4.76278	1.90941e-06	0.000335237
mllt11	823.109	0.0484429	0.0104384	4.64085	3.46983e-06	0.000599684
deaf1	96.0782	0.139644	0.0302386	4.61807	3.8733e-06	0.000659117
1700097n02rik	3.39789	0.797633	0.17417	4.57963	4.65795e-06	0.000780629
scn9a	8.71232	0.446497	0.0981055	4.55119	5.33434e-06	0.000880644
6330403k07rik	183.254	0.0998	0.0219994	4.5365	5.71968e-06	0.000930373
brinp1	82.2026	-0.151931	0.0337819	-4.49741	6.87871e-06	0.00110269	Hollow
ovol2	2.55451	0.917353	0.20598	4.45361	8.44386e-06	0.00133425
nrep	304.808	-0.0765452	0.0173856	-4.40279	1.0687e-05	0.00166491
dynll1	503.636	0.058239	0.0133275	4.36984	1.24336e-05	0.00188395
cdh13	16.8863	0.310745	0.0710907	4.37111	1.23618e-05	0.00188395
foxp1	207	0.0901152	0.0206985	4.35371	1.33852e-05	0.00200073
tmsb4x	2142.7	0.0900319	0.020737	4.34162	1.41438e-05	0.00208593
fezf2	11.0482	0.379074	0.0875117	4.33169	1.47968e-05	0.00215352
marcksl1	873.774	0.0436686	0.0101327	4.30969	1.63485e-05	0.00231834
spock1	51.8032	0.17652	0.0409486	4.31076	1.62697e-05	0.00231834	Septa
ppp3ca	225.781	0.0850763	0.0198338	4.28947	1.79101e-05	0.00248077
ankrd12	138.704	-0.111009	0.0258818	-4.28907	1.79425e-05	0.00248077
fnbp1l	76.5001	0.142913	0.0338663	4.21993	2.44377e-05	0.00329641
cadps2	29.4322	-0.241053	0.0570985	-4.22171	2.42454e-05	0.00329641	Hollow
hsbp1	288.204	0.0740096	0.0175728	4.2116	2.53568e-05	0.00337918
dner	48.4532	0.177033	0.042435	4.17186	3.02128e-05	0.00393157
a830009l08rik	50.4022	-0.180585	0.0432727	-4.17318	3.00376e-05	0.00393157
gpr22	38.9078	0.196772	0.047276	4.16219	3.15214e-05	0.00405416
rmst	1.58319	1.23079	0.2971	4.14267	3.43284e-05	0.00436444
btbd3	7.96311	-0.467076	0.112945	-4.13541	3.54316e-05	0.00445351	Hollow	YES
ackr1	26.7383	0.234704	0.0568281	4.13008	3.62635e-05	0.00450686
rprml	57.4933	0.161142	0.0390918	4.12213	3.75377e-05	0.00461339
mdga1	12.7097	-0.543375	0.132781	-4.09228	4.2715e-05	0.00519198
rab5a	41.0345	0.187675	0.0459575	4.08366	4.43318e-05	0.00532994
pcdh17	15.8578	0.299316	0.0735413	4.07004	4.70058e-05	0.00559066
actg1	573.944	0.0508075	0.0124973	4.06549	4.79317e-05	0.00564014
gnai1	29.8404	0.217249	0.0538595	4.03362	5.49248e-05	0.00639498
gng4	22.3293	0.250873	0.0622813	4.02807	5.62376e-05	0.00647963
fam163b	51.4157	-0.171842	0.0429215	-4.00364	6.23752e-05	0.00704013
epha7	12.1125	0.334837	0.0835877	4.00582	6.18034e-05	0.00704013
car7	4.12793	-0.642298	0.161359	-3.98056	6.87519e-05	0.00768147
lin7b	54.5922	0.158626	0.0400195	3.96371	7.37931e-05	0.00816225
kctd4	16.1077	-0.308974	0.0781825	-3.95196	7.7513e-05	0.00848883
rprm	55.8567	0.156451	0.0397186	3.93898	8.18284e-05	0.00879025
st6galnac3	6.41041	-0.50414	0.12799	-3.9389	8.18547e-05	0.00879025
atp1a2	26.0104	-0.238358	0.0605957	-3.93358	8.36892e-05	0.00881606
cadm3	44.2352	0.174756	0.0444211	3.93408	8.35172e-05	0.00881606
ank3	107.262	-0.115601	0.0294115	-3.93048	8.47765e-05	0.00884635
celf4	194.05	0.0840912	0.0214156	3.92664	8.61404e-05	0.00890467
plxna4	37.3683	-0.197292	0.0503131	-3.92127	8.80818e-05	0.00902105
idh1	30.0533	0.210007	0.0537883	3.90432	9.44896e-05	0.00958853
stmn1	1578.22	0.0293414	0.00755219	3.88516	0.000102263	0.010283
ptprn2	15.6068	-0.305799	0.0789826	-3.87173	0.000108065	0.0107685
hmgcs1	95.0978	0.11803	0.0305146	3.86798	0.000109741	0.0108379
enc1	61.8171	0.145967	0.0377599	3.86567	0.000110785	0.0108442	Septa
tnfrsf19	14.1874	-0.320761	0.083337	-3.84897	0.000118615	0.0115088
psd3	38.8451	0.182078	0.0473407	3.84612	0.000120004	0.0115423
zeb2	109.532	-0.111838	0.0291072	-3.84228	0.000121895	0.0116231
aldoc	34.2895	-0.201518	0.0525994	-3.83118	0.000127531	0.0120566
elavl2	66.4956	0.139121	0.0363384	3.82849	0.000128933	0.0120859
thra	275.535	0.0687172	0.0180073	3.81608	0.000135591	0.0126031
cfl1	551.653	0.0484916	0.0127457	3.80454	0.000142065	0.0130949
efr3a	25.374	-0.23349	0.0615067	-3.79618	0.000146945	0.0134327
pcnx	11.6985	-0.348342	0.0920531	-3.78414	0.000154242	0.0139842
uchl1	123.149	0.101025	0.0268128	3.7678	0.000164691	0.0148102
tpm4	10.866	0.329122	0.0883681	3.72444	0.000195746	0.0174608
ywhag	154.905	0.0891382	0.0239755	3.71788	0.000200901	0.017714
cd47	88.5556	0.117534	0.0316227	3.71677	0.000201787	0.017714
pcdh11x	14.4728	0.284857	0.0769056	3.70398	0.000212241	0.018485
antxr1	4.26073	-0.58109	0.157083	-3.69925	0.000216235	0.0185409
mt1	45.8977	-0.167245	0.0451956	-3.70048	0.000215193	0.0185409
banp	70.9423	-0.13412	0.0363073	-3.69404	0.000220719	0.0187798
adcy1	129.608	-0.0982853	0.0267331	-3.67654	0.000236414	0.0199617
ccl27a	90.4245	0.114869	0.0312916	3.67093	0.000241666	0.0202505
dbp	17.176	-0.27474	0.0750331	-3.66158	0.000250664	0.0208466	Hollow	YES
pou3f2	50.8521	-0.157296	0.0430012	-3.65793	0.000254256	0.0209112
gabrb3	46.7993	0.157857	0.0431886	3.65507	0.000257113	0.0209112
ngb	8.23441	-0.404405	0.110632	-3.65541	0.000256771	0.0209112
ncald	55.7213	0.144919	0.0397063	3.64977	0.000262472	0.0211912	Septa	YES
nrgn	1179.73	0.0897602	0.0246281	3.64462	0.000267784	0.0214635
tpd52	21.9022	0.22889	0.0629281	3.63733	0.000275477	0.0217646
lpl	74.07	-0.128813	0.0354005	-3.63873	0.000273985	0.0217646
rala	92.5528	0.112399	0.0309258	3.63448	0.000278539	0.0218505
arl4a	79.4943	-0.123505	0.0342245	-3.60868	0.000307762	0.0239729	Hollow
nnat	119.449	0.0979643	0.0272509	3.5949	0.00032452	0.0249272
dpf1	16.6398	0.258219	0.0718052	3.59611	0.000323015	0.0249272
mast4	11.3809	0.310404	0.0866082	3.584	0.000338372	0.025812
sulf2	8.9409	0.346696	0.0975288	3.55481	0.000378252	0.0285149
ywhah	260.862	0.0657523	0.0184993	3.55432	0.000378961	0.0285149
fkbp1b	193.457	-0.0771874	0.0217571	-3.54768	0.000388636	0.0290453
kcnab1	5.10039	0.537313	0.151624	3.54372	0.000394531	0.0292879
rbm39	213.809	-0.0729789	0.0207552	-3.51618	0.000437802	0.0322836
klf7	138.206	0.0892788	0.0254042	3.51434	0.000440856	0.0322934
pantr1	216.35	-0.071946	0.020596	-3.49321	0.000477252	0.0347295
dbi	196.583	-0.171492	0.0491336	-3.49032	0.000482449	0.0348782
crmp1	209.607	0.0719306	0.0206195	3.48848	0.00048578	0.034891	Septa
slc17a7	35.8796	0.171647	0.0494241	3.47293	0.0005148	0.0367368
slc1a2	90.3929	-0.110836	0.0320136	-3.46217	0.000535843	0.0375124
gatm	25.8851	0.200798	0.057965	3.46412	0.00053197	0.0375124
rbfox1	77.5444	-0.120063	0.034665	-3.46351	0.000533175	0.0375124
scrn1	33.5451	0.176638	0.0510517	3.45998	0.000540214	0.0375805
cox8a	620.257	-0.041881	0.0121375	-3.45055	0.000559438	0.0386747
smad7	3.66801	0.51267	0.149127	3.43782	0.000586424	0.0402884	Septa
ndufb5	116.052	-0.0969786	0.0282319	-3.43507	0.000592407	0.0404482
cttnbp2	30.4531	-0.190645	0.0558142	-3.41571	0.00063615	0.0431684
igfbp4	11.2881	0.296209	0.086847	3.4107	0.000647958	0.0437016
tmeff2	6.99809	0.372355	0.109838	3.39006	0.000698785	0.0461217
csrp2	21.0623	0.217605	0.0642331	3.38775	0.00070469	0.0461217
1700001l19rik	17.1062	0.24089	0.0710806	3.38896	0.000701576	0.0461217
pde4d	15.3709	0.254229	0.0749797	3.39064	0.000697302	0.0461217
kcnip2	38.7427	-0.166597	0.0491334	-3.39071	0.00069713	0.0461217
nfix	143.183	-0.0858748	0.0253738	-3.38439	0.000713354	0.0464142
pfn2	231.089	0.0664118	0.0196596	3.37809	0.000729902	0.0468347
nkain2	7.6263	0.356906	0.10561	3.37947	0.000726261	0.0468347
arl2bp	57.7825	0.131996	0.0390854	3.37711	0.00073252	0.0468347
cacnb4	24.2363	0.200956	0.0596242	3.37038	0.000750639	0.0477173
slc35f4	32.4862	-0.180696	0.0540169	-3.34517	0.000822312	0.0519748
efnb3	28.0171	0.185808	0.0557216	3.33457	0.000854312	0.0536906	Septa	YES
gnao1	145.277	0.0823887	0.0247869	3.32388	0.000887733	0.0554758
akirin2	12.2477	0.275572	0.0835516	3.29822	0.000972996	0.0604624
per3	10.6316	-0.317878	0.0965012	-3.29403	0.000987622	0.0606894	Hollow	YES
a830036e02rik	36.2389	-0.167491	0.0508403	-3.29445	0.000986141	0.0606894
dusp26	72.4343	0.114787	0.0348763	3.29127	0.000997379	0.0609503
nwd2	46.7429	0.142511	0.0433562	3.28697	0.00101271	0.0615474
gm28050	5.93815	0.389395	0.118851	3.27633	0.00105167	0.0635658
cnih2	219.998	0.0659601	0.0201529	3.27298	0.0010642	0.0639733
tbca	178.146	0.073106	0.0223481	3.27123	0.0010708	0.0640082
cntn1	102.949	0.0959073	0.0293315	3.26977	0.00107635	0.0640082
rorb	149.669	-0.184798	0.0566009	-3.26494	0.00109488	0.0647621
ptprk	20.1382	0.213428	0.0654279	3.26204	0.00110615	0.0650805
erbb4	11.2414	-0.44164	0.135505	-3.25922	0.00111719	0.065382
calm2	1275.98	0.0273506	0.00839639	3.25742	0.00112429	0.0654513
lynx1	12.2753	-0.423627	0.130222	-3.25311	0.00114149	0.0661047
galt	28.8624	0.178623	0.0549622	3.24993	0.00115433	0.0665005
rpl12	228.251	0.0642083	0.019795	3.24367	0.00118002	0.0669341
nans	15.3272	-0.257001	0.079174	-3.24603	0.00117028	0.0669341
fam81a	24.9767	0.191908	0.0591564	3.24407	0.00117834	0.0669341
c530008m17rik	34.2049	0.163599	0.0504769	3.24107	0.00119084	0.0672035
gm3764	70.6916	-0.116921	0.0362153	-3.22851	0.00124436	0.0695144
fgf10	2.2867	0.627981	0.194461	3.22935	0.00124074	0.0695144
lrfn5	56.2693	0.126971	0.0394443	3.21901	0.00128635	0.0714993
dpysl5	60.7626	0.122112	0.0380622	3.20823	0.00133554	0.0737892	Septa
anxa3	1.24586	0.847795	0.264469	3.20565	0.00134756	0.0737892
hnrnpdl	86.0716	-0.1053	0.0328475	-3.20572	0.00134726	0.0737892
yme1l1	18.5019	-0.230106	0.0719088	-3.19997	0.00137444	0.0745228
kcnc4	3.41454	0.498311	0.155721	3.20002	0.00137416	0.0745228
nnmt	7.91089	0.330915	0.103725	3.19032	0.00142115	0.07668
fhl1	24.8425	0.188239	0.0590693	3.18674	0.00143886	0.0768853
rpl41	757.383	0.0347407	0.0108991	3.18747	0.00143522	0.0768853
gm11549	11.7848	0.270465	0.0853189	3.17005	0.00152413	0.0805528
tmem150c	11.5291	0.273072	0.0861682	3.16906	0.00152935	0.0805528
minar1	20.3637	-0.216582	0.0682848	-3.17174	0.00151528	0.0805528	Hollow	YES
marcks	196.387	0.0672689	0.021289	3.1598	0.00157875	0.0823708
mapre2	54.6576	0.126801	0.0401171	3.16078	0.0015735	0.0823708
ednrb	11.7197	-0.288699	0.0915002	-3.15518	0.001604	0.083295
syngr3	48.1404	0.134846	0.042789	3.15142	0.00162476	0.0839788
sez6	20.6407	0.203811	0.0648133	3.14459	0.00166322	0.085567
elmo1	16.3669	0.228163	0.0726397	3.14102	0.0016836	0.0862142
pbx1	99.6907	0.0936205	0.0298231	3.13919	0.00169414	0.0863541
sdhc	24.6724	-0.193545	0.061879	-3.12779	0.00176126	0.0885512
trappc6b	85.726	0.10067	0.0321744	3.12889	0.00175467	0.0885512
plcxd3	7.0498	0.344057	0.109909	3.13039	0.00174574	0.0885512
tubb2a	200.855	0.0658294	0.0210844	3.12218	0.00179517	0.0898477
ly6h	404.102	0.0464836	0.0148994	3.11983	0.00180958	0.0901612
gria4	10.7767	0.277673	0.0892819	3.11007	0.00187044	0.0926773
aldh3b2	1.72219	0.744748	0.239541	3.10906	0.00187684	0.0926773
cdh10	13.0047	0.252699	0.0815417	3.09902	0.00194161	0.0954494
calm3	369.598	0.0482303	0.0155723	3.09719	0.00195364	0.0956157
cobl	5.27143	0.390329	0.126171	3.09366	0.00197704	0.0963348
chst1	29.2857	0.168586	0.0545882	3.08832	0.0020129	0.0972257
tma7	318.616	0.0518021	0.0167674	3.08945	0.00200527	0.0972257
scn2a1	116.389	0.0852226	0.0276232	3.08518	0.0020343	0.0977584
btg1	19.2068	-0.216819	0.0703311	-3.08283	0.00205044	0.0977584	Hollow
ssbp2	64.6832	0.113967	0.0369598	3.08355	0.00204548	0.0977584
asph	31.6417	-0.167723	0.0544344	-3.0812	0.00206169	0.097873
sec61b	84.4462	0.0990901	0.0323933	3.05897	0.00222102	0.104986
sh3rf3	16.0704	-0.234738	0.0769164	-3.05186	0.00227429	0.107047
zbtb34	21.2675	-0.20442	0.0670177	-3.05024	0.00228655	0.107167
snca	438.4	0.0435566	0.0142988	3.04617	0.00231775	0.108172
ppargc1a	16.9083	-0.229572	0.0755178	-3.03997	0.00236604	0.109961
cst3	557.137	-0.157137	0.0517598	-3.0359	0.00239822	0.110991
htra1	14.72	-0.247102	0.0815557	-3.02986	0.00244666	0.11276
coro1a	24.3455	0.180278	0.0596871	3.02039	0.00252448	0.115385
tbc1d5	20.4209	-0.205525	0.0680456	-3.0204	0.00252437	0.115385
tmem191c	164.121	-0.0713909	0.023667	-3.01647	0.00255736	0.116407
nefl	18.9356	0.204852	0.0679789	3.01347	0.0025828	0.117084
apoe	362.307	-0.189795	0.0630426	-3.01058	0.00260752	0.117721
hrh3	8.55678	-0.321353	0.106926	-3.00537	0.00265261	0.11927	Hollow	YES
hlf	23.5614	-0.189411	0.0632636	-2.994	0.00275342	0.123302	Hollow	YES
fam49a	66.6043	-0.111606	0.0373169	-2.99076	0.0027828	0.124115
ngfrap1	205.543	0.062066	0.0208531	2.97635	0.00291701	0.12906
zbtb20	64.5191	-0.22194	0.0745551	-2.97686	0.00291217	0.12906	Hollow
malat1	3961.71	-0.0707102	0.0238488	-2.96494	0.00302746	0.133413
dusp19	4.42711	0.40822	0.13779	2.96262	0.00305031	0.133887
slc1a3	56.8237	-0.232715	0.0785894	-2.96115	0.00306488	0.133995
csnk1e	50.3284	0.123753	0.0418209	2.95911	0.00308525	0.134354
ramp3	30.258	-0.164419	0.0556086	-2.95672	0.0031093	0.134871
riiad1	9.90321	-0.294033	0.0995912	-2.9524	0.00315311	0.136236
kcng1	1.54769	0.693374	0.235083	2.94948	0.00318308	0.136465
lrrc73	64.3448	0.109417	0.0370882	2.95019	0.00317574	0.136465
fkbp1a	372.67	0.0456589	0.0155025	2.94527	0.00322678	0.136749
rasd2	12.8695	-0.513514	0.174237	-2.94721	0.00320655	0.136749	Hollow	YES
dbpht2	22.8196	0.18221	0.0618621	2.94542	0.00322522	0.136749
lefty2	11.3961	-0.427481	0.145682	-2.93435	0.00334252	0.140044
eif1	670.926	0.0339564	0.0115702	2.93482	0.00333739	0.140044
zfp706	161.082	0.0690528	0.0235242	2.9354	0.00333116	0.140044
sparcl1	81.4392	-0.098754	0.0336871	-2.93151	0.00337322	0.140797
ubl7	19.1879	-0.205143	0.070075	-2.92747	0.00341732	0.142102
1110015o18rik	3.93543	0.428149	0.14637	2.92512	0.00344322	0.14211
tmem108	28.7123	0.161563	0.0552194	2.92583	0.00343542	0.14211
pde4b	8.98663	0.284603	0.0973888	2.92233	0.00347419	0.142855
ywhaq	165.734	0.0677456	0.0232116	2.9186	0.00351604	0.14404
glul	46.6598	-0.129756	0.0446245	-2.90772	0.00364071	0.147421
2810428i15rik	81.3637	0.0959889	0.0330226	2.90677	0.00365187	0.147421
ckb	143.409	-0.073678	0.0253386	-2.90774	0.00364046	0.147421
cxadr	85.0203	0.0939981	0.0323095	2.90931	0.00362232	0.147421
brms1	2.14202	0.583192	0.201093	2.90011	0.00373038	0.150042
msrb2	16.5518	-0.382813	0.132183	-2.89608	0.00377853	0.150882
map6	27.6281	0.163252	0.0563541	2.8969	0.00376874	0.150882
shisa6	23.9729	-0.181001	0.062564	-2.89305	0.00381519	0.151696
9330160f10rik	1.81157	0.641762	0.221899	2.89213	0.00382634	0.151696
atp1b1	326.69	-0.0482792	0.0167337	-2.88515	0.00391229	0.153803
rap1gds1	28.9358	0.15859	0.0549815	2.88443	0.00392121	0.153803
sorcs1	16.0617	0.210506	0.0729524	2.88552	0.00390768	0.153803
acly	17.2173	0.205152	0.0711543	2.8832	0.00393652	0.153858
stk32c	7.31793	0.311177	0.108008	2.88106	0.00396336	0.154362
luzp1	28.0962	-0.166494	0.0578671	-2.87718	0.00401247	0.155726
mt2	21.0587	-0.192124	0.0670792	-2.86414	0.00418142	0.161716
rab18	65.4745	-0.107921	0.0377003	-2.8626	0.00420182	0.161938
rab6a	186.225	0.0626824	0.021906	2.86142	0.00421742	0.161975
ndufs7	79.3476	-0.097717	0.0341693	-2.85979	0.00423917	0.162247
grem2	2.86797	0.486233	0.170119	2.85819	0.00426068	0.162508
gm9844	47.5381	0.123116	0.0431068	2.85607	0.00428927	0.163036
xylt1	5.43746	0.354695	0.124576	2.84722	0.00441024	0.16706
phb2	53.4786	-0.118635	0.041773	-2.84	0.0045114	0.170309
bex2	254.823	0.0531909	0.0187498	2.83688	0.00455567	0.171396
eid1	125.198	0.075567	0.0266984	2.8304	0.00464902	0.172957
foxj3	12.7945	0.232081	0.0820172	2.82966	0.00465972	0.172957
ccdc28b	51.193	-0.12075	0.042642	-2.83172	0.0046299	0.172957
prmt2	32.5109	0.14717	0.0519764	2.83148	0.00463326	0.172957
eny2	43.1608	0.127692	0.0451441	2.82855	0.004676	0.172981
rgcc	26.3956	-0.16863	0.05971	-2.82415	0.00474064	0.174787
gucy1a3	42.7534	0.127765	0.0453971	2.81439	0.00488696	0.178989
d8ertd738e	131.817	0.073193	0.0259981	2.81532	0.0048728	0.178989
adgrl2	26.3482	-0.168491	0.0599347	-2.81125	0.00493499	0.179999
sostdc1	1.75774	0.63313	0.225276	2.81046	0.00494709	0.179999
gm19345	4.91374	0.366076	0.13044	2.80647	0.00500879	0.181564
kcnh5	5.0312	-0.396724	0.141406	-2.80556	0.00502292	0.181564
sgcb	15.02	0.212322	0.0757872	2.80155	0.00508579	0.183237
ache	8.73586	0.277031	0.0989429	2.79991	0.00511164	0.183487
ywhaz	268.215	0.0511454	0.0182726	2.79901	0.00512588	0.183487
pcdh15	10.8637	0.249439	0.0892571	2.79462	0.00519615	0.185402
xist	419.201	-0.0411858	0.0147525	-2.79178	0.00524198	0.186436
pcdh9	92.8734	-0.0877831	0.0314743	-2.78904	0.00528652	0.186819
zfp763	3.78229	0.414144	0.148474	2.78933	0.00528178	0.186819
gnaz	52.6127	0.113804	0.0409824	2.7769	0.00548804	0.192809
sept7	85.9734	0.0892426	0.0321395	2.77673	0.00549089	0.192809
gzf1	4.02392	-0.441344	0.159011	-2.77555	0.00551078	0.192895
aqp11	6.71062	0.312222	0.112728	2.7697	0.00561073	0.195158
rpl23	480.59	0.0378753	0.0136715	2.77039	0.00559891	0.195158
camta1	82.1935	-0.0929033	0.033571	-2.76737	0.0056511	0.195946
lmbrd2	4.14433	0.393925	0.14247	2.76497	0.00569287	0.196778
polr2m	75.2224	0.0948694	0.0343708	2.76017	0.00577712	0.199068
ephb2	10.6428	-0.262444	0.0951548	-2.75807	0.00581437	0.199729
tpbg	11.0975	-0.256814	0.0932482	-2.75409	0.00588561	0.20155
rgs10	20.9136	0.177637	0.0647393	2.74389	0.00607163	0.207279
spata2l	6.13074	0.322565	0.117676	2.74114	0.00612266	0.208009
pcyox1l	3.4946	-0.467021	0.170401	-2.74071	0.00613062	0.208009
gpcpd1	58.8436	-0.108766	0.0397285	-2.73774	0.00618635	0.208659
elk1	5.40078	0.343023	0.125434	2.73468	0.00624411	0.208659
gpr88	18.7274	-0.195655	0.0715081	-2.73613	0.00621673	0.208659	Hollow
arhgdib	6.26865	0.31944	0.116694	2.73742	0.00619223	0.208659
nav3	32.669	-0.146328	0.0534904	-2.73559	0.00622684	0.208659
sh3d19	8.02216	0.282095	0.103354	2.72941	0.00634479	0.2103
lsm5	31.3529	0.14423	0.0529055	2.72617	0.00640731	0.2103
kirrel3	9.25173	0.263165	0.0965253	2.72639	0.00640322	0.2103
usp2	25.2779	-0.166664	0.0611195	-2.72685	0.00639415	0.2103	Hollow	YES
tmie	2.3079	0.616193	0.22569	2.73026	0.00632837	0.2103
9530059o14rik	14.0775	0.327957	0.120281	2.72659	0.00639929	0.2103
kifap3	91.1445	0.0851643	0.0312777	2.72284	0.00647229	0.211398
pla2g6	1.74032	0.609018	0.223698	2.7225	0.00647898	0.211398
sigmar1	9.13843	0.26357	0.0968874	2.72037	0.00652088	0.21214
clasp2	32.5221	0.140614	0.0517836	2.71541	0.00661929	0.214082
secisbp2	4.09896	-0.429165	0.158012	-2.71603	0.00660704	0.214082
chm	13.6449	0.215092	0.0793309	2.71132	0.00670159	0.216111
nras	41.3058	0.124801	0.0461001	2.70717	0.006786	0.216936
cd9	22.4517	-0.174866	0.0645679	-2.70824	0.00676408	0.216936
ctsl	25.2094	-0.165783	0.0612191	-2.70803	0.00676832	0.216936
egr1	17.1759	-0.200515	0.0741644	-2.70365	0.00685817	0.218612
atpif1	628.496	0.0322843	0.0119693	2.69726	0.00699134	0.220886
fxyd7	126.702	0.0717449	0.0265805	2.69916	0.00695149	0.220886
tspan13	82.0751	0.0886319	0.0328626	2.69705	0.0069957	0.220886
ndufs8	46.8924	-0.120323	0.0446237	-2.6964	0.00700941	0.220886
prune2	4.33734	0.491923	0.182558	2.69462	0.00704697	0.221439
cbx3	67.9657	0.0967653	0.0359974	2.68812	0.00718559	0.225155
coq4	14.733	0.205727	0.0765681	2.68685	0.00721303	0.225322
klhl25	1.53632	0.632342	0.235575	2.68425	0.0072692	0.225322
gng2	147.792	0.0660264	0.0245911	2.68497	0.00725368	0.225322
nr1d1	18.0963	-0.194299	0.0723886	-2.68411	0.00727241	0.225322	Hollow	YES
akt1s1	36.1823	-0.136119	0.0507682	-2.68118	0.00733633	0.226668
pard3b	1.21356	-0.840316	0.314053	-2.67571	0.00745705	0.226916
postn	1.02996	0.773763	0.289117	2.67629	0.00744413	0.226916
bcan	20.1721	-0.183091	0.068439	-2.67524	0.00746754	0.226916
ldb2	7.77808	0.281326	0.105	2.67931	0.00737742	0.226916
hmgcr	34.3612	0.135347	0.050553	2.67733	0.00742122	0.226916
nptxr	37.5956	0.129469	0.0483758	2.67633	0.00744338	0.226916
ube2v2	69.2324	0.0957032	0.0357859	2.67433	0.00748797	0.226916
nlgn1	70.4408	0.0944327	0.0353752	2.66946	0.00759736	0.229602
spock3	22.3429	0.167337	0.0627794	2.66547	0.00768799	0.231708
igsf8	32.7965	-0.14168	0.0532893	-2.65869	0.00784447	0.235143
stxbp6	27.8608	-0.153528	0.0577298	-2.65943	0.00782734	0.235143
bex1	78.334	0.0894145	0.0336813	2.65472	0.00793742	0.23705
zfp580	65.3272	0.0979582	0.0369203	2.65324	0.0079724	0.23705
ankrd34c	1.93392	-0.642879	0.24224	-2.65389	0.00795692	0.23705
baiap2	40.5351	-0.127236	0.0479849	-2.65158	0.00801167	0.237579
rraga	24.0735	0.159483	0.0602685	2.6462	0.00814007	0.240741
klhl7	17.1413	0.187868	0.0712817	2.63557	0.00839965	0.246442
lcorl	16.7991	0.190211	0.0721642	2.63581	0.00839355	0.246442
slc6a1	34.7173	-0.137038	0.051966	-2.63707	0.00836246	0.246442
gnb4	29.0359	0.144899	0.0550049	2.63429	0.00843127	0.246715
hn1	404	0.0392532	0.014915	2.6318	0.00849339	0.247877
pdp1	7.09744	0.286645	0.109059	2.62834	0.00858033	0.249755
tusc3	42.0114	0.120349	0.0458383	2.62551	0.00865203	0.251181
sec23a	20.2865	0.171772	0.0654645	2.6239	0.00869303	0.251711
swi5	141.665	0.0656961	0.0250893	2.61849	0.00883196	0.253816
gabra3	8.23074	0.26625	0.101685	2.61839	0.00883458	0.253816
spag6l	2.19921	0.524661	0.200282	2.61962	0.00880278	0.253816
sdc3	43.5186	0.117915	0.045129	2.61285	0.00897906	0.257299
epha4	119.537	0.071099	0.0272513	2.60902	0.00908027	0.259527
ephx4	21.1127	-0.174112	0.0667836	-2.60711	0.00913109	0.260307
cxxc1	7.41055	-0.299597	0.114999	-2.6052	0.00918205	0.261086
fank1	1.49145	0.620706	0.23839	2.60374	0.00922119	0.261527
klhdc8b	4.27866	0.365664	0.140518	2.60226	0.00926126	0.261992
sirpa	12.4189	0.217473	0.0837381	2.59706	0.00940261	0.265312
dusp3	26.8018	0.147888	0.0570213	2.59356	0.00949889	0.267236
1700086l19rik	24.3543	0.155613	0.060017	2.59282	0.00951912	0.267236
mcoln1	3.56871	0.397097	0.153359	2.58933	0.00961637	0.269283
scg5	89.2517	-0.0829301	0.0320466	-2.5878	0.00965924	0.2698
nudt4	55.0743	0.103449	0.0400351	2.58396	0.00976727	0.272131
itpka	1.83588	0.563784	0.21827	2.58297	0.00979549	0.272231
stxbp1	107.155	0.0744358	0.0288471	2.58035	0.00986991	0.273612
1500009l16rik	49.8159	0.10878	0.0422052	2.5774	0.00995463	0.274852
itgb8	4.56708	0.351212	0.136284	2.57706	0.00996434	0.274852
grp	18.3804	-0.184246	0.0715447	-2.57525	0.0100167	0.275609
gbe1	4.93017	0.336607	0.13081	2.57324	0.0100751	0.276527
slc6a6	36.2167	0.126756	0.0493324	2.56943	0.0101865	0.278893
slc16a2	7.26312	0.277976	0.108337	2.56583	0.0102928	0.281108
necab1	35.1123	0.128297	0.0500611	2.56281	0.010383	0.282872
gpr6	1.34196	0.656206	0.256441	2.5589	0.0105003	0.283971
arhgef15	6.45361	0.294486	0.115062	2.55937	0.0104863	0.283971
nrsn1	119.502	-0.0709257	0.0277118	-2.5594	0.0104853	0.283971
rpl8	471.388	-0.0356254	0.0139268	-2.55805	0.0105262	0.283975
rrbp1	13.6357	-0.213633	0.0836701	-2.55328	0.0106715	0.286499
dhcr24	16.42	0.186344	0.0729665	2.55383	0.0106544	0.286499
zmat4	11.4394	-0.532481	0.20871	-2.5513	0.0107322	0.286739
fam124a	26.4723	0.147276	0.0577259	2.5513	0.0107323	0.286739
mfge8	18.4566	-0.18226	0.071564	-2.54682	0.0108711	0.289747
fam163a	4.41125	-0.417022	0.164267	-2.53869	0.0111269	0.295852
sox6	7.51502	-0.463385	0.182996	-2.53221	0.0113345	0.300649
cox6a2	34.465	-0.311182	0.123015	-2.52963	0.0114183	0.302148
rsad1	12.7766	-0.217992	0.0862407	-2.52772	0.0114806	0.30235
znhit2	20.2772	0.166164	0.065719	2.5284	0.0114585	0.30235
gpr37l1	14.167	-0.207283	0.082067	-2.52577	0.0115445	0.30331
cds2	16.6065	0.182139	0.0721916	2.52299	0.0116362	0.304275
clstn2	24.8113	-0.15513	0.0614863	-2.523	0.0116357	0.304275
fam171a1	7.85806	0.26302	0.104309	2.52154	0.0116843	0.30481
gabbr2	24.7903	0.149736	0.0594891	2.51703	0.0118347	0.307286
hnrnph3	20.0001	-0.173647	0.0689839	-2.5172	0.011829	0.307286
ccdc61	6.50976	0.288021	0.114591	2.51347	0.0119551	0.309686
tyro3	1.96733	0.525655	0.20941	2.51017	0.0120672	0.311858
gm9916	1.51214	0.599158	0.239458	2.50214	0.0123445	0.315579
lrrc3b	4.63884	0.336813	0.134469	2.50477	0.0122531	0.315579
snap91	102.582	0.0737365	0.029465	2.50252	0.0123314	0.315579
rnf215	10.0624	-0.243742	0.0973453	-2.50389	0.0122835	0.315579
pabpc1	105.381	0.0727672	0.0290851	2.50187	0.0123538	0.315579
gpm6a	289.447	0.0440019	0.0176004	2.50006	0.0124174	0.316471	Septa
scn3b	23.7173	0.152036	0.0609223	2.49557	0.0125753	0.31976
slc35f6	2.79493	0.441353	0.176922	2.49462	0.0126092	0.319887
hmgb1	183.563	0.0549709	0.0220708	2.49067	0.0127503	0.322725
cntnap5a	18.3965	0.170967	0.0688833	2.48198	0.0130655	0.326804
smim10l2a	14.918	0.189617	0.0764041	2.48177	0.0130733	0.326804
fabp7	225.435	-0.16611	0.0668599	-2.48446	0.0129749	0.326804
anapc13	42.1768	-0.116737	0.0470734	-2.47989	0.0131422	0.326804
wdpcp	3.64816	0.523878	0.210852	2.48457	0.0129707	0.326804
ccng1	8.99096	-0.25638	0.10339	-2.47974	0.0131478	0.326804
stard3nl	61.8961	0.0939306	0.0378623	2.48085	0.0131071	0.326804
zfand5	28.5813	0.137567	0.0554166	2.48242	0.0130495	0.326804
gpr27	13.3933	0.200011	0.0807452	2.47707	0.0132467	0.327789
scrt1	15.6454	-0.192431	0.0776819	-2.47717	0.0132428	0.327789
bc089491	3.3489	0.407514	0.164693	2.47438	0.0133468	0.329529
crip1	1.77081	0.550144	0.222411	2.47354	0.0133781	0.329565
igfbp2	17.9752	-0.179464	0.072691	-2.46886	0.0135546	0.332432
slc25a33	9.3487	-0.251037	0.101673	-2.46906	0.013547	0.332432
ogt	73.2982	-0.0875994	0.0355084	-2.467	0.0136249	0.332681
hook2	4.13124	0.353728	0.143358	2.46745	0.013608	0.332681
b3galnt1	10.8066	0.221049	0.089632	2.46619	0.013656	0.332707
itpa	27.4681	-0.143994	0.0584584	-2.4632	0.0137705	0.333359
car2	12.148	-0.219043	0.088931	-2.46306	0.0137755	0.333359
camk2d	13.5153	0.197433	0.0801716	2.46263	0.0137922	0.333359
limch1	29.3181	-0.139401	0.0566131	-2.46234	0.0138033	0.333359
eepd1	2.65801	-0.494134	0.200754	-2.46139	0.01384	0.333516
tef	19.384	-0.171437	0.0697216	-2.45888	0.0139373	0.335131
rab8b	2.36829	0.47409	0.192982	2.45665	0.0140239	0.336101
chst2	16.6116	-0.185236	0.075461	-2.45473	0.0140992	0.336101
eif3d	17.5458	-0.179383	0.0730654	-2.45511	0.0140843	0.336101
cpne8	13.0513	0.200224	0.0815486	2.45527	0.0140777	0.336101
gtf2b	5.40419	-0.331821	0.135228	-2.4538	0.0141357	0.336247
b3gat2	2.52195	0.522518	0.213291	2.44979	0.0142941	0.339285
tmem160	61.481	0.0928925	0.037957	2.44731	0.0143928	0.340898
ifi27l2a	1.58611	-0.655092	0.267861	-2.44564	0.0144596	0.341019
atp9b	4.41315	0.338096	0.138241	2.4457	0.0144569	0.341019
1110051m20rik	17.1749	0.173979	0.0711677	2.44463	0.0145	0.341062
timp2	34.0544	0.124322	0.0508831	2.44329	0.014554	0.341062
pde8b	11.5537	-0.22186	0.0908037	-2.44329	0.0145539	0.341062	Hollow	YES
zfp788	3.65677	0.369193	0.15119	2.44191	0.01461	0.341651
arpc5	155.469	0.0585761	0.0239976	2.44092	0.0146499	0.341837
b4galt6	53.3469	0.0995243	0.0407856	2.44019	0.0146797	0.341837
pcbd1	6.68473	0.275379	0.112996	2.43706	0.0148071	0.344078
wasf1	80.9467	0.0806641	0.0331499	2.43331	0.0149614	0.345487
klhdc4	7.33742	-0.280186	0.115101	-2.43425	0.0149226	0.345487
rbfox3	141.691	-0.0619106	0.0254368	-2.4339	0.0149372	0.345487
tmem151a	50.3775	0.101964	0.0419355	2.43146	0.0150381	0.346534
utp3	14.3955	-0.197874	0.0814818	-2.42844	0.0151639	0.347263
zfp326	27.2078	-0.142618	0.0586965	-2.42976	0.0151088	0.347263
sec11c	56.0855	-0.098732	0.0406549	-2.42854	0.0151599	0.347263
tm7sf3	4.71749	0.324594	0.133746	2.42695	0.0152266	0.347977
cd46	2.5809	-0.502767	0.207792	-2.41957	0.0155387	0.354378
lypd6b	8.61264	0.241602	0.0999258	2.41782	0.0156139	0.354631
ndufb9	160.373	-0.057872	0.0239293	-2.41845	0.0155867	0.354631
s100a11	6.25322	0.386609	0.159965	2.41682	0.0156565	0.354871
9330104g04rik	1.98412	0.518529	0.214979	2.412	0.0158652	0.357765
cluap1	7.8264	-0.269831	0.11182	-2.41309	0.0158181	0.357765
hrasls	2.98044	-0.462115	0.191619	-2.41163	0.0158813	0.357765
dgcr6	61.7577	0.0913328	0.0378921	2.41034	0.0159376	0.358304
ap2a2	43.9386	0.108151	0.0448943	2.40901	0.0159958	0.358883
hccs	47.1063	-0.194347	0.0807035	-2.40816	0.0160333	0.358996
cks1b	8.81429	0.238073	0.0990064	2.40463	0.016189	0.361325
cyb561d1	2.13435	-0.55785	0.232091	-2.40358	0.0162353	0.361325
cav1	2.0236	0.50085	0.20834	2.404	0.0162168	0.361325
slc25a5	76.5802	-0.0834985	0.0347615	-2.40204	0.0163039	0.361397
bc005537	59.0119	0.0932802	0.0388243	2.40262	0.0162779	0.361397
sept2	20.7597	0.155136	0.0646375	2.40009	0.0163912	0.362607
gm16701	2.19684	0.477959	0.199259	2.39868	0.0164542	0.363273
kcnj3	16.011	-0.184534	0.0770072	-2.39633	0.0165603	0.364597
tmem245	10.2351	0.220062	0.0918737	2.39527	0.0166083	0.364597
ndrg2	30.0904	-0.133376	0.0556855	-2.39516	0.016613	0.364597
tmem184c	20.1551	0.157156	0.065641	2.39418	0.0166578	0.364855
whrn	2.32372	-0.522163	0.218502	-2.38974	0.0168604	0.367841	Hollow	YES
zfp780b	6.97675	-0.283092	0.118462	-2.38973	0.0168606	0.367841
rsf1	18.6532	-0.170331	0.0713079	-2.38866	0.0169098	0.368188
1110046j04rik	6.36895	0.276191	0.115666	2.38784	0.0169476	0.368286
gpatch11	12.1873	-0.21154	0.0886469	-2.38632	0.0170179	0.369089
xpr1	35.2852	0.119514	0.0501558	2.38286	0.0171787	0.369676
eprs	22.4003	-0.15425	0.0647114	-2.38366	0.0171415	0.369676
emx1	59.3305	-0.0940667	0.0394722	-2.38311	0.0171669	0.369676
2310022b05rik	12.0099	-0.212227	0.0890466	-2.38332	0.0171572	0.369676
nrxn1	317.66	-0.040367	0.0169558	-2.38072	0.017279	0.371114
ndufa13	146.431	-0.05959	0.0250576	-2.37812	0.0174013	0.372293
usp22	67.2837	0.0864025	0.0363298	2.37828	0.0173936	0.372293
ccdc6	8.1537	0.243631	0.10253	2.37619	0.0174925	0.373522
ryr3	4.0556	0.343428	0.144682	2.37367	0.0176124	0.375357
gm8281	2.55353	0.440759	0.185751	2.37284	0.0176517	0.375472
gm43194	3.6323	0.437647	0.184584	2.37099	0.0177403	0.37591
rps14	801.695	-0.0252484	0.0106469	-2.37144	0.0177191	0.37591
capza2	109.265	0.0676989	0.0285806	2.3687	0.0178506	0.376805
sumf1	1.51597	0.568915	0.24015	2.369	0.0178364	0.376805
usp34	32.388	0.123222	0.0520814	2.36596	0.0179836	0.378889
gabra2	31.4052	0.12506	0.0529048	2.36387	0.0180849	0.3803
clec11a	1.90618	0.506062	0.214165	2.36296	0.0181298	0.38052
usp46	17.8502	0.165095	0.069932	2.3608	0.0182357	0.382018
nrip3	23.3384	0.144485	0.0612856	2.35757	0.0183952	0.384629
lig3	5.01939	-0.329239	0.139696	-2.35683	0.0184318	0.384668
dnttip1	7.56022	-0.266907	0.113298	-2.35579	0.0184834	0.385019
abcb7	3.47661	0.387295	0.164601	2.35294	0.0186257	0.385802
plppr5	10.3208	0.215401	0.091496	2.35421	0.018562	0.385802
aqp4	16.2917	-0.178794	0.0759809	-2.35314	0.0186157	0.385802
acyp1	17.587	-0.172466	0.0734025	-2.34959	0.018794	0.388561
hcfc1r1	99.8765	0.0702279	0.0299084	2.3481	0.0188693	0.389391
tmem246	36.0534	0.116278	0.049558	2.34631	0.0189603	0.390486
nxph1	22.3085	-0.249076	0.106217	-2.34498	0.0190283	0.390486
sec14l2	1.32762	-0.721844	0.307788	-2.34526	0.0190137	0.390486
rab42	1.00925	0.691549	0.295334	2.34158	0.0192022	0.392598
dusp6	12.6959	0.193068	0.082435	2.34206	0.0191775	0.392598
trpc1	5.93157	0.280477	0.119958	2.33814	0.0193802	0.395507
acot7	45.9611	0.102621	0.0439198	2.33656	0.0194622	0.396449
ehbp1l1	31.2777	0.1237	0.0530213	2.33302	0.0196471	0.399479
commd8	19.2658	-0.16292	0.0698905	-2.33107	0.0197495	0.400823
abi2	65.6218	0.0855169	0.0367766	2.32531	0.0200556	0.401585
rgs13	11.5903	-0.304092	0.130836	-2.32422	0.0201137	0.401585
lrp1b	19.6009	0.155458	0.0668494	2.32549	0.0200458	0.401585
tshz2	6.00844	0.781967	0.336398	2.32453	0.020097	0.401585
prkcz	48.9282	0.0990309	0.0425624	2.32672	0.0199801	0.401585
tmem33	19.749	-0.160309	0.0689657	-2.32447	0.0201001	0.401585
pdgfa	47.2392	0.100994	0.0433634	2.32902	0.0198579	0.401585
gas7	72.2095	0.0814637	0.0350137	2.32662	0.0199855	0.401585
derl1	8.01507	-0.254995	0.109706	-2.32436	0.0201064	0.401585
rab22a	16.197	0.169941	0.07324	2.32034	0.0203226	0.404134
rab33b	8.78678	0.229416	0.0989516	2.31846	0.0204241	0.404134
wdr1	20.1143	0.153303	0.0661124	2.31882	0.0204047	0.404134
ttc9b	231.028	0.0457261	0.0197163	2.3192	0.0203844	0.404134
nsd1	29.2465	-0.131064	0.056476	-2.3207	0.020303	0.404134
wnt9a	1.32514	0.593983	0.256416	2.31648	0.0205321	0.404823
atg101	10.2895	0.213348	0.0920936	2.31664	0.0205233	0.404823
lsamp	64.5403	0.0859052	0.0371294	2.31367	0.0206858	0.407128
rap2b	23.6593	0.140892	0.0609277	2.31245	0.0207526	0.407228
4732491k20rik	3.97964	0.336545	0.145549	2.31224	0.0207645	0.407228
gls	30.6936	0.123819	0.0535763	2.31108	0.0208282	0.407754
glb1	4.03087	0.333141	0.144548	2.3047	0.0211834	0.413975
fn1	1.2585	0.606407	0.263369	2.3025	0.0213071	0.414196
1110017d15rik	4.30087	0.323624	0.140538	2.30276	0.0212925	0.414196
bbc3	18.0372	0.160855	0.0698504	2.30284	0.0212876	0.414196
zfp511	25.8307	-0.138722	0.0602745	-2.30151	0.0213629	0.414552
hdgf	45.7636	-0.103352	0.0450105	-2.29619	0.0216653	0.418951
dusp14	12.4598	-0.200441	0.0872863	-2.29636	0.0216551	0.418951
cops5	23.0351	0.141671	0.0618001	2.29241	0.0218821	0.419609
tmem87b	6.83481	-0.272044	0.118746	-2.29097	0.0219649	0.419609
trappc2	25.1233	0.13577	0.0591843	2.29403	0.021789	0.419609
4632404h12rik	2.86386	-0.446812	0.194839	-2.29323	0.0218347	0.419609
chchd2	558.242	0.0291003	0.0126999	2.29139	0.0219409	0.419609
cd63	24.4458	-0.141501	0.0616582	-2.29492	0.0217376	0.419609
kcnj6	3.56488	-0.400056	0.174536	-2.29212	0.021899	0.419609
atp5h	86.0061	-0.0746312	0.0327024	-2.28213	0.0224818	0.428743
ldha	58.2566	0.0891038	0.0390722	2.28049	0.0225785	0.429107
cnrip1	140.504	0.0575139	0.0252175	2.28071	0.0225656	0.429107
mtss1	36.6749	0.11172	0.0490362	2.27832	0.0227077	0.430823
gm14296	8.22007	0.233128	0.102483	2.27479	0.0229182	0.432873
1700113a16rik	1.26725	-0.667612	0.293464	-2.27494	0.0229096	0.432873
raf1	28.3219	-0.130493	0.0573712	-2.27455	0.0229332	0.432873
pkn2	23.4872	-0.143393	0.0630963	-2.2726	0.0230504	0.433606
pou3f1	55.3003	-0.0927727	0.0408113	-2.27321	0.0230134	0.433606
fam188a	38.1213	0.10921	0.0480799	2.27142	0.0231218	0.433657
prkcg	3.44858	0.356154	0.156817	2.27114	0.0231385	0.433657
cdh15	8.5987	0.22857	0.100665	2.27061	0.0231707	0.433657
eapp	17.5181	0.159839	0.0705898	2.26434	0.0235535	0.440076
vps45	3.86756	0.33502	0.148145	2.26143	0.0237325	0.440444
rgs3	13.6037	-0.188481	0.0833225	-2.26207	0.0236933	0.440444
spag7	4.7848	0.300303	0.132785	2.26157	0.0237241	0.440444
spin1	40.5012	0.106054	0.0468706	2.26269	0.0236547	0.440444
eif2b1	8.84799	0.224723	0.0994684	2.25924	0.0238682	0.442221
akr1b10	4.36826	-0.472178	0.209117	-2.25796	0.0239484	0.442965
kcnmb4	22.7594	0.140189	0.062127	2.25648	0.0240404	0.443836
id2	123.733	0.060666	0.0268919	2.25592	0.0240757	0.443836
zdhhc7	7.45411	0.242663	0.10766	2.25396	0.0241984	0.444616
rab10	110.671	0.0640238	0.0284028	2.25414	0.0241874	0.444616
sstr2	6.34322	-0.277008	0.12301	-2.25192	0.0243275	0.445508
dact2	8.19198	-0.244053	0.10836	-2.25224	0.024307	0.445508
osbpl1a	183.138	-0.0503301	0.0223572	-2.25118	0.0243741	0.445623
apbb2	29.0557	-0.12772	0.0567633	-2.25004	0.0244461	0.446202
smyd3	3.63781	0.342397	0.152287	2.24836	0.0245529	0.446731
eef1e1	54.5009	0.0908567	0.0404189	2.24788	0.0245841	0.446731
rab3c	12.5341	0.1873	0.0833377	2.24748	0.0246093	0.446731
pla2g7	15.6137	-0.174064	0.0774631	-2.24705	0.0246367	0.446731
tlcd1	6.00612	-0.353826	0.157569	-2.24553	0.0247339	0.447164
epc1	13.0682	0.183207	0.0815914	2.24542	0.0247414	0.447164
gtpbp10	1.56031	0.524475	0.234073	2.24064	0.0250492	0.451989
1110008p14rik	136.273	0.0572836	0.0256494	2.23333	0.0255273	0.456889
ptpn5	20.0769	0.147655	0.0660432	2.23573	0.0253697	0.456889
tmem5	25.2606	0.131785	0.0590023	2.23356	0.0255121	0.456889
glud1	21.444	-0.147946	0.0661989	-2.23487	0.0254256	0.456889
ablim3	4.47474	0.361124	0.161657	2.2339	0.0254899	0.456889
slc4a4	7.89485	-0.244679	0.109641	-2.23165	0.0256383	0.45775
zfp575	13.5963	0.178822	0.0801408	2.23135	0.0256582	0.45775
rbmx	20.3049	-0.151647	0.0680738	-2.22769	0.0259015	0.46064
rasl10a	54.8284	-0.0912878	0.0409793	-2.22766	0.0259034	0.46064	Hollow	YES
bhlhe22	55.4118	-0.0909905	0.0408584	-2.22697	0.0259492	0.460712
ptprj	8.79488	-0.231224	0.103912	-2.2252	0.0260679	0.462079
stmn3	524.78	0.0291273	0.0130975	2.22388	0.0261565	0.462907
irs2	5.15851	0.28432	0.127894	2.22309	0.02621	0.463114
camsap2	19.3521	0.149368	0.0672263	2.22187	0.0262922	0.463825
cxxc4	20.2912	0.146019	0.0657591	2.22052	0.0263838	0.464699
gstm1	13.2503	-0.187064	0.0843345	-2.21812	0.026547	0.464706
tpd52l1	4.31269	0.400483	0.180559	2.21802	0.0265537	0.464706
wdr18	17.2107	0.158163	0.0713272	2.21742	0.0265942	0.464706
cpne2	5.05054	0.289629	0.130589	2.21787	0.0265637	0.464706
slc15a2	3.14961	-0.395945	0.178501	-2.21817	0.0265433	0.464706
1810043h04rik	28.2785	0.123751	0.0558602	2.21537	0.0267344	0.466419
map4	58.7871	0.0861451	0.0388967	2.21472	0.0267795	0.466469
otud7b	2.36064	-0.469018	0.211897	-2.21342	0.0268686	0.466552
sema6a	18.3621	0.152959	0.0690959	2.21373	0.0268475	0.466552
ppp3cb	87.8127	0.0703813	0.0318372	2.21066	0.0270592	0.467659
mlc1	9.41971	-0.222331	0.100553	-2.21108	0.0270305	0.467659
atp5g2	119.981	-0.0611836	0.0276664	-2.21148	0.0270029	0.467659
atp6v1f	150.031	0.0539005	0.0244132	2.20784	0.0272552	0.467958
cmas	17.0672	0.158399	0.071759	2.20737	0.027288	0.467958
map1s	3.96673	-0.348005	0.157627	-2.20777	0.0272601	0.467958
gadd45g	26.5774	-0.130497	0.0591158	-2.20748	0.0272803	0.467958
jakmip2	20.2551	0.144896	0.0655717	2.20974	0.0271231	0.467958
trp53i11	4.40783	0.355836	0.16133	2.20564	0.027409	0.469306
adgrg2	1.07523	0.618243	0.280398	2.20488	0.0274626	0.469496
atp2b4	11.2618	0.194715	0.0883589	2.20369	0.0275462	0.469699
rps8	506.177	-0.0295831	0.0134284	-2.20302	0.0275932	0.469699
wipf3	3.84629	0.328444	0.149096	2.2029	0.0276019	0.469699
fstl5	7.21796	0.240956	0.109438	2.20175	0.027683	0.470355
spint2	3.8744	0.371817	0.169063	2.19928	0.0278581	0.472605
etnk2	1.36966	0.554194	0.252463	2.19515	0.0281531	0.475422
pnisr	87.5054	-0.0711534	0.0324115	-2.19531	0.0281412	0.475422
asns	9.94247	0.205142	0.0934513	2.19517	0.0281511	0.475422
camk4	77.7675	0.0741544	0.0338105	2.19324	0.0282902	0.477008
ina	44.3799	0.0979357	0.0446743	2.19222	0.0283639	0.477523
psenen	38.0867	-0.108182	0.0493944	-2.19016	0.0285124	0.479294
ube2c	1.91932	0.620849	0.283678	2.18857	0.0286278	0.480504
arl6ip1	73.1753	0.0764425	0.0349477	2.18734	0.0287178	0.481283
casc3	8.19648	0.223963	0.102422	2.18666	0.0287673	0.481384
fry	37.2518	0.106248	0.0486226	2.18516	0.0288772	0.482494
cldn3	1.19894	0.587365	0.268958	2.18386	0.0289727	0.482632
psme3	9.64879	0.206772	0.0946619	2.18432	0.0289387	0.482632
nr4a3	2.69383	0.424135	0.194688	2.17854	0.0293658	0.484025
ugcg	24.0528	0.131867	0.060528	2.17862	0.0293599	0.484025
cplx1	82.8152	-0.0726501	0.0333564	-2.17799	0.0294064	0.484025
asphd2	33.8004	-0.114194	0.0524256	-2.17821	0.0293903	0.484025
pop4	19.2023	-0.15196	0.0696508	-2.18175	0.0291282	0.484025
pcnp	50.5266	0.0912964	0.0418647	2.18075	0.029202	0.484025
gng13	17.8931	0.152868	0.0701605	2.17884	0.0293439	0.484025
fra10ac1	8.84881	0.215514	0.0989192	2.17869	0.0293546	0.484025
mmachc	2.21758	0.431446	0.198444	2.17414	0.0296948	0.486433
wbp1	21.537	-0.143157	0.0658975	-2.17241	0.0298247	0.486433
cbarp	46.7419	0.0945305	0.0434913	2.17355	0.0297391	0.486433
2810402e24rik	1.95758	0.454922	0.2093	2.17354	0.0297397	0.486433
vstm2a	31.7093	0.114775	0.0528447	2.17193	0.0298606	0.486433
mpc1	187.818	-0.0479664	0.0220627	-2.1741	0.0296979	0.486433
fkbp2	59.4581	-0.0854785	0.0393444	-2.17257	0.0298126	0.486433
pcdh7	81.0595	-0.0732734	0.0337685	-2.16987	0.0300163	0.486819
srrm2	124.646	-0.0587859	0.0270845	-2.17046	0.0299719	0.486819
b3galt4	2.10913	-0.485861	0.223888	-2.1701	0.0299991	0.486819
ube2w	51.6766	0.0897778	0.0414555	2.16564	0.0303384	0.488764
smap1	31.2251	0.115309	0.0532722	2.16453	0.0304237	0.488764
gata3	3.22673	-0.380682	0.176143	-2.16121	0.0306793	0.488764
celf1	58.8862	-0.0855882	0.0395765	-2.1626	0.030572	0.488764
ptprz1	78.38	-0.160154	0.0742013	-2.15837	0.0308987	0.488764
chn2	21.1731	0.139369	0.0645559	2.15888	0.0308593	0.488764
rab7	93.4547	-0.0679789	0.0313859	-2.16591	0.0303183	0.488764
mesp1	1.09903	-0.746193	0.345141	-2.16199	0.0306187	0.488764
zwint	107.435	0.0624786	0.0288336	2.16687	0.0302451	0.488764	Septa
fermt2	16.0053	-0.165993	0.0767042	-2.16407	0.0304593	0.488764
cldn10	9.8047	-0.212262	0.0983248	-2.15878	0.0308672	0.488764
elof1	52.8788	0.0888094	0.0410399	2.16398	0.0304662	0.488764
hepacam	5.41009	-0.289069	0.133661	-2.1627	0.0305641	0.488764
mtif2	11.3943	-0.196994	0.0912802	-2.15813	0.0309181	0.488764
zfp354a	1.46475	0.544804	0.252463	2.15795	0.0309316	0.488764
neurod2	83.3197	-0.0717236	0.0332326	-2.15823	0.0309098	0.488764
mctp1	12.8429	-0.185467	0.0856862	-2.16449	0.0304267	0.488764
tmem181a	29.4438	0.118313	0.0547479	2.16104	0.0306919	0.488764
egfl7	8.53488	-0.228013	0.105737	-2.15642	0.0310511	0.489254
nup133	2.17633	0.434972	0.201708	2.15644	0.0310493	0.489254
ddx26b	3.1944	0.365815	0.169991	2.15197	0.0313995	0.49404
ube2e3	78.2355	0.072589	0.0337599	2.15016	0.0315429	0.494304
lysmd1	3.29566	-0.37392	0.17383	-2.15106	0.0314713	0.494304
nrip1	25.0353	0.127313	0.0592139	2.15006	0.0315504	0.494304
rasa4	2.20928	-0.477049	0.222128	-2.14763	0.0317432	0.494523
dll3	4.34839	0.301261	0.140226	2.14839	0.0316828	0.494523
map2k1	15.8309	0.159305	0.0741676	2.14791	0.0317208	0.494523
brd9	26.0949	-0.128124	0.0596319	-2.14857	0.0316681	0.494523
slc39a3	9.19534	0.208361	0.0970651	2.14662	0.0318239	0.495083
grb14	4.93296	0.284299	0.132638	2.14343	0.0320789	0.495253
scand1	95.4224	-0.0665814	0.0310819	-2.14213	0.032183	0.495253
ttc14	99.1298	-0.0651688	0.0303984	-2.14382	0.0320473	0.495253
ccdc39	6.34838	0.248448	0.11594	2.14291	0.0321207	0.495253
tle1	7.42801	-0.24406	0.113764	-2.14531	0.031928	0.495253
gale	5.90506	0.25778	0.120345	2.14201	0.032193	0.495253
mrpl35	19.3948	0.144165	0.0672687	2.14312	0.0321033	0.495253
mapt	300.878	0.0370483	0.0172817	2.14379	0.0320501	0.495253
inpp1	6.36288	0.250082	0.116886	2.13953	0.0323927	0.497633
zfp105	1.16745	-0.674543	0.315925	-2.13513	0.0327502	0.502427
mat2a	81.3941	-0.071748	0.0336146	-2.13443	0.0328077	0.502612
efhd2	3.49365	-0.399922	0.187541	-2.13245	0.0329702	0.504404
fam229a	3.82133	-0.362869	0.170328	-2.13041	0.0331377	0.505568
gfod1	2.31615	0.422169	0.198119	2.13089	0.0330982	0.505568
tspyl2	10.3504	-0.204469	0.096028	-2.12926	0.0332324	0.505617
khdrbs3	18.8238	0.145044	0.0681087	2.1296	0.0332047	0.505617
ddit3	11.4773	-0.194318	0.091357	-2.12702	0.0334185	0.50775
lamtor5	77.4111	-0.0734227	0.0345462	-2.12535	0.0335576	0.508466
ociad1	53.7237	0.0863772	0.0406378	2.12553	0.033542	0.508466
khdrbs1	39.625	-0.102474	0.0483048	-2.12141	0.0338869	0.50973
wasf2	2.12228	-0.478751	0.225508	-2.12299	0.0337544	0.50973
kitl	22.3074	-0.2251	0.106127	-2.12105	0.0339175	0.50973	Hollow	YES
pvrl1	17.9575	-0.153313	0.0722588	-2.12172	0.033861	0.50973
trap1	4.57052	-0.312964	0.147514	-2.12158	0.0338728	0.50973
ndufaf7	10.4101	0.193887	0.0913493	2.12248	0.0337978	0.50973
arhgap33	22.7219	0.131804	0.0622266	2.11813	0.0341639	0.509749
tgfb1i1	11.651	0.182491	0.0861326	2.11872	0.0341138	0.509749
smim18	11.8943	0.181384	0.0856471	2.11781	0.0341912	0.509749
atg4d	4.45849	0.292155	0.13799	2.11722	0.0342414	0.509749
dek	43.088	-0.0985053	0.0464629	-2.12009	0.0339988	0.509749
ap4s1	26.2836	0.122514	0.0578378	2.11823	0.0341554	0.509749
mrps6	20.3087	0.13927	0.0657732	2.11743	0.0342231	0.509749
dok4	28.0362	0.118632	0.0560586	2.11622	0.0343258	0.51032
terf1	3.9853	0.308962	0.146206	2.1132	0.034584	0.512491
dclk1	194.138	0.0454234	0.0215136	2.11138	0.0347395	0.512491
snx7	21.9998	0.133261	0.0631015	2.11185	0.0346989	0.512491
mtpn	120.658	0.0574836	0.0272271	2.11126	0.0347499	0.512491
vgll4	10.2723	-0.202326	0.0957979	-2.11201	0.0346858	0.512491
ubl5	156.374	0.0505647	0.0239435	2.11184	0.0347004	0.512491
ptbp2	34.0503	0.107408	0.0508934	2.11045	0.0348194	0.512833
ndrg3	89.1543	-0.0677195	0.0320977	-2.10979	0.0348764	0.51299
cers6	13.3154	-0.17697	0.0840979	-2.10434	0.0353491	0.517191
bcat2	1.286	0.545006	0.258976	2.10447	0.0353378	0.517191
mkl2	13.5476	0.168265	0.07995	2.10462	0.0353242	0.517191
mt-nd3	48.5659	0.0899906	0.0427493	2.10508	0.0352845	0.517191
mpdz	2.21197	0.417681	0.198551	2.10365	0.0354092	0.517381
cd200	94.8059	0.0645715	0.0307028	2.10312	0.0354557	0.517381
nr2f2	4.68038	0.386042	0.183745	2.10096	0.0356441	0.5186
smpd1	25.8273	-0.126403	0.060176	-2.10056	0.0356798	0.5186
stmn4	270.11	0.03829	0.0182262	2.10082	0.0356566	0.5186
ppia	903.22	-0.0210763	0.0100364	-2.09997	0.0357313	0.518667
mob4	33.017	0.10861	0.0517581	2.09841	0.0358689	0.519981
txndc17	73.7507	0.0729511	0.0348281	2.0946	0.0362062	0.521721
smg6	7.99731	-0.229082	0.109322	-2.09548	0.0361284	0.521721
snn	87.7912	0.066798	0.0318937	2.0944	0.0362247	0.521721
qk	25.3264	-0.127137	0.0606433	-2.09646	0.0360411	0.521721
taf7	7.9988	-0.22939	0.109479	-2.09529	0.0361454	0.521721
klhdc8a	16.5047	0.152154	0.0726757	2.0936	0.0362959	0.522066
gtf2i	20.6757	-0.140747	0.0672506	-2.09287	0.036361	0.522324
plxdc2	11.8787	-0.186667	0.0892329	-2.0919	0.0364471	0.522881
cth	1.38953	-0.59392	0.284338	-2.08878	0.0367274	0.5236
plpp3	22.3955	-0.135172	0.0646546	-2.09068	0.0365572	0.5236
sesn1	8.68188	-0.218539	0.1046	-2.08929	0.0366815	0.5236
vat1l	5.23097	0.268148	0.12838	2.08871	0.0367339	0.5236
mt-nd1	3296.32	0.0366657	0.0175522	2.08895	0.0367122	0.5236
nsun6	2.58652	-0.425188	0.203929	-2.08498	0.0370709	0.527283
slc24a3	16.1637	0.153718	0.0737329	2.0848	0.0370876	0.527283
lekr1	5.62062	-0.273588	0.131409	-2.08196	0.0373465	0.528398
5730508b09rik	3.15265	0.353523	0.169687	2.08339	0.0372159	0.528398
trappc4	62.8182	0.0782753	0.0375991	2.08184	0.0373571	0.528398
ercc8	11.9271	-0.185445	0.0890523	-2.08243	0.0373035	0.528398
6330409d20rik	1.25138	0.544879	0.261969	2.07994	0.0375309	0.530178
chl1	96.1618	0.0633391	0.0304695	2.07877	0.0376383	0.531017	Septa
3830406c13rik	13.9209	0.164363	0.0791194	2.0774	0.0377644	0.532118
tcerg1l	1.47611	0.501778	0.241795	2.07522	0.0379665	0.533314
bean1	14.2405	0.16235	0.0782185	2.07559	0.0379317	0.533314
lpp	3.8237	-0.334266	0.161098	-2.07492	0.037994	0.533314
chml	3.30336	0.344442	0.166174	2.07278	0.0381928	0.534748
uqcrh	246.395	-0.0399693	0.0192813	-2.07296	0.0381761	0.534748
grk5	1.64999	0.4865	0.234956	2.0706	0.0383958	0.53691
pkp4	18.2315	0.144437	0.0697921	2.06953	0.0384964	0.53749
slc35a2	13.7739	-0.171802	0.0830729	-2.06809	0.0386317	0.53749
tet3	26.37	-0.123093	0.0595141	-2.0683	0.0386115	0.53749
1700016k19rik	1.52637	0.498444	0.240971	2.06848	0.0385947	0.53749
cat	8.93886	-0.213456	0.103296	-2.06646	0.0387852	0.538949
pole4	80.0372	0.0691072	0.0334571	2.06554	0.0388715	0.53947
cep97	1.88844	-0.494045	0.239439	-2.06334	0.0390801	0.541119
rpl10a	306.687	0.0353223	0.0171217	2.06301	0.0391114	0.541119
cpne5	9.55505	0.196367	0.095197	2.06274	0.0391371	0.541119
hacd1	30.8189	0.110352	0.0535515	2.06066	0.0393354	0.541393
cnksr2	32.8468	0.106662	0.0517974	2.05921	0.0394744	0.541393
3110043o21rik	5.78534	0.251854	0.122309	2.05916	0.0394789	0.541393
dnm2	6.60651	0.234181	0.113573	2.06194	0.0392133	0.541393
dhx30	85.3279	-0.0674616	0.0327329	-2.06097	0.0393056	0.541393
lrrfip2	9.75269	-0.204269	0.0992125	-2.05891	0.0395031	0.541393
gm5431	2.09966	0.419334	0.203705	2.05854	0.0395388	0.541393
fam177a	59.1922	0.079767	0.0387513	2.05843	0.0395485	0.541393
hsph1	32.5861	0.107177	0.0520892	2.05757	0.0396312	0.541855
map2k2	54.9018	0.0828392	0.0402727	2.05696	0.0396905	0.541996
tsc22d4	23.4698	-0.129318	0.0629042	-2.05579	0.0398026	0.542856
hsp90ab1	353.389	0.0327894	0.015955	2.05512	0.0398672	0.543068
serinc1	119.075	0.0562344	0.0273956	2.05268	0.0401039	0.545535
sla	28.2667	0.114883	0.0559796	2.05223	0.040147	0.545535
luc7l2	62.8333	-0.0785721	0.0383216	-2.05034	0.0403316	0.546701
sgk1	32.0657	-0.110083	0.0536793	-2.05075	0.0402914	0.546701
siae	1.2043	0.545057	0.266024	2.0489	0.0404716	0.547928
gja1	11.5981	-0.183998	0.0898272	-2.04835	0.0405254	0.547984
ddx55	16.0975	-0.156142	0.0763026	-2.04636	0.0407213	0.549962
eif3a	52.6867	0.0838957	0.04104	2.04424	0.0409299	0.552105
ccnc	10.068	0.18964	0.0928007	2.04352	0.0410011	0.552391
stradb	30.511	-0.112973	0.0553756	-2.04012	0.0413383	0.552718
arl4c	15.4634	-0.159595	0.0783133	-2.0379	0.0415596	0.552718
bc052040	2.69541	-0.402481	0.197564	-2.03722	0.0416282	0.552718
aplp1	143.075	0.0510145	0.0250013	2.04047	0.0413034	0.552718
ate1	15.232	0.154669	0.0758327	2.0396	0.0413897	0.552718
cend1	87.8983	-0.0659132	0.0323596	-2.0369	0.0416605	0.552718
rps26	126.354	0.0542678	0.0266006	2.0401	0.0413407	0.552718
selm	119.005	0.0559355	0.0274525	2.03754	0.0415963	0.552718
fam228b	1.16826	0.551146	0.26991	2.04196	0.0411552	0.552718
gdap10	1.02912	0.592696	0.290908	2.0374	0.04161	0.552718
son	122.243	-0.0557189	0.0273568	-2.03675	0.041675	0.552718
st8sia3	19.4294	0.137086	0.0672824	2.03747	0.0416033	0.552718
exosc1	17.8679	-0.148441	0.0726969	-2.04192	0.0411593	0.552718
nelfb	10.2753	-0.196332	0.0965957	-2.03251	0.0421018	0.557006
shroom2	33.5293	-0.107198	0.0527742	-2.03126	0.0422283	0.557006
kif5a	56.0949	0.0807984	0.0397816	2.03105	0.0422501	0.557006
6430573f11rik	4.04037	-0.318093	0.15659	-2.03137	0.0422175	0.557006
zfyve21	4.31271	-0.30574	0.150524	-2.03117	0.042238	0.557006
wasl	20.0494	-0.138482	0.0682431	-2.02925	0.0424328	0.557914
dzip1l	4.44661	-0.300952	0.148334	-2.02888	0.0424703	0.557914
glrx	26.0367	-0.121566	0.0599082	-2.02921	0.0424367	0.557914
tmem8	1.38184	0.506713	0.249942	2.02732	0.0426298	0.559345
osbpl11	4.3393	0.283712	0.139984	2.02674	0.042689	0.559459
fam126b	20.9609	-0.135043	0.066705	-2.02448	0.042921	0.560027
cdk5r2	51.2935	0.0842823	0.0416211	2.02499	0.0428681	0.560027
hcn3	5.93912	0.244514	0.120756	2.02486	0.0428819	0.560027
nlk	11.0069	0.179885	0.0888609	2.02434	0.0429349	0.560027
fam220a	51.8011	0.0836113	0.0413337	2.02284	0.0430901	0.561168
ifitm10	4.43188	-0.418674	0.207007	-2.02251	0.0431238	0.561168
ufsp2	8.78664	-0.210773	0.104374	-2.0194	0.0434462	0.564134
tmem39a	1.76012	0.447559	0.221638	2.01932	0.0434537	0.564134
lancl2	23.8364	0.123254	0.0610836	2.0178	0.0436121	0.565525
ccdc149	3.13362	0.342534	0.169995	2.01496	0.0439084	0.568036
cadm4	35.1353	-0.103397	0.0513106	-2.01513	0.0438915	0.568036
klhl32	15.7222	0.150149	0.0746269	2.01199	0.0442209	0.570908
kcnmb4os2	4.63843	0.274248	0.136315	2.01187	0.0442336	0.570908
march1	49.251	-0.0867938	0.0431783	-2.01013	0.0444178	0.572617
sec14l1	16.0551	-0.154141	0.0767027	-2.00959	0.0444741	0.572675
fkbp9	4.13402	-0.309377	0.154082	-2.00787	0.0446566	0.573647
gabrg3	10.149	-0.195601	0.0974035	-2.00815	0.0446275	0.573647
dixdc1	33.3159	-0.105645	0.0526399	-2.00693	0.044757	0.573647
mxra7	1.88709	0.429345	0.213879	2.00742	0.0447054	0.573647
mmd2	44.9128	-0.0908918	0.0453079	-2.00609	0.0448462	0.574125
h2afv	25.6297	-0.120969	0.0603336	-2.005	0.044963	0.574955
3110035e14rik	6.5431	0.230247	0.114951	2.00301	0.0451767	0.575691
gramd1a	21.7575	-0.130931	0.0653647	-2.00308	0.0451686	0.575691
usp10	7.77351	-0.221816	0.11074	-2.00304	0.045173	0.575691
noct	8.91577	0.196766	0.0983067	2.00155	0.0453326	0.576485
nrip2	1.64249	-0.523279	0.261503	-2.00104	0.0453881	0.576485
ppp1r1a	208.735	0.0414881	0.020734	2.00097	0.0453954	0.576485
akr1c19	5.71308	0.245872	0.122943	1.99989	0.0455116	0.577298
rps3	429.228	-0.0291555	0.0145827	-1.99932	0.0455735	0.577421
akirin1	22.1039	0.126156	0.0631364	1.99816	0.0456997	0.577846
irgq	14.9233	0.152705	0.0764272	1.99805	0.0457115	0.577846
raph1	42.9707	0.0905781	0.0454387	1.99341	0.0462161	0.582893
htr7	1.35816	0.50719	0.254397	1.9937	0.0461849	0.582893
snx13	6.36585	0.231767	0.116294	1.99293	0.0462691	0.582895
tmem205	10.3043	-0.191754	0.0962518	-1.99222	0.0463472	0.583216
nxf1	68.6654	-0.0728048	0.0365626	-1.99124	0.0464547	0.583904
pla2g12a	8.62521	0.200451	0.10072	1.99017	0.0465721	0.584053
9430015g10rik	2.40761	0.380046	0.19092	1.99061	0.0465239	0.584053
pithd1	12.5389	0.165856	0.0834023	1.98862	0.0467432	0.585534
scpep1	1.29775	-0.574061	0.288953	-1.9867	0.0469559	0.587533
rap2c	7.53532	0.213043	0.107354	1.98449	0.0472016	0.589941
gm8773	4.86956	0.262837	0.132599	1.98219	0.0474581	0.591338
plxna1	25.2563	0.117004	0.059032	1.98205	0.0474739	0.591338
bhlhe40	11.8572	-0.176241	0.0888797	-1.98291	0.047377	0.591338
cnot3	7.91197	0.206943	0.10453	1.97974	0.047733	0.593897
ddx54	11.2661	-0.181424	0.0916976	-1.9785	0.0478724	0.594048
hsp90b1	26.1679	-0.118156	0.0597409	-1.9778	0.0479513	0.594048
plxnc1	1.92203	0.418245	0.211478	1.97772	0.0479599	0.594048
brix1	7.23581	-0.228854	0.1157	-1.978	0.047929	0.594048
tbc1d7	9.16056	-0.201855	0.102136	-1.97633	0.0481177	0.595133
foxn2	2.14618	0.40126	0.203067	1.976	0.0481551	0.595133
tubg2	19.7103	0.132079	0.0668654	1.9753	0.048234	0.595442
slc6a17	21.4967	0.126369	0.0640268	1.97368	0.0484177	0.596597
abhd14b	6.6198	0.226689	0.114892	1.97305	0.0484894	0.596597
pja2	89.5743	0.0622666	0.0315521	1.97346	0.0484435	0.596597
adsl	4.07554	-0.304582	0.15446	-1.97191	0.0486195	0.597533
ntrk3	23.0236	0.121801	0.0617896	1.97122	0.0486984	0.597639
cdc37	22.3112	0.123878	0.0628816	1.97002	0.0488359	0.597639
arpp21	215.776	-0.0404651	0.0205461	-1.96948	0.0488982	0.597639
nsf	53.9797	-0.0813965	0.0413035	-1.97069	0.0487588	0.597639
eif3h	117.163	-0.0551701	0.0280072	-1.96985	0.0488551	0.597639
scp2	26.7129	-0.115893	0.0588644	-1.96882	0.0489739	0.597903
rp23-366o14.4	2.87552	0.347317	0.17654	1.96736	0.0491416	0.599289
erp29	76.2515	0.0673148	0.0342337	1.96633	0.0492606	0.600078
slc32a1	12.3131	-0.172991	0.0880257	-1.96523	0.0493879	0.600633
susd5	2.15226	0.398999	0.203054	1.965	0.0494147	0.600633	Septa	YES
mfsd4	18.7932	-0.138025	0.0703454	-1.96211	0.0497501	0.602723
eif4ebp1	2.42271	0.374894	0.191	1.9628	0.0496695	0.602723
edil3	18.9918	0.133638	0.0681014	1.96233	0.0497237	0.602723
cnr1	22.4569	0.12319	0.0628957	1.95863	0.050156	0.606975
prdx6	46.8699	-0.0865897	0.0442456	-1.95702	0.0503447	0.607011
rpl22l1	257.811	0.0365295	0.0186617	1.95746	0.0502939	0.607011
gm11837	3.22419	0.328485	0.167806	1.95753	0.0502852	0.607011
d930016d06rik	5.15751	-0.268642	0.137291	-1.95674	0.0503784	0.607011
c530050e15rik	1.18934	-0.600619	0.307101	-1.95577	0.0504922	0.60772
gprasp1	31.0971	0.10414	0.0533212	1.95307	0.0508115	0.60773
ccdc92	18.9576	-0.137368	0.0703546	-1.95251	0.0508776	0.60773
nip7	13.6848	0.155822	0.0797973	1.95273	0.0508518	0.60773
ulk3	1.53119	-0.530491	0.27142	-1.9545	0.0506418	0.60773
kat7	8.19142	0.200482	0.102621	1.95362	0.0507464	0.60773
rab24	33.7122	-0.102557	0.0524557	-1.95512	0.0505687	0.60773
zbed3	14.4147	-0.157421	0.0806015	-1.95308	0.0508102	0.60773	Hollow	YES
st6gal2	19.6591	0.130719	0.0670093	1.95076	0.0510859	0.609559
hjurp	8.20862	-0.21046	0.107941	-1.94977	0.0512037	0.609649
ak5	7.92514	0.204375	0.104808	1.94999	0.0511772	0.609649
immp2l	1.92327	-0.463995	0.238036	-1.94927	0.0512634	0.609704
plagl1	2.62944	0.357268	0.18343	1.94771	0.0514494	0.611259
mpped2	72.6234	-0.0691675	0.0355468	-1.94582	0.0516767	0.612413
rpa3	3.52525	-0.324312	0.166758	-1.94481	0.0517977	0.612413
eif4a2	269.581	-0.0357392	0.0183787	-1.9446	0.0518234	0.612413
sst	29.1094	0.384669	0.197636	1.94635	0.0516123	0.612413
nr3c1	14.7556	-0.155651	0.0800052	-1.94552	0.0517129	0.612413
hpcal4	5.93927	0.234111	0.120511	1.94264	0.0520591	0.61258
lrrtm3	11.1026	0.172236	0.0886339	1.94322	0.0519891	0.61258
siva1	9.7686	0.183579	0.0944734	1.94318	0.0519942	0.61258
stk19	28.2208	0.108695	0.0559423	1.94298	0.0520188	0.61258
col8a1	3.75767	0.330429	0.170185	1.94158	0.0521876	0.61344
pex5l	18.3728	0.13374	0.0689802	1.93881	0.0525244	0.616744
adamtsl1	2.42748	0.373291	0.1927	1.93716	0.0527252	0.617521
chst12	3.10495	0.320594	0.165519	1.9369	0.0527581	0.617521
ctage5	6.1528	0.22926	0.118358	1.937	0.0527458	0.617521
grb2	30.2	-0.107298	0.0554226	-1.936	0.0528675	0.617966
btrc	8.3531	0.197175	0.101864	1.93567	0.0529079	0.617966
bdnf	1.89888	0.430217	0.222389	1.93453	0.0530485	0.618955
epm2a	3.04161	0.33053	0.170979	1.93316	0.0532168	0.619972
mettl2	7.34473	0.210404	0.108854	1.93291	0.0532477	0.619972
mmgt1	6.45554	0.222795	0.115345	1.93155	0.0534154	0.62127
pecr	1.0538	-0.626664	0.325623	-1.92451	0.054291	0.622204
camk1d	15.1525	0.146911	0.0761358	1.92959	0.0536571	0.622204
nup35	3.14971	0.316058	0.164361	1.92295	0.0544861	0.622204
cry2	17.6614	0.136013	0.0706946	1.92395	0.0543604	0.622204
rcn1	4.30442	0.271497	0.141194	1.92286	0.0544975	0.622204
ddx27	10.2322	-0.186076	0.0964072	-1.93011	0.0535936	0.622204
zbtb33	4.01926	0.28088	0.145678	1.92809	0.0538435	0.622204
kdm3a	2.03555	0.399602	0.207869	1.92237	0.0545592	0.622204
ptpro	11.7842	0.165938	0.0861489	1.92618	0.0540822	0.622204
bcat1	5.85721	-0.247894	0.128506	-1.92904	0.0537255	0.622204
plat	2.25279	-0.41735	0.216459	-1.92808	0.0538458	0.622204
prosc	10.7369	-0.179787	0.0935256	-1.92232	0.0545651	0.622204
ppif	5.50313	-0.257812	0.133833	-1.92636	0.0540593	0.622204
zbtb44	4.77813	0.257766	0.133623	1.92905	0.0537246	0.622204
arih2	6.26361	-0.236919	0.123332	-1.92099	0.0547333	0.622204
2310033p09rik	9.85898	-0.18881	0.0980854	-1.92495	0.0542351	0.622204
faap100	12.0507	0.164128	0.0852738	1.92472	0.0542649	0.622204
nop16	12.2883	-0.168007	0.0874116	-1.92202	0.0546036	0.622204
tspan17	32.0234	0.101264	0.0526685	1.92268	0.0545207	0.622204
syndig1l	9.77025	-0.188444	0.0980903	-1.92112	0.054716	0.622204
nit2	3.92711	0.28503	0.14832	1.92173	0.0546403	0.622204
dazl	1.22996	0.507459	0.263764	1.92391	0.0543653	0.622204
gpsm2	1.40557	-0.53672	0.279483	-1.9204	0.0548071	0.622403
ncoa7	28.0054	0.107662	0.0561198	1.91844	0.0550555	0.624583
ppp1r16b	14.5976	-0.152512	0.0795352	-1.91753	0.05517	0.625241
plekho1	10.1097	-0.185506	0.0967705	-1.91697	0.0552413	0.625243
cdkn2d	57.7062	0.0752998	0.0392873	1.91664	0.0552832	0.625243
hpca	53.9505	-0.0790617	0.0412597	-1.91619	0.0553403	0.625249
fndc4	63.115	0.0720513	0.0376169	1.9154	0.0554419	0.625259
tmtc1	5.51309	-0.254836	0.133054	-1.91529	0.0554559	0.625259
arf3	59.2681	0.0741854	0.038742	1.91486	0.0555107	0.625259
sptlc2	11.1183	-0.176644	0.0923154	-1.91349	0.0556856	0.626591
tapt1	3.83919	-0.305481	0.159693	-1.91293	0.0557569	0.626755
st6galnac5	9.00723	0.188016	0.098385	1.91103	0.0560013	0.626841
cyb5b	12.4702	0.160428	0.0839837	1.91022	0.0561046	0.626841
c2cd2l	10.0599	0.177898	0.0930418	1.91202	0.0558732	0.626841
tmem25	5.96268	-0.243183	0.127211	-1.91165	0.0559211	0.626841
pdcd7	4.30008	-0.287882	0.150691	-1.91041	0.0560804	0.626841
trabd	4.34247	-0.285656	0.1495	-1.91074	0.0560377	0.626841
mrfap1	224.794	0.0381747	0.0199965	1.90907	0.0562532	0.627868
lxn	18.4668	-0.134978	0.0707461	-1.90792	0.056402	0.628261
tk2	11.8199	0.163687	0.0857843	1.90813	0.0563748	0.628261
rnf208	58.1527	0.0746775	0.0391785	1.90609	0.0566391	0.629215
fras1	4.42945	0.265868	0.139458	1.90643	0.056594	0.629215
robo2	55.0654	0.0766899	0.0402373	1.90594	0.0566584	0.629215
arl5a	12.2023	0.1616	0.0848304	1.90498	0.0567827	0.629964
tmem128	15.3193	-0.149441	0.0784924	-1.90389	0.0569244	0.630271
me3	3.22713	-0.352785	0.185272	-1.90414	0.0568916	0.630271
psen2	2.60305	0.351485	0.184925	1.90069	0.0573423	0.630882
astn2	1.25826	-0.570619	0.300121	-1.9013	0.0572631	0.630882	Hollow
lhpp	4.38346	0.266062	0.140034	1.89998	0.0574359	0.630882
myo16	23.0989	-0.120888	0.0635441	-1.90242	0.0571164	0.630882
2010320m18rik	18.5832	-0.135093	0.0710751	-1.90071	0.0573398	0.630882
zfp317	3.33782	0.314234	0.165368	1.90021	0.0574059	0.630882
max	35.5171	-0.0972505	0.0511196	-1.90241	0.0571173	0.630882
nell2	32.0102	0.100152	0.0526558	1.90202	0.0571686	0.630882
hdgfrp3	52.3473	0.0784487	0.0412992	1.89952	0.0574961	0.630917
tpp2	16.1626	-0.144651	0.0762222	-1.89776	0.0577282	0.631385
tbcd	4.70277	-0.272024	0.143284	-1.89849	0.057631	0.631385
zfp523	8.36167	0.19278	0.10156	1.89819	0.0576713	0.631385
abhd3	3.43428	-0.32056	0.16898	-1.89703	0.0578241	0.631385
drap1	50.5789	-0.0811865	0.0427883	-1.8974	0.0577754	0.631385
6330403a02rik	4.13003	0.273752	0.144397	1.89582	0.0579838	0.631445
mcmbp	7.57584	0.202673	0.106913	1.89569	0.0580009	0.631445
got2	23.6524	0.116194	0.0612911	1.89578	0.0579894	0.631445
dnajc12	1.40136	0.472961	0.249789	1.89344	0.0582992	0.633546
ralgapa1	14.0264	0.149789	0.0791125	1.89337	0.0583085	0.633546
cdc26	45.8052	0.0832117	0.0440143	1.89056	0.0586827	0.63619
pold3	4.45324	0.262433	0.138867	1.88982	0.0587819	0.63619
ift88	4.18147	-0.289357	0.153106	-1.88992	0.0587693	0.63619
amt	2.3292	0.367998	0.194648	1.89058	0.0586798	0.63619
vcam1	4.97703	-0.297269	0.157545	-1.88688	0.059176	0.636718
cnpy2	29.4075	-0.1061	0.0561973	-1.88799	0.0590269	0.636718
sin3b	26.0517	0.109749	0.058164	1.88689	0.059175	0.636718
tmem30a	35.6715	0.0938767	0.0497248	1.88792	0.0590362	0.636718
mdga2	13.8439	0.150404	0.0796506	1.8883	0.0589853	0.636718
rhebl1	7.81401	0.199613	0.105751	1.88757	0.0590836	0.636718
scn3a	45.5344	0.0832854	0.0442112	1.88381	0.0595913	0.636849
nsfl1c	19.7147	-0.129898	0.0689175	-1.88484	0.0594518	0.636849
ank2	160.655	0.0445143	0.0236276	1.88399	0.0595661	0.636849
rint1	5.27001	-0.255253	0.135379	-1.88547	0.059367	0.636849
rfx1	1.49268	-0.5085	0.269829	-1.88453	0.0594937	0.636849
lrrk2	1.147	-0.618462	0.327898	-1.88614	0.0592757	0.636849
mydgf	39.5431	-0.0914213	0.0484834	-1.88562	0.0593461	0.636849
polr3gl	14.7328	0.144975	0.0771272	1.87969	0.0601499	0.640318
1810037i17rik	72.8861	0.065734	0.0349782	1.87929	0.0602053	0.640318
atp6v1b2	39.3044	0.0893052	0.0475173	1.87943	0.0601864	0.640318
filip1	3.09534	0.322213	0.171453	1.87931	0.0602022	0.640318
asxl3	9.43528	0.180709	0.0961264	1.87991	0.0601201	0.640318
srm	32.0954	-0.101182	0.0538681	-1.87834	0.0603349	0.64108
zdhhc5	1.76935	0.416028	0.221907	1.87479	0.0608217	0.645632
tnks1bp1	4.42764	-0.273353	0.146039	-1.87177	0.0612379	0.646129
srxn1	8.39965	0.190536	0.101825	1.8712	0.0613173	0.646129
nipsnap3b	15.5751	0.140317	0.0749202	1.87288	0.0610846	0.646129
mkln1os	3.09576	0.310951	0.166129	1.87174	0.0612422	0.646129
sult2b1	4.38682	0.355076	0.189858	1.87022	0.0614527	0.646129
tcf3	4.57561	-0.272344	0.145432	-1.87265	0.061117	0.646129
gpc5	8.28646	0.191246	0.102174	1.87176	0.0612393	0.646129
lhfpl2	2.13591	-0.418341	0.223651	-1.8705	0.0614139	0.646129
arhgef28	5.33401	0.236667	0.12646	1.87148	0.0612783	0.646129
atl1	18.2993	0.130106	0.0695559	1.87052	0.0614116	0.646129
saysd1	12.1042	0.159167	0.0851271	1.86976	0.0615177	0.646199
dcaf17	10.7912	-0.173514	0.0929198	-1.86736	0.061852	0.649094
m5c1000i18rik	1.10043	0.533693	0.285875	1.86688	0.0619188	0.649179
nubp1	6.09337	0.222301	0.119161	1.86556	0.0621031	0.650494
aarsd1	3.02587	0.313111	0.167914	1.86471	0.0622222	0.651125
prox1os	1.60024	0.63764	0.342614	1.8611	0.0627294	0.652467
cep44	8.72535	-0.194225	0.104352	-1.86125	0.0627089	0.652467
ptprg	8.30223	0.190832	0.10255	1.86086	0.0627633	0.652467
gm11627	1.20162	-0.564083	0.302996	-1.86169	0.0626471	0.652467
mapk14	9.2968	-0.188376	0.101178	-1.86184	0.0626259	0.652467
kctd16	1.40862	0.49488	0.265804	1.86182	0.0626279	0.652467
rtn3	162.613	0.0438016	0.0235081	1.86326	0.0624263	0.652467
rps2	284.146	0.0331044	0.0178022	1.85957	0.0629466	0.653758
ndufa3	88.3286	-0.0598621	0.0322348	-1.85706	0.0633023	0.654992
cyth2	54.4858	-0.0763122	0.0410918	-1.85712	0.0632944	0.654992
lrrc20	1.91521	0.401618	0.216155	1.85801	0.063168	0.654992
poldip2	38.4532	-0.0909398	0.0489484	-1.85787	0.063187	0.654992
upf2	3.74601	0.278976	0.150295	1.85619	0.0634262	0.655049
lix1	9.10966	0.182717	0.0984188	1.85653	0.0633788	0.655049
akt3	17.4012	0.131817	0.0711143	1.8536	0.0637966	0.655545
mrpl33	94.6856	0.0570408	0.0307675	1.85393	0.0637489	0.655545
c2cd5	9.0656	-0.189263	0.102117	-1.85339	0.0638261	0.655545
ipo8	4.03821	0.269418	0.145399	1.85295	0.0638891	0.655545
tmem59l	29.0937	-0.104798	0.0565073	-1.8546	0.0636537	0.655545
jrkl	2.24538	0.368298	0.198633	1.85416	0.0637162	0.655545
txnl4a	35.5353	0.0926088	0.0499694	1.85331	0.0638378	0.655545
hmox2	19.048	0.125751	0.0678924	1.85221	0.0639961	0.656034
armcx3	28.0574	0.103761	0.0560741	1.85043	0.0642519	0.657599
serbp1	122.397	-0.050606	0.027356	-1.84991	0.0643271	0.657599
2010111i01rik	10.5011	-0.174652	0.0944069	-1.84999	0.0643151	0.657599
zbtb45	3.81637	-0.293666	0.159042	-1.84647	0.0648245	0.660559
rpl29	238.148	0.0359181	0.0194472	1.84696	0.0647536	0.660559
dlg4	24.8838	0.109953	0.0595177	1.84739	0.0646901	0.660559
atat1	41.8419	0.0850438	0.0460629	1.84625	0.0648556	0.660559
zfp68	8.25467	0.189693	0.102817	1.84496	0.0650432	0.661861
npdc1	168.234	-0.0429119	0.0232911	-1.84242	0.0654141	0.664413
ubap1	8.3994	-0.196454	0.106623	-1.8425	0.0654013	0.664413
kcnip4	11.5917	-0.165582	0.0899443	-1.84094	0.0656308	0.666002
s100a1	10.7862	-0.171529	0.0933554	-1.83738	0.0661541	0.668732
pomgnt1	8.29853	0.189362	0.103069	1.83723	0.066176	0.668732
kmt2a	13.2603	0.149297	0.0812293	1.83797	0.0660663	0.668732
zfp729b	2.93204	-0.347425	0.189	-1.83823	0.0660293	0.668732
ccdc184	23.8982	0.111854	0.0608875	1.83705	0.0662022	0.668732
socs6	7.27118	-0.210512	0.114652	-1.83609	0.0663445	0.669559
stx1b	22.771	0.114743	0.0625262	1.83511	0.066489	0.670406
slc7a1	12.8507	-0.157058	0.0856212	-1.83433	0.0666047	0.670508
dkkl1	13.8284	0.225875	0.123145	1.83423	0.0666204	0.670508
wbp5	87.2664	0.0587154	0.0320231	1.83353	0.0667233	0.670933
serinc3	16.4726	-0.137951	0.0752745	-1.83264	0.0668555	0.671095
gm14305	6.71713	0.208418	0.113727	1.83261	0.0668607	0.671095
arl6ip4	32.2107	0.0961072	0.052474	1.83152	0.0670232	0.671189
scoc	191.099	0.0396936	0.0216794	1.83094	0.0671102	0.671189
tmem55b	30.7039	-0.100703	0.0550014	-1.83092	0.0671129	0.671189
bak1	7.78744	-0.203184	0.110901	-1.83212	0.0669337	0.671189
d16ertd472e	1.90116	0.395673	0.216267	1.82956	0.067316	0.672613
myh7b	1.01474	-0.612658	0.334964	-1.82903	0.0673953	0.672798
gm14703	1.38676	-0.508901	0.279028	-1.82383	0.0681777	0.673699
dock7	29.579	-0.102259	0.0559874	-1.82646	0.0677804	0.673699
zmym4	11.318	0.159976	0.0876135	1.82592	0.0678618	0.673699
znhit1	58.4141	0.0713706	0.0391234	1.82424	0.0681152	0.673699
zfp316	2.36478	0.350943	0.192051	1.82734	0.0676482	0.673699
abhd2	18.3692	0.213212	0.116771	1.8259	0.0678648	0.673699
unc5d	39.308	-0.165997	0.0910221	-1.8237	0.0681974	0.673699
sorl1	7.28746	0.198246	0.108674	1.82422	0.0681181	0.673699	Septa
mlh1	2.15625	-0.403195	0.22115	-1.82317	0.0682774	0.673699
pank3	8.33046	0.186494	0.102275	1.82346	0.0682339	0.673699
erbb2ip	3.10634	-0.325504	0.178247	-1.82614	0.0678288	0.673699
fos	29.1671	-0.213737	0.117091	-1.82539	0.0679423	0.673699
bbip1	98.6898	0.0549785	0.0301072	1.82609	0.0678371	0.673699
stambpl1	4.01644	0.264714	0.14525	1.82248	0.0683828	0.674138
zfp335	2.53005	0.339597	0.186532	1.82058	0.0686713	0.675777
ndufb7	87.7765	-0.0590245	0.0324193	-1.82066	0.068659	0.675777
creg1	6.21951	-0.2263	0.124452	-1.81837	0.0690072	0.678479
tenm4	15.2074	0.137978	0.0760076	1.81532	0.0694751	0.682473
1700088e04rik	3.49575	0.283805	0.15638	1.81484	0.0695478	0.682581
dstyk	5.04032	0.236402	0.13038	1.81317	0.0698058	0.683359
haus2	7.42014	0.196079	0.10819	1.81235	0.0699324	0.683359
rp2	2.06288	-0.407866	0.225252	-1.81071	0.0701859	0.683359
unc13b	12.0925	0.153842	0.0849799	1.81033	0.0702449	0.683359
rnf11	36.3936	0.0895174	0.0493766	1.81295	0.0698393	0.683359
depdc5	3.99197	-0.281615	0.155425	-1.81191	0.07	0.683359
gm4876	1.05785	0.539482	0.297953	1.81063	0.070198	0.683359
pinx1	4.33124	0.254661	0.140498	1.81256	0.0699002	0.683359
fbxo9	57.6034	0.0712969	0.0393404	1.81231	0.0699384	0.683359
syngr1	30.6226	0.0973513	0.0537667	1.81062	0.0701991	0.683359
ctnnbip1	37.25	0.0884369	0.0488872	1.809	0.0704512	0.684162
mmd	132.458	0.0470152	0.0259886	1.80907	0.0704399	0.684162
cadm1	32.0775	0.0954731	0.0528074	1.80795	0.0706146	0.685065
map6d1	3.71773	0.273803	0.151473	1.8076	0.0706681	0.685065
trp53inp2	18.4284	0.125042	0.0692899	1.80462	0.0711341	0.685198
l1cam	60.5787	0.0692067	0.038347	1.80475	0.0711142	0.685198
acsl4	15.4996	-0.139991	0.0775062	-1.8062	0.0708878	0.685198
snrpd3	48.5725	-0.0787918	0.0436217	-1.80625	0.0708789	0.685198
nudt21	24.8161	0.107829	0.0597606	1.80434	0.0711773	0.685198
ncbp2	19.5132	0.121362	0.0672358	1.80502	0.0710722	0.685198
fech	7.412	0.195343	0.108141	1.80637	0.0708602	0.685198
adrb1	1.77296	0.404423	0.22399	1.80554	0.0709904	0.685198
zfp37	8.03795	-0.195997	0.108741	-1.80243	0.0714784	0.686901
ctdnep1	14.533	-0.144828	0.0803363	-1.80277	0.0714241	0.686901
cfl2	91.955	0.0561529	0.0312083	1.7993	0.0719719	0.689682
2410089e03rik	11.5958	0.156367	0.0868781	1.79984	0.0718861	0.689682
tst	13.8132	-0.148459	0.0825229	-1.79901	0.0720173	0.689682
h2-dma	2.93179	0.316922	0.17611	1.79957	0.0719278	0.689682
grrp1	1.96253	0.382868	0.212878	1.79853	0.0720933	0.689813
grm7	25.7352	0.105198	0.0585042	1.79813	0.0721559	0.689815
vti1b	73.2494	0.0627703	0.0349954	1.79367	0.0728654	0.695396
foxred2	4.70307	-0.257904	0.143769	-1.79387	0.0728335	0.695396
pou3f3	32.9137	-0.0946079	0.0528025	-1.79173	0.073176	0.695967
emc4	69.3601	-0.0651414	0.0363602	-1.79156	0.0732036	0.695967
gm14419	3.30416	0.288086	0.160776	1.79185	0.0731574	0.695967
ppp1r35	11.6006	-0.160696	0.0896985	-1.79151	0.0732119	0.695967
2310011j03rik	15.1181	-0.140585	0.0784805	-1.79133	0.0732399	0.695967
lrp6	4.96407	0.234861	0.13117	1.79051	0.0733716	0.696621
fam179b	4.561	-0.259934	0.145229	-1.78981	0.0734839	0.697089
zfp28	2.62086	0.338779	0.189324	1.78942	0.0735473	0.697092
abracl	32.1406	-0.0959221	0.0536273	-1.78868	0.073666	0.697619
2810405f17rik	1.1288	-0.563466	0.315311	-1.78702	0.0739348	0.697776
sept11	23.7376	0.109148	0.0610512	1.78781	0.0738074	0.697776
rps24	390.116	0.0271707	0.0151998	1.78757	0.0738455	0.697776
dlat	13.8817	-0.146883	0.0821823	-1.78728	0.0738925	0.697776
zfp141	1.41562	0.443617	0.248421	1.78575	0.0741405	0.69912
mycbp	7.90217	-0.19521	0.109402	-1.78434	0.0743687	0.699926
pdik1l	6.97271	0.199172	0.111666	1.78364	0.0744825	0.699926
tfam	9.94078	-0.174423	0.0978323	-1.78288	0.0746056	0.699926
kcnc2	4.44418	-0.284625	0.159633	-1.783	0.0745865	0.699926
pdcd2	6.43056	-0.218451	0.122435	-1.78422	0.0743875	0.699926
gm27217	1.26709	0.467873	0.262383	1.78317	0.0745587	0.699926
napa	36.9035	0.0873861	0.04906	1.78121	0.0748787	0.701892
pomk	5.52537	-0.236688	0.132916	-1.78073	0.0749565	0.701928
rad51ap2	4.99962	-0.247597	0.139067	-1.78041	0.0750094	0.701928
sec62	112.324	-0.0507402	0.028549	-1.7773	0.0755186	0.703612
sox2	6.72274	-0.212478	0.119591	-1.7767	0.0756179	0.703612
ap1s1	53.3456	0.0727252	0.0409312	1.77676	0.0756071	0.703612
rps5	484.524	-0.024381	0.0137161	-1.77754	0.0754787	0.703612
nrcam	22.363	0.111424	0.0627176	1.7766	0.0756346	0.703612
kcnv1	8.07064	0.185654	0.104378	1.77867	0.0752945	0.703612
rcan2	15.3417	-0.139458	0.0784724	-1.77716	0.0755415	0.703612
lclat1	5.15798	-0.243561	0.137149	-1.77589	0.0757509	0.704101
maoa	8.74246	0.17676	0.099715	1.77265	0.0762861	0.7067
c130026l21rik	5.02512	0.233474	0.13169	1.77291	0.076244	0.7067
zcchc6	7.48065	0.191332	0.107902	1.7732	0.0761949	0.7067
spsb3	27.1579	-0.103557	0.058386	-1.77366	0.0761193	0.7067
fam126a	9.55808	0.169158	0.0954894	1.77148	0.0764805	0.707317
cacnb3	33.784	0.0909965	0.051357	1.77184	0.0764204	0.707317
e130012a19rik	6.46365	-0.214996	0.121422	-1.77065	0.0766193	0.708009
camk1	53.8988	0.071856	0.0406021	1.76976	0.0767669	0.708189
hook3	11.5697	-0.159371	0.0900369	-1.77006	0.0767163	0.708189
crls1	4.69261	0.23944	0.135634	1.76533	0.0775076	0.709057
gm14418	8.05781	0.183177	0.103685	1.76667	0.0772831	0.709057
vamp3	7.23871	-0.202358	0.11463	-1.76532	0.0775096	0.709057
kdm2b	18.3272	0.122615	0.0694711	1.76499	0.0775661	0.709057
ap2s1	89.538	0.055947	0.0316562	1.76733	0.0771727	0.709057
fabp3-ps1	2.49229	-0.36333	0.205492	-1.7681	0.0770436	0.709057
dnaja4	4.48661	-0.259454	0.14674	-1.76812	0.0770404	0.709057
gabarap	150.76	0.0430506	0.0243841	1.76552	0.0774761	0.709057
wrnip1	8.09814	0.183249	0.103783	1.7657	0.0774469	0.709057
kdm3b	4.23627	0.250683	0.141869	1.767	0.0772285	0.709057
a730017c20rik	19.668	0.11864	0.0671245	1.76746	0.0771512	0.709057
pcdh8	3.96889	0.258904	0.146907	1.76237	0.0780065	0.712494
ftsj2	1.6638	0.407391	0.231447	1.76019	0.0783748	0.713664
ccdc66	2.42785	-0.367891	0.208932	-1.76082	0.0782692	0.713664
krt10	42.8801	-0.0816928	0.046414	-1.76009	0.0783927	0.713664
wdr37	7.44262	-0.198579	0.112761	-1.76107	0.0782273	0.713664
phyhipl	32.9662	-0.0931345	0.0529343	-1.75944	0.0785035	0.714085
ptrh1	1.18304	0.474436	0.26973	1.75893	0.0785892	0.714107
piezo1	1.25676	0.464593	0.264311	1.75776	0.078789	0.714107
nr1d2	9.07764	-0.179799	0.102246	-1.75851	0.0786615	0.714107
coro2b	16.1248	-0.133299	0.0758198	-1.7581	0.0787298	0.714107
dynll2	138.012	0.0448041	0.0254927	1.75752	0.0788287	0.714107
sgk3	3.77952	-0.293893	0.167391	-1.75573	0.0791349	0.716294
rbmx2	11.3039	0.154807	0.0882401	1.75438	0.0793648	0.717787
phtf1os	1.27218	0.459228	0.261925	1.75328	0.0795533	0.718355
tmem229b	19.6025	-0.120876	0.0689433	-1.75326	0.0795575	0.718355
mospd2	3.63928	-0.285615	0.163119	-1.75096	0.0799521	0.7184
rab28	13.2226	0.142543	0.0813867	1.75143	0.0798711	0.7184
mier2	4.75868	0.236315	0.134852	1.7524	0.0797056	0.7184
gpbp1	48.0546	-0.0765691	0.0437254	-1.75113	0.0799229	0.7184
adamts5	1.23391	-0.522473	0.298386	-1.751	0.0799466	0.7184
fam13b	5.58597	0.217387	0.124032	1.75267	0.0796589	0.7184
smc5	13.8414	-0.144325	0.0825335	-1.74869	0.0803447	0.721342
c920006o11rik	2.6743	0.318302	0.18207	1.74823	0.0804235	0.721464
tm6sf1	4.19561	0.24996	0.143079	1.747	0.0806374	0.722796
gm17586	8.18923	0.1798	0.102949	1.74649	0.0807253	0.722998
zfp451	21.7348	-0.113558	0.0654443	-1.73518	0.0827081	0.724207
tmem169	7.18901	-0.200098	0.11546	-1.73305	0.0830868	0.724207
arrdc1	6.60433	0.199733	0.11491	1.73817	0.0821801	0.724207
b3galt1	19.9152	-0.118576	0.0682496	-1.73739	0.0823185	0.724207
frmd5	6.77164	-0.206198	0.118393	-1.74165	0.0815695	0.724207
cask	36.8693	0.0850946	0.0490666	1.73427	0.0828708	0.724207
igsf3	22.5567	0.108745	0.0626195	1.7366	0.0824586	0.724207
jakmip1	36.4848	0.0857727	0.0492735	1.74075	0.0817276	0.724207
st8sia2	11.0365	0.154163	0.0888529	1.73504	0.0827338	0.724207
hbb-bs	2.88693	-1.11104	0.641008	-1.73327	0.083048	0.724207
1500026h17rik	14.5343	-0.139389	0.0802524	-1.73688	0.0824083	0.724207
tmcc3	1.68207	-0.434506	0.250016	-1.73791	0.0822267	0.724207
csmd1	26.6914	-0.101959	0.0587127	-1.73657	0.0824633	0.724207
nr3c2	1.40166	0.435978	0.251063	1.73653	0.0824705	0.724207
maf	12.9731	-0.24383	0.139924	-1.74259	0.0814047	0.724207
angptl6	6.43714	0.200779	0.115538	1.73777	0.0822505	0.724207
anp32a	54.561	-0.0715729	0.0411359	-1.73991	0.0818743	0.724207
slc35e4	10.7569	0.156318	0.090217	1.73268	0.0831519	0.724207
urgcp	4.27708	0.246414	0.141605	1.74014	0.0818337	0.724207
dcaf7	28.8697	-0.0988481	0.0567111	-1.74301	0.0813318	0.724207
cygb	6.55031	-0.209226	0.12003	-1.74312	0.0813122	0.724207
asb13	7.0413	-0.203522	0.116685	-1.7442	0.0811238	0.724207
d130043k22rik	1.4537	0.428766	0.245756	1.74468	0.0810411	0.724207
gmpr	5.60937	-0.226739	0.130846	-1.73287	0.0831192	0.724207
sptssa	86.7443	0.0560015	0.0321478	1.742	0.0815083	0.724207
sepp1	6.22512	-0.215515	0.123504	-1.74501	0.0809835	0.724207
cdh6	2.3723	-0.366206	0.211251	-1.73351	0.0830048	0.724207
mapk15	1.37152	0.44268	0.253996	1.74286	0.0813572	0.724207
c1qtnf6	2.91769	0.304831	0.175716	1.73479	0.0827783	0.724207
cox14	117.706	-0.0483086	0.0278723	-1.73321	0.0830579	0.724207
acap2	8.47786	-0.183685	0.105748	-1.737	0.0823873	0.724207
tapbp	1.34562	0.446386	0.257539	1.73328	0.0830467	0.724207
gm10269	6.7742	0.197412	0.113558	1.73842	0.0821366	0.724207
2900055j20rik	216.231	-0.0356717	0.0205337	-1.73722	0.0823478	0.724207
cdo1	12.5249	0.145229	0.0836903	1.73531	0.0826859	0.724207
arhgef1	6.9423	-0.203879	0.117705	-1.73211	0.0832533	0.72452
plppr4	59.994	0.0667242	0.0385436	1.73114	0.0834275	0.724895
dab1	28.9884	0.0956596	0.0552514	1.73135	0.0833893	0.724895
snap25	173.166	0.0394382	0.0227963	1.73003	0.0836254	0.725016
fam210b	3.05144	-0.318802	0.184228	-1.73048	0.0835454	0.725016
jak2	3.08535	0.287313	0.166081	1.72996	0.0836381	0.725016
stk25	56.5727	0.0683711	0.0397284	1.72096	0.0852577	0.725337
gpr161	3.07997	0.291877	0.169649	1.72047	0.0853462	0.725337
cnih3	37.2049	0.0846309	0.0490041	1.72702	0.0841648	0.725337	Hollow
ccdc148	6.32306	0.20185	0.11722	1.72197	0.0850741	0.725337
eif2ak4	2.5995	0.316966	0.184091	1.72179	0.0851076	0.725337
raly	53.2246	-0.071716	0.041578	-1.72486	0.0845535	0.725337
pkig	85.8145	0.0556412	0.0323117	1.72202	0.0850668	0.725337
ssx2ip	35.4124	0.0865148	0.0500632	1.72811	0.0839681	0.725337
eps15	19.3299	0.116154	0.0674801	1.72131	0.0851945	0.725337
gnl2	13.0788	-0.14605	0.0847579	-1.72315	0.0848621	0.725337
ago3	4.53681	-0.25183	0.145845	-1.7267	0.0842217	0.725337
ppp1cc	48.0321	-0.0755448	0.0437932	-1.72503	0.0845214	0.725337
atp6v0a2	3.25019	-0.298718	0.173007	-1.72663	0.0842345	0.725337
1700003e16rik	3.78056	0.26104	0.151278	1.72556	0.084426	0.725337
faap24	4.20647	0.245593	0.142223	1.72682	0.0842006	0.725337
trim3	13.2936	-0.144735	0.0839637	-1.72378	0.084748	0.725337
ipmk	7.90586	-0.189154	0.109637	-1.72527	0.084479	0.725337
tbc1d15	3.64441	-0.283119	0.164441	-1.7217	0.085123	0.725337
tenm3	19.4793	-0.118553	0.0689025	-1.7206	0.0853239	0.725337
gcdh	3.30971	-0.297435	0.172657	-1.72269	0.0849445	0.725337
itfg1	45.9053	0.0760151	0.0439835	1.72826	0.0839409	0.725337
ykt6	41.69	0.0795968	0.0462079	1.72258	0.0849646	0.725337
zfp2	7.50186	0.185598	0.107445	1.72737	0.0841016	0.725337
trib2	9.41262	0.165641	0.0962868	1.72029	0.0853801	0.725337
arg2	4.14894	-0.261734	0.151575	-1.72676	0.0842109	0.725337
ncam2	9.84036	0.163132	0.0945732	1.72493	0.0845401	0.725337
lgr4	4.41167	0.240527	0.139853	1.71986	0.085458	0.725442
fstl1	9.98357	-0.166939	0.0970865	-1.71949	0.0855248	0.725453
ppp1r3d	1.31629	0.446204	0.259707	1.71811	0.085777	0.726067
prkar1b	56.8334	0.0680245	0.0396031	1.71765	0.0858599	0.726067
clu	22.624	-0.109849	0.0639455	-1.71785	0.0858235	0.726067
map2k3	2.15448	0.349579	0.203475	1.71805	0.0857883	0.726067
zfp335os	3.54466	0.26771	0.155896	1.71723	0.0859363	0.726158
zik1	3.03093	0.299194	0.174278	1.71676	0.0860224	0.726331
med4	14.9157	0.131997	0.07692	1.71603	0.0861573	0.726915
gm6710	24.1092	0.104236	0.0607948	1.71455	0.0864271	0.727597
trit1	5.48062	-0.225748	0.131669	-1.71451	0.0864355	0.727597
copz1	26.0954	0.0997579	0.0581689	1.71497	0.0863505	0.727597
chtf8	4.66501	0.232034	0.135439	1.7132	0.0866763	0.72907
vwc2l	1.55839	0.407293	0.237923	1.71187	0.0869208	0.73057
1700020i14rik	78.8356	-0.0584138	0.0341349	-1.71126	0.0870326	0.730955
gfpt1	13.5243	-0.142673	0.0834028	-1.71065	0.087146	0.731352
vat1	4.64048	0.232001	0.135709	1.70955	0.0873492	0.732502
cbr4	2.09456	-0.379771	0.222298	-1.70838	0.0875652	0.733201
ttll1	10.446	0.156241	0.0914522	1.70845	0.087553	0.733201
zbtb8a	3.46571	-0.287774	0.168543	-1.70742	0.0877432	0.73385
ddx5	113.03	-0.048532	0.028427	-1.70725	0.0877754	0.73385
tnc	2.4474	-0.351699	0.206046	-1.70689	0.0878418	0.733851
adamts17	2.17905	0.35184	0.206201	1.7063	0.0879528	0.734075
ttc3	294.724	0.0297932	0.0174634	1.70604	0.0880014	0.734075
commd2	23.2734	0.105304	0.0617816	1.70446	0.0882956	0.734866
fnip1	8.83006	0.169333	0.0993288	1.70477	0.0882377	0.734866
snx15	12.856	0.140436	0.0823857	1.70462	0.0882651	0.734866
crk	25.9203	0.099331	0.0583934	1.70107	0.0889307	0.739596
gdpd5	3.91161	0.25289	0.148703	1.70064	0.0890105	0.739703
atg7	4.13238	0.24436	0.143783	1.6995	0.0892248	0.740262
slc25a17	20.7948	0.110875	0.0652299	1.69976	0.0891766	0.740262
coro1b	13.6058	-0.140888	0.0829137	-1.69922	0.0892785	0.740262
sdf4	31.5918	-0.091979	0.0541905	-1.69733	0.0896346	0.740939
abcb9	5.4215	-0.224733	0.132414	-1.6972	0.0896594	0.740939
sdhd	51.2942	-0.0719305	0.0423588	-1.69813	0.0894841	0.740939
hcn1	14.9828	-0.133771	0.0787977	-1.69765	0.0895737	0.740939
d17h6s53e	4.09145	-0.478493	0.281963	-1.69701	0.0896951	0.740939
plppr1	49.931	-0.0728068	0.0429141	-1.69657	0.0897776	0.741067
nde1	1.59701	-0.434305	0.256051	-1.69617	0.0898535	0.741141
ndrg1	5.29832	0.218363	0.128786	1.69555	0.0899705	0.741553
zbtb14	5.03517	-0.234796	0.138516	-1.69508	0.0900606	0.741743
nipa1	9.01125	0.167089	0.0986025	1.69457	0.0901573	0.741987
nol7	72.7894	-0.0601842	0.0355463	-1.69312	0.0904322	0.743696
polr3k	49.5063	0.0717136	0.0423973	1.69147	0.0907478	0.74473
gne	3.51583	-0.281594	0.166486	-1.6914	0.09076	0.74473
b230307c23rik	2.95557	-0.31559	0.186524	-1.69195	0.0906552	0.74473
usp38	3.39968	0.278153	0.164585	1.69002	0.0910236	0.746339
b230369f24rik	1.24901	0.449062	0.266658	1.68404	0.0921747	0.746587
otud1	1.7648	0.375279	0.222949	1.68325	0.0923267	0.746587
cdk9	9.43242	-0.168201	0.0998847	-1.68395	0.092192	0.746587
pla2g4d	1.91178	-0.411872	0.244335	-1.68569	0.0918564	0.746587
zgpat	2.65943	-0.335056	0.198894	-1.6846	0.0920656	0.746587
ccdc120	2.77351	0.296444	0.176086	1.68352	0.0922744	0.746587
impad1	39.2549	0.0800223	0.047514	1.68418	0.0921465	0.746587
raver2	2.15762	-0.375043	0.222258	-1.68742	0.0915233	0.746587
agfg2	6.59684	-0.203078	0.120596	-1.68395	0.0921908	0.746587
zfp628	3.3415	0.268153	0.159211	1.68426	0.0921306	0.746587
cox4i1	543.402	-0.021825	0.0129407	-1.68654	0.0916928	0.746587
gm3488	1.211	0.452292	0.26871	1.6832	0.0923362	0.746587
zbtb16	2.78003	0.305459	0.181105	1.68664	0.091673	0.746587
mllt6	4.13001	-0.257351	0.152411	-1.68853	0.0913099	0.746587
enthd2	3.66048	-0.275843	0.163614	-1.68594	0.0918074	0.746587
pxdc1	6.52014	0.194518	0.115167	1.68902	0.0912161	0.746587
5031439g07rik	12.3576	0.142098	0.0841343	1.68894	0.0912312	0.746587
tfcp2	2.60539	0.316021	0.187375	1.68657	0.0916855	0.746587
ankrd13d	13.2409	0.137403	0.0814418	1.68714	0.0915771	0.746587
pamr1	3.14748	-0.305642	0.181656	-1.68253	0.0924652	0.74692	Hollow	YES
gjd2	5.01136	0.221066	0.131408	1.68229	0.0925124	0.74692
pnkd	54.1167	-0.0691262	0.0411357	-1.68044	0.0928715	0.748486
zbtb10	2.0351	0.352077	0.209525	1.68036	0.0928881	0.748486
b4galt2	29.8047	0.0915567	0.0545013	1.6799	0.0929772	0.748486
stac2	1.40549	-0.465524	0.277067	-1.68019	0.0929208	0.748486
smndc1	11.1641	-0.15396	0.0916919	-1.6791	0.0931325	0.749192
pip5k1a	11.4019	0.147097	0.087667	1.6779	0.0933662	0.749437
ahcyl2	10.2597	0.154792	0.0922381	1.67818	0.0933115	0.749437
ube2d1	88.1282	0.0534768	0.0318689	1.67803	0.093342	0.749437
rnd3	8.18855	-0.180475	0.107583	-1.67754	0.093437	0.749461
hip1r	6.8201	0.189336	0.112924	1.67667	0.0936079	0.750288
2610002m06rik	11.0537	0.149553	0.0892381	1.67589	0.09376	0.750448
synj2bp	13.7244	-0.13831	0.0825301	-1.67587	0.0937636	0.750448
adgrb3	61.1061	0.0639069	0.0381628	1.67459	0.0940156	0.751859
klf5	7.03791	-0.193217	0.115403	-1.67428	0.0940759	0.751859
cggbp1	25.8604	0.0980624	0.0585824	1.67392	0.0941454	0.751872
agfg1	14.5614	0.130149	0.077823	1.67237	0.0944512	0.753419
zcchc17	82.6981	0.0549424	0.0328587	1.67208	0.0945083	0.753419
6330403l08rik	1.12438	0.459955	0.275194	1.67138	0.0946461	0.753419
b3gat1	11.3445	0.147224	0.0880663	1.67174	0.0945754	0.753419
ddx24	72.1176	-0.0595517	0.0356338	-1.67121	0.0946797	0.753419
h2afx	35.0202	0.0841406	0.0503823	1.67004	0.0949111	0.754717
clk3	12.4518	0.139978	0.083845	1.66948	0.0950224	0.754811
skp2	3.90016	-0.262596	0.157374	-1.6686	0.0951958	0.754811
nfkbil1	7.7805	0.17681	0.105943	1.66891	0.0951352	0.754811
ai837181	7.77456	-0.183722	0.110097	-1.66873	0.0951705	0.754811
tubgcp3	2.78618	0.304626	0.182703	1.66733	0.0954492	0.756278
lrrc4	9.65008	0.158653	0.0951925	1.66666	0.095583	0.756795
mbd2	1.56247	0.396774	0.238115	1.66631	0.0956521	0.756801
zfp94	3.04731	-0.295705	0.177502	-1.66593	0.0957278	0.756859
ssr2	40.6127	-0.0793155	0.0476223	-1.66551	0.0958108	0.756974
kif1b	99.4075	0.0498629	0.0299701	1.66376	0.0961613	0.758659
zdhhc13	4.50196	0.230841	0.138746	1.66376	0.0961599	0.758659
gda	41.0317	0.0776293	0.046674	1.66322	0.0962678	0.758958
smim10l1	86.431	-0.0541803	0.0325843	-1.66277	0.0963577	0.759125
adamts3	2.10143	-0.369963	0.222591	-1.66208	0.0964974	0.759686
becn1	29.2974	0.0915291	0.055099	1.66118	0.0966782	0.760567
rfc5	3.87067	0.248372	0.14956	1.66068	0.0967776	0.760808
adnp2	1.88345	0.362884	0.218577	1.66021	0.0968718	0.761008
zfp664	25.5579	-0.0998826	0.0601887	-1.65949	0.0970165	0.761291
ahi1	45.3654	0.0736394	0.0443785	1.65935	0.0970455	0.761291
rragc	8.64136	0.166578	0.100488	1.65769	0.0973807	0.762299
thop1	4.81383	0.221806	0.133796	1.65779	0.0973593	0.762299
zfp874b	1.29622	0.428233	0.258279	1.65802	0.0973128	0.762299
pak7	40.7398	-0.0789103	0.0476274	-1.65683	0.0975547	0.76245
pdlim5	2.14844	-0.363335	0.219266	-1.65705	0.0975091	0.76245
zfp35	2.2812	0.324949	0.196158	1.65657	0.0976069	0.76245
ptprn	18.1638	0.115476	0.0697439	1.65572	0.0977792	0.762719
gtpbp1	5.14245	-0.226291	0.136657	-1.6559	0.0977421	0.762719
lgals7	2.01589	0.34849	0.210579	1.65492	0.0979416	0.763448
spon1	5.99808	0.199334	0.120521	1.65393	0.0981411	0.763959
ccdc186	11.225	-0.151595	0.0916584	-1.65391	0.0981454	0.763959
snrpc	50.7485	-0.0702852	0.0425064	-1.65352	0.0982252	0.764043
rpl34	358.916	0.0261898	0.0158465	1.65272	0.0983888	0.764422
atp6v0a1	26.7137	0.0949735	0.0574691	1.6526	0.0984122	0.764422
chmp4b	41.8533	0.0761915	0.0461612	1.65055	0.0988298	0.764563
slc25a22	19.2065	0.11202	0.0678392	1.65125	0.098687	0.764563
wdr83	10.0307	-0.159663	0.0966809	-1.65144	0.098648	0.764563
bbs2	1.07152	-0.536715	0.325187	-1.65048	0.0988451	0.764563
ppp2r2a	38.6643	0.0791001	0.0479194	1.65069	0.0988019	0.764563
rasa1	13.5721	0.132855	0.0804167	1.65209	0.0985167	0.764563
gm3294	5.00471	0.216592	0.131322	1.64933	0.099081	0.765318
cnbp	104.073	-0.0489443	0.02967	-1.64962	0.0990202	0.765318
cdpf1	8.9489	0.163427	0.0991173	1.64882	0.0991848	0.765585
rnf113a2	5.7542	-0.212673	0.129056	-1.64791	0.0993703	0.766482
sfmbt2	1.4967	0.400358	0.243035	1.64732	0.0994913	0.76688
1700025g04rik	22.2247	0.103892	0.063095	1.6466	0.0996396	0.76708
cbfa2t2	8.31582	0.168815	0.102549	1.64619	0.0997253	0.76708
brap	6.7953	0.186088	0.113031	1.64634	0.0996934	0.76708
emid1	16.8836	-0.122347	0.0743383	-1.64582	0.0998011	0.76713
nr4a2	3.66701	0.447874	0.272265	1.64499	0.0999719	0.767909
aldh4a1	1.3329	0.419036	0.255083	1.64274	0.100436	0.769964
1500011b03rik	79.8983	0.0549545	0.0334677	1.64201	0.100587	0.769964
tmem132c	1.79927	-0.397776	0.242249	-1.64201	0.100587	0.769964
epb41l2	9.90347	-0.159993	0.097406	-1.64253	0.10048	0.769964
hmgn1	74.2584	-0.057756	0.0351514	-1.64306	0.10037	0.769964
creb3	8.94736	-0.168527	0.102701	-1.64096	0.100807	0.770058
ccdc25	6.37458	-0.199369	0.121482	-1.64114	0.100769	0.770058
rbfox2	65.8856	0.0604879	0.0368616	1.64095	0.100809	0.770058
lrrtm1	16.7416	0.118602	0.0723304	1.63973	0.101062	0.770399
pomc	3.8062	0.257731	0.157178	1.63974	0.101059	0.770399
sh3gl1	12.7649	-0.140838	0.0858687	-1.64015	0.100973	0.770399
dync1li1	25.6837	0.0962817	0.0587391	1.63914	0.101184	0.770798
schip1.1	8.29474	-0.174333	0.106407	-1.63836	0.101346	0.771498
lypd6	8.70608	0.163632	0.0999354	1.63738	0.101551	0.771579
chd7	1.29723	-0.476905	0.291273	-1.63731	0.101566	0.771579
parp6	53.7939	-0.0676932	0.0413437	-1.63733	0.101562	0.771579
slc7a6	2.76202	0.296701	0.181311	1.63642	0.101753	0.772091
paqr4	14.8628	-0.129869	0.0793664	-1.63632	0.101773	0.772091
ccser2	29.9054	-0.0909416	0.0556879	-1.63306	0.102457	0.773695
eef1a1	991.137	0.0156062	0.00954643	1.63477	0.102098	0.773695
rab34	39.991	-0.0784857	0.0480586	-1.63313	0.102442	0.773695
slc9a3r1	5.89421	-0.207204	0.126786	-1.63428	0.1022	0.773695
alyref	8.05528	-0.176616	0.108134	-1.6333	0.102407	0.773695
ncoa1	19.7479	-0.112257	0.068758	-1.63264	0.102544	0.773695
syt16	31.124	0.0873447	0.0534437	1.63433	0.102189	0.773695
napg	32.0016	0.085861	0.0525849	1.63281	0.102509	0.773695
magee1	12.9791	0.134223	0.0822891	1.63112	0.102865	0.775587
clock	24.4424	-0.100022	0.0613914	-1.62925	0.103261	0.778043
nfyb	12.062	0.13913	0.0854179	1.62882	0.103351	0.778192
ric3	16.5205	-0.122351	0.0751362	-1.62839	0.103442	0.778345
rac1	40.3675	0.0764906	0.0469957	1.62761	0.103608	0.779068
capza1	13.95	-0.132695	0.0816037	-1.62609	0.103931	0.779379
id3	68.8674	-0.13717	0.084338	-1.62643	0.103857	0.779379
sh2d5	5.4854	-0.214567	0.131934	-1.62632	0.103882	0.779379
pdcd5	120.439	0.044362	0.0272731	1.62659	0.103825	0.779379
creg2	19.2032	0.109717	0.0676227	1.62249	0.104698	0.780131
slc25a25	6.00989	-0.204473	0.126027	-1.62245	0.104706	0.780131
hint2	22.7288	-0.103324	0.0636915	-1.62226	0.104748	0.780131
dnajc2	17.5625	0.115078	0.0709489	1.62198	0.104807	0.780131
rasal1	4.55411	0.223018	0.137465	1.62236	0.104726	0.780131
atp2a2	80.5874	-0.0547594	0.0337419	-1.62289	0.104612	0.780131
ing4	15.7053	-0.125362	0.0771589	-1.62472	0.104222	0.780131
lyrm5	4.47631	-0.237882	0.146629	-1.62234	0.10473	0.780131
zfp382	1.01622	-0.565123	0.347959	-1.62411	0.104353	0.780131
slc30a5	4.89782	0.216034	0.133127	1.62277	0.104639	0.780131
alkbh1	28.8726	-0.0917832	0.0565596	-1.62277	0.104639	0.780131
mir124a-1hg	5.50115	0.204249	0.126057	1.62029	0.105169	0.781833
pacsin2	2.85973	-0.307285	0.189652	-1.62026	0.105177	0.781833
fam43b	8.83947	-0.167203	0.103223	-1.61983	0.10527	0.781993
zdbf2	1.05098	0.46025	0.284349	1.61861	0.105532	0.783413
s100a16	17.6272	-0.11765	0.0727249	-1.61774	0.105719	0.783658
lrig1	1.92691	-0.369395	0.228335	-1.61777	0.105712	0.783658
prrc1	3.91084	0.24152	0.14932	1.61747	0.105777	0.783658
syt1	301.61	0.0279393	0.0172802	1.61684	0.105913	0.784139
dnajc10	10.7128	-0.151306	0.0936689	-1.61533	0.106239	0.784646
ptprf	21.1975	0.104362	0.0646794	1.61352	0.106631	0.784646
gm15800	26.1731	0.0937661	0.0582242	1.61043	0.107303	0.784646
tmem106b	15.8863	0.120234	0.074496	1.61396	0.106535	0.784646
hibadh	9.4085	0.15495	0.0960999	1.61238	0.106879	0.784646
l3mbtl3	23.3027	-0.101829	0.0630512	-1.61503	0.106305	0.784646
rnf217	5.46337	0.204403	0.126549	1.6152	0.106267	0.784646
gm2237	1.16214	0.449328	0.278984	1.61059	0.10727	0.784646
fbxo22	11.8327	0.139221	0.0862266	1.61459	0.106399	0.784646
trim41	6.29594	0.189799	0.117679	1.61285	0.106777	0.784646
hspb3	28.4168	-0.0921742	0.0570772	-1.6149	0.106332	0.784646
klf10	8.80755	-0.166204	0.103229	-1.61005	0.107387	0.784646
pvt1	4.38563	0.227363	0.14122	1.60999	0.1074	0.784646
grik1	3.4134	-0.270543	0.167985	-1.61051	0.107286	0.784646
mrpl18	63.0359	-0.0614666	0.0381488	-1.61123	0.107129	0.784646
pacsin1	15.9177	-0.123165	0.0764481	-1.6111	0.107159	0.784646
ay036118	1.14173	0.445073	0.27596	1.61282	0.106784	0.784646
gnal	31.8311	0.0850572	0.0528111	1.61059	0.107268	0.784646
psat1	6.03582	0.193228	0.119915	1.61137	0.107098	0.784646
cep78	2.91303	-0.303471	0.188085	-1.61348	0.10664	0.784646
tmem206	1.90163	-0.373632	0.232186	-1.60919	0.107574	0.785399
tmem17	5.77087	0.197559	0.122845	1.6082	0.107791	0.785943
ubxn1	43.4233	0.0728539	0.0453015	1.6082	0.107791	0.785943
skiv2l2	4.77249	-0.227192	0.141304	-1.60783	0.107873	0.786027
zfp322a	23.9052	0.097988	0.0610047	1.60624	0.108222	0.788047
polr2d	22.3366	0.101254	0.0630714	1.60538	0.108409	0.788893
rgs7	33.4294	0.0826774	0.0515165	1.60487	0.108522	0.789193
d3ertd751e	2.17156	-0.347215	0.216427	-1.60431	0.108646	0.789574
etv1	7.19768	0.258947	0.161602	1.60238	0.109072	0.792148
stambp	10.1967	-0.153211	0.0956637	-1.60156	0.109252	0.792941
csnk1a1	82.5032	-0.0533085	0.0332931	-1.60119	0.109335	0.793019
chst10	11.8143	-0.142194	0.0889912	-1.59784	0.110079	0.793251
gad1	11.1498	-0.147334	0.092083	-1.60002	0.109595	0.793251
dynlt3	34.3239	0.0812009	0.0509486	1.59378	0.110985	0.793251
eif5a2	3.3578	-0.270739	0.170088	-1.59176	0.111439	0.793251
tox	2.91701	0.298543	0.187261	1.59426	0.110877	0.793251
cdk5rap2	2.72833	-0.314174	0.197068	-1.59424	0.110881	0.793251
mtor	10.724	-0.149557	0.0939276	-1.59226	0.111327	0.793251
ppm1g	24.5597	0.0961738	0.0603599	1.59334	0.111084	0.793251
glmn	8.00069	-0.172752	0.108524	-1.59184	0.111422	0.793251
caln1	91.3192	0.0500432	0.0313162	1.598	0.110043	0.793251
arntl2	1.28097	0.423224	0.265271	1.59544	0.110614	0.793251
cox7a1	1.77464	-0.388934	0.242997	-1.60057	0.109473	0.793251
mapk3	59.2157	0.0618207	0.0387968	1.59345	0.11106	0.793251
ankrd10	11.0691	0.142089	0.0892423	1.59217	0.111346	0.793251
aars	15.7663	0.119186	0.0747276	1.59494	0.110726	0.793251
acsbg1	6.81463	-0.188504	0.118054	-1.59676	0.11032	0.793251
abhd14a	34.6149	0.0811455	0.0508416	1.59604	0.110479	0.793251
osbp2	16.1046	-0.120636	0.0756129	-1.59544	0.110613	0.793251
rtn4rl1	15.4785	-0.123444	0.0775535	-1.59172	0.111447	0.793251
taco1os	1.91193	-0.374979	0.234987	-1.59574	0.110546	0.793251
psmg4	22.9438	-0.101725	0.0638235	-1.59385	0.11097	0.793251
pou5f2	1.90949	0.34266	0.214635	1.59648	0.110382	0.793251
arl15	7.386	-0.180208	0.112711	-1.59885	0.109855	0.793251
pop1	2.13022	-0.35189	0.221005	-1.59223	0.111334	0.793251
2510009e07rik	15.4232	0.121171	0.0757394	1.59984	0.109634	0.793251
tfrc	8.37114	-0.169111	0.106121	-1.59356	0.111035	0.793251
kalrn	28.1012	-0.0917067	0.0573782	-1.59829	0.109979	0.793251
dirc2	12.7839	0.132346	0.0830105	1.59433	0.110862	0.793251
tctn3	2.3558	0.309586	0.193725	1.59807	0.110028	0.793251
slc2a3	10.5535	0.145319	0.0913459	1.59086	0.111641	0.794123
evi5l	9.33638	-0.158991	0.100043	-1.58923	0.112008	0.796223
abtb2	1.76294	-0.384491	0.242095	-1.58818	0.112245	0.797283
dlc1	9.44405	0.153052	0.0963846	1.58793	0.112301	0.797283
jak1	23.0936	0.098352	0.0619548	1.58748	0.112404	0.797498
jazf1	1.89741	0.339906	0.214279	1.58628	0.112676	0.797963
zfp668	5.68009	-0.205434	0.129539	-1.58589	0.112764	0.797963
oaz1	448.663	0.0224921	0.0141851	1.58561	0.112827	0.797963
ppp6r2	1.93578	-0.3716	0.234254	-1.58631	0.112669	0.797963
gnl1	14.4305	-0.1273	0.0802851	-1.5856	0.11283	0.797963
5730522e02rik	3.72221	0.23968	0.151225	1.58492	0.112983	0.798536
nutf2	9.57294	-0.157488	0.0993935	-1.58449	0.113082	0.798725
fam19a1	58.0055	0.0620547	0.0392172	1.58234	0.113573	0.801398
rpsa	551.984	0.0202307	0.0127911	1.58162	0.113736	0.801398
ak6	27.1784	0.0903942	0.0571468	1.58179	0.113698	0.801398
alkbh7	12.2294	0.133754	0.0845709	1.58156	0.113751	0.801398
grm2	6.32685	-0.192447	0.121751	-1.58066	0.113955	0.801819
aw495222	1.21269	-0.468684	0.296473	-1.58087	0.113909	0.801819
plcxd1	1.19633	-0.47093	0.298084	-1.57986	0.114139	0.802604
lrrc3	5.08316	0.206595	0.130838	1.57901	0.114334	0.803143
mtpap	4.67314	0.214976	0.136156	1.57889	0.114361	0.803143
atp5j2	223.463	-0.031897	0.0202088	-1.57838	0.114479	0.80346
ppp1r2	51.0129	0.0659423	0.0418127	1.57709	0.114775	0.80503
kif13a	3.40773	-0.265375	0.168561	-1.57436	0.115405	0.808933
a830018l16rik	24.1483	-0.0966563	0.0619761	-1.55957	0.11886	0.8093
igfbp5	42.7153	-0.162187	0.10342	-1.56825	0.116823	0.8093
inha	11.9563	0.134182	0.085857	1.56285	0.118087	0.8093
usp40	5.82945	-0.199453	0.12803	-1.55785	0.119268	0.8093
acbd3	6.94086	-0.183542	0.11681	-1.57129	0.116116	0.8093
zc3h15	56.8165	0.0618073	0.039635	1.55941	0.118898	0.8093
pltp	2.88411	-0.295532	0.18908	-1.563	0.118053	0.8093
b630019k06rik	3.80284	0.235841	0.150743	1.56452	0.117695	0.8093
gnl3l	28.6161	0.086587	0.0556491	1.55595	0.119721	0.8093
eif1ax	64.8419	0.057925	0.037201	1.55708	0.11945	0.8093
txnip	9.65226	-0.154867	0.0986348	-1.5701	0.116391	0.8093
gpr61	4.65911	0.212501	0.136442	1.55745	0.119364	0.8093
ddah1	21.6421	0.100266	0.0640297	1.56593	0.117365	0.8093
mob3c	1.0647	0.443701	0.285158	1.55598	0.119712	0.8093
ncdn	59.6404	0.0606262	0.0385533	1.57253	0.115828	0.8093
ept1	11.3924	-0.14239	0.0906303	-1.5711	0.116158	0.8093
cgref1	33.0947	0.0807281	0.0518951	1.5556	0.119803	0.8093
grpel1	28.0979	-0.0891338	0.0573168	-1.55511	0.119921	0.8093
tchp	1.72356	-0.39263	0.252455	-1.55524	0.119888	0.8093
msi1	8.23835	-0.167856	0.106961	-1.56931	0.116576	0.8093
psmd9	22.3451	-0.100108	0.0642608	-1.55784	0.119271	0.8093
hip1	6.42901	0.182103	0.116272	1.56617	0.117308	0.8093
tmem130	18.0384	0.109108	0.0700998	1.55647	0.119597	0.8093
polr1d	113.209	0.0441509	0.028142	1.56886	0.116681	0.8093
npas1	3.17755	0.342823	0.218745	1.56722	0.117063	0.8093
tmem91	14.8608	0.120766	0.0769275	1.56986	0.116447	0.8093
shkbp1	2.47103	0.299778	0.191112	1.5686	0.116742	0.8093
sirt2	25.7834	-0.0936504	0.0599101	-1.56318	0.118009	0.8093
lrp3	9.90879	0.146579	0.0941972	1.55608	0.119688	0.8093
ndn	65.3481	0.0577744	0.0369755	1.56251	0.118169	0.8093
zfand6	42.3914	-0.0732076	0.0465709	-1.57196	0.11596	0.8093
ilk	17.3189	-0.114865	0.0733264	-1.5665	0.117233	0.8093
atxn2l	10.482	-0.146872	0.0944019	-1.55582	0.119751	0.8093
chid1	9.79775	-0.153367	0.0978974	-1.56661	0.117206	0.8093
cd81	72.7077	-0.0555341	0.0354508	-1.56651	0.117228	0.8093
gm10827	1.43801	0.395128	0.253712	1.55739	0.119379	0.8093
cactin	8.81181	-0.162881	0.10356	-1.57282	0.115761	0.8093
fbxw9	15.571	0.118386	0.0754578	1.5689	0.116671	0.8093
adat1	1.38334	0.396535	0.253845	1.56211	0.118261	0.8093
taf1c	1.27516	0.416904	0.265516	1.57016	0.116377	0.8093
rpl21-ps4	1.9951	-0.359673	0.231272	-1.55519	0.1199	0.8093
ifrd2	2.22341	-0.337137	0.216782	-1.55519	0.119901	0.8093
snrk	13.7774	0.124357	0.079836	1.55766	0.119314	0.8093
zswim7	4.29988	0.221357	0.142195	1.55671	0.119538	0.8093
crhr1	13.0561	0.127328	0.0818037	1.55651	0.119587	0.8093
pecam1	4.90758	0.207719	0.132945	1.56245	0.118183	0.8093
cbx4	7.80221	0.165452	0.106068	1.55987	0.11879	0.8093
gm9866	7.76886	0.166618	0.106612	1.56284	0.118091	0.8093
cpsf2	13.4848	0.125973	0.0809504	1.55617	0.119667	0.8093
hrsp12	5.49946	-0.207524	0.132277	-1.56885	0.116682	0.8093
polr2k	51.2378	0.0653765	0.0416471	1.56977	0.116468	0.8093
med30	16.7197	0.113094	0.0726977	1.55568	0.119784	0.8093
kansl2	24.2517	-0.096631	0.0618095	-1.56337	0.117966	0.8093
mtch1	29.0052	0.0870748	0.0553581	1.57294	0.115733	0.8093
zfp563	1.24377	-0.464843	0.29835	-1.55804	0.119223	0.8093
zfp101	12.0219	-0.13852	0.0883451	-1.56794	0.116895	0.8093
zfp119b	1.0554	-0.497958	0.319734	-1.55741	0.119372	0.8093
ss18	2.40612	-0.321037	0.206089	-1.55776	0.11929	0.8093
srp19	70.0684	0.0557656	0.0357454	1.56008	0.118742	0.8093
pcdhb7	3.26464	-0.28096	0.180651	-1.55526	0.119883	0.8093
ccdc86	7.95864	-0.169456	0.108593	-1.56046	0.118651	0.8093
eif4g3	61.595	-0.0600402	0.0386462	-1.55359	0.120283	0.811253
plk2	81.7674	-0.0518652	0.0334252	-1.55168	0.120739	0.813385
ppp2r5d	9.24143	0.150564	0.0970544	1.55134	0.12082	0.813385
mt-nd2	242.357	0.0299137	0.0192805	1.5515	0.120782	0.813385
rnasel	3.74383	0.233513	0.150671	1.54982	0.121184	0.813962
ergic2	27.685	0.0876925	0.056556	1.55054	0.121012	0.813962
aldh1l2	2.15387	-0.338816	0.218582	-1.55007	0.121126	0.813962
sirt5	4.65677	-0.221059	0.142641	-1.54976	0.1212	0.813962
unkl	3.48137	-0.256328	0.165479	-1.54901	0.121379	0.81467
lurap1l	5.28123	0.19878	0.12857	1.54609	0.122083	0.816364
mepce	5.87473	-0.196649	0.12711	-1.54708	0.121844	0.816364
mrpl48	32.2809	0.0812338	0.0525818	1.5449	0.12237	0.816364
hmgb2	17.8796	-0.111674	0.0722448	-1.54577	0.12216	0.816364
ubp1	7.29814	-0.176163	0.113966	-1.54576	0.122163	0.816364
prpsap1	16.0849	-0.117739	0.076172	-1.54569	0.122179	0.816364
ndufs4	74.0619	-0.054383	0.0352005	-1.54495	0.122359	0.816364
wash1	8.1916	-0.165711	0.107231	-1.54536	0.12226	0.816364
tnks2	21.3119	0.0997062	0.0644246	1.54764	0.121709	0.816364
actr1a	32.71	0.0805167	0.0521083	1.54518	0.122303	0.816364
fxr1	10.2208	0.142518	0.0923234	1.54369	0.122664	0.816368
bri3bp	21.5401	0.0988859	0.0640585	1.54368	0.122666	0.816368
cml1	3.49624	-0.255035	0.165145	-1.54431	0.122512	0.816368
slc25a36	18.5188	-0.10896	0.0705779	-1.54382	0.122632	0.816368
cpox	4.57721	-0.221819	0.143776	-1.54282	0.122876	0.817274
gpr85	40.2935	0.0724207	0.0469884	1.54125	0.123257	0.817923
1700017b05rik	1.18714	-0.468246	0.303684	-1.54189	0.123101	0.817923
gtf2h5	153.781	0.0372635	0.0241725	1.54157	0.123179	0.817923
pdzd8	14.1724	-0.124633	0.0808675	-1.5412	0.123269	0.817923
inafm2	3.33774	-0.259148	0.168285	-1.53994	0.123575	0.817992
rims4	14.1661	0.121416	0.0788298	1.54023	0.123505	0.817992
pfn4	1.44303	-0.414531	0.269086	-1.54051	0.123435	0.817992
tmem121	38.353	0.0743325	0.0482445	1.54075	0.123379	0.817992
sema6c	11.4701	-0.138761	0.0901463	-1.53929	0.123733	0.818061
wdr81	1.06886	0.440922	0.28641	1.53948	0.123688	0.818061
resp18	7.57626	0.165833	0.10802	1.53521	0.124732	0.818301
vangl2	6.75288	-0.182543	0.118728	-1.53749	0.124172	0.818301
acvr2a	9.91875	0.144718	0.0941483	1.53713	0.124262	0.818301	Septa
rab9	16.8907	-0.114172	0.0742657	-1.53734	0.124211	0.818301
phf14	37.2159	0.0750536	0.048837	1.53682	0.124338	0.818301
slc25a15	1.35017	-0.443597	0.288298	-1.53867	0.123884	0.818301
birc2	5.57128	0.191594	0.124735	1.53601	0.124536	0.818301
bcl11a	105.846	-0.045182	0.0294094	-1.53631	0.124462	0.818301
zfp944	2.61962	0.287513	0.187041	1.53717	0.124252	0.818301
gm5093	2.35519	-0.317096	0.206146	-1.53821	0.123998	0.818301
pex6	2.54108	0.288748	0.188066	1.53536	0.124696	0.818301
usmg5	239.515	-0.0299863	0.0195302	-1.53538	0.124691	0.818301
trub1	10.2619	-0.147602	0.096093	-1.53603	0.124532	0.818301
tvp23a	5.88652	0.186867	0.121787	1.53438	0.124937	0.819166
rassf8	3.37106	-0.258211	0.168349	-1.53379	0.125082	0.819629
ralb	12.8531	-0.130811	0.0853071	-1.53342	0.125173	0.819741
gprasp2	8.68033	0.154227	0.100694	1.53163	0.125613	0.821679
smarcd1	34.7927	-0.0790447	0.0516088	-1.53161	0.125618	0.821679
serp1	33.8485	0.0784991	0.0513195	1.52962	0.126112	0.822478
rapgef2	9.73479	0.144954	0.094759	1.52971	0.126089	0.822478
ddi2	3.28357	0.248956	0.16264	1.53072	0.125839	0.822478
mfsd10	10.5042	-0.144534	0.0944438	-1.53037	0.125926	0.822478
phkg2	18.0964	-0.109757	0.0717432	-1.52986	0.126052	0.822478
gpr26	6.99984	0.171022	0.111872	1.52873	0.126332	0.823428
gm26917	25.7803	0.089661	0.0586738	1.52813	0.126481	0.823913
egr4	2.30849	0.298336	0.195296	1.52761	0.126611	0.824273
atf7	8.2014	-0.163258	0.106977	-1.5261	0.126985	0.826226
nhp2	63.0938	-0.0582372	0.0381824	-1.52524	0.1272	0.827136
smyd2	54.999	0.0614582	0.0403083	1.5247	0.127333	0.827399
hmg20a	7.06738	0.169227	0.111007	1.52448	0.12739	0.827399
ppid	14.1976	-0.123794	0.0812313	-1.52397	0.127516	0.827734
adpgk	4.25014	-0.247416	0.162419	-1.52332	0.127679	0.828301
txnrd3	5.52554	0.19163	0.125848	1.52271	0.127832	0.828808
tmem183a	30.9124	0.0815498	0.0535822	1.52195	0.12802	0.829545
rims1	25.18	0.0900933	0.0592908	1.51952	0.128633	0.831195
wdfy1	14.6352	0.117066	0.0775531	1.50949	0.131174	0.831195
ddx59	1.33039	-0.427879	0.282344	-1.51545	0.129658	0.831195
syt14	5.22593	-0.203604	0.134808	-1.51032	0.130961	0.831195
fmnl2	7.50182	0.163054	0.107903	1.51111	0.13076	0.831195
dph6	5.1533	-0.207823	0.137322	-1.5134	0.130177	0.831195
pak6	24.0275	0.0923548	0.0608259	1.51835	0.128927	0.831195
rassf2	2.41073	-0.388509	0.255505	-1.52056	0.128371	0.831195
ppp1r3f	1.65281	-0.383908	0.25435	-1.50937	0.131205	0.831195
zmat1	2.70817	0.274817	0.182208	1.50826	0.131489	0.831195
prcc	7.73016	-0.168058	0.110804	-1.51672	0.129338	0.831195
nfia	23.0734	-0.0964358	0.0634507	-1.51985	0.128548	0.831195
tmem50a	41.1088	0.0707591	0.0465838	1.51896	0.128772	0.831195
pramef8	1.92329	0.329583	0.218177	1.51062	0.130886	0.831195
rbm48	5.53164	-0.198439	0.131172	-1.51282	0.130325	0.831195
krit1	52.289	-0.0632553	0.0418301	-1.5122	0.130484	0.831195
p2rx4	1.7407	-0.373832	0.24754	-1.51019	0.130996	0.831195
hivep2	47.5864	0.0655485	0.0432686	1.51492	0.129793	0.831195
cdk4	26.4811	-0.0898063	0.0592392	-1.51599	0.129521	0.831195
cpe	145.687	-0.0378156	0.0250287	-1.51089	0.130816	0.831195
crlf1	5.90154	-0.191607	0.12644	-1.5154	0.129671	0.831195
dda1	127.811	0.0402595	0.0265061	1.51888	0.128794	0.831195
hsdl1	9.26912	0.1473	0.0974189	1.51202	0.130528	0.831195
nkiras1	32.6526	-0.0802154	0.053152	-1.50917	0.131255	0.831195
parg	8.43557	-0.16013	0.105616	-1.51615	0.129481	0.831195
kpna3	26.6219	0.0872642	0.057711	1.51209	0.130511	0.831195
rwdd2a	4.52682	0.209348	0.138603	1.51042	0.130938	0.831195
ppm1m	7.83001	-0.166656	0.110403	-1.50952	0.131165	0.831195
wdr6	18.7254	0.103803	0.0688034	1.50869	0.131377	0.831195
dgke	9.92693	0.142062	0.0937676	1.51504	0.129761	0.831195
tmem94	3.21083	-0.263125	0.173667	-1.51511	0.129745	0.831195
zmynd11	35.7174	0.0758976	0.0500671	1.51592	0.12954	0.831195
cdk13	6.76286	-0.179282	0.11867	-1.51077	0.130848	0.831195
atp6ap1l	3.23871	-0.277953	0.183537	-1.51442	0.129918	0.831195
slirp	33.5452	0.0782411	0.0515426	1.51799	0.129018	0.831195
otub2	3.04943	0.260391	0.172651	1.50819	0.131506	0.831195
dennd6b	9.01729	0.149016	0.0983163	1.51568	0.129602	0.831195
scaf11	11.8513	-0.13424	0.0884832	-1.51712	0.129236	0.831195
cdip1	15.1675	-0.119302	0.0784919	-1.51993	0.12853	0.831195
dpy30	47.3934	-0.0665361	0.044092	-1.50903	0.131291	0.831195
atl2	9.55326	0.144328	0.0954749	1.51169	0.130614	0.831195
erlin1	8.12084	-0.162697	0.107477	-1.51378	0.130083	0.831195
xpnpep1	9.89841	0.141711	0.0938966	1.50922	0.131242	0.831195
smg7	10.8448	0.135242	0.0897039	1.50765	0.131644	0.831204
tlk2	5.98121	0.183359	0.121624	1.5076	0.131658	0.831204
hars2	4.93789	0.200439	0.133039	1.50661	0.131909	0.832316
mgrn1	16.8411	-0.112208	0.0745002	-1.50614	0.13203	0.832604
tbc1d8	2.1468	-0.331278	0.220461	-1.50266	0.132926	0.833222
lemd1	1.09964	-0.473839	0.315291	-1.50286	0.132875	0.833222
rpl7a	39.7454	-0.0722092	0.0480953	-1.50138	0.133258	0.833222
itga6	2.5203	-0.301419	0.200644	-1.50226	0.13303	0.833222
dstn	101.671	0.0446342	0.0297198	1.50183	0.13314	0.833222
akr1a1	176.065	0.0339848	0.0226174	1.5026	0.132943	0.833222
fam21	11.4043	-0.135842	0.0904405	-1.50201	0.133095	0.833222
4732471j01rik	1.40207	0.388427	0.258539	1.50239	0.132996	0.833222
1810043g02rik	18.4738	0.103767	0.0690426	1.50294	0.132855	0.833222
cfap20	25.9319	0.0877999	0.0584712	1.50159	0.133202	0.833222
fam101b	10.1535	0.140461	0.0934726	1.50269	0.132918	0.833222
lyrm4	11.1655	0.133256	0.0885845	1.50428	0.132509	0.833222
gm6576	2.1068	0.310525	0.206429	1.50427	0.132511	0.833222
rhot2	5.67028	0.185411	0.123482	1.50151	0.133222	0.833222
fads2	2.32183	-0.313896	0.208658	-1.50436	0.132489	0.833222
stard7	38.356	0.0722467	0.0481676	1.4999	0.13364	0.834663
actn4	13.4684	0.121514	0.0809992	1.50019	0.133565	0.834663
rnf144a	6.04161	0.179995	0.120038	1.49948	0.133748	0.834868
nudcd2	15.7462	-0.114842	0.0766079	-1.49909	0.133851	0.835038
wdr89	27.9646	0.0845864	0.0564394	1.49871	0.133948	0.835176
dhx9	17.4262	-0.1093	0.0729951	-1.49736	0.1343	0.836599
synj1	37.46	0.0730459	0.0487867	1.49725	0.134328	0.836599
dnajc18	8.54751	-0.15707	0.104936	-1.49681	0.134442	0.836839
0610009l18rik	9.6164	-0.147646	0.0987042	-1.49584	0.134694	0.837938
npy1r	3.11577	0.256914	0.171896	1.49459	0.135022	0.839036
fam212a	1.26745	0.397975	0.266277	1.49459	0.135021	0.839036
2700094k13rik	108.435	0.0429846	0.0287832	1.49339	0.135335	0.840057
rpn2	12.5159	-0.129259	0.086555	-1.49338	0.135339	0.840057
cldn34c1	2.63149	0.277308	0.185743	1.49297	0.135445	0.840144
mrpl11	47.0171	-0.0660519	0.0442487	-1.49274	0.135505	0.840144
slc2a6	3.99378	0.219814	0.147503	1.49023	0.136164	0.840934
hsd17b12	10.748	0.13508	0.0905809	1.49126	0.135893	0.840934
sorcs2	10.7071	-0.139155	0.0933665	-1.49042	0.136115	0.840934
crtc3	17.9113	-0.106943	0.0716804	-1.49195	0.135713	0.840934
ube2e1	60.0899	-0.0581123	0.0389776	-1.49092	0.135983	0.840934
3110039m20rik	1.31246	0.384272	0.257809	1.49053	0.136085	0.840934
zfp707	8.85741	0.148561	0.099594	1.49167	0.135786	0.840934
au019823	25.03	-0.0902111	0.0605523	-1.4898	0.136276	0.841154
thbs3	4.09563	0.216414	0.145414	1.48826	0.136682	0.841339
tmem39b	2.71257	0.270421	0.181614	1.48899	0.13649	0.841339
lrrc8b	36.7327	-0.0743611	0.0499881	-1.48758	0.136863	0.841339
rbm19	2.91105	-0.271129	0.182286	-1.48738	0.136914	0.841339
gm3739	3.57962	-0.245664	0.165006	-1.48882	0.136534	0.841339
ascc2	2.57827	0.275139	0.184967	1.4875	0.136883	0.841339
rrm2b	5.30174	-0.19947	0.134078	-1.48772	0.136826	0.841339
esco1	4.3069	-0.221074	0.148453	-1.48918	0.13644	0.841339
acss1	1.98331	-0.354039	0.238583	-1.48393	0.137828	0.84134
arxes1	33.3066	0.0767214	0.0517087	1.48372	0.137882	0.84134
nup210	3.13095	0.245744	0.16536	1.48612	0.137248	0.84134
fam13c	7.63626	-0.16533	0.111426	-1.48376	0.137872	0.84134
cck	288.479	0.0727976	0.0489892	1.48599	0.137281	0.84134
sparc	14.6357	-0.118717	0.0799864	-1.48422	0.137751	0.84134
zfp652	4.78644	-0.209809	0.141391	-1.48389	0.137839	0.84134
chga	29.0156	-0.0835735	0.0563299	-1.48364	0.137903	0.84134
brf1	5.45062	0.187449	0.126339	1.4837	0.137889	0.84134
efna5	34.2647	0.0759586	0.0510991	1.4865	0.137148	0.84134
hbegf	28.5057	-0.0846272	0.056953	-1.48591	0.137302	0.84134
ccs	7.14173	-0.169955	0.114513	-1.48416	0.137767	0.84134
capn1	1.1896	-0.444144	0.299173	-1.48457	0.137656	0.84134
tshz3	12.3462	0.126115	0.0850383	1.48303	0.138066	0.841866
ptma	477.163	-0.0204033	0.0138014	-1.47835	0.139315	0.842134
ggt7	15.6432	-0.114663	0.0774799	-1.47991	0.138898	0.842134
ndufs5	226.384	-0.0297182	0.0200787	-1.48009	0.13885	0.842134
dcdc2b	3.34261	-0.256807	0.173635	-1.47901	0.139138	0.842134
aurkaip1	53.3271	-0.06124	0.0414618	-1.47702	0.13967	0.842134
pclo	38.9318	0.0704791	0.0477217	1.47688	0.139709	0.842134
tfip11	3.01913	-0.26114	0.176771	-1.47728	0.139601	0.842134
sbno1	32.8772	0.076667	0.0519315	1.47631	0.139861	0.842134
mrps17	55.0872	0.0595476	0.0402317	1.48012	0.138842	0.842134
lrrc61	2.46723	-0.304646	0.205634	-1.4815	0.138473	0.842134
snrpg	23.133	0.0919764	0.062067	1.48189	0.13837	0.842134
tmem145	36.7433	-0.0739864	0.0501082	-1.47653	0.139801	0.842134
lims1	8.03511	0.154468	0.104449	1.4789	0.139168	0.842134
klf16	2.65486	0.275041	0.1856	1.48191	0.138365	0.842134
cdadc1	7.05246	-0.171626	0.116006	-1.47946	0.139018	0.842134
bmp1	4.89369	0.196992	0.133109	1.47993	0.138892	0.842134
dmxl2	23.1551	0.0915225	0.0618816	1.47899	0.139142	0.842134
rrp9	8.5853	-0.155181	0.104921	-1.47903	0.139133	0.842134
smn1	10.4997	-0.139965	0.0947817	-1.47671	0.139754	0.842134
atad2b	2.44108	0.28228	0.19104	1.4776	0.139516	0.842134
trps1	7.49216	-0.165322	0.111829	-1.47835	0.139313	0.842134
selo	4.76416	-0.209324	0.141773	-1.47647	0.139817	0.842134
bag6	12.4419	-0.127607	0.0861435	-1.48133	0.138518	0.842134
tbc1d19	5.49582	-0.193116	0.130879	-1.47553	0.140069	0.842928
d230017m19rik	1.60795	-0.374429	0.254261	-1.47261	0.140855	0.843073
gm2061	1.86787	0.322704	0.219037	1.47328	0.140674	0.843073
psmd4	41.5252	-0.0694471	0.0470802	-1.47508	0.140191	0.843073
mul1	5.39247	-0.194436	0.131964	-1.47341	0.140641	0.843073
zfp866	2.52738	-0.294705	0.200053	-1.47313	0.140716	0.843073
zfp652os	3.19273	0.250308	0.169832	1.47386	0.14052	0.843073
npas3	12.327	-0.128445	0.0871589	-1.47369	0.140565	0.843073
2010107e04rik	144.741	-0.0370681	0.0251669	-1.47289	0.140781	0.843073
telo2	11.7276	-0.131573	0.089276	-1.47378	0.140541	0.843073
srsf3	124.092	-0.0400337	0.0271768	-1.47308	0.140729	0.843073
tmem179	32.9076	0.0765774	0.052028	1.47185	0.141062	0.843851
entpd2	2.36072	-0.305079	0.207357	-1.47128	0.141216	0.844319
slc18a2	2.41842	-0.301817	0.205199	-1.47085	0.141332	0.844558
slc16a14	1.21866	0.395622	0.269069	1.47033	0.141471	0.844573
b2m	19.6351	0.0982656	0.0668836	1.4692	0.141778	0.844573
zcchc18	43.3077	0.066704	0.0453709	1.4702	0.141509	0.844573
slc7a10	8.55884	-0.211387	0.143884	-1.46915	0.141793	0.844573
rnf126	25.569	0.0868175	0.059093	1.46917	0.141787	0.844573
eef1g	223.042	-0.0297466	0.0202402	-1.46968	0.14165	0.844573
rasgrf2	33.371	0.0755007	0.0514034	1.46879	0.14189	0.844697
elavl3	146.68	0.0363326	0.0247414	1.4685	0.14197	0.844716
ube2l6	1.02647	0.43188	0.294846	1.46477	0.142985	0.845175
ndufs3	52.0653	-0.0615935	0.0420719	-1.464	0.143193	0.845175
tpm3	41.6814	0.0677653	0.0462442	1.46538	0.142818	0.845175
orc3	3.01104	-0.27204	0.18574	-1.46462	0.143024	0.845175
mtmr10	2.02242	-0.330868	0.225634	-1.46639	0.142542	0.845175
bcl7c	11.4672	0.128313	0.0876418	1.46406	0.143177	0.845175
cenpu	2.14342	-0.320745	0.218852	-1.46558	0.142764	0.845175
vps35	29.1522	0.0808508	0.0552245	1.46404	0.143183	0.845175
oxnad1	5.59474	-0.18953	0.129411	-1.46456	0.143041	0.845175
inpp5j	2.36787	0.287541	0.196235	1.46529	0.142841	0.845175
gfap	3.43136	-0.306873	0.209396	-1.46552	0.14278	0.845175
smurf2	3.49745	-0.24077	0.164324	-1.46522	0.142861	0.845175
b230219d22rik	77.3738	0.0497762	0.0339877	1.46453	0.143048	0.845175
zfp414	17.4675	0.104408	0.0712676	1.46501	0.142918	0.845175
nars	29.4517	-0.0821027	0.056064	-1.46445	0.143072	0.845175
ap1ar	13.9981	0.115989	0.0792585	1.46343	0.143351	0.845205
plac8l1	1.20714	0.41864	0.286035	1.4636	0.143304	0.845205
me2	3.25274	0.237699	0.162468	1.46305	0.143453	0.845354
ophn1	6.52039	-0.176425	0.120636	-1.46247	0.143614	0.845673
mterf2	1.42806	-0.394711	0.269925	-1.4623	0.14366	0.845673
dcun1d2	5.71587	-0.189335	0.129514	-1.46189	0.143771	0.845876
fjx1	10.2398	-0.139419	0.095419	-1.46113	0.14398	0.846659
lipt1	1.40728	-0.400385	0.275037	-1.45575	0.145463	0.847387
fam134a	35.8223	-0.0735044	0.0505475	-1.45416	0.145901	0.847387
sp3os	19.1306	-0.101414	0.0698433	-1.45202	0.146495	0.847387
cd44	2.60517	0.273771	0.187615	1.45922	0.144505	0.847387
blvra	10.1105	-0.139855	0.0962916	-1.45241	0.146386	0.847387
1700037h04rik	18.7264	0.10035	0.0688371	1.45778	0.1449	0.847387
upf3b	21.5373	-0.0948742	0.0653947	-1.45079	0.146837	0.847387
las1l	14.1455	-0.118749	0.0813393	-1.45993	0.144311	0.847387
bex4	67.034	0.0530639	0.0364892	1.45423	0.145881	0.847387
intu	1.9786	0.307223	0.210581	1.45893	0.144584	0.847387
cog6	5.20911	0.188242	0.129276	1.45613	0.145357	0.847387
rusc1	18.4068	0.100595	0.0693475	1.45059	0.146894	0.847387
fam214b	8.7328	0.145936	0.100326	1.45462	0.145775	0.847387
coa7	12.102	-0.128469	0.0879915	-1.46002	0.144285	0.847387
zfp512	20.5408	-0.0971447	0.0670342	-1.44918	0.147287	0.847387
mapk10	31.3737	0.0772132	0.0533162	1.44821	0.147557	0.847387
pitpnb	16.6435	0.106066	0.0729483	1.45399	0.145949	0.847387
tnrc18	5.24621	0.186455	0.128206	1.45433	0.145854	0.847387
uspl1	9.3504	0.140439	0.0966587	1.45293	0.146243	0.847387
nup205	2.10832	-0.318536	0.218542	-1.45755	0.144964	0.847387
tmem176a	2.02151	-0.325124	0.223339	-1.45575	0.145463	0.847387
pcgf1	5.4932	-0.19048	0.131045	-1.45355	0.146072	0.847387
pianp	17.4022	0.103835	0.0711951	1.45846	0.144714	0.847387
zc3h4	4.56257	0.199291	0.13726	1.45192	0.146523	0.847387
zfp260	18.1873	-0.103613	0.0715353	-1.44842	0.147499	0.847387
gm37494	1.69371	-0.360745	0.248883	-1.44945	0.147211	0.847387
asphd1	7.65849	0.155959	0.107034	1.45709	0.145091	0.847387
rwdd1	66.7039	0.0532088	0.0366085	1.45345	0.146098	0.847387
cdk19	19.0347	-0.101079	0.0697161	-1.44986	0.147097	0.847387
ascl1	1.66814	-0.372117	0.255018	-1.45918	0.144517	0.847387
pip4k2c	5.45843	-0.190798	0.131749	-1.44819	0.147564	0.847387
mpv17l2	13.5159	-0.120642	0.0830614	-1.45244	0.146379	0.847387
mthfsd	6.36207	0.169459	0.117002	1.44834	0.147521	0.847387
me1	7.62365	0.155697	0.107269	1.45146	0.146651	0.847387
rangrf	10.6398	-0.136401	0.0941696	-1.44846	0.147488	0.847387
armc7	2.58399	-0.2901	0.200104	-1.44975	0.147129	0.847387
cetn3	135.231	-0.0376874	0.0259869	-1.45025	0.14699	0.847387
pik3r1	98.3963	0.0437536	0.0301207	1.45261	0.146332	0.847387
akap5	10.9424	-0.134396	0.0926427	-1.45069	0.146867	0.847387
clec16a	5.00683	0.191459	0.131537	1.45556	0.145516	0.847387
zbtb11os1	4.31687	0.206707	0.141686	1.45891	0.14459	0.847387
donson	1.88933	0.315503	0.21686	1.45487	0.145705	0.847387
mlst8	3.02948	0.244576	0.168035	1.45551	0.145528	0.847387
ppp1r10	7.55344	-0.162539	0.111594	-1.45653	0.145246	0.847387
rpl17	331.066	0.0239595	0.0164961	1.45243	0.146381	0.847387
fth1	1304.83	-0.0120748	0.0083392	-1.44796	0.147628	0.847387
tmem198	14.9151	-0.113999	0.0788131	-1.44644	0.148053	0.847625
cab39	33.3738	-0.0760676	0.0525609	-1.44723	0.147833	0.847625
dr1	10.4403	0.132877	0.0918618	1.44648	0.148042	0.847625
bace1	14.1044	0.114928	0.0794371	1.44678	0.147958	0.847625
chadl	26.2622	0.0841121	0.0581141	1.44736	0.147796	0.847625
ngef	19.8145	0.0965146	0.0669247	1.44214	0.149263	0.848526
tfb2m	4.7196	0.196767	0.136459	1.44196	0.149315	0.848526
h3f3a	247.81	-0.0276772	0.0191833	-1.44278	0.149083	0.848526
cwc22	2.74987	-0.280106	0.194466	-1.44039	0.149757	0.848526
nfs1	7.06771	0.159652	0.110542	1.44427	0.148664	0.848526
fundc1	8.72863	-0.149987	0.103954	-1.44282	0.149072	0.848526
prpf3	2.34682	-0.302214	0.20969	-1.44124	0.149516	0.848526
gm17590	1.88275	0.320163	0.222047	1.44187	0.149339	0.848526
rnf4	30.6443	0.0776728	0.0538872	1.4414	0.149473	0.848526
ppat	3.49138	-0.238579	0.165805	-1.43892	0.150174	0.848526
gm10419	14.2094	0.113794	0.0788926	1.44239	0.149193	0.848526
rnf216	5.50521	-0.18878	0.130669	-1.44472	0.148538	0.848526
naf1	2.7358	0.262454	0.181675	1.44463	0.148562	0.848526
pkn1	2.82103	0.258965	0.179929	1.43927	0.150075	0.848526
gpc6	10.0546	0.134787	0.0934793	1.44189	0.149333	0.848526
rab3d	5.21444	0.187107	0.129913	1.44025	0.149796	0.848526
rab6b	73.5528	0.0502222	0.0349054	1.43881	0.150205	0.848526
mpp3	5.90917	0.175388	0.121725	1.44085	0.149626	0.848526
bphl	10.2576	-0.138377	0.0958559	-1.44359	0.148855	0.848526
arl10	1.40555	-0.396062	0.275043	-1.44	0.149868	0.848526
rrm2	2.1761	0.295214	0.205105	1.43933	0.150057	0.848526
angpt1	1.9856	0.306478	0.212413	1.44284	0.149066	0.848526
tmem184b	3.57748	0.222893	0.154436	1.44327	0.148945	0.848526
abhd16a	14.223	0.113414	0.0788026	1.43921	0.150091	0.848526
fbxw4	3.74127	-0.229762	0.159523	-1.44031	0.14978	0.848526
mt-nd4	983.386	0.0138048	0.00958084	1.44088	0.149619	0.848526
cdk2ap1	2.4027	-0.294414	0.204711	-1.43819	0.150379	0.849079
dtymk	49.8873	0.0608368	0.0423567	1.4363	0.150917	0.849082
sptan1	60.9246	0.0550068	0.0382964	1.43634	0.150904	0.849082
ppp2r2c	66.9465	0.052516	0.0365605	1.43642	0.150884	0.849082
klf3	3.71653	-0.230217	0.160147	-1.43753	0.150566	0.849082
fam160a2	8.19119	0.148708	0.103514	1.4366	0.150831	0.849082
celf6	10.4513	-0.135108	0.094033	-1.43681	0.150772	0.849082
top2a	1.42247	0.511926	0.356292	1.43682	0.15077	0.849082
tmem189	8.26545	0.147728	0.102974	1.43461	0.151397	0.850255
mat2b	33.7748	-0.0747859	0.052126	-1.43471	0.151368	0.850255
pfdn6	52.4176	-0.0601839	0.041955	-1.43449	0.151433	0.850255
a830052d11rik	1.26452	0.378179	0.263565	1.43486	0.151327	0.850255
edem3	3.26031	0.233635	0.162947	1.43381	0.151626	0.850271
scrib	4.0055	-0.220484	0.153792	-1.43365	0.151671	0.850271
fbln1	1.02837	-0.458453	0.319808	-1.43352	0.151708	0.850271
tbcc	7.74543	-0.15764	0.109977	-1.4334	0.151744	0.850271
map9	51.5601	0.0596098	0.0416532	1.4311	0.152402	0.850335
rpl13a	802.288	-0.0152463	0.0106456	-1.43216	0.152097	0.850335
lyrm1	9.9662	0.133984	0.0935872	1.43165	0.152243	0.850335
fus	66.3897	-0.0531785	0.0371592	-1.4311	0.152401	0.850335
nufip2	8.49528	0.145145	0.10143	1.43099	0.152434	0.850335
vezf1	8.54098	-0.149666	0.104469	-1.43263	0.151962	0.850335
psmc1	26.8261	0.0825533	0.057629	1.4325	0.152002	0.850335
rbm4b	41.7891	-0.0671253	0.0469099	-1.43094	0.152447	0.850335
eif1ad	32.3228	0.0751847	0.0524946	1.43224	0.152076	0.850335
sesn2	1.08802	0.408242	0.285405	1.4304	0.152603	0.850541
zdhhc2	42.1446	0.0659398	0.0461029	1.43028	0.152638	0.850541
fndc5	13.86	-0.117306	0.082151	-1.42793	0.153313	0.853261
cdc42ep5	1.67173	-0.356269	0.249471	-1.4281	0.153264	0.853261
thoc5	3.58729	0.223196	0.156324	1.42777	0.153357	0.853261
map4k4	30.5094	0.0767321	0.0538238	1.42562	0.153979	0.854699
nrarp	2.26335	-0.304885	0.213882	-1.42548	0.154018	0.854699
hspa4l	22.0574	-0.0920432	0.0646161	-1.42446	0.154313	0.854699
nr2f6	9.10499	0.13998	0.0981604	1.42603	0.15386	0.854699
pcnxl4	5.31674	0.182794	0.128363	1.42404	0.154435	0.854699
1500009c09rik	64.5126	-0.0536631	0.0376814	-1.42413	0.15441	0.854699
zdhhc8	7.54233	0.153386	0.107713	1.42403	0.154437	0.854699
gm8186	7.7195	-0.158343	0.1111	-1.42523	0.154091	0.854699
kdm5d	3.95125	-0.219548	0.154184	-1.42393	0.154466	0.854699
1700086o06rik	5.72273	0.176142	0.123699	1.42396	0.154459	0.854699
ppic	1.18372	-0.452055	0.317256	-1.42489	0.154189	0.854699
[truncated: 9,062 more rows]

## Sheet: 3. P4_L4_septa_vs_hollow_DEG
Gene	avg_log2FC	pct.1	pct.2	p_val	p_val_adj	Pattern	Clustering gene
Gap43	0.863121	1	1	7.33757e-57	9.25635e-53	Septa	YES
Rgs4	0.971034	0.025	0.535	1.67445e-48	2.11232e-44	Septa	YES
Ddah1	0.921095	0.03	0.519	6.90267e-46	8.70771e-42
Tsc22d1	-0.783584	1	0.984	7.23835e-41	9.13118e-37
Cpne8	0.769455	0.058	0.527	4.31572e-40	5.44428e-36
Rorb	-1.20258	0.841	0.354	5.97084e-40	7.53221e-36
Dbp	-0.85822	0.745	0.247	1.74533e-36	2.20173e-32	Hollow	YES
Ncald	0.850759	0.496	0.877	5.631e-35	7.1035e-31	Septa	YES
Crip2	0.634422	0.981	1	2.2592e-33	2.84998e-29
Arl4a	-0.771892	0.962	0.782	2.16192e-31	2.72726e-27	Hollow
Id2	1.29465	0.304	0.708	3.83161e-31	4.83358e-27
Syt4	-0.771041	0.997	0.881	9.57187e-31	1.20749e-26
Nrsn1	-0.847997	0.849	0.469	6.84269e-28	8.63205e-24
Hccs	-1.30565	0.729	0.362	3.20702e-27	4.04565e-23
Tppp3	0.50216	0.099	0.473	5.19645e-26	6.55533e-22	Septa	YES
Ndufa5	-0.673912	0.962	0.815	2.27724e-25	2.87274e-21
1700086L19Rik	0.599707	0.181	0.576	1.21364e-24	1.531e-20
Tubb2b	0.463037	1	1	6.50205e-24	8.20234e-20	Septa
Sema7a	-0.708021	0.66	0.288	1.12388e-23	1.41777e-19	Hollow	YES
Sncb	-0.638665	0.964	0.889	2.05107e-23	2.58742e-19
Plk2	-0.738335	0.956	0.835	2.36381e-23	2.98194e-19
Map1b	0.432352	1	1	4.16272e-23	5.25127e-19	Septa
Prss12	0.52091	0.041	0.333	9.47383e-23	1.19512e-18
Npy	0.931852	0.09	0.416	1.03006e-22	1.29942e-18
Met	0.409402	0.038	0.329	2.42639e-22	3.06089e-18	Septa	YES
Neurod6	0.64123	0.512	0.831	3.09862e-22	3.90891e-18
Pde8b	-0.538591	0.444	0.086	1.64376e-21	2.0736e-17	Hollow	YES
Fdps	0.644656	0.592	0.86	1.69209e-21	2.13457e-17
Tmsb4x	0.321549	1	1	6.08881e-21	7.68103e-17
Pcdh17	0.424211	0.027	0.288	8.09079e-21	1.02065e-16
Sox4	-0.540368	0.992	0.93	8.84521e-21	1.11582e-16
Usp2	-0.505318	0.433	0.086	2.13096e-20	2.6882e-16	Hollow	YES
A830029E22Rik	0.327022	0.014	0.243	1.90357e-19	2.40135e-15
Acat2	0.618606	0.589	0.86	2.30596e-19	2.90896e-15
Tubb5	0.374282	1	1	6.13788e-19	7.74293e-15
Ddah2	0.530357	0.329	0.658	3.93636e-18	4.96571e-14
Rac3	0.453791	0.948	0.996	5.38084e-18	6.78794e-14	Septa
Nrgn	0.664796	0.896	0.951	6.81703e-18	8.59968e-14
Klf9	-0.578928	0.882	0.712	1.55408e-17	1.96048e-13
Tuba1a	0.308609	1	1	3.54295e-17	4.46943e-13
App	-0.651465	0.874	0.695	4.14847e-17	5.23329e-13
Lypd1	0.476931	0.068	0.317	2.67511e-16	3.37465e-12	Septa	YES
Gabra5	0.555358	0.31	0.597	3.9106e-16	4.93322e-12
H3f3b	-0.331715	1	1	4.02441e-16	5.0768e-12
Gucy1a3	0.533991	0.384	0.679	6.01422e-16	7.58694e-12
Hmgcr	0.488536	0.367	0.683	1.08683e-15	1.37103e-11
Dbpht2	0.465689	0.203	0.502	1.19194e-15	1.50363e-11
Cd24a	0.41655	0.978	1	2.67187e-15	3.37056e-11	Septa	YES
mt-Co1	-0.280595	1	1	4.96467e-15	6.26293e-11
Rpl22l1	0.5245	0.784	0.947	6.58613e-15	8.3084e-11
Tpd52	0.378719	0.17	0.461	6.67913e-15	8.42572e-11
Rpl41	0.283167	1	1	6.98017e-15	8.80548e-11
Cnih2	0.358619	0.997	1	1.42612e-14	1.79905e-10
Ak5	0.298241	0.063	0.296	2.40587e-14	3.035e-10
Barx2	-0.470584	0.468	0.177	2.69888e-14	3.40464e-10	Hollow	YES
Atp1b1	-0.4397	0.981	0.942	3.22581e-14	4.06936e-10
Fabp5	0.428819	0.921	0.979	4.64722e-14	5.86247e-10
Cfl1	0.299567	1	1	6.985e-14	8.81158e-10
Nnmt	0.291836	0.022	0.202	7.64926e-14	9.64954e-10
Efnb3	0.400527	0.159	0.424	8.95916e-14	1.1302e-09	Septa	YES
Rgma	0.318623	0.044	0.247	1.02756e-13	1.29627e-09
Mif	0.398065	0.997	1	2.53747e-13	3.20101e-09
Tcf4	-0.396873	1	0.959	2.56961e-13	3.24156e-09
Macrod2	0.462432	0.504	0.745	2.71796e-13	3.42871e-09
Tuba1b	0.431277	0.932	0.988	2.95811e-13	3.73166e-09
Neto2	0.362787	0.121	0.362	3.08659e-13	3.89373e-09
1700001L19Rik	0.391276	0.121	0.358	3.53715e-13	4.46211e-09
Ap1s1	0.458264	0.523	0.77	4.3514e-13	5.48929e-09
Brinp1	-0.490043	0.762	0.56	4.37041e-13	5.51327e-09	Hollow
Nipsnap3b	0.35822	0.205	0.486	4.52773e-13	5.71173e-09
Sox11	0.516922	0.715	0.868	5.49727e-13	6.9348e-09
Tgfbr1	-0.419892	0.54	0.251	5.5039e-13	6.94316e-09	Hollow	YES
RP23-407N2.2	0.337859	0.06	0.267	5.75017e-13	7.25384e-09
Tenm1	0.383098	0.148	0.395	6.92926e-13	8.74126e-09	Septa	YES
Frzb	0.312318	0.019	0.185	8.1119e-13	1.02332e-08
Nefl	0.327789	0.016	0.177	8.86252e-13	1.11801e-08
Hmgcs1	0.462385	0.844	0.918	9.33427e-13	1.17752e-08
Nr1d1	-0.400259	0.414	0.144	1.03792e-12	1.30934e-08	Hollow	YES
Lmo4	0.58694	0.211	0.453	1.18101e-12	1.48984e-08
Cpne4	0.371551	0.112	0.346	1.22066e-12	1.53986e-08
Neurod2	-0.508438	0.83	0.72	1.28279e-12	1.61824e-08
Rala	0.458784	0.786	0.93	1.42934e-12	1.80312e-08
Osbpl1a	-0.437536	0.984	0.909	1.62585e-12	2.05101e-08
Csrp2	0.394295	0.23	0.506	1.82274e-12	2.29939e-08
Pde1a	0.363336	0.079	0.292	1.8723e-12	2.36191e-08
2900055J20Rik	-0.512596	0.803	0.634	1.97596e-12	2.49268e-08
Gnb4	0.369539	0.334	0.626	2.28949e-12	2.88819e-08
Akap7	0.388286	0.499	0.757	2.37572e-12	2.99697e-08
Klhl1	0.323906	0.049	0.239	2.53725e-12	3.20074e-08
Akr1c19	0.26032	0.055	0.251	2.74729e-12	3.46571e-08
Cux2	-0.771397	0.707	0.49	2.8456e-12	3.58973e-08
Pcdh8	0.294984	0.066	0.272	3.01425e-12	3.80247e-08
Fam163a	-0.32185	0.244	0.033	3.76288e-12	4.74688e-08
Rps14	-0.254105	1	1	4.22285e-12	5.32713e-08
Pfn2	0.370933	0.94	0.971	4.87878e-12	6.15458e-08
Minar1	-0.304403	0.268	0.049	5.21068e-12	6.57328e-08	Hollow	YES
Uchl3	0.383031	0.578	0.823	5.9639e-12	7.52346e-08
Msx3	-0.407626	0.312	0.078	6.82139e-12	8.60518e-08
Rab3b	0.439245	0.271	0.519	6.93914e-12	8.75372e-08
Khdrbs3	0.322484	0.096	0.313	8.20141e-12	1.03461e-07
Rtn1	-0.322	1	1	9.35422e-12	1.18004e-07
Cck	0.628228	0.605	0.778	1.55048e-11	1.95593e-07
Actg1	0.298655	1	1	1.67233e-11	2.10965e-07
Sms	0.443122	0.534	0.765	1.80957e-11	2.28277e-07
Ykt6	0.37344	0.521	0.765	1.81515e-11	2.28981e-07
Trim2	0.382298	0.397	0.654	2.07403e-11	2.61639e-07
Bex1	0.442461	0.69	0.848	2.42423e-11	3.05816e-07
Rasgrp2	0.360169	0.274	0.535	2.43866e-11	3.07636e-07
Rbfox3	-0.397745	0.956	0.856	2.91619e-11	3.67878e-07
Mvd	0.35974	0.304	0.56	3.34379e-11	4.21819e-07
Edil3	0.265012	0.038	0.206	3.66444e-11	4.62269e-07
Tmsb10	0.218303	1	1	3.9128e-11	4.936e-07
Dzip3	0.297802	0.159	0.395	4.1693e-11	5.25958e-07
S100a10	0.58694	0.332	0.564	4.46073e-11	5.62721e-07
Plxnd1	-0.310905	0.255	0.049	4.6504e-11	5.86648e-07	Hollow	YES
Pcdh19	0.285202	0.101	0.313	6.28001e-11	7.92223e-07	Septa	YES
Lrfn5	0.361295	0.315	0.58	6.57029e-11	8.28842e-07
Gnai1	0.420796	0.334	0.576	6.94772e-11	8.76455e-07
Bex2	0.314247	1	0.992	7.78654e-11	9.82272e-07
Chd3	0.379648	0.625	0.872	9.07799e-11	1.14519e-06
Esd	0.36023	0.288	0.547	1.00212e-10	1.26417e-06
Lrrtm3	0.262249	0.058	0.239	1.01312e-10	1.27805e-06
Ccdc184	0.34123	0.192	0.428	1.14597e-10	1.44564e-06
Mpp6	0.326746	0.107	0.309	1.31521e-10	1.65914e-06
Cmas	0.324367	0.479	0.733	1.60217e-10	2.02114e-06
Dok5	0.384981	0.693	0.864	1.88311e-10	2.37554e-06
Vsnl1	-0.431167	0.879	0.761	1.94389e-10	2.45222e-06
Sh3bgrl3	0.358499	0.877	0.979	1.99466e-10	2.51626e-06
Cdo1	0.376281	0.214	0.436	2.29764e-10	2.89847e-06
Serf1	0.36802	0.948	0.984	2.42402e-10	3.05791e-06
Khdrbs2	0.395195	0.222	0.449	2.6314e-10	3.31951e-06
Ppp1r14b	0.381245	0.458	0.675	2.6766e-10	3.37653e-06
Ube2e2	-0.455809	0.808	0.65	2.8434e-10	3.58694e-06
Snx8	0.230339	0.038	0.193	3.77676e-10	4.76439e-06
Tubb3	0.271882	1	1	3.82021e-10	4.8192e-06	Septa
Luzp2	0.323906	0.134	0.342	5.06765e-10	6.39284e-06
Dpysl5	0.345122	0.515	0.765	6.50391e-10	8.20468e-06	Septa
Lrrc73	0.322129	0.501	0.774	7.03826e-10	8.87877e-06
Pafah1b3	0.370591	0.534	0.786	7.9616e-10	1.00436e-05
Ank3	-0.433157	0.789	0.621	8.736e-10	1.10205e-05
Smarcd3	0.347113	0.408	0.63	8.90683e-10	1.1236e-05
Chst1	0.372317	0.247	0.461	9.19782e-10	1.16031e-05
Pfdn4	0.339592	0.496	0.728	9.67203e-10	1.22013e-05
Gria1	0.261364	0.079	0.259	1.07253e-09	1.353e-05
Stx6	0.306181	0.277	0.51	1.13258e-09	1.42875e-05
Cacng4	0.299777	0.121	0.317	1.14466e-09	1.44398e-05
Hmgn3	0.357041	0.655	0.852	1.2053e-09	1.52049e-05
Fam131c	0.293317	0.151	0.362	1.26033e-09	1.58991e-05
Calm3	0.34134	0.907	0.963	1.28727e-09	1.62389e-05
Scg2	0.37295	0.14	0.346	1.29816e-09	1.63763e-05
Srebf2	0.266741	0.132	0.337	1.30628e-09	1.64788e-05
Znhit1	0.360664	0.553	0.761	1.38027e-09	1.74121e-05
Sod1	0.330908	0.616	0.852	1.4146e-09	1.78452e-05
Enc1	0.376261	0.562	0.798	1.49966e-09	1.89182e-05	Septa
Tmem167	0.333284	0.397	0.63	1.59466e-09	2.01167e-05
Pak6	0.320339	0.282	0.51	1.78191e-09	2.24788e-05
1810037I17Rik	0.39767	0.49	0.683	2.03741e-09	2.57019e-05
Cdh13	0.234803	0.025	0.156	2.04562e-09	2.58055e-05
Fdft1	0.400319	0.575	0.79	2.27121e-09	2.86513e-05
Rgs13	-0.375808	0.225	0.049	2.29773e-09	2.89859e-05
Dtx4	0.307062	0.189	0.407	2.47923e-09	3.12755e-05
Ptpn5	0.29712	0.31	0.551	2.50855e-09	3.16453e-05
Bbc3	0.294984	0.323	0.58	2.5093e-09	3.16549e-05
Sh3glb1	0.321046	0.493	0.724	2.61993e-09	3.30505e-05
Neo1	0.308767	0.268	0.494	3.06698e-09	3.86899e-05
Rgs17	0.365037	0.31	0.519	3.2077e-09	4.04651e-05
Fasn	0.322217	0.315	0.547	3.39996e-09	4.28905e-05
Pkia	0.338442	0.644	0.868	3.42604e-09	4.32195e-05	Septa	YES
Impdh1	0.322742	0.304	0.535	3.52414e-09	4.4457e-05
Necab1	0.3481	0.381	0.609	3.8189e-09	4.81755e-05
Fndc4	0.31531	0.455	0.7	4.15092e-09	5.23638e-05
Cacng3	0.16141	0.008	0.115	4.23049e-09	5.33676e-05
Ubb	-0.218288	1	1	4.32787e-09	5.45961e-05
Nell1	-0.24705	0.203	0.037	5.65781e-09	7.13733e-05
mt-Nd4	-0.220268	1	1	5.80382e-09	7.32152e-05
Stau2	0.292542	0.392	0.65	6.1791e-09	7.79494e-05
Mapk3	0.339702	0.51	0.724	7.37328e-09	9.3014e-05
Rgs10	0.273677	0.118	0.305	7.63906e-09	9.63668e-05
Celf3	0.306018	0.463	0.712	8.06499e-09	0.00010174
Ypel3	-0.347136	0.888	0.848	8.54169e-09	0.000107753
Scg5	-0.40589	0.893	0.84	8.57374e-09	0.000108158
Tmem191c	-0.403298	0.789	0.679	8.85941e-09	0.000111761
Cetn2	0.307886	0.271	0.494	9.59366e-09	0.000121024
Nudt21	0.326149	0.337	0.556	1.01522e-08	0.00012807
Camkv	-0.369093	0.871	0.774	1.1097e-08	0.000139989
Ensa	0.295944	0.529	0.741	1.17648e-08	0.000148413
Dynll1	0.237175	1	1	1.22463e-08	0.000154487
Adss	0.286661	0.233	0.449	1.29136e-08	0.000162905
Anks1b	0.296005	0.2	0.403	1.35051e-08	0.000170367
Ssbp2	0.330855	0.63	0.84	1.36257e-08	0.000171888
Carhsp1	0.346507	0.203	0.407	1.38541e-08	0.000174769
Eif3a	0.341257	0.414	0.626	1.40637e-08	0.000177413
Bad	0.283871	0.422	0.654	1.44093e-08	0.000181774
Sptbn2	0.311448	0.362	0.584	1.44167e-08	0.000181867
Cryab	-0.432622	0.362	0.16	1.47336e-08	0.000185865
Wdr1	0.322019	0.216	0.424	1.55914e-08	0.000196686
Fbxl17	0.237356	0.077	0.239	1.56297e-08	0.000197169
Cav1	0.183584	0.011	0.115	1.62414e-08	0.000204885
Nat14	0.286927	0.279	0.502	1.68097e-08	0.000212055
Cox6a2	-0.35605	0.285	0.099	1.68964e-08	0.000213148
Ppp1r16b	-0.402022	0.474	0.267	1.80826e-08	0.000228111
Gadd45b	0.238678	0.06	0.21	1.874e-08	0.000236405
Ddx25	0.290808	0.277	0.498	1.87656e-08	0.000236727
Cyb561d2	0.239921	0.167	0.37	2.17941e-08	0.000274933
Elmo1	0.240702	0.063	0.214	2.25779e-08	0.00028482
Hint1	0.248435	0.997	0.992	2.39595e-08	0.000302249
Cux1	-0.370123	0.893	0.807	2.48384e-08	0.000313336
Gng4	0.264119	0.099	0.267	2.62767e-08	0.000331481
Gatm	0.318085	0.2	0.395	2.78954e-08	0.0003519
Eif3m	0.271061	0.436	0.671	2.93499e-08	0.000370249
Drap1	0.311306	0.408	0.621	2.94265e-08	0.000371216
Gpm6b	-0.325772	0.921	0.84	3.2673e-08	0.00041217
Gpr22	0.232694	0.074	0.23	3.32486e-08	0.000419431
Rap2b	0.288599	0.214	0.416	3.59698e-08	0.000453759
Commd1	0.285416	0.312	0.531	3.66236e-08	0.000462006
Gnaz	0.335727	0.504	0.712	3.68595e-08	0.000464982
Ttl	0.299138	0.414	0.626	3.7692e-08	0.000475485
Pgrmc1	0.293601	0.562	0.778	4.0532e-08	0.000511312
Gnb2	0.242126	0.992	0.992	4.06896e-08	0.000513299
Ldlrad3	0.160189	0.016	0.123	4.22665e-08	0.000533191
Tmem108	0.314042	0.29	0.506	4.26602e-08	0.000538159
Lypla2	0.257399	0.26	0.469	5.58431e-08	0.000704461
Tbc1d16	0.276725	0.227	0.432	5.7588e-08	0.000726472
Guk1	0.30929	0.605	0.802	5.87468e-08	0.000741091
Shisa9	0.126523	0.003	0.086	6.3719e-08	0.000803815
Gda	0.292428	0.115	0.284	6.86895e-08	0.000866517
Tmem160	0.333538	0.496	0.679	7.94039e-08	0.00100168
Pde10a	0.250657	0.101	0.263	8.40142e-08	0.00105984
Rasl10a	-0.343158	0.392	0.198	8.52298e-08	0.00107517	Hollow	YES
Rexo2	0.304097	0.326	0.535	8.65158e-08	0.0010914
Fam124a	0.282683	0.403	0.621	8.89009e-08	0.00112148
Cstb	0.262028	0.452	0.683	8.95659e-08	0.00112987
Per3	-0.206388	0.175	0.033	9.65239e-08	0.00121765	Hollow	YES
Sin3b	0.279839	0.466	0.679	9.71438e-08	0.00122547
Rras2	0.260534	0.274	0.486	9.72663e-08	0.00122701
Lmo1	0.219455	0.036	0.156	1.0528e-07	0.0013281
Fzr1	0.286728	0.323	0.531	1.05405e-07	0.00132969
Anxa7	0.197633	0.066	0.21	1.05652e-07	0.0013328
Kpna3	0.256149	0.195	0.391	1.06402e-07	0.00134227
Phf24	0.269059	0.197	0.387	1.08392e-07	0.00136737
Rimklb	0.272464	0.342	0.56	1.21558e-07	0.00153345
Vat1l	0.14857	0.025	0.136	1.23125e-07	0.00155323
Smap2	0.239647	0.132	0.305	1.23459e-07	0.00155744
Plpp1	0.244736	0.121	0.288	1.3132e-07	0.0016566
Ccdc30	0.145007	0.03	0.148	1.32021e-07	0.00166544
Gcat	0.190234	0.066	0.21	1.4028e-07	0.00176963
Stc1	0.15765	0.019	0.123	1.43167e-07	0.00180605
Hlf	-0.225127	0.233	0.07	1.50244e-07	0.00189532	Hollow	YES
Rtca	0.241662	0.397	0.617	1.53238e-07	0.0019331
Morn4	0.265012	0.241	0.44	1.58455e-07	0.00199891
Sae1	0.259679	0.381	0.597	1.59873e-07	0.0020168
Ube2i	0.310797	0.463	0.654	1.6307e-07	0.00205712
Plcxd3	0.197258	0.03	0.144	1.65318e-07	0.00208549
Ndrg3	-0.332192	0.781	0.712	1.77817e-07	0.00224316
Usp22	0.308984	0.488	0.683	1.81295e-07	0.00228704
Sdc3	0.295174	0.29	0.486	1.83243e-07	0.00231161
Mpped1	0.33231	0.718	0.844	1.85081e-07	0.0023348
Eif1ax	0.296963	0.575	0.757	1.90112e-07	0.00239826
Vti1b	0.263335	0.726	0.877	1.96872e-07	0.00248354
Dnajc2	0.249245	0.233	0.428	2.0498e-07	0.00258582
Dhx15	0.249545	0.148	0.321	2.13839e-07	0.00269758
Ywhaz	0.295828	0.671	0.831	2.236e-07	0.00282071
Tfg	0.280051	0.323	0.514	2.26939e-07	0.00286283
Rora	-0.283292	0.315	0.136	2.28647e-07	0.00288438
Arhgef28	0.190234	0.066	0.206	2.43638e-07	0.0030735
Prmt2	0.276512	0.51	0.724	2.4553e-07	0.00309736
Eny2	0.279936	0.386	0.597	2.47472e-07	0.00312186
Caln1	-0.39336	0.797	0.695	2.52864e-07	0.00318988
Dlgap1	0.28377	0.375	0.584	2.56778e-07	0.00323925
Grcc10	0.283012	0.233	0.416	2.59324e-07	0.00327137
Rpl18a	-0.212562	1	1	2.65484e-07	0.00334908
Lcorl	0.242575	0.107	0.263	2.66286e-07	0.0033592
Scn3b	0.249389	0.178	0.362	2.76255e-07	0.00348496
mt-Atp6	-0.133328	1	1	2.78586e-07	0.00351437
Unc119	0.313922	0.301	0.486	2.85007e-07	0.00359536
Nudt16l1	0.255531	0.222	0.412	2.90339e-07	0.00366262
Palm	0.301603	0.575	0.761	2.90844e-07	0.003669
Bex4	0.308163	0.611	0.774	3.01796e-07	0.00380716
Rpl22	0.30406	0.74	0.885	3.02863e-07	0.00382062
Rph3a	0.0975553	0	0.07	3.04994e-07	0.00384749
Pak3	0.29115	0.427	0.654	3.06764e-07	0.00386983
mt-Co2	-0.17878	1	1	3.07533e-07	0.00387953
Doc2a	0.288519	0.279	0.473	3.13498e-07	0.00395478
Rpl39	0.324636	0.852	0.926	3.1682e-07	0.00399669
C1d	0.266025	0.586	0.786	3.39559e-07	0.00428354
Dpysl3	0.235561	1	1	3.45582e-07	0.00435951	Septa
Slc35f4	-0.308504	0.485	0.288	3.52529e-07	0.00444716
Erc1	0.254827	0.222	0.416	3.53272e-07	0.00445652
Enpp2	0.176956	0.041	0.16	3.67625e-07	0.00463759
Ubac1	0.250721	0.375	0.597	3.75405e-07	0.00473573
1810022K09Rik	0.275184	0.351	0.564	3.75898e-07	0.00474195
Txndc17	0.302673	0.652	0.819	3.83462e-07	0.00483737
Srsf6	0.295561	0.351	0.531	3.89404e-07	0.00491234
Mea1	0.299302	0.586	0.753	4.06506e-07	0.00512808
Srgap1	0.203293	0.074	0.214	4.31138e-07	0.00543881
Tspan5	0.286281	0.471	0.658	4.3244e-07	0.00545523
Klf2	0.211241	0.096	0.251	4.41864e-07	0.00557412
Camk1	0.264492	0.562	0.77	4.42053e-07	0.0055765
St6gal2	0.202675	0.099	0.251	4.43351e-07	0.00559288
Bzw2	0.329049	0.575	0.737	4.49148e-07	0.005666
Vcan	0.179516	0.033	0.144	4.53608e-07	0.00572226
Tmem29	0.236362	0.195	0.379	4.75663e-07	0.00600048
Fnbp1l	0.294942	0.526	0.695	4.78864e-07	0.00604087
Eif4a2	-0.24705	0.967	0.926	4.99982e-07	0.00630727
Mturn	0.308476	0.411	0.605	5.18576e-07	0.00654183
Trappc4	0.301186	0.74	0.868	5.25053e-07	0.00662355
Map4	0.302165	0.433	0.634	5.25859e-07	0.00663372
Apba2	0.263051	0.389	0.597	5.26363e-07	0.00664007
Stk32c	0.195515	0.096	0.247	5.4469e-07	0.00687126
Rnf126	0.249625	0.362	0.576	5.5933e-07	0.00705595
Ppp1r9a	0.217437	0.189	0.374	5.60099e-07	0.00706564
Cdkn2d	0.231736	0.471	0.695	5.62043e-07	0.00709017
Stmn3	0.213988	1	1	5.85987e-07	0.00739222
Nim1k	-0.284455	0.375	0.185	5.88166e-07	0.00741971
Tbcb	0.306832	0.808	0.897	6.05487e-07	0.00763822
Cadm1	0.272917	0.208	0.387	6.12911e-07	0.00773187
Tbca	0.289446	0.841	0.93	6.22331e-07	0.0078507
Ahsa2	0.272607	0.362	0.547	6.48045e-07	0.00817509
Csk	0.24668	0.296	0.494	6.54364e-07	0.0082548
Rnd1	0.256087	0.337	0.543	6.76594e-07	0.00853524
Fkbp1b	-0.326272	0.858	0.774	6.77853e-07	0.00855111
Pdrg1	0.273587	0.532	0.737	6.93256e-07	0.00874543
Tpd52l1	0.131371	0.019	0.115	6.93568e-07	0.00874936
Pdlim7	0.267959	0.282	0.477	7.11161e-07	0.00897129
Dfna5	0.285346	0.367	0.564	7.63185e-07	0.00962758
Limk2	0.229784	0.211	0.395	7.81215e-07	0.00985503
Zfp580	0.274035	0.351	0.543	7.89803e-07	0.00996337
Ncbp2	0.224798	0.249	0.444	7.9631e-07	0.0100455
Gdi2	0.299138	0.611	0.774	8.10391e-07	0.0102231
Inpp5f	0.242986	0.222	0.407	8.30614e-07	0.0104782
A830018L16Rik	0.27634	0.195	0.366	8.51913e-07	0.0107469
Rgs2	-0.363307	0.507	0.317	8.83341e-07	0.0111433
Acot7	0.318638	0.699	0.848	8.87364e-07	0.0111941
Bola2	0.257267	0.452	0.671	8.90166e-07	0.0112294
Tmtc4	0.240571	0.296	0.494	9.05713e-07	0.0114256
Ttc27	0.175665	0.047	0.165	9.33148e-07	0.0117717
Rhbdd2	0.170672	0.068	0.202	9.4223e-07	0.0118862
Polr2g	0.261483	0.468	0.663	9.76657e-07	0.0123205
Gipc1	0.268934	0.403	0.593	9.8525e-07	0.0124289
Sec23a	0.249359	0.403	0.605	9.96774e-07	0.0125743
mt-Cytb	-0.149802	1	1	1.01153e-06	0.0127605
Rpl10a	0.241918	0.967	0.984	1.05115e-06	0.0132602
Jph4	0.238045	0.356	0.56	1.05256e-06	0.013278
Dph3	0.267844	0.329	0.514	1.07316e-06	0.013538
Rab11a	0.279874	0.704	0.86	1.09447e-06	0.0138067
Dstn	0.290382	0.816	0.93	1.09878e-06	0.0138611
Sorl1	0.143639	0.033	0.14	1.10284e-06	0.0139123	Septa
Npm1	0.294158	0.745	0.856	1.11421e-06	0.0140557
Smarca2	0.261204	0.389	0.584	1.15506e-06	0.0145711
Srsf2	0.239017	0.614	0.807	1.1551e-06	0.0145715
Gng5	0.280442	0.238	0.412	1.16305e-06	0.0146719
Dctpp1	0.292981	0.496	0.658	1.18674e-06	0.0149708
Rnf41	0.236591	0.26	0.449	1.18989e-06	0.0150104
Chn1	0.22437	0.389	0.613	1.19999e-06	0.0151379
Vegfb	0.245489	0.233	0.416	1.23943e-06	0.0156354
Fam81a	0.205179	0.093	0.235	1.25081e-06	0.015779
Idi1	0.260034	0.307	0.498	1.28015e-06	0.0161491
Stmn2	0.174228	1	1	1.31037e-06	0.0165303
Ndp	0.17701	0.03	0.132	1.40261e-06	0.0176939
Rwdd1	0.258798	0.573	0.761	1.43121e-06	0.0180548
Spg21	0.244118	0.375	0.568	1.60395e-06	0.0202338
Hsd17b7	0.168071	0.033	0.136	1.75335e-06	0.0221185
Dusp6	0.254062	0.329	0.531	1.8579e-06	0.0234374
Fam174b	0.264274	0.282	0.457	1.88989e-06	0.023841
Kcnn2	0.143938	0.044	0.156	1.98169e-06	0.0249991
Msmo1	0.282905	0.466	0.654	2.06714e-06	0.0260769
Cttnbp2	-0.345761	0.578	0.416	2.0712e-06	0.0261282
Wnk3	0.123127	0.016	0.103	2.08171e-06	0.0262608
Smyd2	0.256792	0.43	0.617	2.08311e-06	0.0262785
1700025G04Rik	0.194201	0.153	0.317	2.13686e-06	0.0269565
Rsph9	0.219635	0.17	0.337	2.1384e-06	0.026976
Rufy3	0.231459	0.575	0.778	2.2118e-06	0.0279018
Atpif1	0.192728	1	1	2.24619e-06	0.0283357
Ube2j1	0.236998	0.222	0.395	2.35327e-06	0.0296865
Klf6	0.229007	0.537	0.728	2.35743e-06	0.029739
Mthfd2	0.192464	0.123	0.276	2.39635e-06	0.0302299
Mtch1	0.280722	0.564	0.753	2.41259e-06	0.0304348
Prep	0.175626	0.06	0.181	2.43711e-06	0.0307442
Hypk	0.240209	0.523	0.728	2.48973e-06	0.0314079
Brox	0.197312	0.236	0.424	2.52069e-06	0.0317984
Nipa1	0.209825	0.126	0.276	2.56477e-06	0.0323546
Tmem183a	0.261237	0.414	0.601	2.57221e-06	0.0324485
Adipor1	0.251539	0.332	0.51	2.60294e-06	0.0328361
Arl5a	0.215799	0.118	0.263	2.62895e-06	0.0331642
Lrrtm4	0.173138	0.06	0.181	2.69901e-06	0.0340481
Smim12	0.249905	0.279	0.457	2.70076e-06	0.0340701
Vamp4	0.247046	0.312	0.49	2.72426e-06	0.0343665
Evl	0.270174	0.858	0.938	2.72652e-06	0.034395
Rps15a	0.235514	0.992	0.988	2.73715e-06	0.0345291
Ubl7	-0.359655	0.614	0.481	2.77369e-06	0.03499
Srgap2	0.249905	0.173	0.329	2.89156e-06	0.0364771
Gfer	0.17661	0.112	0.259	2.9315e-06	0.0369808
Eif1a	0.229018	0.271	0.453	2.94245e-06	0.037119
Tmem120a	0.221008	0.282	0.469	2.95846e-06	0.0373209
Prmt7	0.229679	0.23	0.407	2.96313e-06	0.0373799
Pgm2l1	0.225416	0.444	0.63	2.97526e-06	0.0375329
Plb1	-0.237111	0.238	0.091	2.98305e-06	0.0376311
Arhgef12	0.19887	0.14	0.296	2.99141e-06	0.0377367
Gnai2	0.237562	0.208	0.374	2.9926e-06	0.0377517
Rab3a	-0.241681	0.995	0.971	3.03864e-06	0.0383324
Ankrd12	-0.278645	0.926	0.864	3.13025e-06	0.0394881
Cnih1	0.22437	0.205	0.379	3.17457e-06	0.0400472
Tusc3	0.256876	0.279	0.465	3.18567e-06	0.0401872
Ap3s1	0.246131	0.701	0.852	3.23556e-06	0.0408165
Chl1	0.27799	0.43	0.601	3.24457e-06	0.0409303	Septa
Gabrb3	0.265012	0.282	0.449	3.24958e-06	0.0409935
Meaf6	0.200758	0.348	0.547	3.28696e-06	0.041465
Chchd4	0.256415	0.392	0.572	3.29686e-06	0.0415898
Rprm	0.400527	0.2	0.354	3.3077e-06	0.0417267
Gm1673	0.234203	0.959	0.992	3.32157e-06	0.0419016
Wdr4	0.181585	0.079	0.21	3.33946e-06	0.0421273
Tmem158	-0.3237	0.852	0.811	3.34625e-06	0.0422129
Rhoa	0.249439	0.288	0.457	3.39036e-06	0.0427693
Cwh43	0.0952099	0.005	0.074	3.47672e-06	0.0438589
Fgf10	0.0864148	0	0.058	3.57566e-06	0.045107
Psme2	0.225119	0.373	0.572	3.59384e-06	0.0453363
Tsta3	0.216649	0.219	0.391	3.61887e-06	0.0456521
Mapre2	0.254971	0.655	0.802	3.63938e-06	0.0459108
Epb41l1	0.2064	0.148	0.305	3.72541e-06	0.046996
Gtpbp6	0.217184	0.219	0.391	3.74846e-06	0.0472869
Rnft2	0.194623	0.093	0.226	3.80963e-06	0.0480585
Arxes2	0.2463	0.282	0.453	4.01016e-06	0.0505882
Tcp1	0.262622	0.641	0.794	4.01168e-06	0.0506074
Fat3	-0.280523	0.436	0.255	4.01651e-06	0.0506683
Snx10	0.245204	0.405	0.576	4.09165e-06	0.0516161
Dtymk	0.221828	0.381	0.58	4.09482e-06	0.0516561
Gpc6	0.0896717	0.003	0.066	4.10561e-06	0.0517923
Farp1	0.226765	0.17	0.325	4.10762e-06	0.0518176
Mblac2	0.223057	0.247	0.424	4.14477e-06	0.0522863
Arl2	0.217833	0.258	0.44	4.23307e-06	0.0534002
Rap2a	0.192661	0.121	0.267	4.33504e-06	0.0546865
5031439G07Rik	0.203913	0.132	0.28	4.34861e-06	0.0548578
Idh1	0.285159	0.644	0.807	4.40742e-06	0.0555996
Dab1	0.25923	0.49	0.667	4.44281e-06	0.0560461
Fam117b	0.204965	0.129	0.276	4.52731e-06	0.0571121
2610001J05Rik	0.315765	0.622	0.79	4.53589e-06	0.0572202
Prkra	0.229751	0.288	0.477	4.54166e-06	0.0572931
Camk4	0.256172	0.337	0.523	4.74919e-06	0.059911
Cct4	0.270608	0.633	0.802	4.78221e-06	0.0603275
Cntn1	0.22597	0.307	0.502	4.87482e-06	0.0614958
D430041D05Rik	0.229281	0.134	0.28	4.89598e-06	0.0617628
Tbl1x	0.210436	0.156	0.313	4.91901e-06	0.0620533
Nhp2	0.26029	0.66	0.819	4.98512e-06	0.0628872
Plppr1	-0.322502	0.712	0.588	4.98619e-06	0.0629007
Fam177a	0.271844	0.677	0.807	5.22942e-06	0.0659691
Eif2b2	0.23053	0.178	0.333	5.23654e-06	0.066059
Sept11	0.231374	0.296	0.477	5.27912e-06	0.0665961
Cep170	0.247898	0.359	0.539	5.28507e-06	0.0666711
Uba3	0.208429	0.219	0.391	5.30861e-06	0.0669682
Mtx2	0.252634	0.419	0.588	5.33735e-06	0.0673307
Rgs6	0.231552	0.222	0.391	5.41683e-06	0.0683334
Snca	-0.274914	0.956	0.897	5.44358e-06	0.0686708
Ddn	0.180315	0.085	0.214	5.54007e-06	0.069888
Fxyd6	0.272392	0.74	0.856	5.72252e-06	0.0721896
E530001K10Rik	0.157951	0.044	0.148	5.87887e-06	0.0741619
Ppp3cb	0.25193	0.51	0.687	6.01012e-06	0.0758176
Pin1	0.274573	0.737	0.881	6.12583e-06	0.0772774
Nrxn2	0.258135	0.605	0.782	6.47951e-06	0.081739	Septa
Cpne2	0.140876	0.03	0.123	6.55878e-06	0.082739
Kif21b	0.230475	0.353	0.539	6.58006e-06	0.0830074
Nrxn1	-0.239681	0.973	0.905	6.65208e-06	0.083916
Map2k2	0.221249	0.54	0.737	6.72858e-06	0.084881
Mapt	0.194772	0.997	0.996	6.93496e-06	0.0874845
Ctnnd2	0.207131	0.192	0.354	6.99357e-06	0.0882239
Eif5a	0.218679	0.995	0.992	7.08269e-06	0.0893481
Tmem150c	0.230661	0.153	0.3	7.14371e-06	0.0901179
Calb1	0.203445	0.022	0.107	7.17108e-06	0.0904632
Txnl4a	0.218352	0.507	0.712	7.29658e-06	0.0920463
Chst2	0.182986	0.066	0.181	7.30084e-06	0.0921001
Zmiz2	0.234315	0.252	0.424	7.33799e-06	0.0925688
Naa10	0.211154	0.145	0.292	7.36787e-06	0.0929457
Gabra2	0.258543	0.192	0.346	7.3882e-06	0.0932021
Cox18	0.186258	0.093	0.222	7.43538e-06	0.0937973
Fam102b	0.188554	0.096	0.226	7.49579e-06	0.0945594
Lor	0.21129	0.373	0.572	7.53603e-06	0.095067
Vps4a	0.252073	0.4	0.584	7.72161e-06	0.0974081
Ptges3	0.223318	0.449	0.638	7.80689e-06	0.0984839
Ube2l3	0.25215	0.526	0.712	7.82182e-06	0.0986723
Atf4	0.247916	0.441	0.609	7.89542e-06	0.0996007
Psme1	0.230059	0.247	0.416	7.90884e-06	0.09977
Tceal8	0.225052	0.463	0.65	8.00041e-06	0.100925
Add2	0.251925	0.351	0.519	8.11341e-06	0.102351
Rhof	0.191011	0.142	0.292	8.29993e-06	0.104704
Smap1	0.240821	0.175	0.325	8.41271e-06	0.106126
Golgb1	0.188259	0.296	0.481	8.76178e-06	0.11053
Prdx2	0.220062	0.962	0.979	9.22378e-06	0.116358
Tmem63b	0.218553	0.277	0.457	9.22744e-06	0.116404
Cdpf1	0.163398	0.088	0.214	9.4446e-06	0.119144
Klhl5	0.197479	0.115	0.251	9.73115e-06	0.122758
Sobp	0.26638	0.351	0.519	9.86167e-06	0.124405
Fam101b	0.129411	0.036	0.132	9.974e-06	0.125822
Fam168b	0.251021	0.389	0.551	1.00946e-05	0.127343
Faim	0.214213	0.211	0.37	1.04973e-05	0.132423
Vldlr	0.231153	0.277	0.44	1.06147e-05	0.133905
Arhgap33	0.223997	0.392	0.572	1.06983e-05	0.13496
Faf1	0.191531	0.184	0.342	1.08449e-05	0.136809
Atn1.1	0.177549	0.148	0.296	1.08578e-05	0.136971
Prnp	0.249307	0.334	0.502	1.08617e-05	0.13702
Cct8	0.227191	0.523	0.708	1.11393e-05	0.140522
Ssr1	0.225186	0.31	0.486	1.13763e-05	0.143513
Gng2	0.243145	0.8	0.905	1.15434e-05	0.14562
Wbp4	0.253957	0.356	0.519	1.16988e-05	0.147581
Reep1	0.220709	0.479	0.671	1.19621e-05	0.150902
Tpm1	0.246516	0.258	0.416	1.20974e-05	0.152609
Sys1	0.21868	0.474	0.65	1.21015e-05	0.152661
Leprot	0.252384	0.244	0.395	1.2416e-05	0.156628
Btbd2	0.180315	0.093	0.218	1.24627e-05	0.157217
Samd8	0.175309	0.145	0.292	1.24721e-05	0.157336
Ap1m1	0.234269	0.312	0.49	1.26475e-05	0.159548
Nrip1	0.22437	0.23	0.395	1.2724e-05	0.160513
Ufm1	0.220812	0.416	0.605	1.27832e-05	0.16126
Rangap1	0.215918	0.356	0.547	1.2817e-05	0.161686
Scd2	0.257897	0.397	0.56	1.28245e-05	0.161781
Bok	0.254289	0.605	0.724	1.29461e-05	0.163315
Arrdc4	0.223942	0.274	0.44	1.31437e-05	0.165808
Rspo3	0.0968012	0.008	0.074	1.33973e-05	0.169008
Grid1	0.130383	0.03	0.119	1.34032e-05	0.169081
Snx16	0.222558	0.43	0.613	1.34072e-05	0.169132
Eif6	0.250013	0.573	0.737	1.34937e-05	0.170223
Gtf2f2	0.21633	0.17	0.321	1.37042e-05	0.172879
Cacnb3	0.243131	0.652	0.778	1.37109e-05	0.172964
Ngfrap1	0.209416	0.951	0.984	1.37892e-05	0.17395
Aacs	0.210377	0.195	0.35	1.38625e-05	0.174875
Prkacb	0.199147	0.411	0.609	1.40034e-05	0.176653
Ptk2b	0.223916	0.203	0.358	1.40058e-05	0.176683
Pop7	0.242774	0.362	0.523	1.43316e-05	0.180793
Hn1	0.168822	1	1	1.43631e-05	0.181191
Ptprf	0.196076	0.167	0.317	1.44443e-05	0.182215
Hivep1	0.142884	0.049	0.152	1.44994e-05	0.18291
Gnao1	0.273125	0.644	0.786	1.45084e-05	0.183024
Lpl	-0.340598	0.822	0.737	1.46539e-05	0.184859
Acot9	0.184394	0.214	0.379	1.47471e-05	0.186035
Wdr34	0.207131	0.186	0.342	1.47963e-05	0.186655
Arf3	0.241805	0.471	0.667	1.50893e-05	0.190351
2810428I15Rik	0.219862	0.504	0.691	1.52251e-05	0.192065
Ccl27a	0.271191	0.86	0.934	1.53038e-05	0.193057
Dcun1d4	0.16574	0.071	0.185	1.53292e-05	0.193378
Tax1bp3	0.234507	0.249	0.403	1.53305e-05	0.193394
Erc2	0.19502	0.214	0.374	1.53941e-05	0.194197
Agpat5	0.192862	0.115	0.247	1.54328e-05	0.194685
Tmem261	0.260669	0.321	0.465	1.54421e-05	0.194802
Itpr1	0.155657	0.06	0.169	1.54424e-05	0.194805
Bmp2	0.13844	0.033	0.123	1.57008e-05	0.198065
Wasf3	0.171903	0.068	0.181	1.58457e-05	0.199894
Gnaq	0.206516	0.449	0.638	1.58844e-05	0.200382
Commd7	0.255097	0.34	0.494	1.60205e-05	0.202099
Asns	0.248392	0.315	0.477	1.60364e-05	0.202299
Tnpo1	0.150622	0.058	0.165	1.63611e-05	0.206395
Gpr158	-0.141956	0.132	0.029	1.66019e-05	0.209433	Hollow	YES
Kif3c	0.232043	0.323	0.49	1.66076e-05	0.209505
Cfap36	0.237101	0.403	0.568	1.66238e-05	0.20971
Aig1	0.208715	0.304	0.477	1.66311e-05	0.209802
Ak1	0.265691	0.367	0.519	1.67627e-05	0.211461
Ccdc74a	0.13844	0.036	0.128	1.69062e-05	0.213272
Rab6b	0.238405	0.51	0.683	1.6987e-05	0.214291
Pdp1	0.146899	0.063	0.173	1.71862e-05	0.216804
Ly6h	0.204745	0.997	0.992	1.72747e-05	0.217921
Mtpn	0.229388	0.545	0.716	1.73909e-05	0.219386
Map9	0.246865	0.477	0.626	1.75249e-05	0.221077
Mrpl42	0.233097	0.66	0.794	1.76248e-05	0.222337
Gpsm1	0.227449	0.381	0.547	1.76698e-05	0.222905
Cntnap2	0.140498	0.058	0.165	1.777e-05	0.224169
Gpr27	0.203335	0.2	0.354	1.8082e-05	0.228105
Prkca	0.239325	0.148	0.284	1.86058e-05	0.234712
Wdr12	0.195857	0.17	0.321	1.88397e-05	0.237662
Tmem9	0.213852	0.356	0.531	1.91424e-05	0.241481
Pgls	0.230649	0.66	0.798	1.93357e-05	0.243919
Ranbp1	0.238905	0.858	0.971	1.9372e-05	0.244378
Ndufa4	-0.197986	1	0.992	1.94305e-05	0.245116
1110015O18Rik	0.0880486	0.003	0.058	1.95655e-05	0.246819
Efna5	0.267022	0.348	0.51	1.9725e-05	0.248831
Faap100	0.211759	0.252	0.407	1.99368e-05	0.251503
Kdm2b	0.241361	0.488	0.654	2.01425e-05	0.254098
Psmb5	0.251337	0.718	0.827	2.09533e-05	0.264326
Ache	0.141206	0.041	0.136	2.11368e-05	0.26664
Slitrk5	0.236754	0.244	0.395	2.12019e-05	0.267461
Ier5	-0.228185	0.323	0.169	2.14564e-05	0.270672	Hollow	YES
Nudt2	0.177732	0.263	0.44	2.14605e-05	0.270724
Srsf10	0.211507	0.323	0.498	2.15295e-05	0.271595
Itgb1bp1	0.17639	0.151	0.296	2.17279e-05	0.274097
Gm9493	0.22868	0.419	0.588	2.1993e-05	0.277441
Psd	0.263844	0.477	0.621	2.20841e-05	0.278591
Emx1	0.21215	0.636	0.802	2.23767e-05	0.282283
Ube2w	0.246246	0.422	0.568	2.24412e-05	0.283096
1110004E09Rik	0.189181	0.29	0.465	2.28285e-05	0.287981
Lgals7	0.157689	0.079	0.198	2.28296e-05	0.287995
Btbd3	-0.156961	0.121	0.025	2.31649e-05	0.292225	Hollow	YES
Hddc2	0.231552	0.233	0.383	2.33259e-05	0.294256
Zbed3	-0.171283	0.167	0.053	2.35315e-05	0.29685	Hollow	YES
2410004B18Rik	0.202276	0.463	0.654	2.36425e-05	0.29825
Tdrkh	0.206722	0.151	0.288	2.39023e-05	0.301527
Gprin1	0.205168	0.192	0.342	2.40452e-05	0.30333
Napg	0.204524	0.26	0.424	2.46951e-05	0.311528
Ccdc25	0.213033	0.186	0.329	2.47133e-05	0.311759
Kars	0.242143	0.244	0.391	2.47892e-05	0.312716
Capn7	0.182245	0.126	0.259	2.5087e-05	0.316473
Atp5g1	0.171	0.995	0.996	2.51231e-05	0.316928
Wdfy1	0.184503	0.203	0.362	2.53232e-05	0.319452
Lin7b	0.229481	0.268	0.424	2.54957e-05	0.321628
Pex11b	0.215684	0.255	0.412	2.54971e-05	0.321645
Hdgfrp3	0.235866	0.499	0.658	2.55774e-05	0.322658
Chgb	-0.460797	0.619	0.51	2.55993e-05	0.322935
Hsp90ab1	0.171903	1	1	2.59384e-05	0.327213
Mapk10	0.251206	0.342	0.498	2.59949e-05	0.327925
Pip4k2a	0.162155	0.085	0.202	2.64144e-05	0.333218
Ost4	0.241112	0.419	0.572	2.6716e-05	0.337022
Bcl6b	0.161953	0.06	0.165	2.67703e-05	0.337708
Apitd1	0.141529	0.052	0.152	2.68397e-05	0.338583
Bnip2	0.188391	0.11	0.235	2.70499e-05	0.341235
Arpc5	0.232728	0.978	0.979	2.71193e-05	0.34211
Sqle	0.240115	0.592	0.745	2.71276e-05	0.342215
Ggh	0.170721	0.101	0.226	2.72169e-05	0.343341
Cdc42ep4	0.198433	0.203	0.354	2.72808e-05	0.344148
Asrgl1	0.177827	0.096	0.218	2.75326e-05	0.347323
Eif3c	0.199014	0.474	0.654	2.77053e-05	0.349502
Slc17a7	0.142884	0.055	0.156	2.78205e-05	0.350955
Ppm1g	0.230278	0.4	0.564	2.79361e-05	0.352414
Flot2	0.208695	0.375	0.547	2.79422e-05	0.352491
St8sia2	0.217972	0.214	0.362	2.87781e-05	0.363036
Mfn2	0.202365	0.211	0.362	2.90169e-05	0.366048
Rnf112	0.137777	0.052	0.152	2.90202e-05	0.36609
Nr4a2	0.0912842	0.008	0.07	2.93051e-05	0.369684
Brwd1	0.243515	0.356	0.51	2.96807e-05	0.374422
Cyp51	0.242112	0.315	0.473	3.0102e-05	0.379736
Lrp8	0.167315	0.132	0.267	3.01611e-05	0.380482
Kifap3	0.246015	0.704	0.831	3.03888e-05	0.383354
Zfand3	0.188095	0.186	0.337	3.04025e-05	0.383527
Ptbp2	0.226897	0.285	0.444	3.05126e-05	0.384916
Pfn1	0.193707	0.422	0.609	3.08865e-05	0.389633
Ablim2	0.148221	0.06	0.165	3.15621e-05	0.398156
Tmub1	0.212123	0.323	0.486	3.15969e-05	0.398595
Ube2ql1	0.184012	0.145	0.288	3.18158e-05	0.401356
Mgea5	0.23788	0.444	0.601	3.22675e-05	0.407054
Phb2	0.189151	0.641	0.811	3.23933e-05	0.408642
Tbc1d19	0.147156	0.066	0.173	3.25058e-05	0.410061
Calm1	-0.128046	1	1	3.26883e-05	0.412364
Pak2	0.229892	0.211	0.35	3.32598e-05	0.419573
Gpr85	0.228226	0.693	0.823	3.38444e-05	0.426947
Hsdl1	0.165644	0.219	0.379	3.40426e-05	0.429448
Atp5g3	0.213154	0.575	0.761	3.47705e-05	0.43863
Cox19	0.208695	0.356	0.535	3.63265e-05	0.458259
Smarcc1	0.181596	0.2	0.35	3.67614e-05	0.463745
Mrpl54	0.231782	0.356	0.519	3.72211e-05	0.469544
Ppp1r16a	0.21689	0.197	0.337	3.74153e-05	0.471994
Vps36	0.211812	0.321	0.486	3.775e-05	0.476216
Ppp2r3c	0.216421	0.236	0.387	3.78009e-05	0.476859
Smc1a	0.194623	0.236	0.391	3.79413e-05	0.478629
Wdr31	0.0785312	0.005	0.062	3.84276e-05	0.484764
Ogfr	0.197099	0.249	0.407	3.90963e-05	0.4932
Tprkb	0.186817	0.132	0.263	3.92397e-05	0.495008
Snrnp35	0.125609	0.038	0.128	3.95916e-05	0.499448
Ubc	-0.317656	0.904	0.844	3.96577e-05	0.500281
Sox12	0.19049	0.178	0.321	3.9856e-05	0.502784
Txndc9	0.218111	0.474	0.638	3.98674e-05	0.502927
Txn1	0.257029	0.797	0.909	3.99655e-05	0.504165
Hsd17b12	0.202563	0.134	0.263	4.01323e-05	0.506269
Fam136a	0.244397	0.326	0.477	4.03801e-05	0.509394
Tmeff1	0.203875	0.26	0.416	4.08568e-05	0.515409
Pde4d	0.134225	0.027	0.107	4.17835e-05	0.527099
Ppp1r9b	0.184181	0.238	0.395	4.18843e-05	0.52837
0610010F05Rik	0.239841	0.479	0.642	4.19001e-05	0.52857
Ate1	0.190281	0.134	0.263	4.20572e-05	0.530551
Pde4dip	0.185449	0.142	0.276	4.21369e-05	0.531557
Kras	0.195231	0.422	0.605	4.21742e-05	0.532027
Med10	0.23355	0.537	0.695	4.26141e-05	0.537576
Pdzrn3	0.19292	0.225	0.387	4.33415e-05	0.546753
H13	0.207267	0.304	0.461	4.3658e-05	0.550746
Adgrg1	0.105335	0.025	0.103	4.3685e-05	0.551086
C2cd4c	0.103857	0.011	0.074	4.38217e-05	0.55281
Uhrf1bp1	0.0712403	0.003	0.053	4.44271e-05	0.560448
Rbm17	0.21226	0.414	0.58	4.45032e-05	0.561408
Lcmt1	0.193707	0.46	0.642	4.46841e-05	0.56369
Sft2d1	0.209303	0.301	0.461	4.50309e-05	0.568065
Hebp2	0.0873691	0.011	0.074	4.54381e-05	0.573202
Creg2	0.164778	0.101	0.222	4.6462e-05	0.586118
Chchd6	0.212195	0.463	0.638	4.74345e-05	0.598386
Rps19bp1	0.22588	0.584	0.724	4.80391e-05	0.606013
Ube2e3	0.245801	0.748	0.864	4.90053e-05	0.618201
Srp19	0.210792	0.493	0.663	4.93928e-05	0.623091
Rplp1	0.175631	0.997	0.996	4.94623e-05	0.623967
Ankmy2	0.145342	0.099	0.218	4.95786e-05	0.625434
Tmem55b	0.178613	0.403	0.588	4.98532e-05	0.628898
Lrrtm2	0.162348	0.096	0.214	5.03297e-05	0.634909
Ralgds	0.188826	0.2	0.35	5.08097e-05	0.640964
Apoo	0.222666	0.282	0.428	5.08289e-05	0.641207
Ppp2r4	0.191673	0.222	0.374	5.09832e-05	0.643153
Timm9	0.209834	0.332	0.49	5.10312e-05	0.643758
Ankrd13d	0.195039	0.173	0.309	5.13314e-05	0.647546
Cpa2	0.17427	0.107	0.226	5.2402e-05	0.661051
Ift22	0.209022	0.288	0.44	5.26725e-05	0.664464
Rpl38	0.195186	0.97	0.984	5.31827e-05	0.6709
Ndufb4	0.209816	0.819	0.901	5.36384e-05	0.676648
Sema4c	0.139141	0.055	0.152	5.43895e-05	0.686124
Grin2b	0.243416	0.636	0.794	5.45228e-05	0.687805
Copz1	0.211138	0.37	0.527	5.49094e-05	0.692682
Aamp	0.206051	0.529	0.691	5.49949e-05	0.693761
Mboat7	0.165983	0.11	0.23	5.61298e-05	0.708078
Bend6	-0.254468	0.871	0.798	5.67679e-05	0.716126
Micall1	0.143185	0.058	0.156	5.75234e-05	0.725657
Elavl2	0.265012	0.266	0.407	5.76325e-05	0.727034
Nedd4	0.209326	0.274	0.424	5.79106e-05	0.730543
Dlg4	0.178424	0.315	0.49	5.8412e-05	0.736868
Gm8730	0.22075	0.34	0.494	5.84377e-05	0.737191
Abi2	0.211102	0.447	0.613	5.84916e-05	0.737871
Mad2l2	0.185578	0.134	0.263	5.86998e-05	0.740497
Rad23a	0.207417	0.164	0.296	5.89031e-05	0.743063
Vasp	0.156611	0.118	0.243	5.93788e-05	0.749064
Gjd2	0.115982	0.033	0.115	5.95744e-05	0.751531
Tceal7	0.115982	0.033	0.115	5.95744e-05	0.751531
Vgf	0.131371	0.022	0.095	5.97861e-05	0.754202
Atxn7l3b	-0.188845	1	0.988	5.99888e-05	0.756759
Fam126a	0.169622	0.137	0.267	6.00961e-05	0.758112
Eef1d	0.219395	0.301	0.449	6.08005e-05	0.766998
A730017C20Rik	0.220476	0.266	0.412	6.11964e-05	0.771993
Med30	0.212775	0.247	0.391	6.12775e-05	0.773015
Sat1	-0.191545	0.227	0.103	6.14147e-05	0.774746
Pacs2	0.183147	0.148	0.28	6.17762e-05	0.779307
Gm19345	0.137137	0.068	0.173	6.20881e-05	0.783241
Hnrnpd	0.209669	0.244	0.391	6.28196e-05	0.792469
Pdcl3	0.217818	0.359	0.519	6.31559e-05	0.796712
A830009L08Rik	-0.243135	0.526	0.358	6.3264e-05	0.798075
Prelid1	0.226169	0.559	0.708	6.35468e-05	0.801643
Atp9a	0.209259	0.329	0.486	6.36609e-05	0.803083
Jagn1	0.166916	0.263	0.432	6.3848e-05	0.805442
Lhfp	-0.313408	0.655	0.551	6.41855e-05	0.8097
Cox17	0.206909	0.271	0.416	6.47858e-05	0.817273
Rpl8	0.188276	0.989	0.988	6.536e-05	0.824517
Pea15a	0.188196	0.553	0.72	6.56898e-05	0.828676
Gm9844	0.247274	0.312	0.449	6.5847e-05	0.83066
Crip1	0.121817	0.033	0.115	6.58708e-05	0.83096
Cobl	0.0991908	0.022	0.095	6.61685e-05	0.834715
Cmpk1	0.204937	0.537	0.708	6.67871e-05	0.84252
Cntnap5a	0.122865	0.058	0.156	6.74005e-05	0.850258
Nebl	0.0762714	0.008	0.066	6.79246e-05	0.856869
Cdk6	0.100742	0.022	0.095	6.89004e-05	0.869178
Mgrn1	0.210377	0.208	0.346	6.90995e-05	0.871691
Dbi	0.214363	0.392	0.547	6.91499e-05	0.872326
Scamp3	0.207527	0.274	0.424	6.92422e-05	0.87349
Phyhipl	0.243223	0.255	0.395	6.98221e-05	0.880805
Apopt1	0.155057	0.099	0.214	7.00478e-05	0.883653
Vma21	0.18255	0.203	0.346	7.04628e-05	0.888888
Lrrn2	0.235919	0.37	0.531	7.07294e-05	0.892251
Bub3	0.198142	0.4	0.572	7.10687e-05	0.896532
Bin1	0.220599	0.441	0.605	7.11738e-05	0.897857
Hrh3	-0.117473	0.121	0.029	7.14178e-05	0.900936	Hollow	YES
Rab4a	0.189063	0.43	0.609	7.17061e-05	0.904573
Cox6c	0.193368	0.992	1	7.28959e-05	0.919582
Klhl8	0.163587	0.241	0.399	7.34816e-05	0.92697
Npm3	0.206145	0.414	0.568	7.4091e-05	0.934658
Pou2f2	0.167226	0.121	0.243	7.53277e-05	0.950259
Stx4a	0.179991	0.121	0.243	7.58691e-05	0.957089
Spred2	0.118342	0.025	0.099	7.70895e-05	0.972484
Map7d1	0.217706	0.414	0.568	7.78266e-05	0.981782
Hnrnpc	0.197073	0.499	0.675	7.97553e-05	1
Atat1	0.222006	0.584	0.716	7.99264e-05	1
Rbm24	0.156149	0.088	0.198	8.00223e-05	1
Gpr26	0.163729	0.121	0.243	8.05759e-05	1
Spast	0.163729	0.121	0.243	8.25444e-05	1
Ext1	0.150841	0.071	0.173	8.37124e-05	1
Kidins220	0.22635	0.34	0.494	8.57556e-05	1
Aktip	0.199715	0.392	0.547	8.64702e-05	1
Nrip3	0.157256	0.079	0.185	8.73809e-05	1
Dcaf12	0.209742	0.186	0.317	8.84126e-05	1
Arhgef4	0.216421	0.244	0.383	9.04606e-05	1
Pclo	0.192021	0.195	0.337	9.05965e-05	1
Poc1a	0.144797	0.077	0.181	9.13114e-05	1
Epn2	0.134034	0.055	0.148	9.4013e-05	1
Comtd1	0.174097	0.173	0.309	9.41328e-05	1
Ldb2	0.0695409	0	0.041	9.47964e-05	1
Fkbp1a	0.16121	0.992	0.996	9.53241e-05	1
Vps26b	0.183283	0.227	0.379	9.67445e-05	1
Cgref1	0.221349	0.268	0.412	9.6946e-05	1
Rps25	0.161406	1	0.996	9.70009e-05	1
Pkig	0.18594	0.603	0.757	9.81314e-05	1
Zmym3	0.195224	0.211	0.35	9.84457e-05	1
Pcm1	0.197898	0.282	0.436	9.90958e-05	1
Htr7	0.0768649	0.003	0.049	9.93512e-05	1
Polr2k	0.175672	0.515	0.679	9.98554e-05	1
Rem2	0.179062	0.096	0.206	9.99346e-05	1
Lyrm9	0.174138	0.156	0.288	0.000100257	1
Gemin7	0.198289	0.501	0.65	0.000101536	1
Eno1	0.181808	0.471	0.65	0.000102249	1
Pcbd1	0.137137	0.068	0.169	0.000103116	1
Ppp4r2	0.143614	0.118	0.239	0.000103145	1
Mthfd2l	0.179621	0.175	0.309	0.000103474	1
Mapre1	0.210905	0.707	0.823	0.000103579	1
D6Wsu163e	0.134428	0.063	0.16	0.000103893	1
Stard4	0.134428	0.063	0.16	0.000103893	1
Gas8	0.167133	0.099	0.21	0.000104052	1
Mettl9	0.22772	0.575	0.704	0.000104093	1
Cbfb	0.15989	0.099	0.21	0.000104133	1
Ppil1	0.173848	0.296	0.457	0.000104329	1
Eif3j1	0.183482	0.216	0.358	0.000105205	1
Fabp3	0.208884	0.784	0.897	0.000105563	1
Scn9a	0.110668	0.03	0.107	0.000105982	1
Hars	0.189475	0.381	0.535	0.000106087	1
Sap30bp	0.213125	0.236	0.37	0.000106173	1
9330159F19Rik	0.194623	0.26	0.407	0.000106284	1
Sh3yl1	0.193509	0.263	0.42	0.00010631	1
Map4k1	0.156611	0.112	0.23	0.000107015	1
Klhl2	0.189017	0.137	0.259	0.000107195	1
Map1lc3a	0.165897	0.997	1	0.000107587	1
Tcaf1	0.223212	0.37	0.519	0.000109219	1
Pak1	0.200116	0.408	0.564	0.000109291	1
Hcfc1r1	0.219386	0.671	0.815	0.000113271	1
4931428F04Rik	0.205553	0.225	0.358	0.000113394	1
Cplx2	0.23003	0.792	0.881	0.000113425	1
Nol4l	0.159283	0.137	0.263	0.000115456	1
Camk2n2	0.211431	0.337	0.494	0.000116138	1
Clptm1l	0.149408	0.241	0.399	0.000118956	1
Gm11808	0.182996	0.252	0.395	0.000119107	1
Grm4	-0.1135	0.101	0.021	0.000119646	1	Hollow	YES
0610007P14Rik	0.242357	0.578	0.695	0.000120684	1
Palm3	0.106847	0.033	0.111	0.000120954	1
Ntrk3	0.222332	0.31	0.457	0.000121693	1
Arf2	0.188776	0.31	0.461	0.000121707	1
Fam132a	0.170709	0.093	0.202	0.000122352	1
Rasd2	-0.0970324	0.068	0.004	0.000122821	1	Hollow	YES
Fabp7	0.204301	0.189	0.329	0.000124934	1
Srsf3	0.184631	0.786	0.893	0.000125278	1
Pnmal1	0.169664	0.153	0.284	0.000126476	1
Hnrnpa1	0.185673	0.934	0.971	0.000126508	1
Smim11	0.187193	0.181	0.313	0.000126568	1
Dkkl1	0.186402	0.077	0.177	0.000128264	1
Golga7b	0.159346	0.411	0.593	0.000129275	1
Malat1	-0.168841	1	1	0.00012937	1
Lsm10	0.192484	0.23	0.374	0.000130948	1
E130012A19Rik	-0.13685	0.186	0.074	0.000130961	1
Borcs7	0.186905	0.4	0.564	0.000131627	1
Snrpa	0.184646	0.34	0.498	0.000133372	1
Glo1	0.170153	0.373	0.551	0.000133836	1
Cyld	0.125609	0.041	0.123	0.000134075	1
Timm17b	0.18118	0.238	0.383	0.000135403	1
Purg	0.196657	0.181	0.313	0.000135554	1
Obfc1	0.132234	0.044	0.128	0.000136221	1
Nme1	0.153492	1	0.996	0.000136894	1
Eif4e2	0.170817	0.189	0.325	0.000137148	1
Hebp1	0.0801865	0.008	0.062	0.00013819	1
Rad51d	0.120372	0.041	0.123	0.00013825	1
Pkp4	0.213262	0.208	0.337	0.000139589	1
March8	0.14377	0.085	0.189	0.000142185	1
Tpi1	0.219759	0.663	0.79	0.000142341	1
Mrpl21	0.146917	0.389	0.58	0.000142479	1
Chka	0.18495	0.255	0.399	0.00014435	1
Nrp1	0.140166	0.049	0.136	0.000145305	1
Huwe1	0.196518	0.345	0.494	0.000146794	1
Sestd1	0.14487	0.123	0.243	0.000147457	1
Slc25a39	0.144797	0.077	0.177	0.000148389	1
Mvk	0.187193	0.184	0.313	0.000148703	1
Spryd3	0.199708	0.34	0.494	0.000150783	1
Bsn	0.146107	0.079	0.181	0.000151075	1
Stx8	0.166608	0.219	0.362	0.000151133	1
Gpi1	0.227859	0.263	0.395	0.000151387	1
Ndufc2	0.240989	0.893	0.93	0.000153333	1
Rusc1	0.209799	0.337	0.477	0.000153908	1
Sccpdh	0.199701	0.323	0.469	0.000154776	1
Rhou	0.168742	0.225	0.366	0.000155209	1
Lypd6b	0.145569	0.055	0.144	0.000159001	1
Asf1a	0.189605	0.156	0.28	0.000159848	1
Nlk	0.136774	0.06	0.152	0.000162082	1
0610037L13Rik	0.181342	0.222	0.358	0.000162675	1
Npy1r	0.128909	0.058	0.148	0.000163118	1
Wdr83os	0.219484	0.548	0.7	0.000163237	1
Kctd4	-0.27886	0.493	0.358	0.000163336	1
Sod2	0.199124	0.411	0.56	0.00016336	1
Tbpl1	0.188776	0.323	0.465	0.000163368	1
Aida	0.168714	0.2	0.337	0.000164664	1
Cldnd1	0.193436	0.37	0.519	0.000165881	1
Scarb2	0.170776	0.159	0.284	0.000165884	1
Gm12027	0.155224	0.104	0.214	0.000168535	1
4921524J17Rik	0.207325	0.364	0.494	0.00016907	1
Jkamp	0.194172	0.468	0.626	0.000169167	1
Lurap1	0.0960589	0.016	0.078	0.000169687	1
Dact1	0.0960589	0.016	0.078	0.000169687	1
Ptges2	0.157983	0.274	0.428	0.000170275	1
Carm1	0.11572	0.052	0.14	0.000170966	1
Cox6b1	0.156306	0.989	0.992	0.000171126	1
Mrps21	0.20454	0.649	0.77	0.000171496	1
Phactr1	0.211573	0.378	0.523	0.00017203	1
Ivns1abp	0.219997	0.575	0.72	0.000172769	1
Gsto1	0.192256	0.463	0.621	0.000174281	1
Frmd3	0.200161	0.203	0.333	0.000174441	1
Coro1a	0.173848	0.293	0.444	0.00017484	1
Zc2hc1a	0.190152	0.564	0.728	0.000178522	1
Srp14	0.222844	0.773	0.852	0.000179301	1
Ccdc167	0.118604	0.055	0.144	0.00017945	1
Kmt2c	0.168371	0.115	0.226	0.000180067	1
Gstm5	0.184293	0.529	0.691	0.000181451	1
Tmem150a	0.126629	0.099	0.21	0.000181993	1
Arl6ip4	0.199258	0.34	0.481	0.000182537	1
Ehmt2	0.190844	0.214	0.35	0.00018321	1
Ncln	0.139814	0.071	0.169	0.000185621	1
Slc16a11	0.0729284	0.005	0.053	0.000186549	1
Klhl13	0.0673039	0.005	0.053	0.0001878	1
Layn	0.0673039	0.005	0.053	0.0001878	1
Ap4s1	0.214463	0.301	0.44	0.000188607	1
Nfib	0.210086	0.312	0.457	0.00018876	1
Sh3gl2	0.22151	0.31	0.457	0.000190153	1
Mrpl13	0.200785	0.337	0.477	0.000190736	1
Jakmip1	0.191608	0.332	0.477	0.000190832	1
Bhlhb9	0.204524	0.277	0.416	0.000191145	1
Isyna1	0.18007	0.112	0.222	0.000192015	1
Hbs1l	0.160257	0.37	0.531	0.000192848	1
Gm3693	0.103814	0.03	0.103	0.00019522	1
Dclk2	0.168536	0.167	0.292	0.000196746	1
Celf6	0.146874	0.104	0.214	0.000197255	1
Kpna4	0.160178	0.2	0.337	0.00020163	1
Pgm3	0.148134	0.104	0.214	0.000202141	1
Fbxl15	0.171903	0.258	0.403	0.000206291	1
Gm11837	0.103064	0.019	0.082	0.000206452	1
Rprml	0.108477	0.019	0.082	0.000206452	1
Lrrtm1	0.157629	0.233	0.383	0.000207279	1
Map1s	0.146368	0.09	0.193	0.000208056	1
Tmem44	0.175597	0.345	0.502	0.000211425	1
Dlg2	0.164887	0.271	0.42	0.000212174	1
Rasl11b	-0.153228	0.208	0.095	0.000213775	1
Armcx6	0.0921755	0.019	0.082	0.000213921	1
Gm10419	0.105335	0.033	0.107	0.000214542	1
Sirt2	0.185147	0.315	0.461	0.000215192	1
Cadm4	-0.259192	0.666	0.58	0.000215462	1
Sertm1	0.0524674	0	0.037	0.000215516	1
Fbxw9	0.17955	0.178	0.305	0.000217588	1
Enkd1	0.0999818	0.033	0.107	0.000220147	1
Fam219a	0.195362	0.285	0.428	0.000221881	1
Rab9b	0.148464	0.077	0.173	0.000222528	1
Plxna1	0.193598	0.345	0.494	0.000223297	1
Lxn	0.150208	0.09	0.193	0.000224316	1
Robo1	0.059925	0.003	0.045	0.000225296	1
Tubg1	0.184727	0.2	0.333	0.000225883	1
Gm3488	0.138516	0.104	0.214	0.000225967	1
Inafm1	0.20284	0.433	0.568	0.000227778	1
Psmd14	0.177549	0.553	0.724	0.000227847	1
Kif2a	0.182098	0.244	0.383	0.000228605	1
Fam184a	0.0828273	0.019	0.082	0.000229467	1
Mrfap1	-0.197376	0.97	0.971	0.000229734	1
Tmem107	0.159645	0.074	0.169	0.000230393	1
Ergic1	0.173848	0.29	0.436	0.000231875	1
Uck1	0.16329	0.2	0.333	0.000233475	1
Pdcd6	0.191248	0.482	0.642	0.000234932	1
Suclg1	0.190181	0.389	0.547	0.00023533	1
Ube2d1	0.192661	0.51	0.65	0.000235809	1
Dynlt1a	0.161436	0.129	0.243	0.000237379	1
Gpc5	0.195331	0.307	0.453	0.000240948	1
Oscp1	0.167133	0.101	0.206	0.000242713	1
Spag9	0.197197	0.282	0.416	0.000244056	1
Ppp2r5e	0.183777	0.274	0.416	0.000244456	1
Gorasp2	0.181982	0.353	0.51	0.000245334	1
Prkce	0.198168	0.31	0.457	0.000247248	1
Rangrf	0.163729	0.126	0.239	0.000248243	1
R3hdm2	0.187333	0.175	0.296	0.000248902	1
Arl8a	0.189667	0.405	0.56	0.000249151	1
Itm2a	0.111325	0.038	0.115	0.000249505	1
Dynlrb1	0.148819	0.989	0.996	0.000250091	1
Sparcl1	0.0991908	0.022	0.086	0.000250551	1
Gm6710	0.142155	0.181	0.313	0.000251104	1
Cdk17	0.169725	0.186	0.313	0.000251322	1
Dut	0.159046	0.345	0.502	0.00025135	1
Ywhaq	0.174787	0.989	0.996	0.000251506	1
Raly	0.214746	0.644	0.782	0.000253458	1
Zfp560	0.186402	0.296	0.432	0.000255763	1
Tipin	0.195596	0.244	0.37	0.000260644	1
Mrpl55	0.162252	0.458	0.609	0.000263562	1
Syngr3	0.240234	0.521	0.646	0.000264374	1
Smim14	0.206993	0.603	0.737	0.000265137	1
Fam19a1	0.200505	0.381	0.523	0.000265622	1
Gm3636	0.131156	0.079	0.177	0.000265835	1
Cox7a2l	-0.231518	0.967	0.914	0.000266792	1
Fhl1	0.184842	0.268	0.412	0.000267554	1
Bbip1	0.19453	0.767	0.877	0.000268364	1
Mpnd	0.205146	0.441	0.572	0.000270008	1
Polr1e	0.0992336	0.038	0.115	0.000270071	1
Itga2b	0.0834647	0.014	0.07	0.000274249	1
Dcdc2a	-0.212207	0.227	0.115	0.000276761	1
Scrn1	0.192335	0.488	0.646	0.000276984	1
2610524H06Rik	0.182218	0.318	0.465	0.00027872	1
Gpn1	0.155146	0.17	0.296	0.000279005	1
Rnf7	0.18255	0.515	0.667	0.000281669	1
Gnal	0.178613	0.4	0.551	0.000283897	1
Nova2	0.188241	0.186	0.309	0.000284861	1
Arhgdig	0.210529	0.852	0.922	0.000285124	1
Crmp1	0.148011	0.997	1	0.000285162	1	Septa
Epb41l3	0.120919	0.049	0.132	0.000285775	1
Metap1	0.171903	0.132	0.243	0.000286121	1
Copa	0.192243	0.277	0.412	0.00028684	1
Cdc42bpb	0.160779	0.167	0.292	0.000288971	1
Fn1	0.085746	0.008	0.058	0.000292161	1
Cdadc1	0.123766	0.055	0.14	0.00029235	1
Psmd2	0.183174	0.551	0.712	0.0002935	1
Agk	0.163515	0.216	0.354	0.000293649	1
Mrpl40	0.181757	0.37	0.514	0.00029596	1
Trappc1	0.200505	0.411	0.56	0.000296938	1
Wbp5	0.226804	0.822	0.897	0.000298701	1
Slc25a1	0.12249	0.079	0.177	0.000298969	1
Arl3	0.228241	0.753	0.86	0.000300503	1
Nudt4	0.239856	0.641	0.757	0.000303608	1
Flii	0.110502	0.049	0.132	0.000305598	1
Rbfa	0.188881	0.367	0.514	0.000305961	1
Git1	0.146119	0.126	0.239	0.000306507	1
Ola1	0.18467	0.458	0.605	0.000307882	1
Elp3	0.152288	0.238	0.383	0.000311164	1
Galt	0.176935	0.247	0.383	0.000313909	1
Etv6	0.0650877	0.008	0.058	0.0003142	1
Tesk1	0.11631	0.06	0.148	0.000315207	1
Mrpl35	0.16431	0.323	0.473	0.000316995	1
Maea	0.159079	0.219	0.354	0.000317137	1
Cdkn2aipnl	0.186656	0.219	0.346	0.000317311	1
Slc35a2	0.159402	0.153	0.272	0.000322059	1
Zfp422	0.184327	0.31	0.449	0.000323007	1
Msantd1	0.11631	0.058	0.144	0.000324271	1
Sec61b	0.198487	0.745	0.86	0.000329124	1
Top2b	0.174638	0.337	0.49	0.000330528	1
Csnk2a1	0.18716	0.37	0.51	0.000331773	1
Ubl4a	0.166097	0.301	0.449	0.000337485	1
Trim67	0.233603	0.362	0.494	0.000337498	1
Lefty2	-0.1135	0.093	0.021	0.000337688	1
Hnrnpk	-0.178595	0.959	0.955	0.000338344	1
Smim10l2a	0.165177	0.164	0.284	0.000338366	1
1700097N02Rik	0.193276	0.082	0.177	0.000339843	1
Wdr6	0.15644	0.222	0.362	0.000340425	1
Cyb5b	0.198982	0.268	0.399	0.000340507	1
Tmem115	0.131359	0.137	0.255	0.000346731	1
Rfwd2	0.140116	0.123	0.235	0.000347228	1
Atrx	0.1726	0.559	0.7	0.000348357	1
Nucb2	0.14564	0.134	0.251	0.000350775	1
Scarb1	0.15659	0.186	0.313	0.000351584	1
Aprt	0.190895	0.518	0.654	0.000352048	1
Cxadr	0.18395	0.496	0.663	0.000352287	1
Chmp6	0.172894	0.285	0.42	0.000353251	1
Sf3b5	0.179638	0.616	0.778	0.00035366	1
Pvrl2	0.150841	0.121	0.23	0.00035369	1
Lsm1	0.162267	0.521	0.691	0.000354056	1
Sptlc2	0.170743	0.126	0.235	0.000357019	1
Stx12	0.195602	0.526	0.658	0.000357615	1
Crcp	0.194438	0.299	0.432	0.000357666	1
Efnb2	0.214784	0.214	0.333	0.000358429	1
Pnpla8	0.180381	0.323	0.461	0.000363548	1
Dguok	0.137493	0.085	0.181	0.00036382	1
Pcp4	0.163567	0.066	0.156	0.000364362	1
Them4	0.161826	0.164	0.284	0.000365659	1
Lrrc49	0.16329	0.189	0.317	0.00036808	1
Pcbp2	0.169272	0.595	0.757	0.000373462	1
Lasp1	0.192081	0.29	0.42	0.000374347	1
Nsdhl	0.192756	0.17	0.288	0.000375103	1
Ndufaf5	0.181102	0.255	0.383	0.000375796	1
Rpl12	0.222109	0.868	0.934	0.00037616	1
Mark4	0.169705	0.178	0.3	0.000376851	1
Rcan1	0.153329	0.186	0.313	0.000380421	1
A830080D01Rik	0.14584	0.071	0.16	0.000381559	1
Dcun1d5	0.182618	0.493	0.646	0.000385377	1
Cenpw	0.140392	0.164	0.288	0.000386318	1
Gabbr2	0.145131	0.123	0.235	0.000388362	1
Plscr3	0.13848	0.077	0.169	0.000389609	1
Marc2	0.173055	0.126	0.235	0.000389657	1
Lrrcc1	0.105335	0.033	0.103	0.000390269	1
Pde6d	0.223236	0.608	0.733	0.000390703	1
Dhcr7	0.153465	0.145	0.259	0.000390707	1
Ddx1	0.162055	0.433	0.605	0.000390944	1
Azi2	0.165177	0.17	0.288	0.000391192	1
Lsamp	0.162122	0.411	0.568	0.000394953	1
Dhps	0.182186	0.23	0.362	0.000395382	1
Prdx6	-0.245506	0.463	0.342	0.00039831	1
Plppr5	0.162713	0.142	0.255	0.00039931	1
Med19	0.162164	0.386	0.539	0.0004025	1
Rer1	0.164485	0.529	0.691	0.000405798	1
Dctn6	0.171159	0.499	0.667	0.000405997	1
Cfap206	0.0616573	0.005	0.049	0.000413048	1
Kctd12	0.0616573	0.005	0.049	0.000413048	1
Ccdc12	0.15179	0.474	0.646	0.000415288	1
Atxn7l3	0.169685	0.181	0.3	0.000417489	1
Rbmxl1	0.178566	0.438	0.588	0.000417536	1
Polr3k	0.179201	0.578	0.737	0.000418989	1
N4bp1	0.0867003	0.019	0.078	0.000425388	1
Myo1b	0.178597	0.167	0.284	0.000425423	1
Atp6v0b	-0.222274	0.973	0.901	0.000426937	1
Ube2r2	0.162359	0.214	0.346	0.000431622	1
Sh3bp2	0.0812043	0.019	0.078	0.000432805	1
Stk32b	0.0812043	0.019	0.078	0.000432805	1
Dgcr6	0.208647	0.553	0.667	0.00043352	1
Rnf182	0.144331	0.104	0.206	0.000434855	1
Ptpro	0.182274	0.233	0.358	0.000435307	1
Igfbp4	0.0937569	0.019	0.078	0.000437782	1
Prps1	0.182465	0.304	0.44	0.000437788	1
Lhfpl5	0.0961601	0.036	0.107	0.000439289	1
Ccny	0.138583	0.175	0.3	0.000440068	1
Prex1	0.138516	0.11	0.214	0.000441891	1
Rfx3	0.132102	0.071	0.16	0.000443481	1
Adamtsl2	0.135492	0.151	0.267	0.000443814	1
4833439L19Rik	0.191866	0.485	0.626	0.000444917	1
Usp25	0.072367	0.011	0.062	0.000445042	1
Sptssa	0.204367	0.622	0.774	0.000447959	1
Acsl3	0.156728	0.195	0.321	0.000448666	1
Lsm2	0.199258	0.332	0.461	0.000448705	1
Pard3	0.0667859	0.011	0.062	0.000450176	1
Slirp	0.212445	0.381	0.51	0.000450998	1
Gm8773	0.12476	0.074	0.165	0.000451776	1
Fut8	0.162359	0.216	0.346	0.000452709	1
Zcchc17	0.178404	0.655	0.778	0.000452921	1
Gpatch4	0.166465	0.184	0.305	0.00045341	1
mt-Co3	-0.0996671	1	1	0.000454661	1
Ndrg1	0.151873	0.118	0.222	0.000455846	1
Lsm14b	0.183283	0.219	0.35	0.000455954	1
Gas1	0.127509	0.055	0.136	0.000460468	1
March6	0.196009	0.219	0.342	0.000460806	1
Mrpl24	0.184842	0.266	0.395	0.000461117	1
Tmem126a	0.201083	0.427	0.56	0.000462483	1
Taf9b	0.0923485	0.036	0.107	0.000464125	1
4933427D14Rik	0.0923485	0.036	0.107	0.000464125	1
Tmsb15b1	0.153812	0.156	0.272	0.000466752	1
Csnk2b	0.187155	0.562	0.687	0.000466776	1
Cep170b	0.137224	0.107	0.21	0.000467562	1
Mbd3	0.194201	0.501	0.654	0.000469802	1
Lrfn1	0.153617	0.088	0.181	0.000469969	1
Dusp15	0.111325	0.044	0.119	0.000471657	1
Ppp2r2d	0.158964	0.2	0.325	0.000473777	1
Hist1h1c	0.121598	0.126	0.239	0.000478618	1
Maged2	0.162641	0.405	0.551	0.000479884	1
Qdpr	0.161826	0.164	0.28	0.000482018	1
Amz2	0.169272	0.381	0.527	0.000483817	1
Slc8a2	0.0992336	0.041	0.115	0.000484612	1
Pitpna	0.174597	0.356	0.502	0.000485747	1
Twf1	0.152985	0.184	0.305	0.000485809	1
Gnai3	0.167821	0.249	0.383	0.000486224	1
Rab5b	0.144158	0.142	0.255	0.000488661	1
Nos3	0.0467311	0	0.033	0.000491319	1
Trim68	0.0467311	0	0.033	0.000491319	1
Glra3	0.0467311	0	0.033	0.000491319	1
Chst5	0.0467311	0	0.033	0.000491319	1
Cyb561	0.141452	0.093	0.189	0.000491505	1
Rap1b	0.176308	0.532	0.675	0.000492811	1
Txnrd3	0.135923	0.104	0.206	0.00049403	1
Ppm1a	0.15586	0.137	0.247	0.000495594	1
Ralyl	0.174648	0.564	0.72	0.000496857	1
Snx15	0.17402	0.216	0.342	0.00049755	1
Zbtb12	0.100756	0.041	0.115	0.000498045	1
Tspan4	0.160462	0.142	0.255	0.0004992	1
Mbp	0.107543	0.044	0.119	0.000499391	1
Lpcat1	0.138229	0.132	0.243	0.000501788	1
Adam19	0.095442	0.038	0.111	0.000504364	1
Ncor1	0.182772	0.419	0.564	0.00050552	1
Nln	0.109027	0.049	0.128	0.000505698	1
Apc2	0.191305	0.34	0.469	0.00050631	1
Haus6	0.0542339	0.003	0.041	0.000507039	1
Ablim3	0.0542339	0.003	0.041	0.000507039	1
Mrpl51	0.177587	0.444	0.593	0.000507557	1
Rab8b	0.0828273	0.022	0.082	0.000508474	1
Znhit6	0.115467	0.068	0.156	0.000514262	1
1110017D15Rik	0.125177	0.055	0.136	0.000517653	1
Atp5k	0.171365	0.726	0.84	0.00051834	1
Leprotl1	0.198433	0.214	0.329	0.000520105	1
Nop10	0.198308	0.858	0.934	0.000523009	1
Fmn2	0.114872	0.058	0.14	0.000523164	1
Tpm4	0.204585	0.219	0.333	0.000531176	1
Smarca4	0.176152	0.408	0.556	0.000534974	1
Sepw1	0.130573	1	1	0.000536522	1
C130071C03Rik	0.180873	0.268	0.399	0.00053897	1
Rragc	0.162713	0.142	0.251	0.000539229	1
Eif4a3	0.166832	0.247	0.383	0.000540093	1
Bcl2l1	0.196356	0.26	0.379	0.000543742	1
Serinc3	0.16297	0.173	0.288	0.000545385	1
Gns	0.114036	0.063	0.148	0.000545597	1
Rsl1d1	0.132944	0.389	0.551	0.000545766	1
Cdh15	0.108106	0.068	0.156	0.000549265	1
Psmd6	0.188168	0.427	0.56	0.000549422	1
Ufc1	0.188599	0.515	0.646	0.000551276	1
Gm9885	0.10001	0.049	0.128	0.000553919	1
Snapc3	0.18767	0.216	0.337	0.000555785	1
Dapk2	-0.0785123	0.058	0.004	0.000556512	1	Hollow	YES
Chmp1a	0.180591	0.493	0.638	0.000559191	1
Mcts1	0.151216	0.564	0.728	0.000561738	1
Isy1	0.103008	0.055	0.136	0.000562659	1
Ift57	0.181831	0.345	0.481	0.000565348	1
Lrrc3b	0.0898942	0.025	0.086	0.000568235	1
Mrpl52	0.200828	0.479	0.609	0.000570314	1
Myl6	0.176688	0.975	0.984	0.000570865	1
Manf	0.178639	0.532	0.675	0.000576357	1
Thrap3	0.154128	0.301	0.44	0.000577084	1
Chordc1	0.128401	0.099	0.198	0.000577891	1
Pafah1b2	0.161819	0.545	0.7	0.000580974	1
Sel1l	0.18062	0.189	0.305	0.000581301	1
Sult4a1	0.215475	0.551	0.695	0.00058339	1
Ttyh3	0.204627	0.304	0.424	0.000585777	1
Mdp1	0.167923	0.268	0.403	0.000586786	1
Sh3bgrl	0.183584	0.468	0.63	0.000587304	1
Gprasp1	0.195395	0.238	0.362	0.000588433	1
Llph	0.184755	0.468	0.597	0.000589779	1
Mycl	0.193387	0.332	0.465	0.000590806	1
Arhgap23	0.129306	0.093	0.189	0.000594149	1
Dpy30	0.171181	0.556	0.7	0.000595517	1
Ebpl	0.196597	0.304	0.432	0.000597711	1
Ppa1	0.19157	0.548	0.687	0.00059862	1
Bod1	0.131462	0.118	0.222	0.00060231	1
Gprasp2	0.159037	0.121	0.222	0.000604269	1
Tspan31	0.160073	0.197	0.321	0.00060668	1
Sel1l3	0.135191	0.088	0.181	0.000607945	1
Gdpd1	0.124374	0.408	0.572	0.000611614	1
Tmem246	0.190004	0.356	0.494	0.000612162	1
Large	0.119919	0.096	0.193	0.000612547	1
Panx1	0.178416	0.186	0.3	0.000616786	1
Lars	0.140094	0.156	0.272	0.000619522	1
Dcaf7	0.16297	0.167	0.28	0.000620395	1
Nup62	0.0986032	0.074	0.165	0.000622014	1
Cdipt	0.151521	0.29	0.428	0.00062552	1
Trib2	0.146368	0.132	0.239	0.000628723	1
Sema3c	0.085746	0.008	0.053	0.000631396	1
Syncrip	0.180684	0.364	0.51	0.000631564	1
Cox7a2	0.18081	0.984	0.992	0.000635329	1
B3gat3	0.148409	0.205	0.333	0.000635511	1
Rpl37a	0.144358	0.986	0.996	0.000636941	1
Strbp	-0.241884	0.707	0.654	0.000640492	1
St3gal1	0.0633782	0.008	0.053	0.000643016	1
Strip1	0.148819	0.222	0.35	0.000643155	1
Wdr18	0.178181	0.384	0.514	0.00064859	1
Sox5	0.130645	0.09	0.185	0.000648712	1
Ubl5	0.183545	0.868	0.926	0.000649393	1
C77370	0.177926	0.279	0.407	0.000650401	1
Mrps18c	0.180516	0.559	0.704	0.000650442	1
Gm9843	0.175098	0.214	0.333	0.000658279	1
Fez2	0.195596	0.23	0.35	0.000665801	1
Pmvk	0.207425	0.419	0.56	0.000672048	1
Ccdc106	0.187055	0.2	0.313	0.000674364	1
Paqr4	0.15433	0.121	0.222	0.000680806	1
Pgs1	0.176893	0.271	0.395	0.000681745	1
Mrps14	0.167962	0.449	0.613	0.000681887	1
Vps41	0.153095	0.277	0.416	0.000683779	1
Fdx1	0.118553	0.096	0.193	0.000684412	1
Satb1	-0.276339	0.712	0.597	0.000688712	1
Commd9	0.147993	0.301	0.449	0.000691654	1
Tmod2	0.181973	0.649	0.774	0.000692546	1
Rpl24	0.144311	1	1	0.000696942	1
Hspa4	0.157075	0.266	0.399	0.000698622	1
Oca2	0.0795708	0.016	0.07	0.000701593	1
Nrxn3	0.0795708	0.016	0.07	0.000701593	1
Scd1	0.0795708	0.016	0.07	0.000701593	1
Gspt2	0.0876337	0.03	0.095	0.000704485	1
Memo1	0.120241	0.085	0.177	0.000712253	1
Smu1	0.140792	0.282	0.428	0.000716669	1
Me1	0.149988	0.09	0.181	0.000721496	1
Rbmx	0.195303	0.345	0.477	0.000721772	1
Evi5l	0.14292	0.129	0.235	0.000727927	1
AI593442	-0.277359	0.647	0.551	0.000728723	1
Nap1l4	0.164576	0.542	0.7	0.000730432	1
4930453N24Rik	0.134615	0.101	0.198	0.000735205	1
Fam149a	0.0946086	0.033	0.099	0.000737599	1
Rell2	0.177745	0.422	0.551	0.000738644	1
Ctnnbip1	0.165113	0.627	0.778	0.000739317	1
Vrk3	0.115222	0.085	0.177	0.00074551	1
Rab5a	0.145065	0.466	0.646	0.000747395	1
Nipsnap1	0.139222	0.312	0.461	0.00074761	1
Mapk8ip2	0.172811	0.342	0.481	0.000748519	1
Abhd17b	0.154989	0.164	0.276	0.000757263	1
Dnpep	0.165161	0.416	0.556	0.000762003	1
Erh	0.148189	0.989	0.984	0.000767385	1
Supt4a	0.209151	0.493	0.597	0.000769216	1
Tnks2	0.155548	0.129	0.23	0.000774504	1
Akirin2	0.152809	0.164	0.276	0.00077533	1
Mrto4	0.163932	0.279	0.412	0.000777992	1
Cib2	-0.191683	0.877	0.798	0.000783168	1
Rps4x	0.150841	1	1	0.000783636	1
Nup50	0.131858	0.126	0.23	0.000784399	1
Dctn5	0.139222	0.321	0.465	0.000784738	1
Ube2k	0.169472	0.658	0.79	0.000790615	1
Actr10	0.191157	0.334	0.457	0.000792695	1
Mrpl36	0.162936	0.375	0.523	0.000793573	1
Adrbk2	0.115117	0.041	0.111	0.000793575	1
Snrpn	-0.13852	1	0.996	0.000794374	1
Zdhhc3	0.17994	0.375	0.506	0.000796339	1
Nlgn3	0.152709	0.216	0.337	0.000803021	1
Itpa	0.18088	0.37	0.502	0.000807022	1
Nip7	0.167678	0.227	0.346	0.000810059	1
Lhpp	0.11631	0.063	0.144	0.000811943	1
Chmp3	0.152003	0.17	0.284	0.000812444	1
Lonrf1	0.0977017	0.038	0.107	0.000813253	1
Spock1	0.164188	0.266	0.399	0.000815821	1	Septa
Tlk1	0.164983	0.14	0.243	0.00081943	1
Rita1	0.126175	0.104	0.202	0.000820695	1
1700019D03Rik	0.0867003	0.019	0.074	0.000822507	1
Mib1	0.15364	0.148	0.255	0.000822531	1
Dst	0.15609	0.433	0.584	0.000825847	1
Clec2l	0.114872	0.06	0.14	0.000827371	1
Arl6	0.157459	0.175	0.288	0.000829416	1
Ercc8	0.118852	0.074	0.16	0.000831325	1
Trp53inp2	0.151893	0.258	0.391	0.000831854	1
Ssr3	0.191846	0.225	0.337	0.00083189	1
Kcnv1	0.10605	0.044	0.115	0.000834514	1
Tbcc	0.147277	0.214	0.337	0.000842811	1
Slco3a1	0.114036	0.066	0.148	0.000843071	1
Ajap1	0.132909	0.093	0.185	0.000844322	1
Acot13	0.147176	0.315	0.457	0.000844655	1
Ppp1r35	0.158964	0.203	0.321	0.000846251	1
Tmem57	0.170954	0.315	0.444	0.000847619	1
Secisbp2	0.113213	0.071	0.156	0.000850079	1
Nckap1	0.218946	0.356	0.49	0.000850566	1
Pde4b	0.0756873	0.019	0.074	0.000850753	1
Spag6l	0.0756873	0.019	0.074	0.000850753	1
Rab5c	0.139079	0.523	0.695	0.000854289	1
Slc29a1	0.130082	0.14	0.247	0.000855781	1
Gabbr1	0.188391	0.468	0.593	0.000862062	1
Psma6	0.190423	0.666	0.782	0.000862065	1
Cmc4	0.113569	0.145	0.259	0.000865111	1
Ap3m1	0.133683	0.101	0.198	0.000869182	1
Hprt	0.181005	0.512	0.634	0.000869284	1
Anp32b	0.146601	0.175	0.292	0.000871753	1
Gtpbp8	0.111782	0.068	0.152	0.000873693	1
Cd276	0.109027	0.044	0.115	0.000875393	1
Cdc34	0.111149	0.06	0.14	0.000877159	1
Rabac1	0.186178	0.644	0.761	0.000881578	1
1700037H04Rik	0.145185	0.178	0.292	0.000881767	1
Slc25a4	0.124139	0.997	1	0.0008859	1
Cyp4x1	0.0706904	0.011	0.058	0.000886962	1
Hn1l	0.134985	0.115	0.214	0.000890372	1
Ccdc32	0.164945	0.279	0.403	0.000891176	1
Riiad1	0.135191	0.088	0.177	0.000892289	1
Spcs3	0.133147	0.134	0.239	0.00089403	1
Prkaa2	0.129733	0.096	0.189	0.000896119	1
Arhgap10	0.0616573	0.005	0.045	0.00089909	1
Ccdc120	0.105265	0.049	0.123	0.000900227	1
Irf2bp1	0.14108	0.115	0.214	0.000901557	1
Serpine2	0.180948	0.405	0.535	0.000902623	1
Antxr2	0.0559886	0.005	0.045	0.000904989	1
Slc27a3	0.102268	0.044	0.115	0.000905	1
Gsk3b	-0.242121	0.885	0.856	0.000905957	1
Gkap1	0.0984967	0.049	0.123	0.000907897	1
Commd4	0.177064	0.553	0.671	0.000911859	1
Mcu	0.149608	0.112	0.21	0.000912515	1
Faim2	0.167315	0.137	0.239	0.000918231	1
Rpl30	0.186265	0.896	0.971	0.000920235	1
Kif5a	0.199299	0.389	0.506	0.00092084	1
Zbtb20	-0.285919	0.356	0.243	0.000924918	1	Hollow
Myeov2	0.17877	0.778	0.856	0.000925358	1
Nono	0.162555	0.529	0.679	0.000925526	1
Trappc2l	0.165152	0.592	0.737	0.00092781	1
Nif3l1	0.119608	0.121	0.222	0.000929429	1
Golga7	0.155057	0.468	0.609	0.000931306	1
Gucy1b3	0.17786	0.578	0.712	0.000940418	1
Slc40a1	-0.116161	0.099	0.029	0.000940995	1
Gm15417	-0.101116	0.112	0.037	0.000943269	1
Emd	0.19158	0.351	0.481	0.000945435	1
Asl	0.0883024	0.022	0.078	0.000945556	1
G6pdx	0.103731	0.063	0.144	0.000948542	1
Lonrf2	0.152445	0.153	0.259	0.00095129	1
Rab8a	0.192825	0.304	0.428	0.000953221	1
Ntm	-0.16899	0.951	0.901	0.000958084	1
Ddx39b	0.183043	0.444	0.56	0.000963792	1
Pfdn1	0.158627	0.732	0.811	0.000967959	1
Fer	0.0947348	0.047	0.119	0.000972219	1
Trim44	0.157629	0.255	0.383	0.000973798	1
Eif2s1	0.164542	0.332	0.469	0.000976105	1
Vps9d1	0.143592	0.192	0.309	0.000978664	1
Vstm2b	0.0878886	0.044	0.115	0.000984642	1
Ppp1r11	0.196392	0.551	0.654	0.000984935	1
Cspg5	-0.162501	0.901	0.86	0.000989578	1
Gars	0.173554	0.436	0.584	0.000992871	1
Smn1	0.140922	0.214	0.337	0.00100173	1
Snrpd1	0.185438	0.633	0.749	0.00100333	1
Aamdc	0.158606	0.17	0.28	0.00100455	1
6330403A02Rik	0.0789647	0.022	0.078	0.00100754	1
Pdgfa	0.189378	0.247	0.358	0.00101364	1
Tmem50b	0.149608	0.123	0.222	0.00101545	1
Ctps	0.137414	0.29	0.428	0.00102248	1
Smpd3	0.181137	0.419	0.551	0.00102322	1
Zmynd19	0.120241	0.088	0.177	0.00102431	1
Pbx1	0.19592	0.567	0.708	0.00102501	1
Trmt112	0.162936	0.367	0.502	0.00102618	1
Pmpcb	0.13977	0.216	0.337	0.00102659	1
Ppp2r5d	0.133147	0.132	0.235	0.00103002	1
Chmp2b	0.194796	0.342	0.465	0.00103133	1
Clvs2	0.161436	0.132	0.23	0.00103217	1
Pantr1	-0.179815	0.992	0.984	0.00103261	1
Dnajc9	0.162605	0.244	0.366	0.0010457	1
Slain2	0.192747	0.271	0.391	0.00107008	1
Dleu7	0.167443	0.164	0.272	0.0010717	1
Qtrt1	0.141965	0.142	0.247	0.0010745	1
Exoc5	0.16805	0.299	0.424	0.00107638	1
Slain1	0.146874	0.101	0.193	0.00107845	1
Mrpl33	0.173084	0.666	0.802	0.00108259	1
Dnajc5	0.153287	0.584	0.708	0.00108433	1
Kat2a	0.178244	0.222	0.333	0.00108574	1
Adarb1	0.143888	0.126	0.226	0.00109258	1
Tenm4	0.127509	0.079	0.165	0.0010935	1
Cnot1	0.139481	0.101	0.193	0.00110821	1
Zrsr2	0.141908	0.268	0.395	0.00112121	1
Cers5	0.161721	0.26	0.383	0.00112137	1
Bub1b	0.0409718	0	0.029	0.00112413	1
Gramd2	0.0409718	0	0.029	0.00112413	1
Chd5	0.127925	0.156	0.267	0.00112689	1
Ddx54	0.146831	0.189	0.305	0.00113172	1
Gm42865	0.0542339	0.003	0.037	0.00113701	1
Mark2	0.134081	0.175	0.288	0.00113937	1
Tmem200c	0.125662	0.071	0.152	0.00113998	1
Tinagl1	0.0485202	0.003	0.037	0.00114114	1
Sostdc1	0.0485202	0.003	0.037	0.00114114	1
Hnrnpm	0.1695	0.471	0.605	0.00114207	1
Vav2	0.072367	0.014	0.062	0.00114306	1
Aldh3a2	0.072367	0.014	0.062	0.00114306	1
Slc38a1	0.170016	0.337	0.457	0.0011443	1
Rpl35	0.176777	0.948	0.963	0.0011517	1
Nudt10	0.138844	0.121	0.218	0.00115503	1
Galk1	0.17507	0.23	0.342	0.00115753	1
Qsox2	0.0667859	0.014	0.062	0.00115814	1
Fstl5	0.0667859	0.014	0.062	0.00115814	1
Tmem178b	0.160481	0.238	0.358	0.00115898	1
Fbxw5	0.175238	0.419	0.543	0.001161	1
Tmem181a	0.152067	0.132	0.23	0.00116274	1
Ptrhd1	0.18309	0.255	0.37	0.00117469	1
Man1b1	0.123486	0.104	0.198	0.00117657	1
Rpl11	0.151697	0.997	0.996	0.00117711	1
Efcab1	0.0860419	0.027	0.086	0.00118052	1
Ccdc34	0.174745	0.321	0.449	0.0011806	1
Snrnp25	0.137379	0.164	0.276	0.00118113	1
Ppp1r2	0.172805	0.375	0.502	0.00118191	1
Limd2	0.191383	0.507	0.621	0.00118412	1
Akt3	0.145388	0.148	0.251	0.00118778	1
Cetn3	-0.205688	0.915	0.864	0.00118942	1
Minos1	0.171903	0.732	0.835	0.00119911	1
Pa2g4	0.177337	0.351	0.481	0.00119982	1
Zc4h2	0.161919	0.175	0.284	0.00120006	1
Snx6	0.161389	0.307	0.432	0.00120106	1
Psma4	0.166855	0.696	0.823	0.00120948	1
Hilpda	0.139481	0.173	0.284	0.0012123	1
Derl1	0.126175	0.104	0.198	0.0012158	1
Aldh2	0.110978	0.079	0.165	0.00121987	1
Ilkap	0.165846	0.405	0.535	0.00122277	1
Xpo7	0.128401	0.099	0.189	0.0012233	1
Cdc42	0.168804	0.975	0.979	0.00122439	1
Eif2s2	0.160061	0.852	0.897	0.00122875	1
Lancl1	0.146574	0.285	0.416	0.00122905	1
1110008P14Rik	0.158158	0.734	0.831	0.00123687	1
Borcs8	0.164828	0.274	0.395	0.00123785	1
Fkbp2	0.185442	0.46	0.576	0.00123921	1
mt-Nd1	0.111899	1	1	0.00124012	1
Pds5b	0.127509	0.129	0.23	0.0012417	1
Rpl27	0.187164	0.729	0.819	0.00124807	1
Hnrnpa0	0.157506	0.249	0.37	0.00125706	1
Rps6ka3	0.113213	0.074	0.156	0.00126351	1
Anapc15	0.143197	0.159	0.263	0.00126441	1
Pabpc1	0.192854	0.83	0.909	0.00126559	1
Prr3	0.143459	0.225	0.346	0.00126944	1
Sptan1	0.177033	0.523	0.654	0.00127016	1
Oprl1	0.106567	0.085	0.173	0.00127155	1
Ppp3r1	0.172525	0.644	0.774	0.00127403	1
Gbas	0.154829	0.145	0.247	0.00127707	1
Ech1	0.161634	0.151	0.251	0.00128172	1
Atp13a2	0.163132	0.364	0.514	0.00129095	1
Hmbs	0.119814	0.142	0.247	0.00130121	1
Klhl4	0.11631	0.063	0.14	0.00130439	1
Psd3	0.206988	0.296	0.407	0.00130737	1
Psenen	0.166026	0.526	0.658	0.00131702	1
1500011K16Rik	0.194076	0.315	0.432	0.00131869	1
Syndig1l	0.121115	0.142	0.247	0.00132189	1
Mrps28	0.154588	0.266	0.391	0.00132534	1
Slc35a1	0.129213	0.142	0.247	0.00132636	1
Slc35f1	0.173965	0.244	0.358	0.00133884	1
Xpa	0.140684	0.162	0.272	0.00134147	1
Wbp11	0.134976	0.389	0.535	0.00134236	1
Arf6	0.157974	0.211	0.325	0.00134423	1
Tes	0.111149	0.063	0.14	0.00135284	1
Rhov	0.107435	0.066	0.144	0.00136627	1
Myadm	0.0577316	0.008	0.049	0.00136675	1
Yeats4	0.179282	0.353	0.473	0.00136738	1
Bambi	0.0850878	0.016	0.066	0.00137177	1
Rcc2	0.103035	0.038	0.103	0.00137208	1
9530059O14Rik	0.0838019	0.033	0.095	0.00137408	1
Nefm	0.111325	0.044	0.111	0.00137586	1
Gna11	0.179543	0.416	0.539	0.00137961	1
Mmadhc	0.161044	0.296	0.42	0.00138796	1
Iscu	0.182027	0.433	0.543	0.00138833	1
Frrs1l	0.153044	0.238	0.354	0.00138913	1
Lrrc3	0.0740326	0.016	0.066	0.00139231	1
Cab39	0.178189	0.227	0.337	0.00139518	1
Rps20	0.173817	0.942	0.979	0.00140306	1
Anp32e	0.14613	0.173	0.28	0.00140762	1
Tmem229b	-0.191428	0.395	0.28	0.00140777	1
Wdr47	0.18503	0.375	0.502	0.00141004	1
Acin1	0.164813	0.37	0.498	0.00141304	1
Ankrd50	0.0684731	0.016	0.066	0.00141309	1
Ccne1	0.0684731	0.016	0.066	0.00141309	1
Mpi	0.137955	0.153	0.259	0.00141894	1
Rpl10-ps3	0.130225	0.088	0.173	0.00142103	1
Nsmce1	0.143574	0.263	0.391	0.00142139	1
Tex261	0.144496	0.285	0.412	0.0014311	1
Spsb4	0.119308	0.126	0.226	0.00143179	1
Poldip3	0.106657	0.068	0.148	0.00143206	1
PISD	-0.279499	0.677	0.626	0.00143333	1
Gpr137b-ps	0.0853937	0.036	0.099	0.00143641	1
Rbm4	0.0853937	0.036	0.099	0.00143641	1
Hdgfrp2	0.154734	0.247	0.37	0.00144236	1
Shtn1	0.190751	0.447	0.564	0.00144398	1
Vars	0.139166	0.129	0.226	0.00144542	1
Sv2b	0.0923485	0.038	0.103	0.00144636	1
Armc1	0.144422	0.501	0.646	0.00145565	1
Copg1	0.168362	0.375	0.506	0.00145588	1
Ptpre	0.100756	0.044	0.111	0.00145742	1
Kcnmb4	0.171903	0.227	0.337	0.00146115	1
Kctd15	0.103008	0.058	0.132	0.00146361	1
Nf2	0.142528	0.151	0.255	0.00146468	1
Wrb	0.15644	0.252	0.37	0.00146729	1
Atp5s	0.0939001	0.041	0.107	0.00147899	1
Gstm4	0.107543	0.044	0.111	0.00148611	1
Ift43	0.10648	0.104	0.198	0.00148617	1
Snapc4	0.102268	0.044	0.111	0.00148883	1
Eif3i	0.205261	0.548	0.679	0.00149604	1
Nav1	0.166219	0.616	0.728	0.00150169	1
B3gat1	0.124357	0.09	0.177	0.00150528	1
Gm10053	0.0984967	0.049	0.119	0.00151011	1
Ube2f	0.140333	0.236	0.354	0.00151495	1
Txnip	0.0885469	0.038	0.103	0.00151817	1
Ctnnbl1	0.141463	0.23	0.35	0.00151958	1
Zfp24	0.10788	0.101	0.193	0.00152075	1
Ralbp1	0.147934	0.342	0.477	0.00152798	1
Plppr4	0.175972	0.252	0.366	0.00153172	1
Smad1	0.164386	0.208	0.317	0.00153583	1
Tarsl2	0.0992749	0.058	0.132	0.00154479	1
Clu	0.168657	0.184	0.292	0.00154697	1
RP23-231J2.1	0.0739889	0.033	0.095	0.00154767	1
Rab1b	0.170776	0.162	0.259	0.00155024	1
Mok	0.0901086	0.041	0.107	0.00155353	1
Pdcd5	0.177827	0.805	0.901	0.0015795	1
Hspa2	-0.155564	0.142	0.062	0.00159553	1
Cyb5r3	0.141401	0.255	0.379	0.00159675	1
Sstr2	0.110342	0.06	0.136	0.00159693	1
Med9	0.130408	0.162	0.267	0.00160676	1
Pard6a	0.170166	0.408	0.539	0.00160684	1
Fam162a	0.146149	0.258	0.379	0.00161221	1
Rims4	0.142756	0.096	0.181	0.00161287	1
Cct5	0.142745	0.699	0.827	0.00161352	1
Gm10073	0.132628	0.142	0.243	0.00161395	1
Grp	-0.172568	0.118	0.045	0.0016161	1
Ccdc53	0.111602	0.09	0.177	0.00161718	1
Rab1a	0.156839	0.581	0.7	0.00161762	1
Wdr73	0.119086	0.112	0.206	0.00162347	1
Tspan7	0.144981	0.458	0.584	0.00162477	1
1300002E11Rik	0.14613	0.175	0.28	0.00163179	1
Rapgef1	0.146119	0.132	0.226	0.00164071	1
Nubp1	0.114759	0.118	0.214	0.00164348	1
Dnajc18	0.130645	0.101	0.189	0.00164697	1
Usp27x	0.0701492	0.019	0.07	0.00165209	1
Gm9774	0.0701492	0.019	0.07	0.00165209	1
Fntb	0.0948564	0.063	0.14	0.00165685	1
Nucks1	0.135759	0.586	0.745	0.0016573	1
Txnl1	0.1694	0.427	0.56	0.00166009	1
Pdzd4	0.15659	0.192	0.3	0.00166702	1
Bmpr2	0.130336	0.189	0.3	0.00166809	1
Hist1h2bc	0.232323	0.238	0.346	0.00167964	1
Map2	0.18978	0.655	0.794	0.00167984	1
Rabif	0.157547	0.332	0.453	0.00167984	1
Tceal3	0.181375	0.329	0.444	0.00169099	1
Nagk	0.141471	0.342	0.481	0.00169622	1
Hcn3	0.0872403	0.052	0.123	0.00172069	1
2010107G23Rik	0.160834	0.425	0.551	0.00172848	1
Agap3	0.155452	0.186	0.292	0.00174087	1
Stmn1	0.0921096	1	1	0.00174121	1
Trim24	0.118852	0.082	0.165	0.00174233	1
Katnb1	0.162359	0.222	0.333	0.00175679	1
Gm3739	0.110978	0.082	0.165	0.00175875	1
Rps26	0.158034	0.97	0.979	0.00176154	1
Ppp1r12b	0.114635	0.079	0.16	0.00176528	1
Papola	0.136547	0.364	0.494	0.00176591	1
Ankrd11	0.113399	0.112	0.206	0.00176702	1
Ppp2cb	0.159079	0.219	0.329	0.00177289	1
Glul	-0.216328	0.581	0.486	0.00177823	1
Armcx2	0.129467	0.216	0.333	0.00178185	1
Tsen15	0.139802	0.115	0.206	0.00178552	1
Opcml	0.20693	0.734	0.831	0.00178768	1
Snrnp70	0.135833	0.364	0.51	0.00180401	1
Cxxc5	-0.0763348	0.058	0.008	0.0018041	1
BC003965	0.166874	0.266	0.383	0.00181184	1
Anapc10	0.13978	0.173	0.28	0.00181618	1
Eef1e1	0.148308	0.496	0.646	0.00182806	1
Ankrd13a	0.0773313	0.022	0.074	0.00183563	1
Isoc1	0.12476	0.074	0.152	0.00183853	1
Asph	-0.262726	0.523	0.424	0.00183891	1
Nudt9	0.131839	0.288	0.416	0.00183918	1
Map1lc3b	-0.178595	0.959	0.918	0.00184212	1
Syn1	0.165389	0.452	0.576	0.00185029	1
Reep6	0.0594631	0.011	0.053	0.0018511	1
Cox8a	-0.153307	0.997	0.992	0.00186043	1
Ggct	0.114187	0.107	0.198	0.00186572	1
Scrib	0.0718143	0.022	0.074	0.0018687	1
Got2	0.139481	0.342	0.486	0.00187506	1
Idnk	0.154146	0.17	0.272	0.00188131	1
Msrb2	-0.175931	0.271	0.169	0.00188911	1
Cdc23	0.156306	0.178	0.28	0.00189379	1
Gdap1	0.157075	0.288	0.407	0.00189492	1
Cfl2	0.155267	0.638	0.765	0.0018999	1
Lsm12	0.150645	0.173	0.276	0.00190505	1
Zfp414	0.137633	0.151	0.251	0.00192139	1
Sh3gl3	0.166745	0.26	0.37	0.00193107	1
Rpp21	0.112288	0.529	0.704	0.0019329	1
Fbxo44	0.128766	0.153	0.255	0.00193367	1
Slc25a11	0.166407	0.342	0.461	0.00193418	1
Zfp90	0.153465	0.142	0.239	0.00194759	1
Bscl2	0.152619	0.252	0.37	0.00195191	1
Bcl10	0.135492	0.159	0.259	0.00195878	1
1500035N22Rik	0.142546	0.318	0.444	0.00197131	1
Inpp5d	0.0502975	0.005	0.041	0.00197431	1
Eda	0.0502975	0.005	0.041	0.00197431	1
Ddx58	0.0502975	0.005	0.041	0.00197431	1
Palm2	0.0502975	0.005	0.041	0.00197431	1
Nrg1	0.0502975	0.005	0.041	0.00197431	1
Diaph3	0.0502975	0.005	0.041	0.00197431	1
Syce2	0.188129	0.301	0.407	0.001977	1
Mageh1	0.154393	0.356	0.481	0.00198157	1
Rps6	0.143064	0.995	1	0.00198318	1
Dhcr24	0.151945	0.222	0.333	0.00198443	1
Usp5	0.174862	0.274	0.387	0.00198568	1
Cat	0.152537	0.205	0.313	0.00199727	1
Necap1	0.135619	0.307	0.44	0.00200081	1
Hnrnpab	0.180596	0.614	0.72	0.00200799	1
Hnrnpa3	0.186467	0.699	0.848	0.00201365	1
Chchd2	0.113276	1	1	0.00202426	1
Ydjc	0.153695	0.301	0.424	0.00202563	1
Pgam5	0.176811	0.285	0.399	0.00203395	1
Lrrc24	0.108106	0.074	0.152	0.00203604	1
Ormdl3	0.13259	0.299	0.432	0.00204176	1
Zyg11b	0.178081	0.249	0.354	0.00204339	1
Zfp575	0.129258	0.115	0.206	0.00205285	1
Gnb1l	0.0734687	0.025	0.078	0.00205917	1
Kcnc3	0.119608	0.121	0.214	0.00206583	1
Ppp2r2c	0.166291	0.46	0.588	0.00206908	1
Osgep	0.145469	0.222	0.337	0.00208041	1
Mrps23	0.140607	0.244	0.362	0.00208414	1
Phb	0.156796	0.332	0.453	0.00208597	1
Med25	0.177337	0.362	0.477	0.00208673	1
Coro1c	0.169417	0.436	0.547	0.00208778	1
Cul1	0.15799	0.351	0.469	0.00208881	1
Tmcc2	0.133222	0.192	0.3	0.00209527	1
Zc3h15	0.152723	0.485	0.617	0.00209548	1
Sfr1	0.157227	0.811	0.864	0.00210492	1
Dnm3	0.150841	0.329	0.461	0.00210978	1
Ppp3cc	0.114036	0.066	0.14	0.00211329	1
Emg1	0.145648	0.452	0.572	0.00212229	1
Arpc4	0.166421	0.674	0.79	0.00212741	1
Stx1a	-0.212226	0.83	0.765	0.00212791	1
Dmtf1	0.120944	0.118	0.21	0.00213024	1
Kctd20	0.13864	0.244	0.362	0.00213713	1
Csnk1g3	0.170836	0.216	0.321	0.00214794	1
Nr1d2	-0.143938	0.252	0.148	0.00215211	1
Nol6	0.107435	0.066	0.14	0.0021546	1
Uri1	0.127895	0.236	0.354	0.00217329	1
Cacng2	0.13864	0.236	0.35	0.00218473	1
Aptx	0.162099	0.195	0.296	0.00222118	1
D430019H16Rik	0.155917	0.279	0.391	0.00222893	1
Ostc	0.164249	0.31	0.428	0.00223024	1
Gm10138	0.106657	0.068	0.144	0.00223363	1
Pigyl	0.151275	0.427	0.56	0.00223437	1
Nop9	0.128401	0.107	0.193	0.00223729	1
Gskip	0.139166	0.137	0.23	0.00223807	1
Mettl14	0.0779265	0.014	0.058	0.00223819	1
Tmem106b	0.0993147	0.074	0.152	0.00223895	1
Gyg	0.175872	0.279	0.387	0.00223949	1
Mul1	0.106657	0.066	0.14	0.00224296	1
Nyap1	0.144879	0.274	0.395	0.00224472	1
Ehd1	0.135754	0.219	0.333	0.00225338	1
Zfp697	0.124061	0.134	0.23	0.00225869	1
Sema6c	0.163932	0.277	0.395	0.00226646	1
Cyb5a	0.180596	0.611	0.741	0.00226749	1
Msl1	0.166234	0.334	0.449	0.00227631	1
Hdac4	0.115222	0.09	0.173	0.00227913	1
Herc3	0.0963516	0.071	0.148	0.00228506	1
Ick	0.129213	0.137	0.235	0.00228724	1
Brap	0.139187	0.203	0.309	0.00228922	1
Btg1	-0.228996	0.647	0.564	0.00229094	1	Hollow
Rap1gap2	0.104493	0.06	0.132	0.00229149	1
Atp9b	0.104493	0.06	0.132	0.00229149	1
Dpp7	0.0667859	0.014	0.058	0.0022963	1
Armc10	0.148279	0.164	0.263	0.00230119	1
Dhx38	0.0821998	0.03	0.086	0.00230542	1
N6amt2	0.145194	0.34	0.465	0.00230936	1
Rps3	0.107114	1	1	0.00232041	1
Arrdc3	0.123229	0.145	0.243	0.00232688	1
Rps2	0.134784	1	1	0.00232798	1
Slc25a3	-0.202716	0.91	0.893	0.00232828	1
Prpf31	0.1534	0.304	0.42	0.00233117	1
Kif3a	0.101052	0.474	0.63	0.00234011	1
Myl6b	0.166832	0.249	0.362	0.00234184	1
Odc1	0.159143	0.359	0.477	0.00234349	1
Ddb1	0.1505	0.299	0.42	0.00234404	1
Med8	0.14543	0.411	0.535	0.00234965	1
Mrps27	0.103008	0.058	0.128	0.00235172	1
Glrb	0.144834	0.353	0.481	0.00235291	1
Hspa4l	0.127509	0.162	0.263	0.00235399	1
Sugt1	0.123404	0.255	0.379	0.00236152	1
Casc4	0.15644	0.255	0.366	0.00237506	1
Pbx4	0.166561	0.214	0.317	0.00238819	1
Ran	0.184394	0.805	0.889	0.00240404	1
Ptprk	0.198487	0.252	0.354	0.00240547	1
Gm6563	0.0838019	0.033	0.091	0.00240736	1
Jph3	0.159217	0.296	0.412	0.00243128	1
Cep70	0.0992336	0.041	0.103	0.00243528	1
Canx	0.171094	0.452	0.564	0.00243783	1
Wdr45b	0.152455	0.249	0.362	0.00244482	1
Snx17	0.130426	0.293	0.416	0.00244532	1
Slc6a6	0.134161	0.405	0.547	0.00244569	1
Rpl29	0.151511	0.978	0.975	0.00245297	1
Siah1a	0.13426	0.208	0.317	0.00246398	1
Fpgs	0.0853937	0.036	0.095	0.00248392	1
Lsm7	0.14745	0.255	0.366	0.00248967	1
Abtb2	-0.0710371	0.047	0.004	0.00248972	1
Arg2	-0.121104	0.156	0.074	0.00249191	1
Tmem263	0.127509	0.14	0.235	0.00250034	1
Arl4c	-0.246599	0.542	0.449	0.00250666	1
Cwc15	0.15222	0.488	0.613	0.00250902	1
Tubgcp3	0.0947348	0.052	0.119	0.00252601	1
Rbm27	0.1416	0.175	0.276	0.00253311	1
Spin1	0.134016	0.386	0.523	0.0025342	1
Wtap	0.137726	0.425	0.564	0.00253503	1
Otud5	0.123486	0.104	0.189	0.00253653	1
Prkar1b	0.143752	0.666	0.811	0.00254035	1
Trappc8	0.0799802	0.036	0.095	0.0025449	1
Nsun2	0.149731	0.23	0.337	0.00254761	1
Sptbn4	0.0932024	0.049	0.115	0.00255795	1
Gm17586	0.0969742	0.044	0.107	0.00255824	1
Rnf128	0.0485202	0.003	0.033	0.00256002	1
Spsb1	0.0427839	0.003	0.033	0.00256927	1
Fam196a	0.0427839	0.003	0.033	0.00256927	1
Has3	0.0427839	0.003	0.033	0.00256927	1
Slc35e3	0.0745463	0.033	0.091	0.00257305	1
Dynlt3	0.159712	0.334	0.449	0.00257994	1
Cpne5	0.162187	0.203	0.305	0.0025837	1
Capn3	0.0351894	0	0.025	0.00258575	1
Zfand4	0.0351894	0	0.025	0.00258575	1
Nr3c2	0.0351894	0	0.025	0.00258575	1
Rec8	0.0351894	0	0.025	0.00258575	1
Grik4	0.0351894	0	0.025	0.00258575	1
Ooep	0.0351894	0	0.025	0.00258575	1
Rcan3	0.0409718	0	0.025	0.00258593	1
Commd8	0.142638	0.301	0.42	0.00258767	1
Dedd	0.111429	0.11	0.198	0.00259403	1
Fbxl20	0.081582	0.036	0.095	0.00259625	1
Tm7sf2	0.0894405	0.052	0.119	0.00260535	1
Cadm3	0.152417	0.515	0.658	0.0026161	1
Lzic	0.140727	0.137	0.23	0.00262158	1
Lss	0.0932024	0.047	0.111	0.00262507	1
Pcdh11x	0.130562	0.11	0.198	0.00262696	1
Acat1	0.161886	0.655	0.77	0.00262925	1
Creb3l1	-0.150025	0.285	0.181	0.00264537	1
Tsen34	0.155057	0.663	0.794	0.00264936	1
Specc1l	0.0863269	0.047	0.111	0.0026523	1
Mknk2	0.0909827	0.052	0.119	0.00265251	1
Slc45a1	0.117716	0.148	0.247	0.00266213	1
Prr7	0.115208	0.556	0.691	0.00267228	1
Add3	0.150242	0.156	0.251	0.00267734	1
Btf3	0.156043	0.921	0.975	0.00268272	1
Ube2l6	0.0740326	0.016	0.062	0.00268994	1
Dzip1	0.106567	0.088	0.169	0.00269856	1
Bptf	0.153044	0.233	0.342	0.00270355	1
Mrpl3	0.154625	0.216	0.321	0.00270979	1
Rp2	0.0684731	0.016	0.062	0.00272902	1
Ttc5	0.138272	0.175	0.276	0.00272924	1
Rgs11	0.0856884	0.052	0.119	0.00273555	1
Glrx5	0.154748	0.704	0.827	0.00274838	1
Arl15	0.127959	0.096	0.177	0.00274875	1
Slc25a5	0.202903	0.819	0.914	0.00274959	1
Ankrd13b	0.166655	0.211	0.313	0.00275924	1
Luc7l	0.117202	0.175	0.28	0.00276172	1
Rbm5	0.147606	0.318	0.432	0.00276272	1
Slc30a10	0.062892	0.016	0.062	0.00276855	1
Ipo8	0.062892	0.016	0.062	0.00276855	1
Stk24	0.062892	0.016	0.062	0.00276855	1
Lmf1	0.062892	0.016	0.062	0.00276855	1
Btf3l4	0.151826	0.449	0.58	0.00276912	1
Sirpa	0.0825552	0.047	0.111	0.00278033	1
Pum2	0.141767	0.321	0.444	0.00278168	1
Zfp574	-0.0968005	0.115	0.045	0.0027824	1
Arpc1a	0.180711	0.652	0.753	0.00278315	1
Naa20	0.166867	0.441	0.56	0.00279642	1
Matr3	-0.213574	0.819	0.753	0.00281677	1
Jarid2	0.117728	0.107	0.193	0.00281739	1
Dnajc4	0.109407	0.085	0.165	0.00281854	1
Anapc1	0.117179	0.101	0.185	0.00282991	1
Usp7	0.110655	0.11	0.198	0.00283074	1
Trappc6b	0.152433	0.627	0.753	0.00283513	1
Rpn1	0.131639	0.181	0.284	0.00284109	1
Mlx	0.122335	0.205	0.317	0.00284882	1
Samm50	0.173758	0.332	0.436	0.00284924	1
Camsap2	0.151769	0.216	0.321	0.00285284	1
Gm42864	0.0577316	0.008	0.045	0.00285705	1
Ubap2l	0.117663	0.345	0.473	0.00287448	1
Mrps6	0.113726	0.181	0.288	0.00287821	1
Rpap1	0.0520629	0.008	0.045	0.00288205	1
Itgb8	0.0520629	0.008	0.045	0.00288205	1
Elp6	0.118302	0.074	0.148	0.00288782	1
BC022687	0.121929	0.14	0.235	0.00289357	1
Dync1i1	0.168419	0.564	0.691	0.0029112	1
Hnrnpl	0.136736	0.337	0.465	0.00291889	1
Ipo7	0.129129	0.186	0.292	0.00292156	1
Prpsap1	0.156555	0.307	0.42	0.0029275	1
Prmt1	0.171126	0.847	0.909	0.0029344	1
Mrpl41	0.177128	0.532	0.621	0.00293579	1
Ankfy1	0.108106	0.077	0.152	0.00293591	1
Tmem128	0.132628	0.148	0.243	0.00296025	1
Eps15	0.118791	0.123	0.214	0.0029606	1
Atox1	0.138019	0.814	0.885	0.0029608	1
Wdr74	0.143574	0.274	0.387	0.0029683	1
Nwd2	0.137246	0.477	0.613	0.00297183	1
Epn1	0.151292	0.616	0.716	0.00297346	1
Slbp	0.140257	0.323	0.444	0.00297369	1
Ptp4a1	0.118511	0.718	0.877	0.00298882	1
Acta1	0.1084	0.123	0.214	0.00299665	1
Plgrkt	0.135833	0.367	0.498	0.0030165	1
Tmem30a	0.152118	0.236	0.342	0.00301672	1
Mrpl14	0.171903	0.49	0.597	0.00301932	1
Srrt	0.15659	0.184	0.28	0.00304139	1
Tra2a	0.12545	0.329	0.457	0.00304956	1
Ict1	0.142787	0.493	0.634	0.00308802	1
Pithd1	0.128735	0.184	0.288	0.00308851	1
Klf16	0.110342	0.071	0.144	0.00309276	1
Nucb1	0.114987	0.099	0.181	0.003102	1
Cabin1	0.111261	0.121	0.21	0.00310522	1
Ttc1	0.10587	0.332	0.465	0.00311192	1
Npc2	0.149832	0.31	0.428	0.003114	1
Cops7b	0.124972	0.153	0.251	0.0031342	1
Bdh1	0.159754	0.518	0.63	0.00314179	1
Ccnc	0.117455	0.121	0.21	0.00316218	1
Zmat1	0.0645896	0.019	0.066	0.00316578	1
Gnl1	0.124738	0.211	0.321	0.00316859	1
Rps6ka2	-0.121104	0.159	0.078	0.00316956	1
Grm2	-0.115206	0.148	0.07	0.0031696	1
Tmem251	0.148198	0.216	0.321	0.00317365	1
Elp2	0.12379	0.175	0.276	0.00318987	1
Rab9	0.109975	0.241	0.362	0.00319865	1
Saysd1	0.14543	0.2	0.3	0.00320949	1
Igfbp5	-0.294934	0.274	0.181	0.00322791	1
Tctex1d2	0.130791	0.175	0.276	0.00323819	1
Epha5	0.162442	0.452	0.576	0.00324425	1
Mcat	0.101513	0.11	0.198	0.00325563	1
Ppia	0.114333	1	1	0.00326026	1
Cacnb1	0.109618	0.156	0.255	0.00326102	1
Daam1	0.137514	0.241	0.35	0.00326804	1
Serpinb6a	0.126652	0.142	0.235	0.00327315	1
Psmg2	0.133368	0.159	0.255	0.00328636	1
Dync1li2	0.148616	0.216	0.321	0.00328974	1
Slc9a3r2	0.162359	0.225	0.325	0.00329349	1
Cdc42ep3	0.140067	0.534	0.654	0.00329665	1
Gm13830	0.103692	0.077	0.152	0.00331605	1
Magee1	0.141401	0.266	0.379	0.00331629	1
Mtpap	0.0963516	0.074	0.148	0.00331649	1
Rp9	0.146692	0.521	0.642	0.00332258	1
Zbtb22	0.0964423	0.082	0.16	0.00332596	1
Fars2	0.11662	0.093	0.173	0.00333775	1
Dpcd	0.159519	0.375	0.486	0.00335744	1
Nfkbib	0.152058	0.288	0.395	0.00335988	1
Zcchc18	0.155763	0.649	0.778	0.00336713	1
Dnajc6	0.115092	0.137	0.23	0.00337128	1
Mef2d	0.14046	0.101	0.181	0.0033746	1
Sec23ip	0.101513	0.071	0.144	0.00338149	1
Nap1l3	0.130875	0.167	0.263	0.00339652	1
Brdt	0.132498	0.17	0.267	0.00342428	1
Gtf3c6	0.113768	0.142	0.235	0.00343056	1
Fam98c	0.102981	0.071	0.144	0.00343124	1
Hibch	0.0718143	0.022	0.07	0.00345021	1
Mrpl12	0.1554	0.649	0.778	0.00345185	1
Timp2	0.146763	0.34	0.461	0.003452	1
Asb8	0.0986537	0.101	0.185	0.00345322	1
G3bp2	0.134872	0.553	0.683	0.00345765	1
Zfp120	0.0948564	0.071	0.144	0.00345771	1
Fez1	-0.129506	0.97	0.942	0.00347266	1
Zfp462	0.133768	0.216	0.325	0.0034774	1
Begain	0.120241	0.088	0.165	0.00347796	1
Dda1	0.171903	0.778	0.848	0.00348606	1
Cuta	0.104547	0.381	0.523	0.00349249	1
Pisd	0.152809	0.17	0.263	0.00350125	1
Mob4	0.131858	0.479	0.609	0.00350669	1
Ubxn4	0.152159	0.345	0.453	0.00352281	1
Psme3	0.116957	0.192	0.296	0.0035294	1
Uqcrh	-0.146451	0.937	0.947	0.00353319	1
Shoc2	0.155017	0.279	0.391	0.00354129	1
Sssca1	0.126843	0.364	0.494	0.00354889	1
Sars	0.141181	0.488	0.63	0.00355333	1
Fam20b	0.101513	0.068	0.14	0.00357404	1
Spryd7	0.134428	0.134	0.222	0.00360006	1
Mrps36	0.14426	0.553	0.683	0.00361966	1
D630045J12Rik	0.105071	0.096	0.177	0.00363937	1
Tyro3	0.0624135	0.022	0.07	0.00364493	1
3110082I17Rik	0.0948564	0.068	0.14	0.00365117	1
Spcs2	0.148005	0.507	0.601	0.00365904	1
Prickle2	0.139481	0.145	0.235	0.00366193	1
Nasp	0.125138	0.337	0.473	0.00367426	1
Ap2a2	0.13068	0.416	0.535	0.00368154	1
Slc38a2	0.145926	0.249	0.354	0.00368345	1
Mmp24	0.128834	0.118	0.202	0.00370084	1
Tnik	0.127509	0.332	0.453	0.00370848	1
Frmd5	0.100037	0.066	0.136	0.0037145	1
Stk19	0.127509	0.219	0.325	0.0037194	1
Slc16a2	0.107435	0.06	0.128	0.00372662	1
Fra10ac1	0.142802	0.173	0.267	0.00372934	1
Gid8	0.102205	0.123	0.214	0.00373383	1
Vwc2l	0.0594631	0.011	0.049	0.00373969	1
Magi1	0.0594631	0.011	0.049	0.00373969	1
Pcdhb7	0.0594631	0.011	0.049	0.00373969	1
Tgfb1i1	0.118265	0.11	0.193	0.00374054	1
Snd1	0.146119	0.129	0.214	0.00374257	1
Ctif	0.0986537	0.096	0.177	0.00374889	1
Ift20	0.140934	0.608	0.72	0.00375079	1
Gpd2	0.16589	0.395	0.51	0.00375324	1
Nkain3	0.0538166	0.011	0.049	0.00377972	1
Galnt9	0.0538166	0.011	0.049	0.00377972	1
Cacna2d3	0.0538166	0.011	0.049	0.00377972	1
Zfp68	0.120372	0.214	0.321	0.00378227	1
Ugcg	0.114987	0.107	0.189	0.00378775	1
Ccp110	0.093352	0.066	0.136	0.0037905	1
Mrps16	0.165113	0.438	0.539	0.00379485	1
D230017M19Rik	0.0679517	0.025	0.074	0.00379975	1
Tst	0.0679517	0.025	0.074	0.00379975	1
Rcan2	0.0956576	0.071	0.144	0.00380258	1
Commd10	0.143614	0.126	0.21	0.00380516	1
Slc4a3	0.136688	0.247	0.354	0.00380618	1
H2afx	0.158097	0.288	0.391	0.00381667	1
Rhob	0.134285	0.348	0.473	0.00381881	1
Mboat2	0.109407	0.09	0.169	0.0038295	1
Prr36	0.113816	0.085	0.16	0.00383573	1
Ado	0.123094	0.277	0.395	0.00384292	1
Prkx	0.0940382	0.06	0.128	0.00386419	1
Fbxo16	0.0940382	0.06	0.128	0.00386419	1
Ap1s2	0.131858	0.123	0.21	0.00386984	1
Snx3	0.173605	0.723	0.782	0.00387435	1
Tnfaip1	0.12389	0.304	0.42	0.00388389	1
Kctd5	0.15278	0.26	0.366	0.00388748	1
Chst10	0.160675	0.266	0.37	0.00389408	1
Rnf40	0.101513	0.09	0.169	0.00389864	1
Ddit3	0.0993531	0.093	0.173	0.00390252	1
Pin4	0.133702	0.348	0.473	0.00391114	1
Cdk4	0.154383	0.578	0.712	0.00393058	1
Gnb1	-0.234288	0.962	0.914	0.00393189	1
Rgs7	0.133497	0.43	0.551	0.00393465	1
Tmbim4	0.14284	0.252	0.358	0.00393647	1
2310022A10Rik	0.10574	0.112	0.198	0.00394353	1
Hip1	0.0751124	0.027	0.078	0.00395519	1
Llgl1	0.0876337	0.03	0.082	0.00395803	1
Ptpn9	0.0925152	0.058	0.123	0.00398314	1
Adcy3	0.0925152	0.058	0.123	0.00398314	1
Trp53bp1	0.117964	0.17	0.267	0.00399663	1
Snx12	0.130483	0.151	0.243	0.00401595	1
Arl8b	0.146592	0.238	0.342	0.00402294	1
Gpn2	0.0696164	0.027	0.078	0.0040346	1
Hspbp1	0.147749	0.329	0.457	0.00403914	1
Nmral1	0.119706	0.079	0.152	0.00405423	1
Cd320	0.0866016	0.06	0.128	0.00406087	1
Clip1	0.123808	0.274	0.387	0.00406244	1
Rps27l	0.139481	0.449	0.572	0.00407874	1
Hacd1	0.134577	0.312	0.428	0.00408209	1
Gapvd1	0.134428	0.249	0.354	0.00409858	1
Nkd2	0.0923354	0.099	0.181	0.00410267	1
Aspscr1	0.131096	0.323	0.44	0.00410709	1
6030419C18Rik	0.0712703	0.027	0.078	0.0041115	1
Dnm1l	0.138142	0.293	0.403	0.00411585	1
Cltc	0.161849	0.458	0.551	0.00413933	1
Grm7	0.118553	0.101	0.181	0.00414948	1
2610301B20Rik	0.0932024	0.049	0.111	0.0041502	1
Haus8	0.102229	0.093	0.173	0.00415529	1
Mmp17	0.108763	0.085	0.16	0.00415805	1
Nap1l2	0.0887825	0.058	0.123	0.0041758	1
Tmem208	0.16461	0.433	0.551	0.00418689	1
Ssb	0.124091	0.493	0.626	0.00418729	1
Synpr	0.0729284	0.005	0.037	0.00420496	1
Ddx42	0.123723	0.241	0.354	0.00421433	1
Tmem35	0.120541	0.233	0.342	0.0042211	1
Alg13	0.0853937	0.033	0.086	0.00423673	1
Capns1	0.186935	0.373	0.473	0.00424343	1
Tmed1	0.119308	0.137	0.226	0.00424759	1
Gamt	0.078368	0.033	0.086	0.00425625	1
Ubr3	0.102217	0.11	0.193	0.00425658	1
Syndig1	-0.229586	0.638	0.572	0.00426	1
Cpeb2	0.0932024	0.049	0.111	0.00427215	1
Dhx16	0.0878886	0.049	0.111	0.00427215	1
Mfsd9	0.0445838	0.005	0.037	0.00428564	1
Hipk2	0.0445838	0.005	0.037	0.00428564	1
Fank1	0.0445838	0.005	0.037	0.00428564	1
Ankrd28	0.0445838	0.005	0.037	0.00428564	1
Spint2	0.0729136	0.03	0.082	0.00429533	1
Add1	0.168081	0.323	0.428	0.00430023	1
Anapc7	0.117455	0.079	0.152	0.0043119	1
Ptpn23	0.0841267	0.052	0.115	0.00431694	1
F8a	0.138867	0.153	0.243	0.00431826	1
Banf1	0.147495	0.726	0.823	0.00432252	1
Tnr	0.114635	0.077	0.148	0.00432696	1
Pamr1	-0.0504898	0.033	0	0.00435228	1	Hollow	YES
Plod3	0.0887825	0.055	0.119	0.00435276	1
Gm17056	0.0947348	0.047	0.107	0.00435402	1
Pdia3	0.13733	0.392	0.506	0.00436911	1
Tulp4	0.120741	0.521	0.634	0.00437887	1
Gna13	0.10444	0.079	0.152	0.00438471	1
Iqsec3	0.0856884	0.052	0.115	0.00438483	1
Gm10020	0.0636167	0.03	0.082	0.00438669	1
Slc9a6	0.140094	0.164	0.255	0.00439286	1
Nfrkb	0.0813459	0.06	0.128	0.00439513	1
Myo5a	0.125262	0.266	0.383	0.00439895	1
Oxct1	0.131847	0.715	0.86	0.00439946	1
Car12	0.0406581	0.005	0.037	0.00441185	1
Fam53a	0.128377	0.129	0.214	0.00442591	1
Gm26917	0.0809737	0.047	0.107	0.00445882	1
Arpp19	0.125143	0.649	0.79	0.00446976	1
Ube2o	0.142155	0.192	0.288	0.00448703	1
Fam171a2	0.129336	0.29	0.407	0.00448744	1
9430038I01Rik	0.134615	0.107	0.185	0.00448941	1
Mkks	0.122099	0.304	0.424	0.00449762	1
Gm10094	0.0761685	0.036	0.091	0.00452065	1
Lst1	0.072367	0.036	0.091	0.00452893	1
Tbc1d14	0.144187	0.249	0.358	0.00453006	1
[truncated: 10,616 more rows]

## Sheet: 4. P7_L4_septa_vs_hollow_DEG
Gene	avg_log2FC	pct.1	pct.2	p_val	p_val_adj	Pattern	Clustering gene
Gap43	0.626393	0.993	1	6.67918e-57	8.97214e-53	Septa	YES
Rorb	-0.862494	0.918	0.557	1.30395e-50	1.7516e-46
Dapk2	-0.782433	0.641	0.177	7.84615e-50	1.05397e-45	Hollow	YES
Cd24a	0.863878	0.628	0.916	1.46837e-49	1.97246e-45	Septa	YES
Sncb	-0.642335	0.995	0.911	2.21092e-47	2.96993e-43
Rgs4	0.571427	0.08	0.443	6.5555e-42	8.806e-38	Septa	YES
Pkia	0.525999	0.434	0.794	8.25588e-33	1.10901e-28	Septa	YES
Met	0.378739	0.021	0.271	2.74662e-31	3.68953e-27	Septa	YES
Ncald	0.508145	0.267	0.608	5.67662e-30	7.62541e-26	Septa	YES
2900055J20Rik	-0.552305	0.956	0.809	1.23797e-29	1.66296e-25
mt-Nd1	0.377954	1	1	2.26693e-27	3.04516e-23
Lypd1	0.442772	0.043	0.279	5.85865e-26	7.86993e-22	Septa	YES
Hmgcs1	0.634763	0.379	0.674	1.09455e-25	1.47031e-21
Rasl10a	-0.519949	0.717	0.424	2.46017e-25	3.30475e-21	Hollow	YES
Tsc22d1	-0.539708	0.941	0.82	2.2072e-24	2.96493e-20
Calm1	-0.293714	1	1	5.64512e-24	7.58308e-20
mt-Atp6	0.294893	1	1	6.55582e-24	8.80643e-20
Cacng3	0.317443	0.034	0.246	6.60859e-24	8.87731e-20
H3f3b	-0.397155	0.998	0.971	1.6595e-23	2.22921e-19
Snhg11	-0.402593	0.996	0.978	9.53864e-23	1.28133e-18
Tubb2b	0.632801	0.95	0.969	1.04235e-22	1.40019e-18	Septa
mt-Nd4	0.350056	1	1	1.89915e-22	2.55113e-18
Cplx2	0.517679	0.356	0.639	2.24956e-22	3.02183e-18
Id2	0.624189	0.23	0.481	6.72525e-21	9.03403e-17
Map1b	0.404328	0.957	0.976	8.66896e-21	1.1645e-16	Septa
Igfbp4	0.260247	0.007	0.16	4.98157e-20	6.69174e-16
Ptn	-0.370047	1	0.98	7.91284e-20	1.06293e-15
Tppp3	0.349251	0.107	0.33	5.27133e-19	7.08097e-15	Septa	YES
Dpysl5	0.458557	0.333	0.585	6.42126e-19	8.62567e-15	Septa
Efnb3	0.345167	0.181	0.428	8.17209e-19	1.09776e-14	Septa	YES
Nrsn1	-0.487829	0.799	0.57	1.02557e-18	1.37764e-14
Tenm1	0.38581	0.174	0.415	1.84862e-18	2.48325e-14	Septa	YES
Gda	0.381833	0.237	0.479	4.92559e-18	6.61655e-14
Trim67	0.338436	0.089	0.295	6.35868e-18	8.54162e-14
Gabra5	0.344078	0.117	0.339	8.09241e-18	1.08705e-13
Lrrtm3	0.232931	0.03	0.195	1.15428e-17	1.55054e-13
Gpc6	0.203452	0.007	0.142	1.6057e-17	2.15694e-13
Neto2	0.387511	0.132	0.35	1.74656e-17	2.34615e-13
Fnbp1l	0.449273	0.388	0.621	2.40372e-17	3.22891e-13
Dpysl2	0.550375	0.737	0.876	2.42833e-17	3.26198e-13
Usp2	-0.388253	0.48	0.244	4.05278e-17	5.4441e-13	Hollow	YES
Crmp1	0.483944	0.804	0.909	4.10702e-17	5.51697e-13	Septa
mt-Co3	0.241968	1	1	6.47547e-17	8.6985e-13
Ubb	-0.387288	0.973	0.894	6.69582e-17	8.99449e-13
Serpine2	0.334516	0.162	0.392	7.79356e-17	1.04691e-12
Pgm2l1	0.504646	0.598	0.765	8.87684e-17	1.19243e-12
Rac3	0.383466	0.794	0.922	1.37239e-16	1.84354e-12	Septa
Tuba1b	0.436562	0.649	0.836	1.7108e-16	2.29811e-12
Prkacb	0.419119	0.338	0.559	3.7017e-16	4.97249e-12
Cox4i1	-0.341066	0.998	0.962	4.17289e-16	5.60544e-12
Elmo1	0.209383	0.03	0.184	4.26808e-16	5.73332e-12
Psd3	0.341062	0.242	0.477	4.2977e-16	5.7731e-12
Ptprs	0.368487	0.37	0.603	4.51576e-16	6.06602e-12
Enc1	0.489298	0.351	0.57	8.90636e-16	1.19639e-11	Septa
Dpysl3	0.492624	0.689	0.836	1.10395e-15	1.48294e-11	Septa
Rasd2	-0.277261	0.281	0.082	1.37612e-15	1.84855e-11	Hollow	YES
Pcdh17	0.217907	0.014	0.144	1.63349e-15	2.19427e-11
Bex1	0.386785	0.395	0.614	2.43809e-15	3.27508e-11
Crip2	0.412907	0.676	0.827	3.11108e-15	4.17912e-11
Gpm6a	0.54554	0.865	0.945	3.96576e-15	5.3272e-11	Septa
Runx1t1	0.379125	0.117	0.31	5.32375e-15	7.1514e-11
Chgb	-0.417468	0.738	0.519	8.02311e-15	1.07774e-10
Hs6st2	0.235566	0.032	0.175	9.74e-15	1.30837e-10
Cpne4	0.229509	0.023	0.157	1.06704e-14	1.43336e-10
Usp22	0.368367	0.359	0.592	1.12312e-14	1.50869e-10
Sparcl1	0.31272	0.069	0.239	1.28009e-14	1.71954e-10
Rtn1	-0.240769	0.998	0.993	2.24601e-14	3.01706e-10
RP23-407N2.2	0.306233	0.13	0.324	2.78704e-14	3.74383e-10
Pcdh19	0.296483	0.098	0.279	3.17942e-14	4.27091e-10	Septa	YES
Gnao1	0.358178	0.683	0.847	3.44898e-14	4.63302e-10
Hlf	-0.353473	0.468	0.248	4.46349e-14	5.9958e-10	Hollow	YES
Nrxn2	0.379248	0.628	0.814	4.49303e-14	6.03549e-10	Septa
Lrp1b	0.247176	0.046	0.195	5.90209e-14	7.92828e-10
Cxadr	0.400459	0.486	0.703	7.70824e-14	1.03545e-09
Scd2	0.39465	0.294	0.501	8.03301e-14	1.07907e-09
Arf3	0.363985	0.377	0.599	8.82417e-14	1.18535e-09
Dtx4	0.24117	0.071	0.235	9.97264e-14	1.33962e-09
Hbegf	-0.333014	0.422	0.204	1.17178e-13	1.57406e-09
Gprasp1	0.336166	0.201	0.401	1.53278e-13	2.05899e-09
Arnt2	0.213898	0.052	0.202	1.63956e-13	2.20243e-09
Gabbr1	0.347952	0.425	0.639	1.71948e-13	2.30978e-09
Ccl27a	0.35146	0.477	0.698	1.81478e-13	2.4378e-09
mt-Nd2	0.327808	0.835	0.929	2.1271e-13	2.85734e-09
Ywhag	0.538123	0.667	0.805	2.29251e-13	3.07952e-09
Mt3	0.274658	0.069	0.231	2.4824e-13	3.33461e-09
mt-Cytb	0.215984	1	1	2.76487e-13	3.71405e-09
Edil3	0.263274	0.06	0.213	2.8268e-13	3.79725e-09
Snca	-0.30062	0.988	0.929	3.29529e-13	4.42657e-09
Vldlr	0.327844	0.201	0.397	3.3713e-13	4.52866e-09
Rph3a	0.16176	0.009	0.113	5.36151e-13	7.20211e-09
Rps14	-0.268838	1	0.996	5.91826e-13	7.94999e-09
Cul3	0.256413	0.169	0.37	7.43594e-13	9.9887e-09
Idh1	0.279445	0.139	0.324	7.69572e-13	1.03377e-08
Rgs6	0.268306	0.144	0.333	8.2092e-13	1.10274e-08
Sdc3	0.362378	0.249	0.446	8.473e-13	1.13818e-08
Ndn	0.408836	0.377	0.572	9.08733e-13	1.2207e-08
Mapre2	0.31918	0.363	0.572	1.09956e-12	1.47704e-08
Atp6v1g1	-0.344194	0.888	0.794	1.12463e-12	1.51072e-08
Ncam1	0.341663	0.852	0.898	1.29551e-12	1.74026e-08
Ppia	-0.227575	0.998	0.998	1.39804e-12	1.87799e-08
Pde4b	0.182172	0.034	0.162	1.65837e-12	2.22769e-08
Atp9a	0.350995	0.286	0.486	1.71065e-12	2.29792e-08
Map6	0.306842	0.187	0.379	1.76184e-12	2.36667e-08
Sec23a	0.269539	0.125	0.302	2.32606e-12	3.1246e-08
Map4	0.310532	0.368	0.574	2.32678e-12	3.12557e-08
Unc13a	0.281025	0.173	0.364	2.36975e-12	3.18328e-08
Ndrg4	0.386345	0.536	0.732	2.461e-12	3.30586e-08
Pcdh10	0.283864	0.146	0.326	2.66078e-12	3.57422e-08
Canx	0.353925	0.375	0.565	2.68565e-12	3.60763e-08
Inpp5f	0.245067	0.146	0.33	2.96448e-12	3.98218e-08
Slitrk5	0.29093	0.157	0.337	3.05517e-12	4.104e-08
Ap2a1	0.27755	0.151	0.333	4.61478e-12	6.19903e-08
Plxnd1	-0.279492	0.399	0.195	4.96e-12	6.66277e-08	Hollow	YES
Dusp6	0.219761	0.075	0.226	6.65541e-12	8.94021e-08
Malat1	-0.294307	1	0.998	7.22758e-12	9.70881e-08
1700086L19Rik	0.245118	0.123	0.293	7.22917e-12	9.71094e-08
Enpp2	0.132438	0.005	0.095	8.10273e-12	1.08844e-07
Caln1	-0.356329	0.731	0.588	9.13858e-12	1.22759e-07
Samd8	0.264201	0.206	0.397	9.34583e-12	1.25542e-07
Ackr1	0.294156	0.19	0.377	1.0302e-11	1.38386e-07
Mapt	0.310903	0.867	0.945	1.15967e-11	1.55778e-07
Ccdc184	0.267455	0.139	0.31	1.16209e-11	1.56104e-07
Gatm	0.214263	0.1	0.262	1.16505e-11	1.56501e-07
Calm2	-0.1805	1	1	1.18739e-11	1.59502e-07
Cpne5	0.197468	0.048	0.18	1.20172e-11	1.61427e-07
Gnb4	0.260944	0.185	0.373	1.24823e-11	1.67675e-07
Ndufa5	-0.370233	0.851	0.723	1.30461e-11	1.75248e-07
Hccs	-0.438464	0.512	0.322	1.3734e-11	1.84488e-07
Ppp3cb	0.320212	0.52	0.723	1.44818e-11	1.94534e-07
Ptprn	0.231805	0.121	0.29	1.70718e-11	2.29326e-07
Cdk5r2	0.34764	0.379	0.563	1.86391e-11	2.50379e-07
Bsn	0.226194	0.098	0.255	1.96036e-11	2.63335e-07
Rbm39	-0.340579	0.902	0.807	2.49386e-11	3.35e-07
Abi2	0.293933	0.44	0.656	2.70463e-11	3.63313e-07
Agap3	0.251284	0.135	0.304	3.55473e-11	4.77507e-07
Basp1	0.33747	0.872	0.922	4.07586e-11	5.47511e-07
Syp	0.356277	0.361	0.548	4.10387e-11	5.51273e-07
Dbp	-0.254223	0.374	0.186	4.45779e-11	5.98815e-07	Hollow	YES
Eps15	0.250004	0.121	0.282	4.64855e-11	6.2444e-07
Cryab	-0.345522	0.548	0.353	4.68405e-11	6.29208e-07
Dner	0.372766	0.311	0.494	5.88287e-11	7.90246e-07
Fasn	0.27136	0.162	0.333	6.1624e-11	8.27795e-07
Psd	0.281868	0.262	0.45	6.25998e-11	8.40903e-07
Purb	0.309333	0.441	0.619	6.26494e-11	8.4157e-07
Itfg1	0.309879	0.31	0.488	6.4327e-11	8.64105e-07
Lcorl	0.217743	0.107	0.264	6.6311e-11	8.90756e-07
Stmn1	-0.179448	1	1	7.05836e-11	9.4815e-07
Cdh8	0.240574	0.117	0.275	7.33886e-11	9.85829e-07	Septa	YES
Tspan7	0.332297	0.311	0.497	8.25511e-11	1.10891e-06
Gnas	0.37759	0.609	0.741	8.58111e-11	1.1527e-06
Gnai1	0.266217	0.198	0.375	9.06773e-11	1.21807e-06
Cntn1	0.397685	0.593	0.712	9.20764e-11	1.23686e-06
Ptpro	0.239834	0.08	0.222	9.24104e-11	1.24135e-06
Ids	0.321412	0.253	0.43	9.37356e-11	1.25915e-06
Zbed3	-0.269368	0.32	0.151	9.4592e-11	1.27065e-06	Hollow	YES
Wsb2	0.324803	0.31	0.492	1.12234e-10	1.50764e-06
Irgq	0.220039	0.103	0.257	1.13623e-10	1.52629e-06
Klhl2	0.233785	0.123	0.282	1.15086e-10	1.54595e-06
Ptbp2	0.282776	0.233	0.415	1.20218e-10	1.61489e-06
Cntn4	0.121522	0.009	0.095	1.24295e-10	1.66965e-06
Actr3	0.259615	0.324	0.519	1.48823e-10	1.99913e-06
Uba1	0.29896	0.222	0.397	1.57564e-10	2.11656e-06
Ipo5	0.227541	0.107	0.259	1.58231e-10	2.12552e-06
Banp	-0.365159	0.68	0.534	1.58602e-10	2.1305e-06
Cspg5	0.333863	0.464	0.641	1.63095e-10	2.19085e-06
Sema7a	-0.28295	0.55	0.357	1.91954e-10	2.57852e-06	Hollow	YES
Alcam	0.277971	0.215	0.392	2.0656e-10	2.77472e-06
Nrxn1	-0.235643	0.982	0.967	2.09762e-10	2.81773e-06
Rpl18a	-0.239926	0.998	0.98	2.10054e-10	2.82166e-06
Cnr1	0.198312	0.053	0.177	2.10386e-10	2.82611e-06
Rtn4	0.330154	0.518	0.692	2.13383e-10	2.86637e-06
Ywhaz	0.263104	0.906	0.962	2.15971e-10	2.90114e-06
Klc1	0.347163	0.612	0.758	2.21003e-10	2.96874e-06
Mtch1	0.245674	0.189	0.361	2.24777e-10	3.01943e-06
Rnf112	0.189286	0.066	0.197	2.27158e-10	3.05141e-06
Brinp3	0.118605	0.009	0.093	2.41909e-10	3.24957e-06
B3gat1	0.226455	0.048	0.166	2.54055e-10	3.41271e-06
Kif5a	0.256403	0.372	0.576	2.86547e-10	3.84919e-06
Hnrnpa0	0.276801	0.192	0.361	2.91701e-10	3.91842e-06
Atp6ap1	0.283694	0.21	0.375	3.13928e-10	4.217e-06
Atxn7l3b	-0.296101	0.936	0.86	3.19456e-10	4.29125e-06
Cox6a2	-0.324933	0.45	0.268	3.41042e-10	4.58122e-06
Smarca2	0.283272	0.272	0.455	3.53688e-10	4.7511e-06
Pcdh8	0.126259	0.004	0.078	4.27443e-10	5.74184e-06
Hmgcr	0.274756	0.192	0.361	4.35563e-10	5.85092e-06
Hnrnpu	0.264784	0.375	0.559	4.50513e-10	6.05174e-06
Zfp704	0.21344	0.135	0.295	4.55289e-10	6.1159e-06
Stxbp1	0.302428	0.639	0.778	4.62761e-10	6.21627e-06
Hist1h2bc	0.226087	0.071	0.2	4.91268e-10	6.59921e-06
Sepw1	0.215786	1	1	5.08445e-10	6.82994e-06
Epn2	0.140349	0.03	0.135	5.08761e-10	6.83419e-06
Trim8	0.215905	0.094	0.235	5.11906e-10	6.87643e-06
Arl8a	0.277725	0.388	0.574	5.72756e-10	7.69382e-06
Tmsb4x	0.211714	1	1	6.22616e-10	8.3636e-06
Elavl2	0.308117	0.299	0.477	6.35417e-10	8.53556e-06
Kif1b	0.305536	0.601	0.745	6.62107e-10	8.89408e-06
Tmeff1	0.249698	0.149	0.306	6.68708e-10	8.98276e-06
Git1	0.19149	0.094	0.237	6.91938e-10	9.2948e-06
March6	0.269614	0.249	0.426	7.62468e-10	1.02422e-05
Azin1	0.261661	0.315	0.497	7.68269e-10	1.03202e-05
Timp2	0.276858	0.242	0.412	7.74464e-10	1.04034e-05
Sh3glb1	0.243051	0.311	0.499	8.21338e-10	1.1033e-05
Pde1a	0.229432	0.144	0.304	8.34492e-10	1.12097e-05
Fam84b	0.108629	0.004	0.075	8.49113e-10	1.14061e-05
Ddb1	0.202941	0.091	0.228	9.17644e-10	1.23267e-05
Rtn3	0.317443	0.722	0.836	9.39928e-10	1.26261e-05
Pak3	0.270423	0.374	0.557	1.0657e-09	1.43155e-05
Kif21b	0.324192	0.383	0.559	1.1851e-09	1.59194e-05
Cd200	0.267198	0.568	0.752	1.2185e-09	1.63681e-05
Dnmt3a	0.233878	0.194	0.361	1.32536e-09	1.78036e-05
Stx1b	0.232554	0.165	0.326	1.35085e-09	1.8146e-05
Arl6ip1	0.277914	0.379	0.563	1.45711e-09	1.95734e-05
Ache	0.171124	0.05	0.164	1.57251e-09	2.11236e-05
5031439G07Rik	0.187205	0.093	0.228	1.6838e-09	2.26185e-05
Msmo1	0.210351	0.11	0.253	1.71995e-09	2.31041e-05
Pja2	0.300732	0.56	0.716	1.77442e-09	2.38358e-05
Fscn1	0.302696	0.42	0.592	1.85095e-09	2.48638e-05
Tgfbr1	-0.263404	0.415	0.239	2.07842e-09	2.79194e-05	Hollow	YES
Cpe	0.339617	0.527	0.683	2.16392e-09	2.9068e-05
Tmem127	0.233818	0.153	0.306	2.37854e-09	3.19509e-05
Rgma	0.138378	0.02	0.109	2.38316e-09	3.2013e-05
Cltc	0.296142	0.418	0.583	2.45525e-09	3.29814e-05
Slc25a22	0.225348	0.16	0.315	2.59787e-09	3.48971e-05
Cdk5r1	0.331189	0.607	0.743	2.85527e-09	3.83548e-05
Car10	0.195932	0.089	0.222	2.96485e-09	3.98268e-05
Atp2a2	0.283495	0.496	0.665	3.03214e-09	4.07308e-05
Rps27a	-0.236685	1	0.947	3.06993e-09	4.12384e-05
Prmt2	0.214986	0.173	0.33	3.26026e-09	4.37951e-05
Ppp2ca	0.309127	0.404	0.57	3.30003e-09	4.43293e-05
Gpi1	0.239087	0.187	0.344	3.32137e-09	4.46159e-05
Fam124a	0.219088	0.21	0.377	3.37498e-09	4.53361e-05
Klhl23	0.258227	0.263	0.43	3.37597e-09	4.53494e-05
Dbpht2	0.214516	0.13	0.275	3.41253e-09	4.58405e-05
Rhou	0.202831	0.198	0.366	3.69777e-09	4.96722e-05
Synj1	0.22522	0.292	0.468	3.82474e-09	5.13777e-05
Spin1	0.259495	0.29	0.461	3.84425e-09	5.16398e-05
Snap91	0.296906	0.607	0.741	3.99807e-09	5.3706e-05
Sybu	0.263967	0.256	0.424	4.17124e-09	5.60323e-05
Barx2	-0.226058	0.361	0.191	4.2331e-09	5.68633e-05	Hollow	YES
Acot7	0.293164	0.32	0.477	4.28838e-09	5.76057e-05
Zdhhc8	0.166519	0.053	0.166	4.2937e-09	5.76773e-05
Gm12371	0.213675	0.117	0.257	4.58548e-09	6.15968e-05
Nefl	0.206884	0.071	0.193	4.60266e-09	6.18275e-05
Tomm70a	0.254249	0.308	0.475	4.62786e-09	6.21661e-05
Sirpa	0.173053	0.071	0.195	4.63832e-09	6.23065e-05
Csnk1g3	0.206225	0.1	0.233	4.66382e-09	6.26491e-05
Eml2	0.18087	0.094	0.228	4.84739e-09	6.5115e-05
Fstl5	0.127304	0.023	0.113	4.86872e-09	6.54015e-05
Slc4a3	0.193288	0.158	0.315	5.48783e-09	7.3718e-05
Mpped1	0.293511	0.391	0.561	5.49213e-09	7.37758e-05
Adrbk2	0.149376	0.036	0.135	5.50109e-09	7.38961e-05
mt-Nd4l	0.235342	0.212	0.377	5.72784e-09	7.69421e-05
Arxes1	0.258116	0.212	0.368	5.89234e-09	7.91519e-05
Gng4	0.212769	0.13	0.273	6.15883e-09	8.27316e-05
Tmem108	0.240299	0.157	0.302	6.18441e-09	8.30752e-05
Cnksr2	0.231982	0.297	0.466	6.51383e-09	8.75003e-05
Sept7	0.259113	0.48	0.659	7.24759e-09	9.73569e-05
Dusp14	-0.213291	0.258	0.115	7.33174e-09	9.84873e-05
Atp6v1b2	0.264215	0.292	0.457	8.06625e-09	0.000108354
Lin7c	0.264606	0.24	0.401	8.22909e-09	0.000110541
Lsm11	0.298357	0.365	0.525	8.23105e-09	0.000110568
Dync1h1	0.289506	0.265	0.419	8.3509e-09	0.000112178
Arhgap33	0.201791	0.196	0.357	8.4861e-09	0.000113994
Nptn	0.293888	0.486	0.647	8.64511e-09	0.00011613
Hrh3	-0.199794	0.208	0.08	8.68864e-09	0.000116715	Hollow	YES
Reep1	0.242939	0.281	0.452	8.70311e-09	0.000116909
Cep170b	0.196746	0.105	0.237	9.20705e-09	0.000123678
Lonrf2	0.233464	0.169	0.317	9.4036e-09	0.000126319
Srcin1	0.230809	0.142	0.286	9.56347e-09	0.000128466
Cetn3	-0.31393	0.774	0.665	9.88126e-09	0.000132735
Tusc3	0.265842	0.276	0.428	1.04016e-08	0.000139725
Dirc2	0.182513	0.093	0.22	1.22207e-08	0.000164161
Kif2a	0.221227	0.228	0.39	1.23777e-08	0.00016627
Vat1l	0.106876	0.009	0.08	1.23893e-08	0.000166425
Mib1	0.232618	0.187	0.337	1.2514e-08	0.0001681
Atp2b4	0.17186	0.02	0.102	1.27954e-08	0.000171881
Oaz1	-0.236624	0.989	0.931	1.33984e-08	0.00017998
Scn3b	0.19316	0.116	0.251	1.43775e-08	0.000193133
Camk2n2	0.234494	0.214	0.37	1.44939e-08	0.000194697
Mboat7	0.167318	0.055	0.164	1.45611e-08	0.000195599
Lrrtm4	0.172671	0.057	0.166	1.51464e-08	0.000203462
C77370	0.226704	0.203	0.357	1.53455e-08	0.000206136
Gm15800	0.211021	0.174	0.326	1.53525e-08	0.00020623
Ap2b1	0.257488	0.265	0.421	1.53609e-08	0.000206343
Csnk2a1	0.20911	0.228	0.388	1.56442e-08	0.000210148
Ahi1	0.212685	0.31	0.479	1.56671e-08	0.000210456
Pdzrn4	0.0838832	0	0.055	1.62005e-08	0.000217621
Gng2	0.265401	0.633	0.758	1.66782e-08	0.000224039
Maged1	0.331997	0.326	0.47	1.70393e-08	0.000228889
Tmem191c	-0.241007	0.895	0.792	1.74259e-08	0.000234082
Cpne8	0.195046	0.098	0.226	1.86514e-08	0.000250545
Neurod2	-0.296089	0.724	0.623	1.93636e-08	0.000260111
Spock1	0.31011	0.319	0.475	1.99155e-08	0.000267525	Septa
Armcx3	0.228044	0.205	0.361	2.03061e-08	0.000272772
Slc35f1	0.217186	0.228	0.39	2.04713e-08	0.000274991
Dlgap1	0.232496	0.279	0.443	2.06192e-08	0.000276978
Spata2l	0.145986	0.048	0.151	2.22747e-08	0.000299216
Fam168b	0.228044	0.217	0.37	2.24614e-08	0.000301723
Nrbp2	0.221532	0.148	0.288	2.26569e-08	0.00030435
1810037I17Rik	0.245425	0.375	0.548	2.28747e-08	0.000307276
Rpl3	-0.234878	0.998	0.956	2.32892e-08	0.000312843
Nov	0.103928	0.009	0.078	2.3767e-08	0.000319262
Usp14	0.20215	0.141	0.282	2.39792e-08	0.000322112
Trim28	0.173772	0.109	0.242	2.40934e-08	0.000323646
Tmtc4	0.186523	0.112	0.244	2.55381e-08	0.000343053
Rps9	-0.230045	0.964	0.911	2.55719e-08	0.000343507
Dcaf7	0.2288	0.194	0.341	2.66762e-08	0.000358342
Prex1	0.151193	0.044	0.144	2.71375e-08	0.000364538
Eif4a2	-0.24177	0.954	0.907	2.89249e-08	0.000388548
Sv2a	0.249213	0.333	0.49	2.91845e-08	0.000392035
Itpr1	0.123017	0.03	0.12	2.93307e-08	0.000394
Ss18l1	0.149347	0.052	0.155	2.93578e-08	0.000394363
Taok1	0.20502	0.265	0.428	2.97994e-08	0.000400295
Ptma	-0.228026	0.984	0.938	3.00979e-08	0.000404305
Kras	0.203926	0.164	0.313	3.02075e-08	0.000405777
Whsc1	0.221156	0.214	0.364	3.04595e-08	0.000409163
Osbpl1a	-0.270888	0.897	0.84	3.15599e-08	0.000423944
Neo1	0.262436	0.208	0.353	3.18193e-08	0.000427428
Acly	0.194432	0.101	0.226	3.30238e-08	0.000443609
Pclo	0.218326	0.26	0.421	3.37751e-08	0.0004537
Mapk1	0.254271	0.475	0.627	3.39222e-08	0.000455677
Map2	0.252108	0.454	0.61	3.43515e-08	0.000461444
Pou3f3	0.265256	0.286	0.443	3.43825e-08	0.00046186
Tnpo3	0.196176	0.133	0.271	3.56269e-08	0.000478577
Hras	0.212887	0.162	0.302	3.79786e-08	0.000510166
Sptbn2	0.232028	0.274	0.437	3.87058e-08	0.000519935
Pnmal2	0.191081	0.121	0.253	3.92048e-08	0.000526638
Cdc42bpa	0.215615	0.18	0.326	3.92155e-08	0.000526782
Ahcyl1	0.209712	0.198	0.346	4.12476e-08	0.000554079
Ddah1	0.0984329	0.011	0.08	4.12862e-08	0.000554598
Ptp4a1	0.236188	0.431	0.605	4.16234e-08	0.000559128
Zswim6	0.16146	0.069	0.182	4.22138e-08	0.000567058
Necab1	0.266473	0.283	0.432	4.2579e-08	0.000571964
Nrip3	0.201429	0.171	0.317	4.28062e-08	0.000575015
Ndufa4	-0.210615	0.989	0.962	4.36945e-08	0.000586948
Lrp8	0.182646	0.117	0.251	4.38263e-08	0.000588719
Klhl9	0.198733	0.121	0.251	4.49058e-08	0.000603219
Pde4dip	0.188019	0.128	0.262	4.49747e-08	0.000604146
Phf24	0.204478	0.222	0.379	4.66127e-08	0.000626148
Nr1d1	-0.212876	0.379	0.22	4.72471e-08	0.000634671	Hollow	YES
Vgf	0.0937707	0.004	0.062	4.76447e-08	0.000640012
Tubb3	0.371319	0.808	0.876	4.76698e-08	0.000640348	Septa
Btbd1	0.190331	0.158	0.302	4.9519e-08	0.000665189
Nudt4	0.258622	0.356	0.514	4.97792e-08	0.000668683
Gria3	0.155979	0.059	0.164	4.99727e-08	0.000671284
Rap2a	0.157389	0.094	0.217	5.03643e-08	0.000676544
Sorl1	0.130019	0.043	0.14	5.33576e-08	0.000716753	Septa
Hip1	0.112921	0.023	0.104	5.52388e-08	0.000742023
Ppp2r1a	0.277365	0.422	0.559	5.82743e-08	0.000782799
Mfsd6	0.159628	0.078	0.193	5.90694e-08	0.000793479
Serinc1	0.301636	0.626	0.743	5.97228e-08	0.000802256
Myo5a	0.216655	0.251	0.408	5.97407e-08	0.000802497
Fam81a	0.197341	0.149	0.286	6.05373e-08	0.000813198
Igfbp5	0.278004	0.262	0.421	6.10747e-08	0.000820417
Caprin1	0.233412	0.404	0.563	6.24602e-08	0.000839028
Minar1	-0.24089	0.381	0.231	6.52672e-08	0.000876734	Hollow	YES
Rab6b	0.246165	0.479	0.639	6.59525e-08	0.000885941
Xpo1	0.173878	0.128	0.262	6.60329e-08	0.00088702
Plxna1	0.232315	0.254	0.408	6.61847e-08	0.00088906
Lingo2	0.199034	0.208	0.361	6.72853e-08	0.000903844
Sv2b	0.221153	0.169	0.308	6.72966e-08	0.000903995
Trim2	0.259943	0.377	0.519	6.94984e-08	0.000933572
Grm4	-0.15928	0.16	0.053	7.26201e-08	0.000975506	Hollow	YES
Elovl4	0.231591	0.258	0.408	7.3054e-08	0.000981335
Sez6l	0.182918	0.109	0.233	7.39251e-08	0.000993036
Dok5	0.200776	0.212	0.364	8.18033e-08	0.00109886
Cacng4	0.175913	0.082	0.195	8.39518e-08	0.00112772
Atp1a1	0.265504	0.23	0.373	8.52982e-08	0.00114581
mt-Nd5	0.227293	0.482	0.65	8.61703e-08	0.00115753
Rgs13	-0.255791	0.201	0.084	8.83434e-08	0.00118672
Cadm3	0.291972	0.333	0.481	8.95243e-08	0.00120258
Sulf2	0.16901	0.037	0.126	9.02541e-08	0.00121238
Rpl18	-0.231808	0.952	0.907	9.12002e-08	0.00122509
Me1	0.12515	0.039	0.131	9.32591e-08	0.00125275
Sptbn1	0.245233	0.665	0.787	9.43387e-08	0.00126725
Psmd2	0.191912	0.109	0.231	9.50074e-08	0.00127623
Camk2b	0.295257	0.593	0.736	9.90157e-08	0.00133008
Gpr158	-0.232513	0.407	0.255	1.02104e-07	0.00137156	Hollow	YES
Map3k10	0.156288	0.093	0.211	1.03953e-07	0.00139641
Ube2r2	0.19152	0.164	0.304	1.04141e-07	0.00139892
Ppp2r2c	0.241327	0.468	0.614	1.05381e-07	0.00141558
Ptov1	0.194099	0.155	0.293	1.07472e-07	0.00144367
Dgcr2	0.177171	0.107	0.228	1.07893e-07	0.00144933
Akap6	0.176862	0.142	0.279	1.08811e-07	0.00146165
Ythdf3	0.14025	0.06	0.164	1.09284e-07	0.00146801
Chst1	0.217467	0.215	0.361	1.10978e-07	0.00149076
Agtpbp1	0.222686	0.345	0.508	1.1515e-07	0.00154681
Ctnnb1	0.19918	0.141	0.273	1.15803e-07	0.00155559
Tmem132b	0.132796	0.046	0.142	1.16409e-07	0.00156372
Gpr27	0.17502	0.089	0.204	1.17326e-07	0.00157604
Lhfpl4	0.191313	0.151	0.288	1.1817e-07	0.00158737
Cyp51	0.172301	0.077	0.186	1.19964e-07	0.00161147
Fgf13	0.239602	0.491	0.647	1.21192e-07	0.00162797
1190002N15Rik	0.0717596	0	0.049	1.21915e-07	0.00163769
Trio	0.211574	0.125	0.248	1.22279e-07	0.00164258
Wdr7	0.187729	0.11	0.233	1.29899e-07	0.00174493
Arl4c	0.152812	0.078	0.191	1.30174e-07	0.00174863
Ugcg	0.198436	0.189	0.33	1.31812e-07	0.00177063
S100a10	0.308583	0.422	0.565	1.33067e-07	0.00178749
Arxes2	0.211806	0.206	0.35	1.34499e-07	0.00180672
Akirin2	0.173053	0.082	0.193	1.34791e-07	0.00181065
Tubb4a	0.216704	0.297	0.452	1.36241e-07	0.00183012
Aplp2	0.254081	0.306	0.446	1.37521e-07	0.00184731
Ak5	0.156266	0.06	0.162	1.38836e-07	0.00186499
Mblac2	0.185123	0.132	0.259	1.4105e-07	0.00189472
Camk2d	0.119354	0.011	0.075	1.46029e-07	0.00196161
Aig1	0.179713	0.13	0.257	1.51087e-07	0.00202955
Synpr	0.15816	0.02	0.093	1.52015e-07	0.00204202
Syt7	0.201965	0.144	0.273	1.56012e-07	0.00209571
Ptprd	-0.238951	0.932	0.898	1.58142e-07	0.00212432
Dbn1	0.230553	0.317	0.47	1.60705e-07	0.00215875
Tm9sf3	0.187501	0.183	0.328	1.64678e-07	0.00221212
Chl1	0.274511	0.475	0.621	1.68162e-07	0.00225891	Septa
Ctnnbip1	0.201134	0.242	0.392	1.70946e-07	0.00229632
Chst2	0.167547	0.071	0.177	1.71123e-07	0.00229869
Gria1	0.188087	0.1	0.215	1.72106e-07	0.00231191
Smim10l2a	0.153574	0.096	0.215	1.74605e-07	0.00234546
Pde8b	-0.182464	0.276	0.14	1.76072e-07	0.00236518	Hollow	YES
Cdc27	0.133913	0.041	0.131	1.76711e-07	0.00237376
Trp53inp2	0.185672	0.151	0.284	1.777e-07	0.00238705
Slain1	0.152972	0.057	0.155	1.78673e-07	0.00240011
Tmem181a	0.190359	0.178	0.319	1.81616e-07	0.00243964
Kcnv1	0.138977	0.055	0.153	1.88613e-07	0.00253364
Dst	0.219211	0.324	0.475	1.94832e-07	0.00261718
Zfand5	0.209269	0.224	0.368	2.02555e-07	0.00272093
Rnf187	0.268533	0.331	0.466	2.06169e-07	0.00276947
Tollip	0.151375	0.071	0.177	2.08529e-07	0.00280117
Prkce	0.218933	0.327	0.483	2.15416e-07	0.00289368
Btbd3	-0.148532	0.169	0.062	2.17371e-07	0.00291995	Hollow	YES
Anks1b	0.227489	0.288	0.432	2.28825e-07	0.00307381
Rnf11	0.232371	0.246	0.386	2.32073e-07	0.00311744
Luzp2	0.110414	0.025	0.102	2.34468e-07	0.0031496
Cpeb2	0.155285	0.069	0.173	2.40158e-07	0.00322604
Slc22a17	0.221346	0.375	0.534	2.60912e-07	0.00350483
Arhgdig	0.224672	0.817	0.909	2.62515e-07	0.00352637
Tlk1	0.188091	0.142	0.271	2.62711e-07	0.00352899
Atp5o	-0.25857	0.799	0.736	2.6964e-07	0.00362208
Hexdc	0.15489	0.082	0.191	2.80223e-07	0.00376424
Prpf19	0.184454	0.169	0.304	2.81782e-07	0.00378518
Mapk8ip2	0.193482	0.165	0.299	2.85333e-07	0.00383288
Igf1r	0.193454	0.185	0.322	3.00729e-07	0.0040397
Sqle	0.201263	0.196	0.333	3.10018e-07	0.00416447
Rps8	-0.194219	0.991	0.962	3.11886e-07	0.00418956
Gjd2	0.0861172	0.009	0.069	3.19741e-07	0.00429508
Nav1	0.251135	0.765	0.834	3.20537e-07	0.00430578
Nnmt	0.108301	0.027	0.104	3.256e-07	0.00437378
Syncrip	0.192624	0.269	0.419	3.30996e-07	0.00444626
Hsph1	0.231028	0.294	0.441	3.36355e-07	0.00451825
Rps16	-0.203174	0.998	0.976	3.39025e-07	0.00455412
Ttyh3	0.238283	0.21	0.344	3.49515e-07	0.00469503
Neurod6	0.317443	0.212	0.339	3.56818e-07	0.00479314
Agfg1	0.163666	0.11	0.231	3.57594e-07	0.00480356
Atxn7l3	0.179939	0.107	0.222	3.60112e-07	0.00483739
L1cam	0.262521	0.472	0.612	3.6327e-07	0.00487981
Fam171b	0.234365	0.475	0.627	3.69772e-07	0.00496715
Psap	0.401263	0.518	0.621	3.79884e-07	0.00510298
Slc17a7	0.241092	0.299	0.448	3.79983e-07	0.00510432
Atp6v1a	0.239359	0.482	0.65	3.90562e-07	0.00524642
Rilpl2	0.148978	0.087	0.197	3.99304e-07	0.00536385
Dync1i1	0.196853	0.126	0.246	4.02984e-07	0.00541328
Lrrn2	0.195322	0.151	0.277	4.24983e-07	0.0057088
Nyap1	0.185035	0.149	0.275	4.29827e-07	0.00577387
Myh10	0.185799	0.198	0.337	4.33275e-07	0.00582019
Jak1	0.193072	0.189	0.324	4.34476e-07	0.00583632
Tmed7	0.165196	0.155	0.286	4.52653e-07	0.00608048
Fam8a1	0.150793	0.071	0.173	4.56777e-07	0.00613589
Cd47	0.279846	0.452	0.594	4.5715e-07	0.00614089
Mgat4b	0.169531	0.107	0.222	4.59393e-07	0.00617103
Klf6	0.220581	0.302	0.45	4.61176e-07	0.00619498
Sema3a	0.114438	0.03	0.109	4.7913e-07	0.00643615
Cdh13	0.136222	0.053	0.146	4.79428e-07	0.00644015
Prkaca	0.173772	0.116	0.233	4.87219e-07	0.00654482
Nlgn3	0.222194	0.246	0.381	5.17303e-07	0.00694893
Slc30a3	0.209217	0.173	0.304	5.24808e-07	0.00704974
Slc8a2	0.148114	0.073	0.175	5.28068e-07	0.00709354
Nrcam	0.224761	0.185	0.315	5.35209e-07	0.00718946
Mfn2	0.173302	0.084	0.188	5.48365e-07	0.00736618
Rangap1	0.214349	0.208	0.341	5.55314e-07	0.00745953
Atp13a2	0.197422	0.206	0.344	5.62361e-07	0.00755419
Kcnk2	-0.259252	0.523	0.368	5.65461e-07	0.00759584
Wwc1	0.159722	0.094	0.204	5.70502e-07	0.00766356
Gnai2	0.176637	0.155	0.282	5.96206e-07	0.00800884
B4galt6	0.234465	0.361	0.501	6.19044e-07	0.00831561
Gls	0.207766	0.24	0.381	6.19859e-07	0.00832657
Slc1a4	0.109077	0.032	0.111	6.19935e-07	0.00832759
Plppr5	0.129219	0.071	0.173	6.22722e-07	0.00836502
Usp9x	0.238112	0.313	0.452	6.22833e-07	0.00836651
Pip4k2b	0.161389	0.116	0.233	6.30196e-07	0.00846543
Ptk2	0.143657	0.077	0.18	6.34442e-07	0.00852246
Epm2aip1	0.157662	0.1	0.211	6.42801e-07	0.00863475
Gabrb3	0.20984	0.343	0.492	6.45135e-07	0.00866609
Actg1	0.26859	0.991	0.991	6.46303e-07	0.00868178
Pde2a	0.201052	0.153	0.277	6.52239e-07	0.00876153
St6galnac5	0.0916477	0.007	0.062	6.56831e-07	0.00882321
Cdkn2d	0.183563	0.358	0.521	6.75505e-07	0.00907406
Syn2	0.20879	0.221	0.355	6.76599e-07	0.00908875	Septa
Doc2b	0.0787582	0.004	0.053	6.82389e-07	0.00916653
Eif2s3x	0.175348	0.16	0.288	6.90694e-07	0.00927809
Arhgef7	0.195452	0.21	0.348	6.94511e-07	0.00932937
Thrb	0.107371	0.032	0.111	7.20717e-07	0.00968139
Bmpr2	0.179175	0.272	0.421	7.22175e-07	0.00970098
Cox7a2l	-0.231556	0.929	0.84	7.22477e-07	0.00970503
Dpp10	0.204573	0.201	0.335	7.28413e-07	0.00978478
Lsm14b	0.187956	0.162	0.288	7.32261e-07	0.00983646
Ube2m	0.152735	0.098	0.208	7.38668e-07	0.00992252
Islr2	0.110799	0.025	0.098	7.42992e-07	0.00998061
Wdr13	0.197964	0.212	0.344	7.45201e-07	0.0100103
Aatk	0.155613	0.1	0.211	7.62908e-07	0.0102481
1700001L19Rik	0.150373	0.109	0.224	7.65872e-07	0.010288
C130071C03Rik	0.187921	0.276	0.424	7.68196e-07	0.0103192
Phc2	0.10043	0.028	0.104	7.90419e-07	0.0106177
Idi1	0.130694	0.053	0.144	8.14504e-07	0.0109412
Rims3	0.111567	0.03	0.106	8.33503e-07	0.0111964
Myo9a	0.167866	0.16	0.288	8.65222e-07	0.0116225
Per1	0.115561	0.036	0.115	8.72266e-07	0.0117172
Lhx2	0.20911	0.224	0.361	9.00121e-07	0.0120913
Frmd3	0.153133	0.126	0.246	9.00719e-07	0.0120994
Srgap2	0.177755	0.162	0.288	9.02288e-07	0.0121204
Rab3b	0.197148	0.187	0.315	9.05564e-07	0.0121644
Syngr1	0.198969	0.244	0.386	9.07968e-07	0.0121967
Cmip	0.220334	0.42	0.557	9.23065e-07	0.0123995
Mmp17	0.107911	0.027	0.1	9.27694e-07	0.0124617
Wdr6	0.18577	0.132	0.248	9.29882e-07	0.0124911
Eif1	-0.170264	0.998	0.978	9.31804e-07	0.0125169
Ergic1	0.177435	0.208	0.346	9.36068e-07	0.0125742
Dact3	0.12968	0.05	0.137	9.58827e-07	0.0128799
Ctnnd2	0.224196	0.221	0.35	9.76231e-07	0.0131137
Plb1	-0.201606	0.235	0.118	9.82286e-07	0.013195
Lin7b	0.21496	0.409	0.559	9.88918e-07	0.0132841
Large	0.196853	0.126	0.239	9.91292e-07	0.013316
Slc6a11	0.13942	0.066	0.162	1.00297e-06	0.0134728
Arhgef28	0.101309	0.023	0.093	1.00681e-06	0.0135245
Dmwd	0.163945	0.135	0.255	1.03761e-06	0.0139383
Slc6a17	0.201429	0.18	0.306	1.04834e-06	0.0140824
Npepps	0.196172	0.233	0.368	1.07152e-06	0.0143937
Rac1	0.206564	0.295	0.435	1.07302e-06	0.0144139
Purg	0.166377	0.187	0.322	1.09498e-06	0.0147088
Pcbd1	0.103715	0.032	0.109	1.13994e-06	0.0153128
Ankrd12	-0.240286	0.833	0.723	1.14492e-06	0.0153797
Casd1	0.175107	0.116	0.226	1.18067e-06	0.01586
Ryr2	0.205583	0.214	0.344	1.20575e-06	0.0161969
Foxg1	0.209383	0.299	0.437	1.22382e-06	0.0164396
Arrb1	0.14841	0.077	0.175	1.24645e-06	0.0167435
Resp18	0.0856738	0.007	0.06	1.25208e-06	0.0168192
Tmem130	0.141593	0.084	0.186	1.26937e-06	0.0170514
Atp6v0d1	0.202744	0.311	0.455	1.27965e-06	0.0171895
Calm3	0.203209	0.975	0.989	1.28472e-06	0.0172576
Cct8	0.158244	0.171	0.299	1.29213e-06	0.0173572
Rras2	0.154404	0.107	0.217	1.30379e-06	0.0175138
Clstn3	0.218542	0.146	0.259	1.32154e-06	0.0177522
Mgat4c	0.0762024	0.005	0.055	1.34636e-06	0.0180857
Sobp	0.229749	0.306	0.443	1.35363e-06	0.0181833
Vat1	0.0979796	0.021	0.089	1.36012e-06	0.0182704
Trappc8	0.0950503	0.021	0.089	1.38264e-06	0.0185729
Ppp6r3	0.11495	0.046	0.131	1.3843e-06	0.0185953
Clcn3	0.223434	0.395	0.53	1.42084e-06	0.0190861
Cep170	0.209623	0.274	0.408	1.42302e-06	0.0191154
Cox5a	-0.215818	0.883	0.805	1.44208e-06	0.0193714
Aak1	0.152646	0.155	0.282	1.45326e-06	0.0195217
9330159F19Rik	0.191153	0.21	0.339	1.46553e-06	0.0196865
Rnf38	0.140358	0.075	0.173	1.47862e-06	0.0198622
Klf16	0.0869988	0.012	0.071	1.50141e-06	0.0201685
Fry	0.258788	0.281	0.408	1.53269e-06	0.0205887
Hk1	0.196482	0.164	0.284	1.56871e-06	0.0210724
Lrrc41	0.115319	0.048	0.133	1.57465e-06	0.0211523
Apc2	0.145831	0.132	0.251	1.58097e-06	0.0212371
Satb2	0.242675	0.425	0.561	1.62447e-06	0.0218216
Hspa4l	0.182264	0.19	0.319	1.66768e-06	0.022402
Lypd6	0.109248	0.02	0.084	1.71103e-06	0.0229843
Smg7	0.150457	0.085	0.186	1.73026e-06	0.0232426
Sh3bgrl3	0.220821	0.799	0.885	1.74163e-06	0.0233953
Shank1	0.186529	0.361	0.512	1.74905e-06	0.0234949
Strip1	0.15338	0.087	0.188	1.75221e-06	0.0235374
Rbm3	-0.2218	0.87	0.818	1.76074e-06	0.023652
Lmo4	0.464692	0.397	0.499	1.86611e-06	0.0250675
Flna	0.130539	0.078	0.177	1.88475e-06	0.0253179
Tgfb1i1	0.13923	0.085	0.186	1.90933e-06	0.025648
Brsk2	0.142204	0.087	0.188	1.91388e-06	0.0257092
Arvcf	0.0929615	0.023	0.091	1.91901e-06	0.0257781
mt-Co1	0.157136	1	1	1.92149e-06	0.0258114
Capns1	0.158281	0.146	0.266	1.97448e-06	0.0265232
Add2	0.169567	0.214	0.348	1.98795e-06	0.0267042
Slc25a4	-0.1682	0.975	0.92	1.99711e-06	0.0268272
Nus1	0.173749	0.144	0.262	1.9974e-06	0.0268311
Arel1	0.142741	0.073	0.169	2.021e-06	0.0271481
Ube2j1	0.146365	0.101	0.208	2.09183e-06	0.0280995
Limk2	0.159901	0.13	0.244	2.09458e-06	0.0281365
H3f3a	-0.213072	0.911	0.856	2.12226e-06	0.0285083
mt-Nd3	0.224333	0.343	0.481	2.15252e-06	0.0289148
Gmfb	0.157389	0.094	0.197	2.15536e-06	0.028953
Vti1b	0.19444	0.409	0.559	2.19412e-06	0.0294737
Cyb5b	0.137979	0.077	0.173	2.28637e-06	0.0307128
Herc3	0.146457	0.178	0.308	2.34166e-06	0.0314556
Scn2a1	0.221111	0.694	0.794	2.37141e-06	0.0318552
Cadm2	0.228206	0.877	0.925	2.41141e-06	0.0323924
Plcxd3	0.0979796	0.021	0.086	2.41656e-06	0.0324617
Mast4	0.149912	0.069	0.162	2.41978e-06	0.0325049
Gabrg3	0.0736513	0.007	0.058	2.43113e-06	0.0326574
Capn5	0.102919	0.03	0.102	2.5366e-06	0.0340741
Khdrbs3	0.174248	0.121	0.231	2.56026e-06	0.034392
Itm2c	0.173408	0.132	0.244	2.57647e-06	0.0346097
Atxn10	0.205064	0.335	0.479	2.59919e-06	0.0349149
Eif3b	0.149877	0.087	0.186	2.62114e-06	0.0352098
Ostn	0.208801	0.028	0.098	2.65258e-06	0.0356321
Ube2z	0.160342	0.114	0.222	2.65432e-06	0.0356554
Fam219a	0.174667	0.167	0.286	2.66169e-06	0.0357545
Ubr4	0.13291	0.08	0.177	2.66427e-06	0.0357891
Wrb	0.160867	0.119	0.228	2.66685e-06	0.0358238
Ttc14	-0.247905	0.756	0.647	2.69686e-06	0.036227
Hacd3	0.15592	0.128	0.242	2.73975e-06	0.0368031
Gucy1b3	0.188039	0.27	0.408	2.81388e-06	0.0377989
Cadps	0.182022	0.198	0.326	2.83169e-06	0.038038
Scamp5	0.185195	0.196	0.322	2.84869e-06	0.0382664
Stk19	0.180542	0.253	0.386	2.87119e-06	0.0385687
Txnrd3	0.120226	0.044	0.124	2.97684e-06	0.0399879
Eif4e2	0.151648	0.155	0.275	3.01946e-06	0.0405603
Arid2	0.142811	0.089	0.188	3.04869e-06	0.0409531
Vcan	0.0937864	0.016	0.075	3.10349e-06	0.0416891
Palm	0.187414	0.381	0.528	3.12692e-06	0.0420039
Hnrnpm	0.158022	0.137	0.253	3.15737e-06	0.0424129
Rnf103	0.123762	0.06	0.149	3.16336e-06	0.0424934
Neurl1b	0.114351	0.05	0.133	3.16921e-06	0.042572
mt-Co2	0.144385	1	1	3.17039e-06	0.0425879
Zfp451	0.184246	0.18	0.299	3.26914e-06	0.0439144
Fam49b	0.219912	0.24	0.366	3.27269e-06	0.043962
Hspa4	0.187303	0.198	0.319	3.27322e-06	0.0439692
Chd5	0.161587	0.103	0.206	3.29129e-06	0.0442119
Sumo2	-0.194193	0.982	0.945	3.31662e-06	0.0445522
Ldb2	0.083575	0.011	0.064	3.38935e-06	0.0455292
Ext1	0.142356	0.114	0.222	3.50359e-06	0.0470637
Hivep2	0.200629	0.331	0.475	3.5302e-06	0.0474212
Atp8a1	0.188039	0.27	0.404	3.53852e-06	0.047533
Magee1	0.156978	0.112	0.217	3.67892e-06	0.0494189
Rasgrp2	0.185486	0.183	0.304	3.70748e-06	0.0498026
Tmem30a	0.190827	0.253	0.384	3.82904e-06	0.0514355
Smim13	0.174079	0.16	0.277	3.8329e-06	0.0514874
B4galnt1	0.171381	0.256	0.392	3.84478e-06	0.0516469
Satb1	-0.254548	0.722	0.608	3.85877e-06	0.0518348
Nptxr	0.224333	0.319	0.45	3.90574e-06	0.0524658
Atrn	0.168765	0.171	0.293	3.97294e-06	0.0533685
Trps1	0.0874371	0.014	0.071	3.99507e-06	0.0536657
Nkain2	0.111567	0.03	0.1	3.99947e-06	0.0537248
Nrxn3	0.295718	0.24	0.361	4.01722e-06	0.0539633
Ldha	0.221841	0.352	0.486	4.08012e-06	0.0548082
Mvp	0.0711046	0.009	0.06	4.08491e-06	0.0548726
Shtn1	0.213011	0.301	0.426	4.16447e-06	0.0559413
Mapk8	0.192392	0.358	0.499	4.18473e-06	0.0562135
Vps13d	0.109672	0.048	0.129	4.23345e-06	0.056868
Cdk17	0.166144	0.178	0.302	4.2623e-06	0.0572555
Dmxl2	0.203023	0.185	0.304	4.28104e-06	0.0575072
Smarca1	0.148097	0.098	0.2	4.34045e-06	0.0583052
Cecr6	0.0891737	0.021	0.084	4.34155e-06	0.0583201
Hnrnpul2	0.170012	0.21	0.335	4.36941e-06	0.0586943
Rfx3	0.185123	0.126	0.233	4.38275e-06	0.0588735
Trim32	0.204478	0.237	0.364	4.39652e-06	0.0590584
Sgsm2	0.0823839	0.018	0.078	4.4442e-06	0.0596989
Rps5	-0.188474	0.991	0.925	4.49972e-06	0.0604447
Opcml	0.237024	0.692	0.778	4.54193e-06	0.0610117
Traf4	0.13432	0.069	0.16	4.54309e-06	0.0610273
Clstn1	0.205184	0.58	0.692	4.57071e-06	0.0613984
Cacnb4	0.19406	0.181	0.297	4.73137e-06	0.0635564
Eif4g1	0.197321	0.238	0.366	4.75271e-06	0.0638431
Ap3b2	0.145757	0.089	0.186	4.7965e-06	0.0644314
Dennd1a	0.117957	0.066	0.155	4.91595e-06	0.066036
Cdh11	0.115188	0.032	0.102	4.9625e-06	0.0666612
Fbl	0.157104	0.187	0.308	4.99555e-06	0.0671052
Ctif	0.120995	0.06	0.146	5.03508e-06	0.0676362
Rps13	-0.187171	0.977	0.931	5.06943e-06	0.0680977
Setx	0.129615	0.064	0.151	5.11871e-06	0.0687597
Edem3	0.0750509	0.012	0.067	5.21153e-06	0.0700065
Cacna1b	0.175229	0.288	0.428	5.21217e-06	0.0700151
Gpd2	0.196789	0.217	0.339	5.38133e-06	0.0722874
Apba2	0.158553	0.212	0.339	5.52516e-06	0.0742195
Rps11	-0.203411	0.98	0.929	5.57331e-06	0.0748663
Dctn1	0.173158	0.246	0.375	5.57398e-06	0.0748752
Erc1	0.164759	0.221	0.348	5.59856e-06	0.0752055
Vkorc1l1	0.112096	0.069	0.16	5.66435e-06	0.0760893
Sptan1	0.230468	0.456	0.576	5.76141e-06	0.077393
Lhfp	-0.254716	0.637	0.543	5.76987e-06	0.0775066
Fam84a	0.092115	0.02	0.08	5.89312e-06	0.0791622
Atp1a3	0.182646	0.4	0.537	5.91025e-06	0.0793924
Comt	0.202944	0.528	0.663	5.98888e-06	0.0804486
Ppp1r37	0.111179	0.053	0.135	6.01407e-06	0.0807869
Vcp	0.218896	0.37	0.501	6.02171e-06	0.0808896
Casc4	0.187577	0.208	0.328	6.03822e-06	0.0811114
Ppfia2	0.153859	0.181	0.304	6.05777e-06	0.0813741
Asic2	0.131364	0.057	0.14	6.162e-06	0.0827742
Dpp9	0.103715	0.034	0.104	6.20359e-06	0.0833328
Btrc	0.105051	0.059	0.144	6.22602e-06	0.0836341
Atcay	0.16544	0.21	0.337	6.30814e-06	0.0847372
Atrnl1	0.154679	0.105	0.206	6.41422e-06	0.0861623
Tubb2a	0.409654	0.763	0.818	6.45678e-06	0.0867339
B4galt2	0.182946	0.238	0.364	6.5049e-06	0.0873804
Fam65a	0.133672	0.071	0.16	6.59407e-06	0.0885782
D17Wsu92e	0.104782	0.046	0.124	6.60135e-06	0.0886759
9530059O14Rik	0.158205	0.103	0.202	6.61927e-06	0.0889166
Abhd17b	0.153488	0.119	0.224	6.70764e-06	0.0901037
Gnai3	0.140173	0.123	0.231	6.84176e-06	0.0919053
Ythdc2	0.122457	0.089	0.186	6.91279e-06	0.0928595
Rusc1	0.161074	0.169	0.284	7.10023e-06	0.0953773
Nyap2	0.102919	0.03	0.098	7.1018e-06	0.0953985
Pgap1	0.112664	0.057	0.14	7.26226e-06	0.0975539
Rpl31	-0.169406	0.98	0.942	7.31352e-06	0.0982425
Sult4a1	0.156272	0.37	0.512	7.35513e-06	0.0988014
Hip1r	0.108528	0.043	0.118	7.48998e-06	0.100613
Midn	0.128552	0.073	0.162	7.4982e-06	0.100723
Huwe1	0.163052	0.256	0.39	7.53308e-06	0.101192
Fbxl19	0.131277	0.071	0.16	7.57673e-06	0.101778
Med13	0.136273	0.132	0.242	7.6514e-06	0.102781
Gabra3	0.0870969	0.021	0.082	7.81395e-06	0.104965
Fam149a	0.0823839	0.018	0.075	7.82588e-06	0.105125
Pkp4	0.176023	0.169	0.282	7.84724e-06	0.105412
Cmpk1	0.168096	0.375	0.523	8.11711e-06	0.109037
Fam20b	0.118581	0.06	0.144	8.23156e-06	0.110574
Lmo3	0.201794	0.198	0.313	8.32187e-06	0.111788
Ntrk3	0.174304	0.164	0.275	8.48537e-06	0.113984
St6gal2	0.187017	0.176	0.288	8.68804e-06	0.116706
Pla2g15	0.0645682	0.007	0.053	8.78111e-06	0.117957
Fam171a2	0.174389	0.103	0.2	8.8352e-06	0.118683
Sae1	0.13376	0.098	0.195	8.96219e-06	0.120389
Usp34	0.19516	0.253	0.375	8.99931e-06	0.120888
St8sia2	0.120943	0.046	0.122	9.00841e-06	0.12101
Begain	0.130283	0.068	0.153	9.15064e-06	0.122921
Dhcr24	0.188019	0.128	0.231	9.40611e-06	0.126352
Cldn12	0.0750509	0.012	0.064	9.44537e-06	0.12688
Clcn5	0.0640789	0.005	0.049	9.52091e-06	0.127894
Npnt	0.0640789	0.005	0.049	9.52091e-06	0.127894
6330403A02Rik	0.0720485	0.012	0.064	9.54574e-06	0.128228
Akt1	0.159563	0.151	0.262	9.6018e-06	0.128981
Camk1	0.187837	0.372	0.506	9.67316e-06	0.12994
Ptms	0.231616	0.653	0.774	9.69581e-06	0.130244
Tspan2	0.0574746	0.004	0.044	9.70499e-06	0.130367
Rimklb	0.197884	0.294	0.419	9.88437e-06	0.132777
Ap1s1	0.177596	0.343	0.479	9.90792e-06	0.133093
Slc4a7	0.122427	0.075	0.164	9.96316e-06	0.133835
Smarca4	0.172511	0.208	0.328	9.96703e-06	0.133887
Syt4	0.223543	0.795	0.865	1.01297e-05	0.136073
Gpd1l	0.119364	0.077	0.166	1.02213e-05	0.137303
Gprin1	0.1938	0.214	0.33	1.03076e-05	0.138462
Lgi1	0.151433	0.135	0.242	1.04905e-05	0.140918
Peg3	0.165005	0.249	0.377	1.08608e-05	0.145893
Cmas	0.143238	0.116	0.217	1.088e-05	0.146152
Matn4	-0.098377	0.087	0.022	1.08813e-05	0.146169
Tbc1d24	0.161764	0.148	0.257	1.10526e-05	0.14847
Cnot1	0.122769	0.08	0.171	1.11983e-05	0.150427
Plcb4	0.0925693	0.034	0.102	1.12328e-05	0.15089
Scrn1	0.205797	0.301	0.419	1.13587e-05	0.152582
Atp6v0e2	-0.208374	0.817	0.732	1.13897e-05	0.152998
Rragd	0.166187	0.137	0.242	1.16662e-05	0.156712
Adam23	0.142281	0.101	0.197	1.16995e-05	0.157159
Gnl3l	0.173607	0.198	0.315	1.17056e-05	0.157241
Slc35f4	-0.22702	0.352	0.235	1.17167e-05	0.15739
Gpr85	0.206799	0.283	0.401	1.17355e-05	0.157642
Ptprz1	0.0900322	0.025	0.086	1.19505e-05	0.160531
Nckap1	0.220344	0.377	0.51	1.19698e-05	0.16079
Tpm4	0.113983	0.05	0.126	1.21091e-05	0.162661
Pacs2	0.142281	0.1	0.195	1.23266e-05	0.165583
Mycn	0.133233	0.08	0.169	1.24106e-05	0.166711
Klhl1	0.0971252	0.03	0.095	1.25226e-05	0.168215
Noc2l	0.121347	0.062	0.144	1.2608e-05	0.169363
Prkar1a	0.182755	0.363	0.494	1.27378e-05	0.171107
Mtmr4	0.151318	0.091	0.182	1.28159e-05	0.172156
Ykt6	0.181023	0.342	0.468	1.28358e-05	0.172423
Fam20c	0.112664	0.06	0.142	1.29484e-05	0.173936
Agpat3	0.159053	0.149	0.257	1.3015e-05	0.174831
Ube2ql1	0.1652	0.174	0.286	1.32281e-05	0.177692
Prrc2b	0.181039	0.322	0.448	1.33079e-05	0.178765
Clptm1l	0.127507	0.077	0.164	1.34682e-05	0.180918
Sppl3	0.175957	0.144	0.248	1.35225e-05	0.181648
Slit2	0.0725177	0.014	0.067	1.36143e-05	0.182881
Rc3h1	0.121393	0.078	0.166	1.38749e-05	0.186381
Mdp1	0.161203	0.198	0.315	1.39004e-05	0.186725
Osbpl8	0.133876	0.085	0.175	1.42386e-05	0.191268
Cpd	0.143413	0.096	0.188	1.42736e-05	0.191737
Rpl26	-0.174543	0.989	0.951	1.43292e-05	0.192485
Maz	0.127725	0.117	0.22	1.43476e-05	0.192731
Astn1	0.192281	0.226	0.344	1.44523e-05	0.194137
Rit2	0.100366	0.044	0.118	1.44662e-05	0.194325
Rbpj	0.10243	0.037	0.106	1.45785e-05	0.195833
Spast	0.135328	0.105	0.202	1.49079e-05	0.200258
Pabpn1	0.145204	0.206	0.328	1.50837e-05	0.202619
Bhlhb9	0.141844	0.126	0.228	1.51858e-05	0.203991
Fam101b	0.0950503	0.032	0.098	1.53124e-05	0.205692
Vps39	0.0879609	0.027	0.089	1.54201e-05	0.207138
Tnr	0.0855818	0.036	0.104	1.54237e-05	0.207187
Mapre1	0.203371	0.406	0.523	1.56668e-05	0.210452
Arf6	0.119712	0.084	0.173	1.62718e-05	0.218579
Rpl34	-0.184158	0.963	0.931	1.63965e-05	0.220254
Akap11	0.182707	0.247	0.368	1.64173e-05	0.220534
Rcn1	0.0615277	0.007	0.051	1.65614e-05	0.222469
Mtpn	0.217224	0.669	0.756	1.68656e-05	0.226556
Cd276	0.0807619	0.023	0.082	1.71356e-05	0.230182
Atp9b	0.0807619	0.023	0.082	1.71356e-05	0.230182
Epb41l1	0.172938	0.169	0.275	1.71918e-05	0.230938
Pnmal1	0.126162	0.071	0.155	1.73454e-05	0.233001
Dlg2	0.178093	0.32	0.446	1.77438e-05	0.238353
Ampd2	0.0768923	0.02	0.075	1.84591e-05	0.247961
Usp5	0.150373	0.117	0.215	1.85596e-05	0.249311
Ap2a2	0.182513	0.331	0.457	1.8958e-05	0.254663
Cdk6	0.0867637	0.034	0.1	1.90916e-05	0.256457
Tnpo1	0.110428	0.05	0.124	1.91807e-05	0.257654
Magi1	0.106068	0.041	0.111	1.9204e-05	0.257968
Phyh	0.108528	0.043	0.113	1.94082e-05	0.260711
Pdp1	0.113983	0.052	0.126	1.94213e-05	0.260886
Zc3h7b	0.143176	0.101	0.195	1.95715e-05	0.262904
Slc39a3	0.115809	0.06	0.14	1.95824e-05	0.26305
Ppp2r5b	0.160653	0.265	0.388	2.02231e-05	0.271656
Hist1h1c	0.0962999	0.025	0.084	2.04179e-05	0.274273
Dnajc6	0.154384	0.151	0.257	2.04835e-05	0.275155
Mbp	0.0909342	0.036	0.102	2.07909e-05	0.279285
Arih1	0.156067	0.142	0.246	2.09355e-05	0.281226
Msrb2	-0.162958	0.267	0.157	2.11239e-05	0.283758
Nap1l5	0.171551	0.262	0.392	2.14783e-05	0.288518
Slc39a6	0.115928	0.077	0.162	2.16285e-05	0.290536
Thra	0.186635	0.897	0.951	2.17087e-05	0.291613
Apeh	0.065541	0.011	0.058	2.1787e-05	0.292665
Ormdl3	0.124798	0.148	0.255	2.18733e-05	0.293824
Csnk1g2	0.113188	0.075	0.16	2.20574e-05	0.296297
Papola	0.166124	0.222	0.337	2.20806e-05	0.296609
Megf9	0.162358	0.181	0.293	2.21811e-05	0.297959
Slc22a3	0.0690397	0.011	0.058	2.22958e-05	0.2995
Prkar1b	0.203924	0.402	0.521	2.22979e-05	0.299527
Prrc2a	0.135973	0.139	0.242	2.23077e-05	0.299659
Cpeb4	0.20508	0.208	0.317	2.25561e-05	0.302996
Tpgs2	0.152567	0.226	0.346	2.28802e-05	0.30735
Mgrn1	0.156978	0.144	0.246	2.29099e-05	0.307749
Rundc3a	0.17509	0.461	0.581	2.33448e-05	0.31359
Bag6	0.138387	0.121	0.22	2.34157e-05	0.314543
Prpf40b	0.105051	0.062	0.142	2.37483e-05	0.319011
Rab11a	0.183793	0.5	0.621	2.37935e-05	0.319619
Gramd1a	0.15949	0.189	0.299	2.39396e-05	0.321581
Rab12	0.150114	0.208	0.324	2.41449e-05	0.324339
Mark2	0.132411	0.13	0.233	2.43711e-05	0.327377
Apba1	0.0994083	0.069	0.153	2.45226e-05	0.329413
Vamp2	-0.198043	0.909	0.891	2.45528e-05	0.329817
Thbs3	0.0764346	0.018	0.071	2.45732e-05	0.330092
Rabgap1l	0.160616	0.203	0.317	2.4925e-05	0.334817
Srgap1	0.090459	0.027	0.086	2.49394e-05	0.335011
Shisa9	0.0801309	0.009	0.053	2.54806e-05	0.342281
Lasp1	0.157344	0.205	0.319	2.57668e-05	0.346125
Coro1a	0.172948	0.253	0.37	2.57708e-05	0.34618
Nampt	0.0859008	0.032	0.095	2.57988e-05	0.346556
Braf	0.130465	0.094	0.184	2.60874e-05	0.350432
Gdi1	0.211497	0.61	0.714	2.61831e-05	0.351717
Pcbp4	0.197088	0.56	0.663	2.61896e-05	0.351805
Tox	0.0472025	0	0.031	2.63017e-05	0.353311
Podxl2	0.187694	0.407	0.532	2.6483e-05	0.355747
2700081O15Rik	0.116849	0.094	0.186	2.67694e-05	0.359593
Acat2	0.147518	0.112	0.206	2.6784e-05	0.35979
Ehbp1l1	0.149927	0.274	0.401	2.71328e-05	0.364475
Cux1	-0.204938	0.706	0.592	2.75137e-05	0.369591
Pnma2	0.147518	0.157	0.262	2.75622e-05	0.370242
Tbc1d16	0.150932	0.119	0.215	2.7651e-05	0.371435
Hipk3	0.109125	0.059	0.135	2.77744e-05	0.373094
Dclk2	0.117505	0.059	0.135	2.77744e-05	0.373094
Zmiz1	0.127801	0.096	0.186	2.81758e-05	0.378485
Morf4l1	-0.17651	0.936	0.925	2.82034e-05	0.378856
Nr2f1	-0.222281	0.73	0.652	2.83556e-05	0.3809
Spock2	0.165896	0.214	0.328	2.86882e-05	0.385369
Wwp1	0.122119	0.089	0.177	2.89155e-05	0.388422
Mapk1ip1l	0.138919	0.084	0.169	2.89597e-05	0.389015
Dusp26	0.16175	0.404	0.53	2.91149e-05	0.391101
Ubfd1	0.109876	0.059	0.135	2.93831e-05	0.394704
Ppfibp1	0.103796	0.066	0.146	2.93906e-05	0.394803
Hnrnpd	0.161385	0.18	0.286	2.97862e-05	0.400118
Scn9a	0.0958651	0.048	0.12	3.01787e-05	0.405391
Stk40	0.0615277	0.007	0.049	3.09324e-05	0.415515
Trappc11	0.0720485	0.012	0.06	3.12747e-05	0.420114
Ppfia4	0.101333	0.078	0.164	3.14454e-05	0.422407
Gm20752	-0.0678971	0.053	0.007	3.15122e-05	0.423303
Rpl27a	-0.166252	0.993	0.971	3.17263e-05	0.42618
Tnks2	0.166609	0.192	0.302	3.18729e-05	0.428148
Lingo1	0.203658	0.445	0.559	3.2e-05	0.429855
Pim2	0.0842869	0.034	0.098	3.25027e-05	0.436609
Actr1a	0.165223	0.276	0.395	3.31012e-05	0.444648
Cycs	-0.200103	0.826	0.729	3.31452e-05	0.44524
Plpp6	0.0699888	0.016	0.067	3.32699e-05	0.446914
Kidins220	0.156006	0.215	0.328	3.34721e-05	0.44963
Sestd1	0.132318	0.149	0.255	3.36738e-05	0.452339
St3gal1	0.0477303	0.002	0.035	3.3681e-05	0.452437
Pkm	0.19158	0.326	0.448	3.37468e-05	0.453321
Dusp8	0.129453	0.158	0.266	3.42085e-05	0.459523
Impad1	0.195565	0.302	0.41	3.43219e-05	0.461046
Lrrtm1	0.122962	0.173	0.286	3.43585e-05	0.461537
Csde1	0.16509	0.461	0.592	3.45262e-05	0.463791
Rad23b	0.180664	0.345	0.466	3.45414e-05	0.463995
Tom1l2	0.111179	0.055	0.129	3.55381e-05	0.477383
Scg2	0.105051	0.062	0.14	3.55548e-05	0.477607
Clstn2	0.160917	0.23	0.346	3.56166e-05	0.478438
Robo1	0.0544083	0.004	0.04	3.59991e-05	0.483576
Dgcr6	0.180775	0.413	0.53	3.61939e-05	0.486193
6430548M08Rik	0.0825377	0.03	0.091	3.66457e-05	0.492261
Npdc1	-0.232408	0.829	0.789	3.67172e-05	0.493222
Adgrl3	0.165884	0.237	0.353	3.72222e-05	0.500006
Kcnb2	0.127653	0.132	0.233	3.74891e-05	0.503591
Ypel3	-0.217302	0.845	0.772	3.77324e-05	0.50686
March9	0.132029	0.06	0.135	3.80094e-05	0.51058
Set	0.198285	0.423	0.543	3.81907e-05	0.513016
Scn1b	0.105432	0.066	0.144	3.88498e-05	0.521869
Pdpk1	0.120854	0.11	0.204	3.93292e-05	0.528309
Snx8	0.0625133	0.011	0.055	3.99186e-05	0.536227
Ppp1r9a	0.164334	0.249	0.364	3.99333e-05	0.536424
Tnpo2	0.13376	0.096	0.184	4.01358e-05	0.539144
BC005537	0.183654	0.4	0.53	4.01768e-05	0.539695
Plppr2	0.151671	0.267	0.388	4.02241e-05	0.54033
Wnk2	0.111729	0.069	0.149	4.02921e-05	0.541243
Tcaf1	0.196736	0.297	0.408	4.05544e-05	0.544767
Scn1a	0.138986	0.123	0.217	4.06386e-05	0.545898
C130026L21Rik	0.0743767	0.021	0.075	4.07791e-05	0.547785
Rnf19b	0.109538	0.08	0.164	4.12496e-05	0.554106
Galt	0.142486	0.231	0.35	4.163e-05	0.559215
Pitpna	0.172356	0.301	0.417	4.19147e-05	0.56304
Oat	0.0859008	0.032	0.093	4.19422e-05	0.563409
Cmtm4	0.0962849	0.039	0.104	4.24871e-05	0.570729
Lrrc3b	0.0718655	0.021	0.075	4.26305e-05	0.572656
Sbk1	0.14425	0.158	0.262	4.26405e-05	0.57279
Flii	0.0816531	0.027	0.084	4.29155e-05	0.576484
Csk	0.112664	0.06	0.135	4.43979e-05	0.596397
Ldb1	0.0876201	0.039	0.104	4.44744e-05	0.597425
Myh14	0.0757525	0.021	0.075	4.45065e-05	0.597855
Clec2l	0.127543	0.064	0.14	4.47831e-05	0.601571
Lgmn	0.0796024	0.027	0.084	4.49494e-05	0.603805
Wdr48	0.0954585	0.048	0.118	4.53183e-05	0.608761
Acvr1b	0.119778	0.094	0.182	4.53826e-05	0.609625	Septa
Ncoa5	0.138428	0.098	0.184	4.53869e-05	0.609682
Pabpc1	0.21595	0.537	0.636	4.56603e-05	0.613355
Trove2	0.124798	0.133	0.233	4.61759e-05	0.620281
Smarcc2	0.162212	0.21	0.319	4.62838e-05	0.62173
Pi4ka	0.133332	0.107	0.197	4.64807e-05	0.624375
Lrrc16b	0.0987135	0.048	0.118	4.6524e-05	0.624956
Fbxl5	0.139162	0.173	0.279	4.67861e-05	0.628477
Pacs1	0.115809	0.064	0.14	4.68551e-05	0.629404
Stau2	0.156749	0.276	0.392	4.69155e-05	0.630215
Arglu1	0.190531	0.393	0.508	4.71468e-05	0.633322
Trak2	0.130425	0.144	0.246	4.71913e-05	0.633921
Ubqln2	0.198007	0.249	0.357	4.78392e-05	0.642624
Mgea5	0.17509	0.269	0.384	4.79063e-05	0.643525
Prpf39	0.108528	0.043	0.109	4.79622e-05	0.644277
Mex3b	0.107608	0.052	0.122	4.80256e-05	0.645128
Kif3c	0.151765	0.126	0.22	4.81263e-05	0.646481
Dzip3	0.148898	0.141	0.239	4.81651e-05	0.647001
Phf10	0.117345	0.08	0.162	4.90721e-05	0.659186
Cd99l2	0.127279	0.162	0.268	4.91959e-05	0.660848
Rab40c	0.110249	0.062	0.137	4.99832e-05	0.671424
Bcas3	0.0850315	0.028	0.086	5.00416e-05	0.672209
Slc16a2	0.0883904	0.028	0.086	5.05207e-05	0.678644
Lrrc4b	0.178512	0.214	0.324	5.10453e-05	0.685692
Wac	0.147081	0.343	0.481	5.17513e-05	0.695175
Lamtor5	-0.18122	0.61	0.501	5.18207e-05	0.696108
Cic	0.136273	0.132	0.228	5.19065e-05	0.69726
Dtnb	0.0991131	0.052	0.122	5.21326e-05	0.700297
Gnaq	0.193234	0.591	0.678	5.25644e-05	0.706097
Fdft1	0.142492	0.198	0.306	5.26426e-05	0.707148
Vps26b	0.142651	0.119	0.211	5.26791e-05	0.707639
Slc2a3	0.124126	0.091	0.175	5.34455e-05	0.717933
Adam19	0.0938313	0.05	0.12	5.35325e-05	0.719102
AU040320	0.093441	0.059	0.133	5.42618e-05	0.728899
Nlgn2	0.158837	0.238	0.355	5.43674e-05	0.730317
Sept11	0.152059	0.174	0.279	5.44798e-05	0.731827
Stard7	0.166038	0.338	0.457	5.45868e-05	0.733264
Rps3	-0.145299	0.984	0.949	5.47584e-05	0.735569
Ckap4	0.106676	0.093	0.18	5.48856e-05	0.737279
Plxna3	0.093422	0.052	0.122	5.50487e-05	0.739469
Map1a	0.140565	0.237	0.357	5.51579e-05	0.740936
Fbrs	0.100764	0.043	0.109	5.55176e-05	0.745767
Slc30a10	0.0709307	0.02	0.071	5.60275e-05	0.752618
Syt16	0.151481	0.247	0.364	5.65681e-05	0.759879
Sphkap	0.168579	0.29	0.406	5.66617e-05	0.761137
Cstf2t	0.121778	0.093	0.177	5.67071e-05	0.761746
Ing2	0.12109	0.157	0.262	5.72155e-05	0.768575
Asxl3	0.105432	0.068	0.144	5.88417e-05	0.790421
Copa	0.166313	0.262	0.373	5.95985e-05	0.800587
Mta1	0.117957	0.073	0.151	6.00314e-05	0.806401
Mrpl34	0.139153	0.326	0.45	6.05033e-05	0.812741
H2afz	0.237838	0.802	0.843	6.05728e-05	0.813675
Zdhhc21	0.119434	0.091	0.175	6.07001e-05	0.815385
March4	0.0942391	0.053	0.124	6.10083e-05	0.819524
Bri3	0.169525	0.397	0.519	6.10722e-05	0.820383
Eif1a	0.15106	0.151	0.251	6.12882e-05	0.823284
Hivep1	0.0829774	0.03	0.089	6.1376e-05	0.824464
Nsmf	0.159112	0.456	0.574	6.14479e-05	0.82543
Zcchc18	0.16729	0.313	0.43	6.2493e-05	0.839468
Strap	0.14579	0.251	0.368	6.28908e-05	0.844812
Ppp1r9b	0.140087	0.146	0.244	6.43602e-05	0.86455
Plekha5	0.112664	0.059	0.131	6.60187e-05	0.886829
Camk1d	0.10727	0.098	0.186	6.65574e-05	0.894066
Rora	-0.178515	0.477	0.353	6.72391e-05	0.903222
Ube2q1	0.100631	0.069	0.146	6.74886e-05	0.906574
Copb1	0.124798	0.066	0.14	6.77654e-05	0.910293
C2cd2l	0.120803	0.096	0.182	6.82192e-05	0.916389
Hdac11	0.106944	0.073	0.151	6.87612e-05	0.923669
Cacnb1	0.110442	0.071	0.149	6.877e-05	0.923788
Wdr26	0.138432	0.18	0.286	6.87915e-05	0.924076
Tmie	0.0605344	0.004	0.038	6.8815e-05	0.924392
Htr7	0.0544083	0.004	0.038	6.90735e-05	0.927864
Fnbp1	0.0829774	0.032	0.091	6.91356e-05	0.928698
Kpna3	0.154683	0.224	0.335	6.9202e-05	0.929591
Fgf10	0.0482561	0.004	0.038	6.95901e-05	0.934804
Ip6k1	0.119372	0.137	0.235	7.12821e-05	0.957533
Pcdhb3	0.0457004	0.004	0.038	7.19237e-05	0.966151
Dcun1d4	0.110249	0.062	0.135	7.20387e-05	0.967696
Gdi2	0.176627	0.322	0.435	7.21245e-05	0.968849
Fchsd2	0.10148	0.059	0.131	7.22437e-05	0.97045
Armcx2	0.12681	0.093	0.175	7.22708e-05	0.970814
Elavl4	0.154131	0.45	0.585	7.22716e-05	0.970824
Syn1	0.185386	0.372	0.49	7.26482e-05	0.975883
Jak2	0.0594793	0.011	0.053	7.28017e-05	0.977945
Ina	0.188842	0.265	0.37	7.29112e-05	0.979416
Rab5b	0.119843	0.105	0.193	7.3127e-05	0.982315
Bbc3	0.115135	0.119	0.213	7.37026e-05	0.990047
Evl	0.164999	0.251	0.361	7.46929e-05	1
Msx3	-0.0991519	0.085	0.027	7.50996e-05	1
Foxp1	-0.177439	0.904	0.854	7.55342e-05	1
Nat8l	0.104936	0.075	0.153	7.57625e-05	1
Cdkl2	0.136734	0.217	0.328	7.57701e-05	1
Pkd1	0.0732544	0.027	0.082	7.66474e-05	1
Macrod2	0.164468	0.356	0.477	7.71857e-05	1
Cds2	0.130565	0.13	0.224	7.7245e-05	1
Psme3	0.0958462	0.071	0.149	7.72715e-05	1
Gyg	0.114626	0.082	0.162	7.75492e-05	1
Spock3	0.122395	0.068	0.142	7.77626e-05	1
Erc2	0.16785	0.249	0.357	7.77719e-05	1
Celf5	0.184289	0.363	0.477	7.7914e-05	1
Grin2a	0.139881	0.251	0.368	7.81366e-05	1
Kcnb1	0.134269	0.116	0.204	7.81972e-05	1
Negr1	-0.200589	0.74	0.656	7.82106e-05	1
Ipo13	0.113764	0.068	0.142	7.84591e-05	1
Ctsb	0.150196	0.263	0.379	7.86978e-05	1
Dlg4	0.172738	0.231	0.339	7.95994e-05	1
Atp6v1g2	-0.183083	0.758	0.701	7.96463e-05	1
Pithd1	0.105313	0.075	0.153	8.01232e-05	1
Celf2	0.181438	0.995	0.982	8.0278e-05	1
Hmgn3	0.187062	0.646	0.723	8.05372e-05	1
Slitrk4	0.125132	0.093	0.175	8.05489e-05	1
Tubb5	0.162135	0.993	0.998	8.11746e-05	1
Mturn	0.174018	0.222	0.326	8.13245e-05	1
Abca3	0.13312	0.139	0.233	8.17839e-05	1
Tmem158	0.165866	0.263	0.379	8.21817e-05	1
Matk	0.181396	0.61	0.714	8.21976e-05	1
Ndufb9	-0.187337	0.79	0.721	8.23128e-05	1
Adam22	0.16418	0.31	0.421	8.26738e-05	1
Snx2	0.102258	0.064	0.137	8.31147e-05	1
Snx24	0.0820962	0.028	0.084	8.33218e-05	1
Chd8	0.139048	0.162	0.262	8.37979e-05	1
Vcpip1	0.135502	0.121	0.211	8.44457e-05	1
Srf	0.0748371	0.023	0.075	8.4503e-05	1
Flrt3	0.109538	0.08	0.16	8.49025e-05	1
Hps3	0.0718655	0.023	0.075	8.58356e-05	1
Snrk	0.108856	0.101	0.188	8.64176e-05	1
Sipa1l1	0.127438	0.105	0.191	8.70092e-05	1
Slc25a46	0.144294	0.176	0.277	8.70677e-05	1
Phyhip	0.146484	0.208	0.317	8.73518e-05	1
Gm27032	0.127438	0.109	0.195	8.78512e-05	1
Pak6	0.146733	0.196	0.299	8.79363e-05	1
Ppp2r4	0.154968	0.178	0.277	8.95088e-05	1
Plppr4	0.189081	0.425	0.528	9.05862e-05	1
Dync1li2	0.131799	0.141	0.235	9.08487e-05	1
Gars	0.121604	0.133	0.228	9.13334e-05	1
Pde4d	0.115212	0.068	0.142	9.14047e-05	1
G3bp1	0.145855	0.151	0.246	9.28829e-05	1
Gm26917	0.158072	0.217	0.322	9.29344e-05	1
B4galt5	0.12148	0.101	0.186	9.30633e-05	1
Gpcpd1	-0.179895	0.58	0.47	9.35338e-05	1
Gm10036	0.109413	0.116	0.206	9.36151e-05	1
1110017D15Rik	0.0709307	0.02	0.069	9.53851e-05	1
Mknk2	0.0709307	0.02	0.069	9.53851e-05	1
Diras2	0.138931	0.133	0.226	9.56728e-05	1
1810043H04Rik	0.161381	0.237	0.344	9.62198e-05	1
Herc2	0.152812	0.23	0.339	9.65101e-05	1
Adgrb2	0.151775	0.233	0.341	9.68045e-05	1
Stk16	0.145007	0.244	0.355	9.68944e-05	1
Rab9b	0.0859008	0.03	0.086	9.74128e-05	1
Ptpn5	0.154746	0.144	0.237	9.77216e-05	1
Slc12a2	0.0921504	0.03	0.086	9.78479e-05	1
Lrfn1	0.132805	0.093	0.173	9.83275e-05	1
Slco3a1	0.116284	0.078	0.155	9.89823e-05	1
Tle3	0.12287	0.135	0.228	9.92367e-05	1
Pcyt1b	0.0897335	0.044	0.109	9.94474e-05	1
Dmrtb1	0.078255	0.025	0.078	9.99477e-05	1
2610002M06Rik	0.119712	0.084	0.162	0.0001006	1
Zfp580	0.15607	0.379	0.503	0.00010127	1
Dhx32	0.106703	0.06	0.131	0.000101922	1
Grn	0.0909342	0.037	0.098	0.000103521	1
Tbr1	0.10148	0.057	0.126	0.000103847	1
Adam10	0.164053	0.21	0.313	0.000104637	1
Klhdc10	0.141924	0.142	0.235	0.000105087	1
Rab22a	0.113179	0.151	0.251	0.0001052	1
Dnajc5	0.191511	0.498	0.599	0.000105478	1
Zfp697	0.112425	0.094	0.177	0.000105668	1
Ttbk2	0.0934779	0.078	0.157	0.000106407	1
Kcnmb4	0.124217	0.219	0.333	0.000106921	1
Itm2a	0.0584808	0.007	0.044	0.000107571	1
Pdzd4	0.136564	0.114	0.2	0.00010852	1
Zmym5	0.107461	0.064	0.135	0.000112267	1
Reps1	0.0880459	0.039	0.1	0.000112611	1
1110034G24Rik	-0.143247	0.23	0.135	0.000112742	1
Fam19a2	-0.17615	0.582	0.472	0.000112932	1
Wdr17	0.0800481	0.032	0.089	0.000113194	1
Rprm	0.241376	0.162	0.253	0.000113906	1
Syt13	0.0901515	0.048	0.113	0.000114699	1
Ndst1	0.0771128	0.032	0.089	0.000115401	1
Wasf1	0.188244	0.573	0.69	0.000115443	1
Ulk2	0.148843	0.19	0.29	0.000116339	1
Hs6st1	0.13103	0.149	0.246	0.000116614	1
Tmem259	0.114982	0.082	0.16	0.000116854	1
Dhx15	0.104755	0.117	0.208	0.000118302	1
Pcyox1	0.120726	0.155	0.253	0.000118335	1
Zmat3	0.121234	0.121	0.211	0.000118759	1
Trim35	0.159671	0.247	0.353	0.000119767	1
B3galt2	0.102938	0.078	0.155	0.000120464	1
Ckap5	0.115354	0.121	0.211	0.00012205	1
Lpcat4	0.0727932	0.027	0.08	0.000122289	1
Ptprt	0.061032	0.005	0.04	0.000122503	1
Pgrmc1	0.178379	0.447	0.565	0.000123524	1
Eid1	0.198465	0.674	0.743	0.000123705	1
Kbtbd11	0.090568	0.05	0.115	0.00012372	1
Mark4	0.134762	0.126	0.215	0.000123895	1
Srrm2	-0.215126	0.733	0.683	0.000124527	1
Arhgdia	0.179766	0.379	0.488	0.000126758	1
Lrfn4	0.109059	0.114	0.202	0.000126853	1
Trib1	0.0415385	0.002	0.031	0.000128171	1
Sdha	0.120352	0.139	0.233	0.000128268	1
Picalm	0.142975	0.174	0.273	0.000128505	1
Arhgap32	0.133018	0.144	0.237	0.000128643	1
Arhgap1	0.105812	0.068	0.14	0.000128976	1
Cenpb	0.12611	0.11	0.195	0.000129083	1
Plagl1	0.0462286	0.005	0.04	0.000129178	1
Csrnp3	0.147745	0.317	0.435	0.000130301	1
Ccny	0.114051	0.089	0.169	0.000130305	1
Rab3a	-0.18121	0.87	0.805	0.000131095	1
Cntnap2	0.10763	0.103	0.188	0.000131423	1
Slc12a5	0.164624	0.315	0.426	0.000132595	1
Adrbk1	0.125747	0.144	0.237	0.000133894	1
Trim33	0.102094	0.087	0.166	0.000133975	1
Frrs1l	0.117635	0.263	0.384	0.000135043	1
Gprasp2	0.111924	0.059	0.126	0.000135393	1
Atp6v1h	0.155692	0.164	0.257	0.000136155	1
Bcl7a	0.148809	0.215	0.319	0.000136453	1
Mllt3	0.119843	0.107	0.191	0.000136748	1
Btaf1	0.0634914	0.014	0.058	0.000137018	1
Grm7	0.16544	0.269	0.377	0.000137109	1
Brf1	0.0750819	0.034	0.091	0.000137153	1
Bmi1	0.0942391	0.053	0.12	0.000138156	1
Kif13a	0.06047	0.014	0.058	0.000138528	1
Cacna1a	0.125736	0.158	0.255	0.000138849	1
Usp24	0.0852693	0.052	0.118	0.000139952	1
Mllt1	0.0762077	0.028	0.082	0.000140259	1
Ptprf	0.15949	0.18	0.277	0.000141466	1
Lmtk3	0.116503	0.1	0.182	0.000141784	1
Ptges3	0.140923	0.411	0.543	0.000141936	1
Per3	-0.139906	0.199	0.113	0.000142119	1	Hollow	YES
Cpeb3	0.0718655	0.023	0.073	0.000142762	1
Rrn3	0.083122	0.043	0.104	0.000142962	1
Got2	0.132633	0.192	0.293	0.000144745	1
Rraga	0.14112	0.185	0.284	0.000145173	1
Stc1	0.121656	0.052	0.115	0.000146066	1
Fam117b	0.117193	0.109	0.193	0.000146194	1
Exoc5	0.157219	0.226	0.33	0.000146218	1
Ap3m1	0.0979099	0.046	0.109	0.000146474	1
Ppp4r1	0.0780112	0.036	0.093	0.000147733	1
Kdm2b	0.138347	0.149	0.242	0.000148391	1
Icam5	0.0693586	0.023	0.073	0.00014862	1
Dagla	0.0668561	0.023	0.073	0.0001488	1
Iws1	0.106676	0.094	0.175	0.0001501	1
Manbal	-0.205615	0.575	0.49	0.000151902	1
Enah	0.128572	0.226	0.335	0.000151979	1
Rprml	0.240409	0.333	0.432	0.000152578	1
Paqr9	0.121322	0.146	0.239	0.000153026	1
Kpnb1	0.135808	0.123	0.208	0.000153801	1
Dclk1	0.209715	0.795	0.885	0.000154329	1
Nova2	0.111879	0.107	0.191	0.00015504	1
Ctbp1	0.184371	0.24	0.337	0.000156399	1
Ptk2b	0.146428	0.162	0.255	0.000156501	1
Vps52	0.101791	0.075	0.149	0.000158429	1
Ssh2	0.110813	0.1	0.182	0.000158911	1
Cbarp	0.15677	0.367	0.479	0.0001592	1
Strn	0.113032	0.064	0.133	0.00015955	1
Far1	0.142492	0.189	0.288	0.000159715	1
March1	-0.169456	0.514	0.392	0.000163633	1
Carhsp1	0.058981	0.009	0.047	0.000163743	1
Alyref	0.104393	0.05	0.113	0.000164691	1
Trim44	0.134802	0.214	0.317	0.000164812	1
Ndc1	0.0649445	0.02	0.067	0.00016587	1
Phip	0.117564	0.148	0.242	0.000166957	1
Papd7	0.0905141	0.039	0.098	0.00016743	1
Dhx30	-0.197993	0.669	0.583	0.000167514	1
Sos1	0.10148	0.06	0.129	0.000167749	1
Spred1	0.0987135	0.05	0.113	0.000168947	1
Creg2	0.141016	0.205	0.306	0.00016898	1
Sacm1l	0.0876201	0.039	0.098	0.000171114	1
Sh3gl3	0.0757525	0.025	0.075	0.000171291	1
Ncs1	0.124798	0.199	0.304	0.000171298	1
Atn1.1	0.126435	0.114	0.197	0.000172166	1
[truncated: 12,240 more rows]
