# Supplementary material for: Thalamocortical control of cell-type specificity drives a circuit for processing whisker-related information in mouse barrel cortex
Source: Research Square preprint supplement (doi:10.21203/rs.3.rs-2347992/v1), 2023-01-06
Supplement: Supplementary file 2 [file 80ebff1c7532366ee8fbe6bc.xlsx]

## Sheet: Summary
Table	Description
1. Genes used for L4 clustering	List of genes that were used in L4 clustering analysis; DEG data from Visium_Celsr3cKO_vs_Cont_DEG (Supplementary Table 2)
2. Genes screened with ISH	List of genes that displayed hollow/septa ISH expression patterns in mouse barrel cortex
Term	Explanation
Pattern	Barrel ctx ISH pattern
Clustering gene	Used for L4 clustering

## Sheet: 1. Genes used for L4 clustering
Gene	baseMean	log2FoldChange	lfcSE	stat	pvalue	padj	Pattern
Whrn	1.58139	-2.40659	0.267287	-9.00377	2.18103e-19	7.00594e-17	Hollow
Hlf	1.48301	-2.00827	0.240138	-8.36299	6.11465e-17	1.46232e-14	Hollow
Sema7a	5.27316	-1.13668	0.139363	-8.15625	3.45576e-16	7.03358e-14	Hollow
Dbp	1.70213	-1.68533	0.221409	-7.6118	2.70296e-14	4.23877e-12	Hollow
Pde8b	1.96445	-1.44064	0.195447	-7.37098	1.69378e-13	2.38276e-11	Hollow
Plxnd1	4.25815	-1.28005	0.181734	-7.04355	1.87401e-12	2.21318e-10	Hollow
Usp2	1.623	-1.331	0.219683	-6.05872	1.37207e-09	1.00192e-07	Hollow
Btbd3	1.56366	-1.48919	0.255918	-5.81901	5.91966e-09	3.70114e-07	Hollow
Barx2	0.675062	-1.7536	0.314821	-5.57015	2.54514e-08	1.3678e-06	Hollow
Rasd2	1.34413	-1.40602	0.253177	-5.5535	2.80009e-08	1.49641e-06	Hollow
Pamr1	1.43185	-1.26233	0.232532	-5.42864	5.67862e-08	2.82926e-06	Hollow
Dapk2	0.74129	-1.63456	0.313211	-5.21871	1.80173e-07	7.97935e-06	Hollow
Npas2	0.652371	-1.64028	0.318171	-5.15535	2.53164e-07	1.06218e-05	Hollow
Nr1d1	1.66492	-0.970737	0.205416	-4.72572	2.29304e-06	7.43567e-05	Hollow
Grm4	1.21302	-1.20974	0.256206	-4.72174	2.3384e-06	7.5317e-05	Hollow
Rasl10a	2.22377	-0.869241	0.18463	-4.70802	2.5014e-06	7.97614e-05	Hollow
Ier5	1.61136	-0.991258	0.22023	-4.50101	6.76298e-06	0.000195452	Hollow
Kitl	2.5897	-0.907601	0.205411	-4.41845	9.9409e-06	0.000263374	Hollow
Per3	0.742318	-1.359	0.327613	-4.14818	3.35122e-05	0.000742078	Hollow
Minar1	1.5369	-0.855733	0.22055	-3.87999	0.000104461	0.00200255	Hollow
Hrh3	1.12246	-1.22185	0.318076	-3.84137	0.000122351	0.00228149	Hollow
Tmem229a	1.19135	-0.938964	0.246027	-3.81651	0.000135351	0.00246154	Hollow
Gpr158	2.27931	-0.644167	0.178247	-3.61389	0.000301634	0.00478512	Hollow
Zbed3	0.428963	-1.25912	0.375946	-3.3492	0.00081044	0.0107081	Hollow
Tgfbr1	0.874877	-0.904063	0.289461	-3.12327	0.00178855	0.019705	Hollow
Cd24a	8.2375	1.50369	0.139543	10.7759	4.47467e-27	2.85365e-24	Septa
Met	3.02016	2.07037	0.221492	9.34741	8.98234e-21	3.58021e-18	Septa
Gap43	43.1464	0.803117	0.0879776	9.12866	6.93554e-20	2.55174e-17	Septa
Rgs4	4.71083	1.0743	0.150524	7.13707	9.53389e-13	1.20002e-10	Septa
Tppp3	3.02592	1.07465	0.180012	5.96989	2.3741e-09	1.68227e-07	Septa
Ncald	7.59987	0.625062	0.109212	5.7234	1.04416e-08	6.16453e-07	Septa
Pkia	9.23726	0.61053	0.107738	5.66683	1.45463e-08	8.18528e-07	Septa
Tenm1	1.60782	1.20899	0.247431	4.88615	1.02825e-06	3.58987e-05	Septa
Pcdh19	1.69123	1.0684	0.260369	4.1034	4.07124e-05	0.00088112	Septa
Lypd1	3.16761	0.785682	0.217137	3.61838	0.000296454	0.00472891	Septa
Efnb3	1.72149	0.643304	0.219204	2.93472	0.00333845	0.031096	Septa
Cdh8	1.52344	0.654998	0.227979	2.87306	0.00406511	0.0361402	Septa
Susd5	0.809017	0.816312	0.284372	2.87058	0.00409722	0.0363244	Septa

## Sheet: 2. Genes screened with ISH
Gene	Pattern	Clustering gene
Barx2	Hollow	YES
Btbd3	Hollow	YES
Dapk2	Hollow	YES
Dbp	Hollow	YES
Gpr158	Hollow	YES
Grm4	Hollow	YES
Hlf	Hollow	YES
Hrh3	Hollow	YES
Ier5	Hollow	YES
Kitl	Hollow	YES
Minar1	Hollow	YES
Npas2	Hollow	YES
Nr1d1	Hollow	YES
Pamr1	Hollow	YES
Pde8b	Hollow	YES
Per3	Hollow	YES
Plxnd1	Hollow	YES
Rasd2	Hollow	YES
Rasl10a	Hollow	YES
Sema7a	Hollow	YES
Tgfbr1	Hollow	YES
Tmem229a	Hollow	YES
Usp2	Hollow	YES
Whrn	Hollow	YES
Zbed3	Hollow	YES
Arl4a	Hollow
Arntl	Hollow
Astn2	Hollow
Brinp1	Hollow
Btg1	Hollow
Cacna1i	Hollow
Cadps2	Hollow
Cnih3	Hollow
Gpr88	Hollow
Lin7a	Hollow
Nupr1	Hollow
Tmem132e	Hollow
Tob2	Hollow
Zbtb20	Hollow
Cd24a	Septa	YES
Cdh8	Septa	YES
Efnb3	Septa	YES
Gap43	Septa	YES
Lypd1	Septa	YES
Met	Septa	YES
Ncald	Septa	YES
Pcdh19	Septa	YES
Pkia	Septa	YES
Rgs4	Septa	YES
Susd5	Septa	YES
Tenm1	Septa	YES
Tppp3	Septa	YES
Acvr1b	Septa
Acvr2a	Septa
Chl1	Septa
Crmp1	Septa
Dpysl3	Septa
Dpysl5	Septa
Enc1	Septa
Gpm6a	Septa
Kcp	Septa
Map1b	Septa
Nrxn2	Septa
Rac3	Septa
Sez6l2	Septa
Smad7	Septa
Sorl1	Septa
Spock1	Septa
Syn2	Septa
Tgfbr3	Septa
Tubb2b	Septa
Tubb3	Septa
Wls	Septa
Zwint	Septa
