# Supplementary material for: Thalamocortical control of cell-type specificity drives a circuit for processing whisker-related information in mouse barrel cortex
Source: Research Square preprint supplement (doi:10.21203/rs.3.rs-2347992/v1), 2023-01-06
Supplement: Supplementary file 3 [file b896bb16c25f08297ea05f00.xlsx]

## Sheet: 1. List of ISH DNA constructs
Gene	Source	Identifier	Accession
Acvr1b	FANTOM	F930007E08	AK157910
Acvr2a	FANTOM	E130303E12	AK143186
Arl4a	FANTOM	C130086N01	AK048606
Arntl	FANTOM	I920188E18	AK147145
Astn2	FANTOM	A530086L23	AK041160
Barx2	FANTOM	2310006E12	AK009185
Brinp1	FANTOM	B230117A03	AK045420
Btbd3	FANTOM	D430043L03	AK052530
Btg1	FANTOM	C730036B02	AK149547
Cacna1i	FANTOM	M5C1084D17	AK147585
Cadps2	FANTOM	A230044C21	AK038568
Cd24a	FANTOM	5730469J20	AK133869
Cdh8	Toyoda et al. 2010	N/A	N/A
Chl1	FANTOM	4930433L04	AK132840
Cnih3	FANTOM	2900075G08	AK013789
Crmp1	FANTOM	K530044N15	AK159049
Dapk2	FANTOM	1110062I02	AK004350
Dbp	Seth Blackshaw	N/A	AW490118
Dpysl3	FANTOM	4930558M20	AK133040
Dpysl5	Seth Blackshaw	N/A	AW489804
Efnb3	FANTOM	C130048B01	AK048305
Enc1	FANTOM	C330011O05	AK049187
Etv1	FANTOM	G730026A11	AK144713
Fos	IMAGE	3655903	BG099823
Gap43	This manuscript	N/A	NM_008083.2
Gdf11	This manuscript	N/A	NM_010272.2
Gpm6a	FANTOM	E130106K16	AK053538
Gpr158	FANTOM	C630030A14	AK083234
Gpr88	This manuscript	N/A	NM_022427.3
Grm4	This manuscript	N/A	NM_001291045.2
Hlf	FANTOM	E230015K02	AK054062
Hrh3	FANTOM	B530005H20	AK140374
Ier5	FANTOM	I920034J11	AK146609
Inhbb	FANTOM	4022431B02	AK132352
Kcp	FANTOM	F630025A12	AK154369
Kitl	Suzuki-Hirano et al. 2010	N/A	NM_013598
Lin7a	FANTOM	5031438B01	AK030326
Lypd1	FANTOM	C530008O16	AK082941
Map1b	FANTOM	B130017F22	AK157749
Met	FANTOM	G370067N04	AK148258
Minar1	FANTOM	B230364M18	AK046286
Ncald	FANTOM	I530003H22	AK167313
Npas2	FANTOM	2010308N18	AK075824
Nr1d1	FANTOM	I730089C19	AK146430
Nrxn2	FANTOM	9630059J22	AK162611
Nupr1	FANTOM	2310032H04	AK009572
Pamr1	FANTOM	E430002G05	AK088017
Pcdh19	FANTOM	B530002L05	AK046726
Pde8b	FANTOM	A230060M20	AK138301
Per3	FANTOM	B020031L04	AK139878
Pkia	FANTOM	A830019K21	AK139347
Plxnd1	FANTOM	6230425C21	AK018097
Rac3	FANTOM	G430005H22	AK089930
Rasd2	FANTOM	4930526B11	AK015898
Rasl10a	FANTOM	A830080H15	AK044011
Rgs4	FANTOM	5330428J18	AK030536
Rorb	FANTOM	6330564A03	AK134790
Satb2	FANTOM	9430092A10	AK035129
Sema7a	FANTOM	F830008I15	AK156123
Sez6l2	FANTOM	G630034P06	AK165738
Smad7	This manuscript	N/A	NM_001042660.1
Sorl1	FANTOM	F630005G05	AK169953
Spock1	FANTOM	A230091C07	AK039058
Susd5	FANTOM	3930402D03	AK132299
Syn2	FANTOM	4831410C22	AK029181
Tbr1	IMAGE	303483	W09676
Tenm1	FANTOM	A130060L24	AK037897
Tgfb1	FANTOM	G430055L01	AK144163
Tgfb2	FANTOM	D330045B08	AK052377
Tgfbr1	FANTOM	F630025J19	AK154381
Tgfbr3	FANTOM	4932420A01	AK133234
Tmem132e	FANTOM	6330407G06	AK134540
Tmem229a	FANTOM	6332401O19	AK032121
Tob2	FANTOM	E970024A05	AK143542
Tppp3	FANTOM	2310024P08	AK160507
Tubb2b	FANTOM	2410129E14	AK010786
Tubb3	FANTOM	C530009K02	AK082942
Usp2	FANTOM	A430076C01	AK138799
Whrn	FANTOM	1110035G07	AK004110
Wls	FANTOM	I420009F06	AK159207
Zbed3	FANTOM	7420481I23	AK162256
Zbtb20	FANTOM	C730007E04	AK149418
Zwint	FANTOM	F630111L12	AK170637

## Sheet: 2. List of plasmids used
Plasmid	Source
pEFX-EGFP	Elizabeth Grove
pCAG-EYFP	Nobuhiko Yamamoto
pCAG-LSL-EYFP	Nobuhiko Yamamoto
pCAG-LSL-DsRed2	Nobuhiko Yamamoto
pCAG-cre	Nobuhiko Yamamoto
pCAG3-MCS-HA	Nobuhiko Yamamoto
pCAG-Smad7-HA	This manuscript
pCAG-Smad7-d2E (K312E, K316E mutant)	This manuscript
pCAG-Smad7-NLS (N-terminal SV40-NLS)	This manuscript
pCAG-LSL-Smad7-HA (lox-STOP-lox-Smad7)	This manuscript
pCAG-CyRFP1	Laviv et al. 2016	http://n2t.net/addgene:84356
pEf1a-DIO-BHTG	Schmidt et al. 2021
RabV-CVS-N2cΔG-mCherry	Reardon et al. 2016	http://n2t.net/addgene:73464
